# Supplementary material for: The landscape of circular RNA in preterm birth
Source: Front Immunol. 2022 Aug 22;13:879487. doi: 10.3389/fimmu.2022.879487 (PMC9441874; doi:10.3389/fimmu.2022.879487)
Supplement: Supplementary file 2 [file Table_1.xlsx]

## Sheet: Sheet1
Supplementary Table 1. DEC in maternal plasma of PTB
Position	CircAtlas ID	CircBase ID	CircRNADb ID	Deepbase2 ID	Circpedia2 ID	CircRNA Type	Host Gene	Log2FC	Adj.P.Val
chr14:50292585|50298079	hsa-NEMF_0007	-	hsa_circ_12769	hsa-circRNA10441-71	HSA_CIRCpedia_12231	exon	NEMF	7.2498	0.000493406
chr10:71243447|71244971	hsa-TSPAN15_0002	hsa_circ_0002758	hsa_circ_15991	hsa-circRNA958-3	HSA_CIRCpedia_2198	exon	TSPAN15	6.53548	0.00233392
chr9:17226201|17236586	hsa-CNTLN_0002	-	-	-	HSA_CIRCpedia_68081	exon	CNTLN	6.45137	0.000277543
chr3:196118684|196120490	hsa-UBXN7_0018	hsa_circ_0005051	hsa_circ_20921	hsa-circRNA13890-11	HSA_CIRCpedia_45033	exon	UBXN7	6.213	0.000205102
chr4:129960196|130003528	hsa-SCLT1_0022	-	-	hsa-circRNA14131-21	HSA_CIRCpedia_47443	exon	SCLT1	6.08615	0.00537677
chr17:11958206|11999011	hsa-MAP2K4_0001	hsa_circ_0042091	hsa_circ_03614	hsa-circRNA3241-9	HSA_CIRCpedia_19259	exon	MIR744	5.9966	0.000905826
chr15:52161414|52194233	hsa-TMOD3_0004	hsa_circ_0035292	hsa_circ_11949	hsa-circRNA2588-7	HSA_CIRCpedia_14742	exon	Y_RNA	5.92207	0.000205102
chr1:65830318|65831879	hsa-DNAJC6_0001	hsa_circ_0002454	hsa_circ_19407	hsa-circRNA332-7	HSA_CIRCpedia_32763	exon	DNAJC6	5.60377	0.000272934
chr2:68794473|68805135	hsa-APLF_0011	-	-	hsa-circRNA4471-1	HSA_CIRCpedia_92113	exon	APLF	5.5701	0.0103045
chr2:171902684|171906684	hsa-TLK1_0012	hsa_circ_0004813	hsa_circ_25344	hsa-circRNA12770-17	HSA_CIRCpedia_38573	exon	TLK1	5.54632	0.000205102
chr9:103261047|103279053	hsa-MSANTD3-TMEFF1_0004	hsa_circ_0004425	hsa_circ_28163	hsa-circRNA7751-8	HSA_CIRCpedia_62073	exon	TMEFF1	5.50372	0.0106288
chr9:33948372|33953472	hsa-UBAP2_0014	hsa_circ_0003496	hsa_circ_32282	hsa-circRNA15725-82	HSA_CIRCpedia_63920	exon	SNORD121A	5.4703	0.000205102
chr1:84644860|84663507	hsa-PRKACB_0003	-	-	hsa-circRNA369-3	HSA_CIRCpedia_33004	exon	PRKACB	5.46866	0.000205102
chr5:176370336|176385155	hsa-UIMC1_0001	hsa_circ_0001558	hsa_circ_14064	hsa-circRNA14536-9	HSA_CIRCpedia_51249	exon	UIMC1	5.42706	0.0126586
chr12:66597491|66622150	hsa-IRAK3_0001	hsa_circ_0005505	hsa_circ_17766	hsa-circRNA1864-3	HSA_CIRCpedia_9382	exon	IRAK3	5.40849	0.000905826
chr3:143513843|143551063	hsa-SLC9A9_0001	-	hsa_circ_16814	-	HSA_CIRCpedia_124645	exon	SLC9A9	5.37877	0.000205102
chr4:95494502|95507595	hsa-PDLIM5_0003	hsa_circ_0070467	hsa_circ_23778	hsa-circRNA6064-5	HSA_CIRCpedia_49623	exon	PDLIM5	5.21467	0.000205102
chr3:169889161|169896726	hsa-PHC3_0008	hsa_circ_0005362	hsa_circ_29434	hsa-circRNA13823-7	HSA_CIRCpedia_44341	exon	PHC3	5.14422	0.00149427
chr7:74119496|74131270	hsa-GTF2I_0019	hsa_circ_0006944	hsa_circ_31502	hsa-circRNA7104-151	HSA_CIRCpedia_58830	exon	GTF2I	4.99484	0.000945593
chr2:24778884|24807429	hsa-NCOA1_0053	-	-	-	-	exon	NCOA1	4.90635	0.000242383
chr2:183841621|183850955	hsa-NCKAP1_0003	hsa_circ_0057281	-	hsa-circRNA12804-21	HSA_CIRCpedia_38827	exon	NCKAP1	4.90477	0.00202205
chr1:6867043|6885270	hsa-CAMTA1_0020	hsa_circ_0008737	-	hsa-circRNA35-1	HSA_CIRCpedia_32834	exon	CAMTA1	4.67128	0.0020696
chr5:74842835|74848416	hsa-POLK_0001	hsa_circ_0073052	hsa_circ_21329	hsa-circRNA6322-6	HSA_CIRCpedia_52613	exon	POLK	4.36269	0.0355184
chr6:7303783|7310262	hsa-SSR1_0015	hsa_circ_0002947	hsa_circ_18778	hsa-circRNA14588-2	HSA_CIRCpedia_55462	exon	SSR1	4.35923	0.0121486
chr5:76758920|76760634	hsa-WDR41_0011	hsa_circ_0001498	hsa_circ_05606	hsa-circRNA14334-9	HSA_CIRCpedia_52665	exon	WDR41	3.55941	0.0321877
chr11:33307959|33309057	hsa-HIPK3_0001	hsa_circ_0000284	hsa_circ_24807	hsa-circRNA1281-1	HSA_CIRCpedia_4134	exon	HIPK3	3.06984	0.0391185
chr2:32703703|32704685	hsa-BIRC6_0288	hsa_circ_0002408	hsa_circ_06781	hsa-circRNA4390-147	HSA_CIRCpedia_40860	exon	BIRC6	-1.62142	0.035897
chr1:172100315|172222822	hsa-DNM3_0002	-	hsa_circ_06231	-	HSA_CIRCpedia_28737	exon	DNM3	-1.66528	0.0434479
chr12:42778742|42792796	hsa-PPHLN1_0008	hsa_circ_0025908	-	hsa-circRNA1742-10	HSA_CIRCpedia_8416	exon	RNU6-249P	-1.66633	0.0391185
chr18:48444480|48447557	hsa-ME2_0003	hsa_circ_0047697	-	hsa-circRNA3675-18	HSA_CIRCpedia_23966	exon	ME2	-1.70263	0.0380611
chr10:121275021|121286936	hsa-RGS10_0001	hsa_circ_0005516	hsa_circ_24238	hsa-circRNA9313-1	HSA_CIRCpedia_617	exon	RGS10	-1.75781	0.0379255
chr1:222897442|222898897	hsa-BROX_0009	-	-	-	-	exon	BROX	-1.77074	0.0414903
chr13:41517088|41518061	hsa-ELF1_0001	-	-	hsa-circRNA10268-8	HSA_CIRCpedia_10688	exon	ELF1	-1.77158	0.0401384
chr1:245165423|245180628	hsa-EFCAB2_0010	hsa_circ_0008294	hsa_circ_14291	hsa-circRNA818-3	HSA_CIRCpedia_30976	exon	EFCAB2	-1.77579	0.0321877
chr9:3647338|3651867	hsa-RFX3-AS1_0001	-	-	-	-	intron	RP11-509J21.1	-1.78641	0.0453725
chr4:148778704|148800489	hsa-ARHGAP10_0045	-	-	hsa-circRNA6139-24	HSA_CIRCpedia_68928	exon	ARHGAP10	-1.80953	0.0321877
chr4:6995911|7002978	hsa-TBC1D14_0002	hsa_circ_0006681	hsa_circ_16231	hsa-circRNA5916-15	HSA_CIRCpedia_49000	exon	AC097382.1	-1.8238	0.0379255
chr13:111274563|111276626	hsa-NAXD_0001	hsa_circ_0030883	hsa_circ_12386	hsa-circRNA2188-3	HSA_CIRCpedia_10057	exon	CARKD	-1.85459	0.0473303
chr5:88100415|88178816	hsa-MEF2C_0018	-	-	-	-	exon	MEF2C	-1.88879	0.0482626
chr3:71733723|71748859	hsa-EIF4E3_0004	-	-	-	-	exon	EIF4E3	-1.89438	0.0434747
chr10:99196948|99197507	hsa-EXOSC1_0002	hsa_circ_0004896	hsa_circ_08147	hsa-circRNA9242-2	HSA_CIRCpedia_2964	exon	EXOSC1	-1.90486	0.0479903
chr18:48444480|48458730	hsa-ME2_0007	hsa_circ_0047700	hsa_circ_26205	hsa-circRNA3675-4	HSA_CIRCpedia_23969	exon	ME2	-1.99036	0.0414903
chr15:93545407|93545547	hsa-CHD2_0041	-	-	-	HSA_CIRCpedia_84182	exon	CHD2	-1.9957	0.0355184
chr1:92327028|92327201	hsa-TGFBR3_0004	hsa_circ_0006622	hsa_circ_08647	hsa-circRNA8598-3	HSA_CIRCpedia_33149	exon	TGFBR3	-2.03536	0.0414903
chr6:17665470|17669259	hsa-NUP153_0016	hsa_circ_0002492	hsa_circ_25249	hsa-circRNA14605-7	HSA_CIRCpedia_54489	exon	NUP153	-2.03908	0.0414903
chr20:16506737|16509085	hsa-KIF16B_0010	hsa_circ_0059490	hsa_circ_03569	hsa-circRNA12993-14	HSA_CIRCpedia_33394	exon	KIF16B	-2.03993	0.0416504
chr7:115732191|115752092	hsa-TFEC_0004	-	-	hsa-circRNA15285-3	-	intron	TFEC	-2.04284	0.0349294
chr10:126370176|126370948	hsa-FAM53B_0001	hsa_circ_0000267	hsa_circ_29814	hsa-circRNA9326-3	HSA_CIRCpedia_826	exon	FAM53B	-2.06577	0.0401384
chr19:7445803|7448089	hsa-CTB-133G6_0001	-	-	-	-	exon	CTD-2207O23.3	-2.06605	0.0482626
chr11:34111726|34113603	hsa-CAPRIN1_0018	hsa_circ_0004851	hsa_circ_23876	hsa-circRNA1283-48	HSA_CIRCpedia_4174	exon	CAPRIN1	-2.06941	0.0369525
chr15:41361768|41362745	hsa-INO80_0081	hsa_circ_0007489	hsa_circ_30048	hsa-circRNA10672-72	HSA_CIRCpedia_14180	exon	INO80	-2.07082	0.0355184
chr1:91382197|91383711	hsa-ZNF644_0006	-	-	-	-	exon	ZNF644	-2.07701	0.0348004
chr4:39902046|39904080	hsa-PDS5A_0051	hsa_circ_0069524	hsa_circ_16336	hsa-circRNA13986-37	HSA_CIRCpedia_48587	exon	PDS5A	-2.08038	0.0369525
chr2:227729320|227732034	hsa-RHBDD1_0004	hsa_circ_0058493	hsa_circ_08240	hsa-circRNA4829-8	HSA_CIRCpedia_39877	exon	RHBDD1	-2.08293	0.0466268
chr19:41854200|41854360	hsa-TGFB1_0004	-	-	hsa-circRNA12206-7	HSA_CIRCpedia_26000	exon	TGFB1	-2.12112	0.0260691
chr11:130130751|130131824	hsa-ZBTB44_0001	hsa_circ_0002484	hsa_circ_02017	hsa-circRNA9784-3	HSA_CIRCpedia_3753	exon	ZBTB44	-2.12136	0.0391185
chr3:152132730|152150709	hsa-MBNL1_0001	hsa_circ_0001349	hsa_circ_27932	hsa-circRNA5778-6	HSA_CIRCpedia_44074	exon	MBNL1	-2.14233	0.0414903
chr4:129857810|129880932	hsa-SCLT1_0055	hsa_circ_0070959	-	hsa-circRNA14131-20	HSA_CIRCpedia_47433	exon	SCLT1	-2.14479	0.0379255
chr7:35707044|35712888	hsa-HERPUD2_0003	hsa_circ_0001696	hsa_circ_31198	hsa-circRNA15096-7	HSA_CIRCpedia_57969	exon	HERPUD2	-2.15069	0.0414903
chr7:104730456|104731761	hsa-KMT2E_0016	hsa_circ_0081822	hsa_circ_05081	hsa-circRNA7213-8	HSA_CIRCpedia_56161	exon	KMT2E	-2.16917	0.0230644
chr6:15452237|15468949	hsa-JARID2_0003	hsa_circ_0075675	hsa_circ_00278	hsa-circRNA6618-15	HSA_CIRCpedia_54003	exon	JARID2	-2.171	0.0455993
chr14:24680621|24681035	hsa-AL136419_0001	hsa_circ_0031359	hsa_circ_19948	hsa-circRNA10398-1	HSA_CIRCpedia_11789	exon	CHMP4A	-2.18149	0.0205461
chr1:29313943|29314417	hsa-EPB41_0001	hsa_circ_0011167	hsa_circ_21075	hsa-circRNA173-7	HSA_CIRCpedia_31252	exon	EPB41	-2.18157	0.041465
chr1:87181407|87185318	hsa-SH3GLB1_0006	hsa_circ_0013081	hsa_circ_24322	hsa-circRNA375-8	HSA_CIRCpedia_33068	exon	SH3GLB1	-2.18257	0.0415748
chr22:40825610|40831558	hsa-MKL1_0003	hsa_circ_0063452	hsa_circ_28303	hsa-circRNA13355-15	HSA_CIRCpedia_36754	exon	MKL1	-2.18992	0.0197371
chr18:39607407|39629569	hsa-PIK3C3_0001	hsa_circ_0007765	hsa_circ_04822	hsa-circRNA3657-15	HSA_CIRCpedia_23807	exon	PIK3C3	-2.19179	0.0379255
chr4:148800383|148803083	hsa-ARHGAP10_0061	hsa_circ_0008975	hsa_circ_14810	hsa-circRNA6139-33	HSA_CIRCpedia_47605	exon	ARHGAP10	-2.20079	0.0369525
chr13:46577274|46594692	hsa-ZC3H13_0023	-	-	-	HSA_CIRCpedia_113035	exon	ZC3H13	-2.20435	0.0414903
chr20:34309662|34313077	hsa-RBM39_0031	hsa_circ_0001148	hsa_circ_10359	hsa-circRNA13038-25	HSA_CIRCpedia_33962	exon	RBM39	-2.20977	0.0187441
chr10:119078383|119100613	hsa-PDZD8_0001	-	hsa_circ_21494	hsa-circRNA9302-1	HSA_CIRCpedia_518	exon	PDZD8	-2.21361	0.0414903
chr1:31465237|31468067	hsa-PUM1_0014	hsa_circ_0000043	hsa_circ_05044	hsa-circRNA8401-40	HSA_CIRCpedia_31329	exon	PUM1	-2.22303	0.0415748
chr3:107429299|107435696	hsa-BBX_0001	hsa_circ_0001324	hsa_circ_09009	hsa-circRNA5661-13	HSA_CIRCpedia_42907	exon	BBX	-2.22699	0.0482626
chr3:151067847|151073827	hsa-MED12L_0010	-	-	-	HSA_CIRCpedia_105839	exon	MED12L	-2.24958	0.0479903
chr11:118650341|118651893	hsa-DDX6_0021	-	-	hsa-circRNA9727-2	HSA_CIRCpedia_3425	exon	DDX6	-2.27242	0.0354749
chr13:78293667|78327493	hsa-SLAIN1_0003	hsa_circ_0000497	hsa_circ_06783	hsa-circRNA2161-3	HSA_CIRCpedia_11146	exon	SLAIN1	-2.27375	0.0349294
chr12:69210592|69218431	hsa-MDM2_0007	hsa_circ_0027491	hsa_circ_26070	hsa-circRNA1874-13	HSA_CIRCpedia_9456	exon	MDM2	-2.2766	0.0401384
chr3:52238709|52240767	hsa-ALAS1_0001	hsa_circ_0002338	hsa_circ_04618	hsa-circRNA5587-5	HSA_CIRCpedia_46308	exon	ALAS1	-2.27842	0.0369525
chr16:69729039|69729282	hsa-NFAT5_0039	hsa_circ_0006845	hsa_circ_16704	hsa-circRNA3086-5	HSA_CIRCpedia_18410	exon	NFAT5	-2.28234	0.0369525
chr13:26974590|26975761	hsa-CDK8_0004	hsa_circ_0003489	hsa_circ_27078	hsa-circRNA2084-1	HSA_CIRCpedia_10451	exon	CDK8	-2.28555	0.0379255
chr16:22360600|22361170	hsa-CDR2_0001	hsa_circ_0004682	hsa_circ_26698	hsa-circRNA11037-2	HSA_CIRCpedia_16980	exon	CDR2	-2.29433	0.0439727
chr7:65592691|65599361	hsa-AC068533_0001	hsa_circ_0004604	hsa_circ_22367	hsa-circRNA7092-2	HSA_CIRCpedia_58520	exon	CRCP	-2.29795	0.0414903
chr3:133907681|133914026	hsa-RYK_0010	hsa_circ_0005768	hsa_circ_28437	hsa-circRNA13755-7	HSA_CIRCpedia_43647	exon	RYK	-2.30121	0.0389189
chr3:47098311|47108608	hsa-SETD2_0002	hsa_circ_0002569	hsa_circ_06214	hsa-circRNA13512-28	HSA_CIRCpedia_45821	exon	SETD2	-2.30343	0.0337492
chr2:9048751|9098771	hsa-MBOAT2_0003	hsa_circ_0000972	hsa_circ_22272	hsa-circRNA12402-22	HSA_CIRCpedia_42586	exon	MBOAT2	-2.30398	0.0414903
chr16:31733947|31734674	hsa-ZNF720_0001	hsa_circ_0007059	hsa_circ_25507	hsa-circRNA2982-4	HSA_CIRCpedia_17498	exon	ZNF720	-2.31127	0.0355184
chr18:60206914|60217693	hsa-ZCCHC2_0018	hsa_circ_0000854	hsa_circ_22204	hsa-circRNA3696-8	HSA_CIRCpedia_24157	exon	ZCCHC2	-2.32999	0.0414903
chr11:77330651|77340944	hsa-CLNS1A_0002	hsa_circ_0008342	hsa_circ_27173	hsa-circRNA9636-15	HSA_CIRCpedia_5705	exon	CLNS1A	-2.33366	0.0400502
chr6:76331248|76344527	hsa-SENP6_0017	hsa_circ_0077078	hsa_circ_09697	hsa-circRNA6813-15	HSA_CIRCpedia_55531	exon	SENP6	-2.33608	0.0463859
chr1:78177432|78180468	hsa-USP33_0006	-	-	hsa-circRNA8568-27	HSA_CIRCpedia_32929	exon	USP33	-2.34637	0.0414903
chr3:51575605|51624575	hsa-RAD54L2_0010	hsa_circ_0006909	hsa_circ_13015	hsa-circRNA5584-14	-	exon	RAD54L2	-2.36772	0.0379255
chr7:48541722|48542148	hsa-ABCA13_0002	hsa_circ_0001707	-	hsa-circRNA7074	-	intron	ABCA13	-2.37235	0.0473836
chr11:110007388|110008139	hsa-ZC3H12C_0001	hsa_circ_0005348	hsa_circ_11254	hsa-circRNA1533-2	HSA_CIRCpedia_3213	exon	ZC3H12C	-2.38605	0.0434479
chr1:28800066|28802803	hsa-PHACTR4_0009	hsa_circ_0000038	hsa_circ_05445	hsa-circRNA166-16	HSA_CIRCpedia_31210	exon	PHACTR4	-2.41503	0.0455993
chr4:123977542|123978443	hsa-SPATA5_0001	hsa_circ_0006112	hsa_circ_03805	hsa-circRNA6107-1	HSA_CIRCpedia_47358	exon	SPATA5	-2.43225	0.0439727
chr15:41377567|41379880	hsa-INO80_0014	hsa_circ_0004279	hsa_circ_10810	hsa-circRNA10672-25	HSA_CIRCpedia_14198	exon	INO80	-2.4588	0.0369525
chr3:142144064|142145683	hsa-XRN1_0003	hsa_circ_0067620	hsa_circ_23477	hsa-circRNA13772-26	HSA_CIRCpedia_43897	exon	XRN1	-2.47447	0.0260691
chr2:44729828|44732869	hsa-CAMKMT_0011	hsa_circ_0000996	-	hsa-circRNA4424-1	-	intron	CAMKMT	-2.48181	0.0441163
chr12:93192668|93192862	hsa-EEA1_0025	-	hsa_circ_13724	hsa-circRNA10058-2	HSA_CIRCpedia_9771	exon	EEA1	-2.4886	0.0399108
chr7:152007051|152012423	hsa-KMT2C_0001	hsa_circ_0001769	hsa_circ_32798	hsa-circRNA15380-16	HSA_CIRCpedia_57295	exon	KMT2C	-2.49111	0.0369299
chr3:138289160|138291774	hsa-CEP70_0018	hsa_circ_0004524	hsa_circ_20883	hsa-circRNA13763-10	HSA_CIRCpedia_43786	exon	CEP70	-2.49735	0.0418158
chr15:59204762|59205895	hsa-SLTM_0002	hsa_circ_0003713	hsa_circ_09177	hsa-circRNA10752-16	HSA_CIRCpedia_14910	exon	SLTM	-2.50351	0.041465
chr17:57808782|57851246	hsa-VMP1_0002	hsa_circ_0005077	hsa_circ_06346	hsa-circRNA3464-7	HSA_CIRCpedia_21662	exon	VMP1	-2.51235	0.0369299
chr17:45479498|45492285	hsa-EFCAB13_0001	hsa_circ_0000778	hsa_circ_22778	hsa-circRNA3410-2	HSA_CIRCpedia_21142	exon	EFCAB13	-2.53532	0.0414903
chr11:85707869|85714494	hsa-PICALM_0006	hsa_circ_0023919	hsa_circ_14065	hsa-circRNA9655-21	HSA_CIRCpedia_5890	exon	PICALM	-2.54215	0.0414903
chr1:231090079|231097049	hsa-TTC13_0001	hsa_circ_0000195	hsa_circ_27576	hsa-circRNA8986-20	HSA_CIRCpedia_30508	exon	TTC13	-2.552	0.0225412
chr2:190593386|190609514	hsa-ANKAR_0007	hsa_circ_0005644	hsa_circ_04776	hsa-circRNA4727-7	HSA_CIRCpedia_38891	exon	ANKAR	-2.55765	0.0414903
chr20:35812583|35812776	hsa-RPN2_0008	hsa_circ_0005759	hsa_circ_31183	hsa-circRNA5004-46	HSA_CIRCpedia_34094	exon	RPN2	-2.5743	0.0379255
chr15:41961026|41962156	hsa-MGA_0049	hsa_circ_0000591	hsa_circ_01692	hsa-circRNA2540-32	HSA_CIRCpedia_14241	exon	MGA	-2.57467	0.0303923
chr1:91438710|91447927	hsa-ZNF644_0016	-	-	hsa-circRNA8595-7	HSA_CIRCpedia_33130	exon	ZNF644	-2.58591	0.0379255
chr7:102944289|102944937	hsa-PMPCB_0001	hsa_circ_0008540	hsa_circ_21954	hsa-circRNA7211-1	HSA_CIRCpedia_56099	exon	PMPCB	-2.58658	0.0395822
chr22:41738533|41739580	hsa-ZC3H7B_0019	hsa_circ_0001236	hsa_circ_14216	hsa-circRNA5348-3	HSA_CIRCpedia_36856	exon	ZC3H7B	-2.59247	0.0219075
chr14:102659800|102661457	hsa-WDR20_0002	hsa_circ_0000569	hsa_circ_31954	hsa-circRNA2438-3	HSA_CIRCpedia_11449	exon	WDR20	-2.60814	0.0441163
chr20:10536879|10541468	hsa-SLX4IP_0001	hsa_circ_0005704	hsa_circ_19427	hsa-circRNA4930-3	HSA_CIRCpedia_33330	exon	SLX4IP	-2.62911	0.0401384
chr12:123983091|123984083	hsa-RILPL1_0001	hsa_circ_0007552	hsa_circ_18421	hsa-circRNA10191-3	HSA_CIRCpedia_7481	exon	RILPL1	-2.63712	0.0369525
chr5:65349234|65350779	hsa-ERBIN_0004	hsa_circ_0072732	hsa_circ_15483	hsa-circRNA6289-4	HSA_CIRCpedia_52237	exon	ERBB2IP	-2.64401	0.0415748
chr4:42505467|42526864	hsa-ATP8A1_0025	hsa_circ_0069612	hsa_circ_09479	hsa-circRNA13990-17	HSA_CIRCpedia_48684	exon	ATP8A1	-2.64472	0.0482626
chr15:44106699|44107272	hsa-MFAP1_0002	-	-	-	HSA_CIRCpedia_152388	exon	MFAP1	-2.66087	0.0355184
chr8:74585342|74601048	hsa-STAU2_0017	hsa_circ_0001811	hsa_circ_06205	hsa-circRNA15524-2	HSA_CIRCpedia_61667	exon	STAU2	-2.66662	0.0379255
chr3:169700495|169706147	hsa-SEC62_0006	hsa_circ_0067883	-	hsa-circRNA5802-4	HSA_CIRCpedia_112980	exon	SEC62	-2.67147	0.0369525
chr7:64004085|64004810	hsa-ZNF680_0001	hsa_circ_0002566	hsa_circ_29862	hsa-circRNA15148-4	HSA_CIRCpedia_58439	exon	ZNF680	-2.70098	0.0379255
chr14:39646616|39647120	hsa-PNN_0011	-	hsa_circ_28955	hsa-circRNA2272-5	HSA_CIRCpedia_12130	exon	PNN	-2.70295	0.0354749
chr4:78694235|78697546	hsa-CNOT6L_0002	hsa_circ_0006168	hsa_circ_23943	hsa-circRNA14038-11	HSA_CIRCpedia_49193	exon	CNOT6L	-2.70414	0.0369525
chr5:167915607|167921655	hsa-RARS_0012	hsa_circ_0001550	hsa_circ_21209	hsa-circRNA6529-14	HSA_CIRCpedia_51048	exon	RARS	-2.70794	0.0355184
chr17:27975162|27977818	hsa-SSH2_0005	hsa_circ_0042799	hsa_circ_20222	hsa-circRNA11411-50	HSA_CIRCpedia_19967	exon	SSH2	-2.71293	0.0174732
chr7:104714066|104717880	hsa-KMT2E_0029	hsa_circ_0001736	hsa_circ_08511	hsa-circRNA7213-23	HSA_CIRCpedia_56155	exon	KMT2E	-2.74073	0.0225412
chr3:141811903|141820683	hsa-TFDP2_0010	hsa_circ_0008304	hsa_circ_26016	hsa-circRNA13770-3	HSA_CIRCpedia_43868	exon	TFDP2	-2.74812	0.0354749
chr3:121354582|121356103	hsa-HCLS1_0002	-	hsa_circ_29428	hsa-circRNA13699-3	HSA_CIRCpedia_43147	exon	HCLS1	-2.74986	0.0414903
chr2:171973828|171974367	hsa-TLK1_0057	-	-	hsa-circRNA12770-43	-	intron	TLK1	-2.75571	0.0414903
chr5:6623327|6625782	hsa-NSUN2_0002	hsa_circ_0007380	hsa_circ_06181	hsa-circRNA14234-27	HSA_CIRCpedia_52267	exon	NSUN2	-2.78077	0.0379255
chr16:24762047|24769681	hsa-TNRC6A_0001	-	-	-	HSA_CIRCpedia_113296	exon	TNRC6A	-2.78623	0.0369525
chr1:92798948|92846430	hsa-RPAP2_0007	hsa_circ_0000091	hsa_circ_03016	hsa-circRNA388-2	HSA_CIRCpedia_33163	exon	RPAP2	-2.78627	0.0369525
chr17:65941525|65972074	hsa-BPTF_0045	hsa_circ_0000799	hsa_circ_00011	hsa-circRNA3488-33	HSA_CIRCpedia_22187	exon	BPTF	-2.7891	0.0369299
chr9:126519982|126531842	hsa-DENND1A_0001	hsa_circ_0088474	hsa_circ_30563	hsa-circRNA15918-64	HSA_CIRCpedia_62707	exon	DENND1A	-2.79963	0.0479903
chr4:48371866|48385801	hsa-SLAIN2_0001	-	hsa_circ_10409	hsa-circRNA5984-7	HSA_CIRCpedia_48752	exon	SLAIN2	-2.80158	0.0187441
chr11:16205432|16208501	hsa-SOX6_0009	hsa_circ_0021350	hsa_circ_15006	hsa-circRNA9424-10	HSA_CIRCpedia_3829	exon	SOX6	-2.81264	0.0379255
chr1:15860732|15863309	hsa-DNAJC16_0001	hsa_circ_0000018	hsa_circ_07475	hsa-circRNA79-5	HSA_CIRCpedia_28367	exon	DNAJC16	-2.8157	0.0401384
chr14:56119568|56126421	hsa-KTN1_0013	-	-	-	HSA_CIRCpedia_120998	exon	KTN1	-2.81583	0.0388366
chr10:52279591|52350007	hsa-SGMS1_0011	hsa_circ_0018405	hsa_circ_31862	hsa-circRNA9132-13	HSA_CIRCpedia_1814	exon	RMRPP4	-2.8228	0.0414903
chr7:56049903|56051561	hsa-GBAS_0020	hsa_circ_0001709	hsa_circ_05348	hsa-circRNA7081-9	HSA_CIRCpedia_58309	exon	GBAS	-2.82291	0.0240076
chr2:217005909|217006204	hsa-XRCC5_0025	-	-	-	-	intron	XRCC5	-2.84607	0.0360964
chr18:9204474|9221997	hsa-ANKRD12_0039	hsa_circ_0003865	hsa_circ_18438	hsa-circRNA3600-22	HSA_CIRCpedia_24456	exon	RP11-21J18.1	-2.84703	0.022701
chr15:89656956|89659752	hsa-ABHD2_0002	hsa_circ_0007099	hsa_circ_16970	hsa-circRNA2718-21	HSA_CIRCpedia_16024	exon	ABHD2	-2.84753	0.0192856
chr17:27778473|27794234	hsa-TAOK1_0029	hsa_circ_0008866	hsa_circ_21735	hsa-circRNA3303-24	HSA_CIRCpedia_19927	exon	TAOK1	-2.84863	0.0240076
chr15:64791492|64792365	hsa-ZNF609_0001	hsa_circ_0000615	-	hsa-circRNA2613-8	-	exon	ZNF609	-2.85171	0.0369525
chr5:138699448|138700432	hsa-PAIP2_0001	hsa_circ_0001538	hsa_circ_06047	hsa-circRNA6459	HSA_CIRCpedia_50476	exon	PAIP2	-2.87295	0.0400948
chr16:18852887|18856973	hsa-SMG1_0001	hsa_circ_0006434	hsa_circ_31847	hsa-circRNA11025-14	HSA_CIRCpedia_16761	exon	SMG1	-2.89114	0.0379255
chr11:85722073|85742653	hsa-PICALM_0008	hsa_circ_0000347	hsa_circ_10091	hsa-circRNA9655-46	HSA_CIRCpedia_5907	exon	PICALM	-2.89204	0.0103045
chr11:124517261|124518071	hsa-SIAE_0002	hsa_circ_0000367	hsa_circ_26295	hsa-circRNA9754-2	HSA_CIRCpedia_3594	exon	SIAE	-2.91807	0.0197371
chr1:21377359|21437876	hsa-EIF4G3_0080	hsa_circ_0000026	hsa_circ_02549	hsa-circRNA8346-69	HSA_CIRCpedia_29966	exon	EIF4G3	-2.91884	0.0379255
chr9:96233423|96261168	hsa-FAM120A_0006	hsa_circ_0001875	hsa_circ_27396	hsa-circRNA7721-39	HSA_CIRCpedia_64725	exon	FAM120A	-2.94565	0.0355184
chrX:117676688|117680079	hsa-DOCK11_0001	-	hsa_circ_05440	hsa-circRNA8128-5	HSA_CIRCpedia_65068	exon	DOCK11	-2.94875	0.0455317
chr6:52935855|52941341	hsa-FBXO9_0002	hsa_circ_0003700	hsa_circ_15084	hsa-circRNA6785-12	HSA_CIRCpedia_55268	exon	FBXO9	-2.97436	0.0355184
chr9:2191266|2192802	hsa-SMARCA2_0089	hsa_circ_0006082	hsa_circ_04681	hsa-circRNA7606	-	exon	SMARCA2	-2.97818	0.0136027
chr15:66641398|66641775	hsa-TIPIN_0006	hsa_circ_0008988	hsa_circ_27368	hsa-circRNA10792-1	HSA_CIRCpedia_15345	exon	TIPIN	-3.00942	0.0187441
chr5:140961879|140963182	hsa-DIAPH1_0002	hsa_circ_0008982	hsa_circ_24391	hsa-circRNA14455-6	HSA_CIRCpedia_50553	exon	DIAPH1	-3.01738	0.0240076
chr9:134381501|134381840	hsa-POMT1_0006	hsa_circ_0001897	hsa_circ_26989	hsa-circRNA7861-6	HSA_CIRCpedia_63252	exon	POMT1	-3.02416	0.0369525
chr1:36826822|36828257	hsa-STK40_0006	hsa_circ_0000053	-	hsa-circRNA8435-8	HSA_CIRCpedia_31661	exon	STK40	-3.02923	0.0188421
chr17:57430576|57430887	hsa-YPEL2_0001	hsa_circ_0005600	hsa_circ_06075	hsa-circRNA3461-3	HSA_CIRCpedia_21634	exon	YPEL2	-3.03046	0.0379255
chr1:40529899|40530231	hsa-CAP1_0001	hsa_circ_0009142	hsa_circ_22775	hsa-circRNA223-2	HSA_CIRCpedia_31801	exon	CAP1	-3.03066	0.0369525
chr21:36206707|36231875	hsa-RUNX1_0001	hsa_circ_0002360	hsa_circ_08485	hsa-circRNA13181-11	HSA_CIRCpedia_35352	exon	RUNX1	-3.03632	0.0369525
chr18:19345733|19359646	hsa-MIB1_0003	hsa_circ_0000835	hsa_circ_23867	hsa-circRNA3625-48	HSA_CIRCpedia_23331	exon	AC091038.1	-3.07154	0.0379255
chr10:24918925|24924032	hsa-ARHGAP21_0001	-	hsa_circ_03772	hsa-circRNA9080-18	HSA_CIRCpedia_1275	exon	ARHGAP21	-3.11112	0.0390488
chr12:70193989|70195501	hsa-RAB3IP_0013	hsa_circ_0000419	hsa_circ_27724	hsa-circRNA1881-7	HSA_CIRCpedia_9499	exon	RAB3IP	-3.12853	0.0354749
chr10:74474869|74475660	hsa-MCU_0001	hsa_circ_0000247	hsa_circ_19646	hsa-circRNA978-6	HSA_CIRCpedia_2308	exon	MCU	-3.13616	0.0254059
chr4:56877578|56878151	hsa-CEP135_0004	hsa_circ_0003985	hsa_circ_32532	hsa-circRNA5996-7	HSA_CIRCpedia_48896	exon	CEP135	-3.14071	0.0168484
chr2:61343114|61345251	hsa-KIAA1841_0001	hsa_circ_0007793	hsa_circ_26895	hsa-circRNA4451-6	HSA_CIRCpedia_41802	exon	KIAA1841	-3.14279	0.0229533
chr2:201721405|201721708	hsa-CLK1_0011	hsa_circ_0004001	hsa_circ_01253	hsa-circRNA12836-5	HSA_CIRCpedia_39111	exon	CLK1	-3.17344	0.0240076
chr6:117019867|117026323	hsa-KPNA5_0009	hsa_circ_0001639	hsa_circ_27299	hsa-circRNA6873-15	HSA_CIRCpedia_53383	exon	KPNA5	-3.17582	0.0354749
chr3:195101738|195112876	hsa-ACAP2_0002	hsa_circ_0007331	hsa_circ_01391	hsa-circRNA13881-17	HSA_CIRCpedia_44965	exon	ACAP2	-3.1825	0.0369915
chr9:132719639|132720832	hsa-FNBP1_0014	hsa_circ_0007426	hsa_circ_32121	hsa-circRNA15959-17	HSA_CIRCpedia_63119	exon	FNBP1	-3.18539	0.0355184
chr11:2997254|3000467	hsa-NAP1L4_0016	hsa_circ_0003834	hsa_circ_17667	hsa-circRNA9370-20	HSA_CIRCpedia_4065	exon	NAP1L4	-3.19089	0.0303923
chr15:25650608|25660989	hsa-UBE3A_0031	hsa_circ_0005147	-	hsa-circRNA10624-26	-	intron	UBE3A	-3.23064	0.00448547
chr12:96692647|96694138	hsa-CDK17_0030	hsa_circ_0007881	hsa_circ_10248	hsa-circRNA10073-3	HSA_CIRCpedia_9890	exon	CDK17	-3.23193	0.0170851
chr2:136527339|136528305	hsa-UBXN4_0005	-	-	-	HSA_CIRCpedia_134763	exon	UBXN4	-3.25619	0.0223633
chr15:76152219|76165909	hsa-UBE2Q2_0012	-	hsa_circ_28760	hsa-circRNA2674-4	HSA_CIRCpedia_15720	exon	UBE2Q2	-3.26419	0.0393883
chr2:144966170|144969146	hsa-GTDC1_0018	hsa_circ_0001072	hsa_circ_30539	hsa-circRNA12719-5	HSA_CIRCpedia_38052	exon	GTDC1	-3.2703	0.0370556
chr21:17205667|17214859	hsa-USP25_0091	hsa_circ_0005238	hsa_circ_01572	hsa-circRNA5121-31	HSA_CIRCpedia_35084	exon	USP25	-3.27645	0.0370556
chr19:39943996|39944161	hsa-SUPT5H_0005	hsa_circ_0000932	hsa_circ_16924	hsa-circRNA4084-20	HSA_CIRCpedia_25896	exon	SUPT5H	-3.27776	0.0414903
chr7:158580695|158591763	hsa-ESYT2_0001	hsa_circ_0001777	hsa_circ_29738	hsa-circRNA15390-50	HSA_CIRCpedia_57474	exon	ESYT2	-3.28867	0.0390488
chr14:97299804|97327072	hsa-VRK1_0002	hsa_circ_0000566	hsa_circ_08594	hsa-circRNA2424-9	HSA_CIRCpedia_13554	exon	VRK1	-3.29696	0.0369299
chr4:37633007|37640126	hsa-RELL1_0005	hsa_circ_0001400	hsa_circ_08846	hsa-circRNA13975-5	HSA_CIRCpedia_48457	exon	RELL1	-3.30181	0.0355184
chr6:10703638|10705077	hsa-PAK1IP1_0005	hsa_circ_0008053	hsa_circ_14720	hsa-circRNA6608-6	HSA_CIRCpedia_53207	exon	PAK1IP1	-3.3278	0.0145618
chr10:102683732|102685776	hsa-SLF2_0001	hsa_circ_0006654	hsa_circ_21890	hsa-circRNA1063-21	HSA_CIRCpedia_84	exon	FAM178A	-3.3361	0.0349294
chr1:151139410|151139890	hsa-SCNM1_0001	hsa_circ_0000128	hsa_circ_22177	hsa-circRNA507-2	HSA_CIRCpedia_27910	exon	SCNM1	-3.34396	0.0159423
chr8:71071740|71075089	hsa-NCOA2_0026	hsa_circ_0001810	hsa_circ_24170	hsa-circRNA15517-12	HSA_CIRCpedia_61630	exon	NCOA2	-3.35485	0.0176742
chr1:8716032|8716500	hsa-RERE_0023	-	hsa_circ_12952	hsa-circRNA8283-30	HSA_CIRCpedia_33067	exon	RERE	-3.36852	0.0170851
chr11:108137898|108138069	hsa-ATM_0006	hsa_circ_0007694	hsa_circ_21040	hsa-circRNA1531-91	HSA_CIRCpedia_3156	exon	ATM	-3.4185	0.0416923
chr7:115750762|115752092	hsa-TFEC_0003	-	-	hsa-circRNA15285-1	HSA_CIRCpedia_157207	exon	TFEC	-3.44131	0.0369525
chr1:222897434|222898897	hsa-BROX_0007	hsa_circ_0003413	hsa_circ_13157	hsa-circRNA761-1	HSA_CIRCpedia_30178	exon	BROX	-3.46124	0.0174732
chr3:169854207|169867032	hsa-PHC3_0005	hsa_circ_0001359	hsa_circ_25738	hsa-circRNA13823-15	HSA_CIRCpedia_44331	exon	PHC3	-3.49717	0.0159423
chr10:16794538|16824083	hsa-RSU1_0003	hsa_circ_0006577	hsa_circ_16072	hsa-circRNA9065-2	HSA_CIRCpedia_1131	exon	RSU1	-3.49915	0.0379255
chr10:17746430|17747740	hsa-STAM_0008	hsa_circ_0008311	hsa_circ_26583	hsa-circRNA865-22	HSA_CIRCpedia_1150	exon	STAM	-3.54076	0.0189483
chr1:155646339|155649303	hsa-YY1AP1_0001	hsa_circ_0014606	hsa_circ_11093	hsa-circRNA8779-59	HSA_CIRCpedia_28207	exon	YY1AP1	-3.54376	0.0111946
chr19:20828490|20829211	hsa-CTC-513N18_0001	hsa_circ_0050277	-	hsa-circRNA12119	HSA_CIRCpedia_25324	exon	ZNF626	-3.55713	0.0138886
chr17:76000251|76027923	hsa-TNRC6C_0002	hsa_circ_0008622	-	hsa-circRNA3542-1	-	exon	TNRC6C	-3.58057	0.0136027
chr4:178274462|178281831	hsa-NEIL3_0001	hsa_circ_0001460	hsa_circ_00262	hsa-circRNA6178-1	HSA_CIRCpedia_47994	exon	NEIL3	-3.59497	0.0170851
chr14:50616726|50616948	hsa-SOS2_0052	hsa_circ_0007695	hsa_circ_00172	hsa-circRNA10446-32	HSA_CIRCpedia_12254	exon	SOS2	-3.59668	0.015788
chr13:47297356|47308133	hsa-LRCH1_0001	hsa_circ_0002215	hsa_circ_22690	hsa-circRNA2128-5	HSA_CIRCpedia_10832	exon	LRCH1	-3.61167	0.0110322
chr11:34978931|34999729	hsa-PDHX_0017	hsa_circ_0021712	hsa_circ_26059	hsa-circRNA1290-8	HSA_CIRCpedia_4218	exon	PDHX	-3.61445	0.0168484
chr7:148716084|148718239	hsa-PDIA4_0001	hsa_circ_0001766	hsa_circ_02026	hsa-circRNA15357-4	HSA_CIRCpedia_57179	exon	PDIA4	-3.62831	0.00233392
chr8:103372299|103373854	hsa-UBR5_0001	hsa_circ_0001819	hsa_circ_19504	hsa-circRNA15570-114	HSA_CIRCpedia_59733	exon	UBR5	-3.64072	0.0159423
chr16:88061089|88071617	hsa-BANP_0012	hsa_circ_0040823	hsa_circ_28793	hsa-circRNA3136-3	HSA_CIRCpedia_19025	exon	BANP	-3.67889	0.0121486
chr11:120276827|120280159	hsa-ARHGEF12_0001	hsa_circ_0024605	hsa_circ_25573	hsa-circRNA1579-12	HSA_CIRCpedia_3478	exon	ARHGEF12	-3.69111	0.0369525
chr2:233651860|233660931	hsa-GIGYF2_0001	hsa_circ_0058733	hsa_circ_22732	hsa-circRNA4845-3	HSA_CIRCpedia_40051	exon	GIGYF2	-3.70246	0.0151283
chr9:33271150|33278223	hsa-CHMP5_0007	hsa_circ_0003575	hsa_circ_06408	hsa-circRNA7638-6	HSA_CIRCpedia_63854	exon	CHMP5	-3.72066	0.0197371
chr7:99952766|99953427	hsa-PILRB_0001	hsa_circ_0005925	-	hsa-circRNA7182-5	-	exon	STAG3L5P-PVRIG2P-PILRB	-3.72089	0.00425018
chr14:58785260|58796887	hsa-ARID4A_0003	hsa_circ_0000542	hsa_circ_19111	hsa-circRNA2312-11	HSA_CIRCpedia_12521	exon	ARID4A	-3.73106	0.0138546
chr19:52785364|52786666	hsa-ZNF766_0001	hsa_circ_0052095	hsa_circ_12697	hsa-circRNA4234-1	HSA_CIRCpedia_26564	exon	ZNF766	-3.77965	0.0098859
chr4:39328183|39329376	hsa-RFC1_0002	hsa_circ_0001403	hsa_circ_17016	hsa-circRNA13981-15	HSA_CIRCpedia_48531	exon	RFC1	-3.83415	0.0020696
chr16:80718435|80719026	hsa-CDYL2_0001	hsa_circ_0004087	hsa_circ_12082	hsa-circRNA11197-4	HSA_CIRCpedia_18832	exon	CDYL2	-3.89261	0.00862496
chr12:121220458|121222396	hsa-SPPL3_0001	hsa_circ_0003472	hsa_circ_04060	hsa-circRNA10161-2	HSA_CIRCpedia_7153	exon	SPPL3	-3.91183	0.00138272
chr10:70719562|70720005	hsa-DDX21_0005	hsa_circ_0008865	hsa_circ_25253	hsa-circRNA952-5	HSA_CIRCpedia_2144	exon	DDX21	-3.92425	0.0132217
chr1:1747195|1756938	hsa-GNB1_0019	hsa_circ_0000008	hsa_circ_04534	hsa-circRNA8255-25	HSA_CIRCpedia_28865	exon	GNB1	-3.95908	0.00863963
chr8:62531537|62557191	hsa-AC090094_0017	-	hsa_circ_27625	hsa-circRNA15506-14	HSA_CIRCpedia_61432	exon	ASPH	-3.96046	0.0159423
chr13:41515057|41518061	hsa-ELF1_0008	hsa_circ_0030051	hsa_circ_05869	hsa-circRNA10268-6	HSA_CIRCpedia_10686	exon	ELF1	-4.00776	0.00233392
chr11:72695133|72700142	hsa-FCHSD2_0006	hsa_circ_0005918	hsa_circ_02506	hsa-circRNA9617-17	HSA_CIRCpedia_5524	exon	FCHSD2	-4.01421	0.00850694
chr8:37734627|37735069	hsa-RAB11FIP1_0002	hsa_circ_0001789	hsa_circ_11767	hsa-circRNA15471-7	HSA_CIRCpedia_60932	exon	RAB11FIP1	-4.0426	0.00381196
chr8:106431372|106456609	hsa-ZFPM2_0004	hsa_circ_0003380	hsa_circ_06510	hsa-circRNA7534-12	HSA_CIRCpedia_59789	exon	RP11-127H5.1	-4.13484	0.0133638
chr20:30954187|30956926	hsa-ASXL1_0001	hsa_circ_0001136	hsa_circ_10491	hsa-circRNA4972-10	HSA_CIRCpedia_33658	exon	ASXL1	-4.21879	0.0103438
chr1:25553933|25554726	hsa-SYF2_0001	-	-	hsa-circRNA8369-1	HSA_CIRCpedia_31069	exon	SYF2	-4.24957	0.0103438
chr5:171482592|171484477	hsa-STK10_0005	hsa_circ_0001555	hsa_circ_32386	hsa-circRNA14520-14	HSA_CIRCpedia_51171	exon	STK10	-4.27033	0.00863963
chr11:85733410|85742653	hsa-PICALM_0009	hsa_circ_0023942	hsa_circ_12975	hsa-circRNA9655-3	HSA_CIRCpedia_5910	exon	PICALM	-4.30913	0.0414903
chr9:37126309|37126939	hsa-ZCCHC7_0001	hsa_circ_0001860	hsa_circ_28318	hsa-circRNA7664-29	HSA_CIRCpedia_64114	exon	ZCCHC7	-4.3876	0.00420726
chr19:57967021|57967550	hsa-AC004076_0001	hsa_circ_0000963	hsa_circ_29625	hsa-circRNA12372-2	HSA_CIRCpedia_26690	exon	VN1R1	-4.44514	0.00286836
chr4:128995615|128999117	hsa-LARP1B_0015	hsa_circ_0001438	hsa_circ_25298	hsa-circRNA6114-7	HSA_CIRCpedia_47403	exon	LARP1B	-4.44717	0.0098859
chr3:47676680|47677626	hsa-SMARCC1_0103	hsa_circ_0065251	hsa_circ_25120	hsa-circRNA13518-51	HSA_CIRCpedia_45907	exon	SMARCC1	-4.48907	0.00233392
chr1:9991949|9994918	hsa-LZIC_0003	hsa_circ_0000014	hsa_circ_31394	hsa-circRNA8290-2	HSA_CIRCpedia_33327	exon	LZIC	-4.5713	0.0482626
chr7:90376996|90419967	hsa-CDK14_0004	hsa_circ_0001722	hsa_circ_19512	hsa-circRNA7146-11	HSA_CIRCpedia_59236	exon	CDK14	-4.58777	0.00284669
chr14:71880665|71884913	hsa-SIPA1L1_0031	-	-	hsa-circRNA2355-1	HSA_CIRCpedia_12920	exon	SIPA1L1	-4.77957	0.0103438
chr4:129913322|129925031	hsa-SCLT1_0002	hsa_circ_0001439	hsa_circ_23944	hsa-circRNA14131-7	HSA_CIRCpedia_47439	exon	SCLT1	-4.85778	0.0369525
chr10:5836848|5842668	hsa-GDI2_0003	hsa_circ_0002665	hsa_circ_14735	hsa-circRNA9039-1	HSA_CIRCpedia_1864	exon	GDI2	-4.85984	0.000945593
chr15:65471272|65472542	hsa-CLPX_0007	hsa_circ_0004374	hsa_circ_08041	hsa-circRNA10781-10	HSA_CIRCpedia_15224	exon	CLPX	-4.874	0.00138272
chr8:37623044|37623873	hsa-PROSC_0001	hsa_circ_0001788	hsa_circ_21066	hsa-circRNA7417-5	HSA_CIRCpedia_60919	exon	PROSC	-4.91844	0.0369525
chr16:30495148|30495584	hsa-ITGAL_0002	hsa_circ_0000690	hsa_circ_06000	hsa-circRNA2957-28	HSA_CIRCpedia_17426	exon	ITGAL	-4.94957	0.000945593
chr3:50145503|50145737	hsa-RBM5_0023	hsa_circ_0001305	hsa_circ_00764	hsa-circRNA5571-46	HSA_CIRCpedia_46206	exon	RBM5	-5.08416	0.000905826
chr21:37711077|37717005	hsa-MORC3_0001	hsa_circ_0001189	hsa_circ_26085	hsa-circRNA5148-25	-	exon	MORC3	-5.14716	0.00254855
chr8:109462052|109462721	hsa-EMC2_0004	-	-	hsa-circRNA7536-6	HSA_CIRCpedia_59812	exon	EMC2	-5.15852	0.000905826
chr12:57059988|57064148	hsa-PTGES3_0003	hsa_circ_0027089	-	hsa-circRNA9994-8	HSA_CIRCpedia_9099	exon	PTGES3	-5.21471	0.0465219
chr11:77330651|77336863	hsa-CLNS1A_0006	hsa_circ_0023694	hsa_circ_20108	hsa-circRNA9636-5	HSA_CIRCpedia_5704	exon	CLNS1A	-5.2234	0.0441168
chr7:77214860|77230123	hsa-PTPN12_0037	hsa_circ_0003764	hsa_circ_29620	hsa-circRNA7132-29	HSA_CIRCpedia_59025	exon	PTPN12	-5.25443	0.0483048
chr11:77336008|77336863	hsa-CLNS1A_0007	hsa_circ_0000343	hsa_circ_10287	hsa-circRNA9636-19	HSA_CIRCpedia_5709	exon	CLNS1A	-5.32244	0.000905826
chrX:53430498|53430825	hsa-SMC1A_0005	hsa_circ_0001921	hsa_circ_24669	hsa-circRNA16133-3	HSA_CIRCpedia_66014	exon	SMC1A	-5.35933	0.0483474
chr7:102962379|102963241	hsa-DNAJC2_0003	hsa_circ_0081751	-	hsa-circRNA15262-7	HSA_CIRCpedia_68335	exon	DNAJC2	-5.43154	0.0489879
chr1:113196220|113202401	hsa-CAPZA1_0004	hsa_circ_0000109	hsa_circ_12733	hsa-circRNA455-10	HSA_CIRCpedia_27340	exon	CAPZA1	-5.62749	0.000242383
chr1:117944808|117948267	hsa-MAN1A2_0004	hsa_circ_0000116	hsa_circ_11652	hsa-circRNA471-28	HSA_CIRCpedia_69178	exon	MAN1A2	-5.63259	0.0369525
chr1:24840804|24841057	hsa-RCAN3_0002	hsa_circ_0003553	hsa_circ_22201	hsa-circRNA124-2	HSA_CIRCpedia_31051	exon	RCAN3	-5.64411	0.0391185
chr19:47767860|47768203	hsa-CCDC9_0002	hsa_circ_0000944	hsa_circ_03870	hsa-circRNA4163-5	HSA_CIRCpedia_26286	exon	CCDC9	-5.71532	0.0303923
chr14:39648295|39648666	hsa-PNN_0002	-	hsa_circ_14148	hsa-circRNA2272-3	HSA_CIRCpedia_12131	exon	PNN	-5.82587	0.0401384
chr9:33971649|33973235	hsa-UBAP2_0013	hsa_circ_0001851	hsa_circ_17341	hsa-circRNA15725-70	HSA_CIRCpedia_63943	exon	UBAP2	-5.95874	0.000205102
chr5:137320946|137324004	hsa-FAM13B_0019	hsa_circ_0001535	hsa_circ_11413	hsa-circRNA14431-37	HSA_CIRCpedia_50348	exon	FAM13B	-6.00157	0.0467578
chr3:196214270|196215554	hsa-RNF168_0001	-	hsa_circ_02590	hsa-circRNA13891-2	HSA_CIRCpedia_45037	exon	RNF168	-6.05395	0.00508846
chr4:153332455|153333681	hsa-FBXW7_0005	hsa_circ_0001451	hsa_circ_16502	hsa-circRNA14160-17	HSA_CIRCpedia_47769	exon	FBXW7	-6.11603	0.000205102
chr21:17135210|17138460	hsa-USP25_0001	hsa_circ_0001178	hsa_circ_31658	hsa-circRNA5121-26	HSA_CIRCpedia_35061	exon	USP25	-6.14752	0.000205102
chr6:4891947|4892613	hsa-CDYL_0005	hsa_circ_0008285	hsa_circ_20406	hsa-circRNA6595-3	HSA_CIRCpedia_55226	exon	CDYL	-6.34309	0.0369525
chr1:7837220|7838229	hsa-VAMP3_0001	hsa_circ_0006354	hsa_circ_18051	hsa-circRNA36-3	HSA_CIRCpedia_32961	exon	VAMP3	-6.45502	0.0414903
chr2:202010101|202014558	hsa-CFLAR_0002	hsa_circ_0001092	hsa_circ_17904	hsa-circRNA4751-10	HSA_CIRCpedia_39151	exon	CFLAR	-6.62526	0.0414903
chr8:131164982|131193126	hsa-ASAP1_0002	hsa_circ_0008934	hsa_circ_09642	hsa-circRNA15613-7	HSA_CIRCpedia_60082	exon	ASAP1	-6.7964	0.0391185
chr14:23378692|23380612	hsa-RBM23_0007	hsa_circ_0000524	hsa_circ_14272	hsa-circRNA10380-4	HSA_CIRCpedia_11721	exon	RBM23	-7.07531	0.0439727
chr15:59204762|59209198	hsa-SLTM_0001	hsa_circ_0000605	hsa_circ_07014	hsa-circRNA10752-10	HSA_CIRCpedia_14911	exon	SLTM	-7.24027	0.000160568
chr1:117944808|117963271	hsa-MAN1A2_0003	hsa_circ_0000118	hsa_circ_02643	hsa-circRNA471-11	HSA_CIRCpedia_27486	exon	MAN1A2	-8.02501	9.88514e-05
chr4:144464662|144465125	hsa-SMARCA5_0005	hsa_circ_0001445	hsa_circ_06025	hsa-circRNA6130-12	HSA_CIRCpedia_47541	exon	SMARCA5	-8.88066	6.0813e-05
