# Supplementary material for: The landscape of circular RNA in preterm birth
Source: Front Immunol. 2022 Aug 22;13:879487. doi: 10.3389/fimmu.2022.879487 (PMC9441874; doi:10.3389/fimmu.2022.879487)
Supplement: Supplementary file 3 [file Table_2.xlsx]

## Sheet: Sheet1
Supplementary Table 2. DEC in maternal monocytes of PTB
Position	CircAtlas ID	CircBase ID	CircRNADb ID	Deepbase2 ID	Circpedia2 ID	CircRNA Type	Host Gene	Log2FC	Adj.P.Val
chr15:59204762|59209198	hsa-SLTM_0001	hsa_circ_0000605	hsa_circ_07014	hsa-circRNA10752-10	HSA_CIRCpedia_14911	exon	SLTM	2.48231	0.0022656
chr7:77200395|77221573	hsa-PTPN12_0003	hsa_circ_0008901	hsa_circ_22031	hsa-circRNA7132-44	HSA_CIRCpedia_59015	exon	PTPN12	2.21832	0.00392948
chr4:128995615|129003460	hsa-LARP1B_0002	hsa_circ_0007619	hsa_circ_05562	hsa-circRNA6114-11	HSA_CIRCpedia_47404	exon	LARP1B	2.17967	0.0125994
chr1:117944808|117957453	hsa-MAN1A2_0002	hsa_circ_0000117	hsa_circ_02600	hsa-circRNA471-33	HSA_CIRCpedia_27485	exon	MAN1A2	1.96736	0.0302846
chr3:160131261|160137331	hsa-SMC4_0016	-	-	-	HSA_CIRCpedia_40193	exon	SMC4	1.90219	0.00914065
chr19:55098668|55144769	hsa-LILRB1_0006	-	-	-	-	exon	LILRA1,CTB-83J4.2,AC009892.5,LILRB1,LILRA2	1.8879	1.13667e-05
chr1:67423742|67428843	hsa-MIER1_0001	-	hsa_circ_29080	hsa-circRNA337-2	HSA_CIRCpedia_32825	exon	MIER1	1.8172	0.0201096
chr11:5247868|5248284	-	hsa_circ_0140932	-	-	-	antisense	HBB	1.80432	5.55081e-05
chrX:76888695|76920267	hsa-ATRX_0001	hsa_circ_0091098	-	hsa-circRNA16173-11	HSA_CIRCpedia_66298	exon	ATRX	1.68164	0.0275268
chr2:113057426|113082774	hsa-ZC3H6_0008	-	hsa_circ_30564	hsa-circRNA4588-2	HSA_CIRCpedia_114121	exon	ZC3H6	1.63315	4.16685e-06
chr10:112723883|112745523	hsa-SHOC2_0002	hsa_circ_0020028	hsa_circ_07781	hsa-circRNA1108-9	HSA_CIRCpedia_392	exon	SHOC2	1.60832	2.88722e-05
chr12:72036216|72038098	hsa-ZFC3H1_0022	-	hsa_circ_19827	hsa-circRNA10028-7	HSA_CIRCpedia_9562	exon	ZFC3H1	1.57723	0.00833699
chr3:160129708|160134203	hsa-SMC4_0006	-	-	-	HSA_CIRCpedia_39580	exon	SMC4	1.52695	0.0336481
chr14:106092109|106208722	hsa-IGHG1_0001	-	-	-	-	exon	IGHG1,AL901608.1,ELK2AP,IGHGP,IGHA1,IGHEP1,RP11-731F5.2,IGHG2,IGHG4,AL928768.3	1.46502	2.77229e-05
chr6:7602856|7606428	hsa-SNRNP48_0001	hsa_circ_0001574	hsa_circ_31338	hsa-circRNA6606-1	HSA_CIRCpedia_55528	exon	SNRNP48	1.46354	0.000103354
chr9:5968019|5969436	hsa-KIAA2026_0001	-	-	-	HSA_CIRCpedia_68073	exon	KIAA2026	1.45348	0.0490223
chr7:128202369|128214845	hsa-RP11-274B21_0009	-	-	-	-	intron	RP11-274B21.1	1.45094	0.0336481
chr7:91700219|91715000	hsa-AKAP9_0107	-	hsa_circ_30390	hsa-circRNA7148-4	HSA_CIRCpedia_113606	exon	AKAP9	1.41811	2.95575e-05
chr11:5246873|5247941	-	-	-	-	-	exon	HBB	1.41015	2.77229e-05
chr15:93540187|93558139	hsa-CHD2_0119	hsa_circ_0036998	hsa_circ_00712	hsa-circRNA2740-18	HSA_CIRCpedia_16215	exon	CHD2	1.40672	3.451e-07
chr6:131466425|131490413	hsa-AKAP7_0001	-	hsa_circ_05190	hsa-circRNA6897-3	HSA_CIRCpedia_53532	exon	AKAP7	1.37363	6.7238e-06
chr1:117944808|117984947	hsa-MAN1A2_0008	hsa_circ_0000119	hsa_circ_29618	hsa-circRNA471-26	HSA_CIRCpedia_27487	exon	MAN1A2	1.35916	0.0276058
chr14:35269430|35280242	hsa-BAZ1A_0009	-	-	-	HSA_CIRCpedia_355968	exon	BAZ1A,AL355885.1	1.3188	0.0201096
chr1:44666214|44667351	hsa-intergenic_000212	-	-	-	-	intergenic		1.29692	4.00752e-05
chr5:149781498|149781687	hsa-CD74_0011	-	-	-	-	antisense	CD74	-1.01243	0.0253663
chr17:81042814|81043199	hsa-METRNL_0001	-	hsa_circ_09817	hsa-circRNA3582-1	HSA_CIRCpedia_22986	exon	METRNL	-1.02258	0.0159607
chr2:160605330|160615782	hsa-MARCH7_0028	-	-	-	-	exon	44627	-1.03	0.00623446
chr3:169694734|169702977	hsa-SEC62_0012	-	-	-	-	exon	SEC62	-1.03023	0.00120122
chr12:8546335|8549716	hsa-LINC00937_0002	-	-	-	-	intron	LINC00937	-1.04017	0.0336481
chr11:61734292|61734646	-	-	-	-	-	intron	FTH1	-1.08217	0.00540017
chr12:8549019|8549716	-	-	-	-	-	intron	LINC00937	-1.11599	0.0415686
chr11:5246919|5248013	-	-	-	-	-	antisense	HBB	-1.1481	0.0121888
chr4:113568355|113568705	hsa-LARP7_0001	-	-	-	HSA_CIRCpedia_118291	exon	LARP7	-1.15413	0.00853193
chr5:158621724|158630664	hsa-RNF145_0001	hsa_circ_0074828	-	hsa-circRNA14503-1	HSA_CIRCpedia_50975	exon	RNF145	-1.15602	0.00921709
chr1:150198940|150201570	hsa-ANP32E_0001	-	-	-	HSA_CIRCpedia_113915	exon	ANP32E	-1.28411	0.00185272
chr1:97839117|97848017	hsa-DPYD_0026	-	-	hsa-circRNA8618-25	HSA_CIRCpedia_33291	exon	DPYD	-1.31258	0.00128705
chr17:28505089|28506315	hsa-NSRP1_0003	-	-	-	HSA_CIRCpedia_356318	exon	NSRP1	-1.35428	0.00163129
chr5:149781493|149781702	hsa-CD74_0006	-	-	-	-	antisense	CD74	-1.36097	0.00268112
chr11:93399848|93402936	hsa-CEP295_0001	-	-	hsa-circRNA1510-40	HSA_CIRCpedia_66877	exon	KIAA1731	-1.48811	6.02504e-06
chr7:104719293|104731761	hsa-KMT2E_0030	-	-	hsa-circRNA7213-2	HSA_CIRCpedia_56160	exon	KMT2E	-1.56052	7.82576e-05
chr14:75202687|75203028	hsa-FCF1_0003	-	-	-	-	antisense	FCF1	-1.58662	0.000531013
chr1:235377084|235403766	hsa-ARID4B_0046	-	hsa_circ_05933	-	HSA_CIRCpedia_69321	exon	ARID4B	-1.62432	9.98428e-07
chr9:33986758|33989124	hsa-UBAP2_0010	-	-	-	HSA_CIRCpedia_160253	exon	UBAP2	-1.63028	9.98428e-07
chr3:53262072|53262344	hsa-TKT_0007	hsa_circ_0001311	hsa_circ_10070	hsa-circRNA13592-20	-	exon	TKT	-1.66897	0.00914065
chr7:26232907|26233218	hsa-HNRNPA2B1_0017	-	-	-	-	exon	HNRNPA2B1	-1.82879	0.00392948
chr13:115056964|115057267	hsa-UPF3A_0002	-	-	-	HSA_CIRCpedia_364372	exon	UPF3A	-1.84486	1.60038e-07
chr13:108895880|108903664	hsa-TNFSF13B_0001	hsa_circ_0000502	-	hsa-circRNA2183	-	intron	TNFSF13B	-1.91869	1.13869e-06
chr14:35777200|35778201	hsa-PSMA6_0003	-	-	hsa-circRNA2263-1	HSA_CIRCpedia_12047	exon	KIAA0391,PSMA6	-2.07144	4.16685e-06
chr1:235377084|235384977	hsa-ARID4B_0051	-	hsa_circ_18019	-	HSA_CIRCpedia_118336	exon	ARID4B	-2.2611	3.451e-07
chr16:29857209|29858706	hsa-MVP_0004	hsa_circ_0000689	hsa_circ_31917	hsa-circRNA2944-21	-	exon	MVP	-2.71857	2.15744e-08
chr1:16891302|16893846	-	hsa_circ_0010155	-	-	-	exon	NBPF1	-2.78333	0.000384085
