# Supplementary material for: The landscape of circular RNA in preterm birth
Source: Front Immunol. 2022 Aug 22;13:879487. doi: 10.3389/fimmu.2022.879487 (PMC9441874; doi:10.3389/fimmu.2022.879487)
Supplement: Supplementary file 4 [file Table_3.xlsx]

## Sheet: Sheet1
Supplementary Table 3. DEC in myometrium tissues of PTB
Position	CircAtlas ID	CircBase ID	CircRNADb ID	Deepbase2 ID	Circpedia2 ID	CircRNA Type	Host Gene	Log2FC	Adj.P.Val
chr10:30397716|30399760	hsa-KIAA1462_0003	-	-	hsa-circRNA895	-	antisense	KIAA1462	3.20481	7.78575e-06
chr2:113057426|113089859	hsa-ZC3H6_0021	-	-	-	-	exon	AC115115.2,ZC3H6	3.10244	9.3213e-06
chr7:134618658|134620516	hsa-CALD1_0009	-	-	-	-	exon	CALD1	2.99001	0.0053168
chr14:103209815|103210047	hsa-intergenic_000110	-	-	hsa-circRNA2443	-	intergenic		2.80572	2.87195e-05
chr1:171492360|171502100	hsa-PRRC2C_0023	hsa_circ_0015211	hsa_circ_20060	hsa-circRNA620-3	HSA_CIRCpedia_28699	exon	PRRC2C	2.13971	0.0133525
chr4:128998943|129003460	hsa-LARP1B_0018	-	-	-	HSA_CIRCpedia_103562	exon	LARP1B	1.92902	0.00639539
chr7:134618724|134620516	hsa-CALD1_0108	-	-	-	-	exon	CALD1	1.87582	0.0362012
chr2:97866071|97873743	hsa-ANKRD36_0002	-	hsa_circ_28479	-	HSA_CIRCpedia_122512	exon	ANKRD36	1.85146	0.0273533
chr10:105199503|105200607	hsa-PDCD11_0003	hsa_circ_0003366	hsa_circ_16056	hsa-circRNA1090-42	HSA_CIRCpedia_309	exon	PDCD11	1.81388	0.0133525
chr19:40368303|40384167	hsa-FCGBP_0002	-	hsa_circ_19018	-	HSA_CIRCpedia_348989	exon	FCGBP	1.74506	0.0155145
chr9:128103456|128109220	hsa-GAPVD1_0036	hsa_circ_0005249	hsa_circ_11303	hsa-circRNA7799-9	HSA_CIRCpedia_62821	exon	GAPVD1	1.62513	0.0370708
chr8:98703180|98731417	hsa-MTDH_0005	-	-	hsa-circRNA7515-14	HSA_CIRCpedia_89485	exon	MTDH	1.61907	0.0370708
chrX:76872081|76920267	hsa-ATRX_0005	-	-	-	HSA_CIRCpedia_142066	exon	ATRX	1.59949	0.0370708
chr9:35685644|35689241	hsa-TPM2_0004	-	-	-	-	exon	TPM2	1.5317	0.0465192
chrX:76888695|76912143	hsa-ATRX_0053	-	-	-	HSA_CIRCpedia_66297	exon	ATRX	1.52522	0.0481034
chr1:201869379|201869567	hsa-LMOD1_0002	-	-	-	-	exon	LMOD1	1.45145	0.0465192
chr1:117944808|117984947	hsa-MAN1A2_0008	hsa_circ_0000119	hsa_circ_29618	hsa-circRNA471-26	HSA_CIRCpedia_27487	exon	MAN1A2	1.09887	0.0102495
chr10:22193451|22209892	hsa-DNAJC1_0001	hsa_circ_0004306	hsa_circ_32673	hsa-circRNA9077-8	HSA_CIRCpedia_1228	exon	DNAJC1	-1.46684	0.0370708
chr7:77378741|77394949	hsa-RSBN1L_0006	-	hsa_circ_25285	-	HSA_CIRCpedia_68284	exon	RSBN1L	-1.51703	0.0478394
chr2:170505692|170531550	hsa-CCDC173_0001	-	hsa_circ_01594	-	HSA_CIRCpedia_117927	exon	CCDC173,AC016772.4	-1.53534	0.0465192
chr19:8520289|8528570	hsa-HNRNPM_0009	hsa_circ_0006382	hsa_circ_20744	hsa-circRNA3838-2	HSA_CIRCpedia_26878	exon	HNRNPM	-1.60867	0.0370708
chr11:77394755|77404656	hsa-RSF1_0023	hsa_circ_0000344	hsa_circ_16062	hsa-circRNA9637-13	HSA_CIRCpedia_5717	exon	RSF1	-1.74126	0.0289955
chr7:158662546|158684024	hsa-WDR60_0010	-	-	hsa-circRNA7335-16	HSA_CIRCpedia_115701	exon	WDR60	-1.76442	0.0134438
chrX:76854880|76856033	hsa-ATRX_0025	hsa_circ_0001931	hsa_circ_00898	hsa-circRNA16173-8	HSA_CIRCpedia_94758	exon	ATRX	-1.77862	0.0133525
chr9:33986758|34017187	hsa-UBAP2_0005	hsa_circ_0086735	hsa_circ_04513	hsa-circRNA15725-72	HSA_CIRCpedia_63948	exon	UBAP2	-1.8721	0.0155145
chr1:235377084|235384977	hsa-ARID4B_0051	-	hsa_circ_18019	-	HSA_CIRCpedia_118336	exon	ARID4B	-1.88306	0.0143911
chr11:110118428|110124834	hsa-RDX_0022	-	-	hsa-circRNA9700-2	HSA_CIRCpedia_113162	exon	RDX	-2.02235	0.0133525
chr11:77386081|77404656	hsa-RSF1_0015	hsa_circ_0023701	hsa_circ_02564	hsa-circRNA9637-2	HSA_CIRCpedia_5714	exon	RSF1	-2.14668	0.00540192
chr7:32969690|33139048	hsa-RP9_0002	-	-	-	-	exon	RP9,AC074338.4,RNU6-388P,NT5C3A,RP9P,RN7SL505P	-2.39965	0.000347334
chr7:134618504|134618666	hsa-CALD1_0081	-	-	-	-	exon	CALD1	-2.87679	0.00013715
chr10:95436410|95447206	hsa-FRA10AC1_0001	-	hsa_circ_17660	-	HSA_CIRCpedia_355215	exon	FRA10AC1	-3.1979	2.87195e-05
