# Supplementary material for: The landscape of circular RNA in preterm birth
Source: Front Immunol. 2022 Aug 22;13:879487. doi: 10.3389/fimmu.2022.879487 (PMC9441874; doi:10.3389/fimmu.2022.879487)
Supplement: Supplementary file 5 [file Table_4.xlsx]

## Sheet: Sheet1
Supplementary Table 4. DEC in chorion of PTB
Position	CircAtlas ID	CircBase ID	CircRNADb ID	Deepbase2 ID	Circpedia2 ID	CircRNA Type	Host Gene	Log2FC	Adj.P.Val
chr12:56119354|56119668	hsa-CD63_0002	-	-	-	-	exon	CD63	3.53019	0.00143406
chr7:100781882|100782026	chr7:101138601|101138745	-	-	-	-	antisense	SERPINE1	3.31755	0.00402926
chr17:48266138|48266352	hsa-COL1A1_0067	-	-	-	-	exon	COL1A1	2.79613	0.00194011
chr11:5269706|5275635	hsa-HBG2_0003	-	-	-	-	exon	HBG2,HBG1	2.39479	0.000450804
chr14:94845914|94847266	hsa-SERPINA1_0004	-	-	-	-	antisense	SERPINA1	2.39479	0.000450804
chr2:216226775|216229677	-	-	-	-	-	antisense	FN1	-1.23505	0.00402926
chr2:216274294|216274462	-	-	-	-	-	exon	FN1	-1.23505	0.00402926
chr3:13670664|13671445	hsa-FBLN2_0004	-	hsa_circ_31666	-	HSA_CIRCpedia_357804	exon	FBLN2	-1.24047	0.0092343
chr1:160182900|160183055	hsa-PEA15_0001	hsa_circ_0014866	hsa_circ_03866	hsa-circRNA580-4	HSA_CIRCpedia_28404	exon	PEA15	-1.3009	0.00201927
chr14:77940765|77940926	-	-	-	-	-	antisense	ISM2	-1.32705	0.00146498
chr22:33245453|33253302	chr22:32849466|32857315	-	-	-	-	exon	TIMP3	-1.32705	0.00146498
chr5:179151745|179153725	-	-	-	-	-	exon	CANX	-1.32705	0.00146498
chr8:134260963|134262711	-	-	-	-	-	antisense	NDRG1	-1.32705	0.00146498
chr3:165208984|165229439	hsa-LINC01322_0001	-	-	-	HSA_CIRCpedia_343732	intron	RP11-85M11.2	-1.33536	0.00188329
chr13:99171497|99171727	hsa-STK24_0001	-	-	hsa-circRNA10334-1	HSA_CIRCpedia_11321	exon	STK24	-1.34563	0.00146498
chr2:216240402|216241366	-	-	-	-	-	antisense	FN1	-1.35101	0.00146498
chr3:100508301|100511601	-	-	-	-	-	antisense	ABI3BP	-1.3541	0.00146498
chr2:216285493|216286875	-	-	-	-	-	exon	FN1	-1.36451	0.00146498
chr7:38282029|38299831	hsa-TRGC1_0001	-	-	-	-	exon	TRGJP2,TRGC2,TRGJ2,TRGC1	-1.56599	0.0494296
chr2:216238045|216256537	hsa-FN1_0008	hsa_circ_0058092	hsa_circ_26409	hsa-circRNA12872-91	HSA_CIRCpedia_39600	exon	FN1	-1.5684	0.0262204
chr15:63354445|63354844	hsa-TPM1_0003	-	-	-	-	exon	TPM1	-1.88812	0.02158
chr11:2152684|2152841	chr11:2131454|2131611	-	-	-	-	antisense	IGF2	-2.01457	0.0360089
chr11:2018108|2018264	-	-	-	-	-	antisense	H19	-2.02022	0.0435861
chr2:36623757|36623930	hsa-CRIM1_0005	hsa_circ_0002017	hsa_circ_12294	hsa-circRNA4396-8	HSA_CIRCpedia_41041	exon	CRIM1	-2.04892	0.0207535
chr11:2152684|2152843	chr11:2131454|2131613	-	-	-	-	antisense	IGF2	-2.28761	0.0310398
chr13:29041040|29041754	hsa-FLT1_0001	-	hsa_circ_29482	-	HSA_CIRCpedia_10498	exon	FLT1	-2.41846	0.016148
chr5:74014782|74016326	hsa-HEXB_0018	-	-	-	-	antisense	HEXB	-2.46795	0.00188329
chr15:39882750|39883423	hsa-THBS1_0001	-	-	-	-	exon	THBS1	-2.53128	0.0210149
