# Supplementary material for: The landscape of circular RNA in preterm birth
Source: Front Immunol. 2022 Aug 22;13:879487. doi: 10.3389/fimmu.2022.879487 (PMC9441874; doi:10.3389/fimmu.2022.879487)
Supplement: Supplementary file 6 [file Table_5.xlsx]

## Sheet: Sheet1
Supplementary Table 5. DEC in placenta of PTB
Position	CircAtlas ID	CircBase ID	CircRNADb ID	Deepbase2 ID	Circpedia2 ID	CircRNA Type	Host Gene	Log2FC	Adj.P.Val
chrX:130498723|130503026	hsa-IGSF1_0001	-	hsa_circ_20795	hsa-circRNA16239-2	HSA_CIRCpedia_65217	exon	IGSF1	2.27132	4.15881e-05
chr11:34978931|34999729	hsa-PDHX_0017	hsa_circ_0021712	hsa_circ_26059	hsa-circRNA1290-8	HSA_CIRCpedia_4218	exon	PDHX	2.04683	0.00306725
chr2:68717322|68772444	hsa-APLF_0001	hsa_circ_0001023	hsa_circ_15562	hsa-circRNA4471-17	HSA_CIRCpedia_42100	exon	APLF	2.03334	0.00232314
chr5:109049221|109065214	hsa-MAN2A1_0001	hsa_circ_0001519	hsa_circ_24011	hsa-circRNA6380-39	HSA_CIRCpedia_49797	exon	MAN2A1	2.01484	0.00305325
chr1:22047529|22048257	hsa-USP48_0026	hsa_circ_0004808	hsa_circ_09921	hsa-circRNA8352-4	HSA_CIRCpedia_30107	exon	USP48	2.00232	4.96987e-05
chr8:131226802|131249240	hsa-ASAP1_0001	hsa_circ_0085611	-	hsa-circRNA15613-80	HSA_CIRCpedia_60092	exon	ASAP1	1.99285	1.68408e-05
chr9:110062422|110074018	hsa-RAD23B_0001	hsa_circ_0008812	hsa_circ_22142	hsa-circRNA7761-16	HSA_CIRCpedia_62130	exon	RAD23B	1.99106	0.0024462
chr4:107092252|107133992	hsa-TBCK_0003	hsa_circ_0007540	hsa_circ_27092	hsa-circRNA14096-40	HSA_CIRCpedia_47069	exon	TBCK	1.94445	0.00138885
chr9:33960824|33973235	hsa-UBAP2_0001	hsa_circ_0001850	hsa_circ_17080	hsa-circRNA15725-26	HSA_CIRCpedia_63939	exon	OSTCP8,UBAP2	1.94312	0.00564016
chr5:80071513|80088663	hsa-MSH3_0011	hsa_circ_0001508	hsa_circ_14013	hsa-circRNA6344-9	HSA_CIRCpedia_52812	exon	MSH3	1.93469	0.000755444
chr13:21619824|21620369	hsa-LATS2_0003	hsa_circ_0029693	hsa_circ_24874	hsa-circRNA10220-6	HSA_CIRCpedia_10331	exon	LATS2	1.89629	7.94628e-06
chr12:50821545|50855130	hsa-LARP4_0024	hsa_circ_0026230	hsa_circ_08214	hsa-circRNA1767-17	HSA_CIRCpedia_8683	exon	LARP4	1.80622	0.00808928
chr3:119219542|119236162	hsa-TIMMDC1_0003	hsa_circ_0066874	hsa_circ_28851	hsa-circRNA5681-4	HSA_CIRCpedia_43070	exon	TIMMDC1	1.78116	0.0108622
chr9:74305008|74313120	hsa-TMEM2_0011	-	-	hsa-circRNA15781-12	HSA_CIRCpedia_64383	exon	TMEM2	1.77981	0.000122969
chr4:39900009|39904080	hsa-PDS5A_0019	hsa_circ_0001405	hsa_circ_22654	hsa-circRNA13986-44	HSA_CIRCpedia_48581	exon	PDS5A	1.75868	7.2472e-05
chr9:115024715|115060196	hsa-PTBP3_0001	hsa_circ_0008192	hsa_circ_27809	hsa-circRNA15883-26	HSA_CIRCpedia_62347	exon	RN7SL430P,RP11-165N19.4,PTBP3	1.75631	0.000929104
chr11:77330651|77340944	hsa-CLNS1A_0002	hsa_circ_0008342	hsa_circ_27173	hsa-circRNA9636-15	HSA_CIRCpedia_5705	exon	CLNS1A	1.73337	0.0163539
chr10:93579027|93582119	hsa-TNKS2_0016	-	-	hsa-circRNA1027-2	HSA_CIRCpedia_2708	exon	TNKS2	1.72359	0.000369702
chr8:62531537|62557191	hsa-AC090094_0017	-	hsa_circ_27625	hsa-circRNA15506-14	HSA_CIRCpedia_61432	exon	ASPH,RN7SKP97	1.72289	0.000327031
chr13:99890681|99896878	hsa-UBAC2_0001	hsa_circ_0030720	hsa_circ_16938	hsa-circRNA2176-4	HSA_CIRCpedia_11345	exon	UBAC2	1.72251	0.00959368
chr7:40027198|40027857	hsa-CDK13_0005	hsa_circ_0079929	hsa_circ_26832	hsa-circRNA7051-14	HSA_CIRCpedia_58024	exon	CDK13	1.71443	0.0168422
chr10:27453993|27454468	hsa-MASTL_0005	hsa_circ_0000225	hsa_circ_02687	hsa-circRNA888-9	HSA_CIRCpedia_1356	exon	MASTL	1.69921	0.000327031
chr1:167988783|167992285	hsa-DCAF6_0008	-	-	-	-	exon	DCAF6	1.68682	0.000147238
chrX:14868627|14877456	hsa-FANCB_0002	hsa_circ_0006971	hsa_circ_29110	hsa-circRNA16050-6	HSA_CIRCpedia_65324	exon	FANCB	1.6762	0.000202623
chr8:124346118|124348772	hsa-ATAD2_0013	hsa_circ_0085458	hsa_circ_08817	hsa-circRNA15598-2	HSA_CIRCpedia_59972	exon	ATAD2	1.67199	1.03223e-05
chr14:100380516|100381034	hsa-EML1_0003	-	hsa_circ_06971	hsa-circRNA2428-9	HSA_CIRCpedia_11361	exon	EML1	1.67195	0.000257173
chr4:148860976|148887990	hsa-ARHGAP10_0004	hsa_circ_0007265	hsa_circ_20492	hsa-circRNA6139-37	HSA_CIRCpedia_47615	exon	ARHGAP10	1.66188	1.03223e-05
chr9:99284788|99327765	hsa-CDC14B_0001	hsa_circ_0087641	hsa_circ_10939	hsa-circRNA15841-15	HSA_CIRCpedia_64846	exon	CDC14B	1.63225	0.000457962
chr6:3410422|3416089	hsa-SLC22A23_0001	hsa_circ_0075504	hsa_circ_29747	hsa-circRNA14580-3	HSA_CIRCpedia_54791	exon	SLC22A23	1.63154	0.0010195
chr21:16225595|16230029	hsa-AF127936_0001	hsa_circ_0003151	-	hsa-circRNA13149-2	HSA_CIRCpedia_35055	exon	AF127936.7	1.62328	0.0292174
chr1:29313943|29314417	hsa-EPB41_0001	hsa_circ_0011167	hsa_circ_21075	hsa-circRNA173-7	HSA_CIRCpedia_31252	exon	EPB41	1.61908	0.000493163
chr12:28408514|28460682	hsa-CCDC91_0046	-	-	hsa-circRNA1724-15	HSA_CIRCpedia_8162	exon	CCDC91	1.61734	0.0163975
chr14:73614503|73640415	hsa-PSEN1_0004	hsa_circ_0002564	hsa_circ_30926	hsa-circRNA2361-11	HSA_CIRCpedia_12977	exon	PSEN1	1.61383	0.00794965
chr15:41648237|41669502	hsa-NUSAP1_0005	hsa_circ_0008346	hsa_circ_14097	hsa-circRNA2536-15	HSA_CIRCpedia_14216	exon	NUSAP1	1.61199	6.56328e-05
chr7:32852369|32860353	hsa-DPY19L1P2_0001	hsa_circ_0005885	-	hsa-circRNA7036-40	HSA_CIRCpedia_57894	exon	AVL9,DPY19L1P2	1.60406	0.00229878
chr12:46254584|46287504	hsa-ARID2_0002	hsa_circ_0025960	-	hsa-circRNA1747-14	HSA_CIRCpedia_8474	exon	ARID2,RN7SL246P	1.6038	0.000257173
chr2:99802640|99812219	hsa-RP11-111H13_0001	hsa_circ_0001051	hsa_circ_00970	hsa-circRNA4557-9	HSA_CIRCpedia_42778	exon	MRPL30,MRPL30,C2orf15	1.59601	0.0263008
chr12:133768075|133768589	hsa-ZNF268_0001	hsa_circ_0029596	hsa_circ_06009	hsa-circRNA2072-3	HSA_CIRCpedia_7816	exon	CTD-2140B24.4,ZNF268	1.59174	0.00292135
chr4:39328183|39329376	hsa-RFC1_0002	hsa_circ_0001403	hsa_circ_17016	hsa-circRNA13981-15	HSA_CIRCpedia_48531	exon	RFC1	1.58781	0.00139911
chr13:113170754|113181798	hsa-TUBGCP3_0001	hsa_circ_0000504	hsa_circ_06318	hsa-circRNA10351-23	HSA_CIRCpedia_10108	exon	TUBGCP3	1.58776	0.00159609
chr20:33057853|33069011	hsa-AL109923_0079	hsa_circ_0005868	hsa_circ_06467	hsa-circRNA4986-9	HSA_CIRCpedia_33813	exon	ITCH	1.58713	0.00807051
chr2:36691677|36706837	hsa-CRIM1_0009	hsa_circ_0002729	hsa_circ_14754	hsa-circRNA4396-41	HSA_CIRCpedia_41057	exon	CRIM1	1.58128	5.22866e-05
chr15:76566753|76578822	hsa-ETFA_0005	hsa_circ_0036398	hsa_circ_06332	hsa-circRNA10836-18	HSA_CIRCpedia_15741	exon	ETFA	1.57996	0.000563972
chr9:75303625|75315559	hsa-TMC1_0002	-	-	-	HSA_CIRCpedia_176387	exon	TMC1	1.57547	0.000191583
chr7:17885218|17890587	hsa-SNX13_0008	hsa_circ_0005535	hsa_circ_13045	hsa-circRNA15046-27	HSA_CIRCpedia_57538	exon	SNX13	1.57314	0.000142348
chr12:69983265|69987393	hsa-CCT2_0003	hsa_circ_0002940	hsa_circ_24568	hsa-circRNA1880-3	HSA_CIRCpedia_9493	exon	CCT2	1.57231	0.0229004
chr19:53122189|53138406	hsa-ZNF83_0001	-	hsa_circ_01583	hsa-circRNA12331-1	HSA_CIRCpedia_26569	exon	ZNF83	1.56181	0.0412673
chr20:1433138|1438919	hsa-NSFL1C_0003	-	hsa_circ_21028	hsa-circRNA12957-1	HSA_CIRCpedia_95276	exon	NSFL1C	1.55131	0.00138888
chr9:138758302|138774924	hsa-CAMSAP1_0002	hsa_circ_0006814	hsa_circ_13865	hsa-circRNA15984-2	HSA_CIRCpedia_63396	exon	CAMSAP1	1.55047	0.0172826
chr3:41265512|41268843	hsa-CTNNB1_0003	hsa_circ_0004194	hsa_circ_05331	hsa-circRNA5521-12	HSA_CIRCpedia_45584	exon	CTNNB1	1.54731	0.00161505
chr5:131013396|131044965	hsa-FNIP1_0031	hsa_circ_0001524	hsa_circ_11228	hsa-circRNA14404-41	HSA_CIRCpedia_50121	exon	CTC-432M15.3,FNIP1	1.54646	0.000618744
chr10:50708584|50714058	hsa-ERCC6_0004	hsa_circ_0018331	hsa_circ_10737	hsa-circRNA9127-3	HSA_CIRCpedia_1756	exon	ERCC6	1.54421	0.00328504
chr21:34793787|34805178	hsa-IFNGR2_0002	hsa_circ_0002113	hsa_circ_23991	hsa-circRNA5140-3	HSA_CIRCpedia_35277	exon	IFNGR2	1.54312	0.0010437
chr4:83891480|83900159	hsa-LIN54_0003	hsa_circ_0003148	hsa_circ_26104	hsa-circRNA14049-15	HSA_CIRCpedia_49327	exon	LIN54	1.53795	7.2472e-05
chr12:2929252|2930958	hsa-ITFG2_0001	hsa_circ_0000374	hsa_circ_06308	hsa-circRNA1633-9	HSA_CIRCpedia_8179	exon	ITFG2	1.53555	0.00690581
chr3:196214270|196215554	hsa-RNF168_0001	-	hsa_circ_02590	hsa-circRNA13891-2	HSA_CIRCpedia_45037	exon	RNF168	1.52957	0.000489195
chr16:47001425|47002076	hsa-DNAJA2_0003	hsa_circ_0000696	hsa_circ_05132	hsa-circRNA11089-1	HSA_CIRCpedia_17643	exon	DNAJA2	1.52639	0.000397664
chr11:18566170|18588029	hsa-UEVLD_0001	-	-	hsa-circRNA9436-14	HSA_CIRCpedia_3936	exon	UEVLD	1.51356	0.00121103
chr19:11446123|11446459	hsa-RAB3D_0003	-	hsa_circ_04113	hsa-circRNA11996-5	HSA_CIRCpedia_24745	exon	RAB3D	1.51204	0.00394055
chr10:7409611|7423911	hsa-SFMBT2_0032	hsa_circ_0017648	hsa_circ_18847	hsa-circRNA9043-4	HSA_CIRCpedia_2297	exon	SFMBT2	1.51193	0.000251961
chr13:26911704|26928017	hsa-CDK8_0001	hsa_circ_0029803	hsa_circ_08876	hsa-circRNA2084-7	HSA_CIRCpedia_10446	exon	CDK8	1.50761	0.0108622
chr6:151669846|151674887	hsa-AKAP12_0001	hsa_circ_0078299	hsa_circ_12210	hsa-circRNA6937	HSA_CIRCpedia_53956	exon	AKAP12	1.50327	0.000461594
chr20:13251151|13273110	hsa-ISM1_0003	-	-	-	HSA_CIRCpedia_152954	exon	ISM1	1.49722	0.000251961
chr9:33960824|33963789	hsa-UBAP2_0076	hsa_circ_0001849	hsa_circ_21097	hsa-circRNA15725-27	HSA_CIRCpedia_63938	exon	UBAP2	1.48565	0.000202623
chr11:122646927|122647918	hsa-UBASH3B_0005	hsa_circ_0003391	hsa_circ_14890	hsa-circRNA1585-12	HSA_CIRCpedia_3560	exon	UBASH3B	1.4855	0.0357481
chrX:149761067|149787612	hsa-MTM1_0027	-	hsa_circ_09607	hsa-circRNA8168-6	HSA_CIRCpedia_65337	exon	MTM1	1.47813	0.000834186
chr6:82923944|82924546	hsa-IBTK_0034	-	hsa_circ_30439	hsa-circRNA14816-2	HSA_CIRCpedia_55619	exon	IBTK	1.47047	0.0302866
chr8:101299729|101300495	hsa-RNF19A_0002	hsa_circ_0085128	hsa_circ_31552	hsa-circRNA15562-12	HSA_CIRCpedia_59632	exon	RNF19A	1.46608	0.00414981
chr7:91842509|91855996	hsa-KRIT1_0001	hsa_circ_0081006	hsa_circ_12099	hsa-circRNA15199-5	HSA_CIRCpedia_59270	exon	KRIT1	1.46563	0.0190039
chr14:62188227|62188541	hsa-HIF1A_0009	hsa_circ_0007976	hsa_circ_31630	hsa-circRNA2324-7	HSA_CIRCpedia_12581	exon	HIF1A	1.46391	0.0169343
chr14:23395342|23396869	hsa-PRMT5_0001	hsa_circ_0002928	hsa_circ_29131	hsa-circRNA10381-11	HSA_CIRCpedia_11727	exon	PRMT5	1.46249	0.0313929
chr15:85081763|85098301	hsa-UBE2Q2P1_0003	-	-	hsa-circRNA10871-2	HSA_CIRCpedia_15928	exon	UBE2Q2P1	1.46107	0.0265236
chr21:45165960|45168961	hsa-PDXK_0001	hsa_circ_0008021	hsa_circ_13715	hsa-circRNA5171-3	HSA_CIRCpedia_35657	exon	PDXK	1.45326	0.0144351
chr14:104245082|104263855	hsa-PPP1R13B_0001	hsa_circ_0005791	hsa_circ_07278	hsa-circRNA10594-3	HSA_CIRCpedia_11564	exon	SNORD51,PPP1R13B	1.45121	0.0383948
chr5:127854966|127866386	hsa-FBN2_0002	hsa_circ_0073806	-	hsa-circRNA14400-39	HSA_CIRCpedia_50061	exon	FBN2	1.44138	0.0240691
chr10:882343|890995	hsa-LARP4B_0003	hsa_circ_0008837	hsa_circ_01511	hsa-circRNA9027-31	HSA_CIRCpedia_2614	exon	LARP4B	1.43683	0.000693955
chr12:1136914|1137738	hsa-ERC1_0031	hsa_circ_0000373	hsa_circ_22854	hsa-circRNA1626-27	HSA_CIRCpedia_6893	exon	ERC1	1.42828	0.0315223
chr11:18305342|18307006	hsa-HPS5_0034	hsa_circ_0007484	hsa_circ_32594	hsa-circRNA9434-19	HSA_CIRCpedia_3899	exon	HPS5	1.42523	0.0225796
chr9:88284400|88327481	hsa-AGTPBP1_0001	hsa_circ_0087391	hsa_circ_08531	hsa-circRNA15808-18	HSA_CIRCpedia_64576	exon	AGTPBP1	1.4221	0.0268463
chr5:75993812|75997038	hsa-IQGAP2_0022	-	-	hsa-circRNA6328-4	HSA_CIRCpedia_52637	exon	IQGAP2	1.4201	0.0154438
chrX:149807416|149818374	hsa-MTM1_0007	-	hsa_circ_16564	-	HSA_CIRCpedia_65340	exon	MTM1	1.41865	0.000822639
chr6:149893421|149903739	hsa-GINM1_0004	-	hsa_circ_04827	hsa-circRNA6930-2	HSA_CIRCpedia_53871	exon	GINM1	1.41853	0.0232722
chr7:104702611|104707254	hsa-KMT2E_0001	hsa_circ_0081813	hsa_circ_17857	hsa-circRNA7213-33	HSA_CIRCpedia_56150	exon	KMT2E	1.41661	0.000202623
chr8:6582391|6605349	hsa-AGPAT5_0006	hsa_circ_0002682	hsa_circ_29052	hsa-circRNA7345-8	HSA_CIRCpedia_61459	exon	MIR4659B,AGPAT5	1.41469	0.00118212
chr10:13705453|13712528	hsa-FRMD4A_0016	hsa_circ_0017819	hsa_circ_09737	hsa-circRNA9055-29	HSA_CIRCpedia_1066	exon	FRMD4A	1.40654	0.0111724
chr2:242572332|242573494	hsa-THAP4_0001	hsa_circ_0007647	hsa_circ_23349	hsa-circRNA12947-9	HSA_CIRCpedia_40386	exon	THAP4	1.40526	0.0156546
chr5:72354260|72373320	hsa-FCHO2_0068	hsa_circ_0003571	hsa_circ_27723	hsa-circRNA6314-36	HSA_CIRCpedia_52510	exon	FCHO2	1.40395	0.0385676
chr3:196842798|196846401	hsa-DLG1_0002	hsa_circ_0001383	hsa_circ_02195	hsa-circRNA13897-13	HSA_CIRCpedia_45087	exon	DLG1	1.40394	0.0330546
chr2:197777606|197786910	hsa-PGAP1_0043	hsa_circ_0057608	hsa_circ_16023	hsa-circRNA12826-7	HSA_CIRCpedia_39018	exon	PGAP1	1.40341	0.00138888
chr7:27824782|27839709	hsa-TAX1BP1_0008	-	hsa_circ_32083	hsa-circRNA7019-4	HSA_CIRCpedia_57782	exon	TAX1BP1	1.38991	0.0488123
chr5:38496484|38530768	hsa-LIFR_0001	hsa_circ_0072305	hsa_circ_13406	hsa-circRNA14266-13	HSA_CIRCpedia_51792	exon	LIFR	1.38616	0.0119776
chr3:107429299|107451870	hsa-BBX_0002	hsa_circ_0001325	hsa_circ_12154	hsa-circRNA5661-9	HSA_CIRCpedia_42909	exon	BBX	1.38395	0.0377985
chr13:42040959|42042974	hsa-RGCC_0001	-	-	hsa-circRNA2116	HSA_CIRCpedia_10714	exon	RGCC	1.38181	0.0450409
chr6:76412361|76421132	hsa-SENP6_0016	hsa_circ_0077096	hsa_circ_19452	hsa-circRNA6813-41	HSA_CIRCpedia_55556	exon	SENP6	1.38034	0.0198974
chr11:68363565|68370960	hsa-PPP6R3_0108	hsa_circ_0008391	hsa_circ_29651	hsa-circRNA1458-52	HSA_CIRCpedia_5343	exon	PPP6R3	1.37939	0.00308037
chr1:46032241|46032692	hsa-AKR1A1_0002	hsa_circ_0000067	hsa_circ_29404	hsa-circRNA273-17	HSA_CIRCpedia_32083	exon	AKR1A1	1.37105	0.02592
chr9:97686268|97718297	hsa-C9orf3_0003	-	hsa_circ_29532	hsa-circRNA7727-11	HSA_CIRCpedia_64771	exon	C9orf3	1.36995	0.000223145
chr17:25630393|25637200	hsa-WSB1_0017	hsa_circ_0042496	hsa_circ_15834	hsa-circRNA3287-3	HSA_CIRCpedia_19791	exon	WSB1	1.36833	0.0359065
chr18:59805476|59815571	hsa-PIGN_0001	-	-	hsa-circRNA11830-27	HSA_CIRCpedia_24139	exon	PIGN	1.36794	0.0125568
chr12:1225032|1299218	hsa-ERC1_0006	-	-	-	HSA_CIRCpedia_7260	exon	ERC1	1.36673	0.00540562
chr12:56997143|56999111	hsa-BAZ2A_0002	hsa_circ_0004843	hsa_circ_19854	hsa-circRNA9992-8	HSA_CIRCpedia_9086	exon	BAZ2A	1.36604	0.000470441
chr1:51868107|51874004	hsa-EPS15_0014	hsa_circ_0005567	hsa_circ_31574	hsa-circRNA8505-49	HSA_CIRCpedia_32260	exon	EPS15	1.36532	0.0343267
chr2:216238045|216256537	hsa-FN1_0008	hsa_circ_0058092	hsa_circ_26409	hsa-circRNA12872-91	HSA_CIRCpedia_39600	exon	FN1	1.3625	0.0247623
chr18:48189459|48190874	hsa-MAPK4_0001	hsa_circ_0047688	hsa_circ_08375	hsa-circRNA3674	HSA_CIRCpedia_23957	exon	MAPK4	1.36157	0.00196977
chr17:58342773|58372162	hsa-USP32_0064	hsa_circ_0044949	hsa_circ_18760	hsa-circRNA11592-36	HSA_CIRCpedia_21724	exon	USP32	1.36079	0.000344031
chr5:138117612|138119061	hsa-CTNNA1_0005	hsa_circ_0074158	-	hsa-circRNA6456-22	HSA_CIRCpedia_50440	exon	CTNNA1	1.36035	0.00606359
chr1:215749244|215752480	hsa-KCTD3_0006	hsa_circ_0000184	hsa_circ_15107	hsa-circRNA746-15	HSA_CIRCpedia_30007	exon	KCTD3	1.35877	0.0374616
chr5:80063752|80088663	hsa-MSH3_0012	hsa_circ_0073177	hsa_circ_15317	hsa-circRNA6344-23	HSA_CIRCpedia_52808	exon	MSH3	1.35713	0.000945607
chr19:34685383|34712643	hsa-LSM14A_0003	hsa_circ_0050459	hsa_circ_12863	hsa-circRNA4008-11	HSA_CIRCpedia_25536	exon	LSM14A	1.35527	0.00270107
chr5:56526673|56527148	hsa-GPBP1_0006	hsa_circ_0001486	hsa_circ_31283	hsa-circRNA6276-10	HSA_CIRCpedia_52015	exon	GPBP1	1.35453	0.0320912
chr6:15615498|15638035	hsa-DTNBP1_0002	hsa_circ_0008418	hsa_circ_14515	hsa-circRNA14603-2	HSA_CIRCpedia_54082	exon	DTNBP1	1.35133	0.0175308
chr14:105718844|105739231	hsa-BRF1_0001	hsa_circ_0005309	hsa_circ_13951	hsa-circRNA10602-6	HSA_CIRCpedia_11598	exon	BRF1	1.34609	0.0105676
chr2:201283973|201284219	hsa-SPATS2L_0016	hsa_circ_0003071	hsa_circ_04851	hsa-circRNA4746-3	HSA_CIRCpedia_39088	exon	SPATS2L	1.3419	0.0239348
chr6:144086398|144110047	hsa-PHACTR2_0007	hsa_circ_0078058	-	hsa-circRNA6920-6	HSA_CIRCpedia_53754	exon	PHACTR2	1.34157	0.0211041
chr9:125616231|125618157	hsa-RC3H2_0008	hsa_circ_0088369	-	hsa-circRNA15916-42	HSA_CIRCpedia_62595	exon	RC3H2	1.3401	0.00022229
chr14:21698478|21702388	hsa-HNRNPC_0001	hsa_circ_0003643	hsa_circ_18300	hsa-circRNA10372-1	HSA_CIRCpedia_11667	exon	HNRNPC	1.33971	0.0442411
chr1:151139410|151139890	hsa-SCNM1_0001	hsa_circ_0000128	hsa_circ_22177	hsa-circRNA507-2	HSA_CIRCpedia_27910	exon	SCNM1	1.33929	0.0415907
chr8:101721361|101725409	hsa-PABPC1_0003	hsa_circ_0008496	hsa_circ_08808	hsa-circRNA15564-1	HSA_CIRCpedia_59652	exon	PABPC1	1.33588	0.0167696
chr14:96118434|96137824	hsa-TCL6_0001	-	-	-	-	exon	RP11-1070N10.6,TCL6	1.33527	0.0452207
chr7:66458204|66459328	hsa-SBDS_0002	hsa_circ_0003203	hsa_circ_09315	hsa-circRNA15156-8	HSA_CIRCpedia_58597	exon	SBDS	1.33518	0.0374616
chr4:905461|907456	hsa-GAK_0002	hsa_circ_0005830	hsa_circ_08088	hsa-circRNA13908-10	HSA_CIRCpedia_49590	exon	GAK	1.33434	0.0053203
chr15:64410316|64411053	hsa-SNX1_0003	hsa_circ_0000614	hsa_circ_29605	hsa-circRNA2610-3	HSA_CIRCpedia_15136	exon	SNX1	1.32761	0.00848581
chr5:93386436|93410474	hsa-FAM172A_0003	-	-	hsa-circRNA14361-9	HSA_CIRCpedia_52996	exon	FAM172A	1.32597	0.00486853
chr13:24823615|24826000	hsa-SPATA13_0006	hsa_circ_0003040	hsa_circ_14805	hsa-circRNA2080-1	HSA_CIRCpedia_10390	exon	SPATA13,RP11-307N16.6	1.32521	0.038028
chr9:113205825|113221393	hsa-SVEP1_0024	-	-	hsa-circRNA15875-4	HSA_CIRCpedia_62224	exon	SVEP1	1.31996	0.0304675
chr3:129546646|129551669	hsa-TMCC1_0003	hsa_circ_0067323	hsa_circ_20952	hsa-circRNA13743-1	HSA_CIRCpedia_43524	exon	TMCC1	1.31867	0.0156546
chr5:128440649|128442755	hsa-ISOC1_0001	hsa_circ_0007067	hsa_circ_08969	hsa-circRNA6419	HSA_CIRCpedia_50066	exon	ISOC1	1.31167	0.03083
chr4:169141806|169158946	hsa-DDX60_0003	hsa_circ_0004303	hsa_circ_31082	hsa-circRNA14179-3	HSA_CIRCpedia_47890	exon	DDX60	1.3085	0.000470441
chr1:179955304|179975702	hsa-CEP350_0028	-	hsa_circ_28585	hsa-circRNA644-40	HSA_CIRCpedia_29041	exon	CEP350	1.30806	0.0144483
chr1:8716032|8716500	hsa-RERE_0023	-	hsa_circ_12952	hsa-circRNA8283-30	HSA_CIRCpedia_33067	exon	RERE	1.3052	0.0449866
chr8:133634857|133673873	hsa-LRRC6_0001	-	hsa_circ_23671	hsa-circRNA15615-4	HSA_CIRCpedia_69482	exon	LRRC6	1.30345	0.0245692
chrX:53622147|53634660	hsa-HUWE1_0019	hsa_circ_0005518	hsa_circ_31426	hsa-circRNA16135-207	HSA_CIRCpedia_66050	exon	HUWE1	1.30059	0.00562215
chr14:31416296|31425448	hsa-STRN3_0006	hsa_circ_0031447	hsa_circ_25574	hsa-circRNA10414-23	HSA_CIRCpedia_11862	exon	STRN3	1.30049	0.0328008
chr1:225140372|225161855	hsa-DNAH14_0002	hsa_circ_0016600	hsa_circ_04127	hsa-circRNA770-67	HSA_CIRCpedia_30257	exon	DNAH14	1.29911	0.0449866
chr15:59494525|59506919	hsa-MYO1E_0019	hsa_circ_0005350	hsa_circ_25492	hsa-circRNA10753-65	HSA_CIRCpedia_14952	exon	MYO1E,RNU4-80P	1.29405	0.0250265
chr3:101383382|101391057	hsa-ZBTB11_0002	-	hsa_circ_06117	hsa-circRNA13662-11	HSA_CIRCpedia_42872	exon	ZBTB11	1.29275	0.000945607
chr18:23632588|23658124	hsa-SS18_0003	hsa_circ_0002164	hsa_circ_17255	hsa-circRNA11778-2	HSA_CIRCpedia_23538	exon	SS18	1.29213	0.00236259
chr4:121675708|121732604	hsa-PRDM5_0001	hsa_circ_0005654	hsa_circ_09518	hsa-circRNA14119-1	HSA_CIRCpedia_47291	exon	PRDM5	1.28933	0.0361706
chr11:1000432|1003804	hsa-AP2A2_0004	hsa_circ_0020749	hsa_circ_20030	hsa-circRNA1188-18	HSA_CIRCpedia_3007	exon	AP2A2	1.28735	0.0230909
chr9:111868788|111870850	hsa-TMEM245_0014	hsa_circ_0087938	hsa_circ_02259	hsa-circRNA15871-40	HSA_CIRCpedia_62196	exon	TMEM245	1.28493	0.0392326
chr10:126097111|126100769	hsa-OAT_0002	hsa_circ_0008898	hsa_circ_22993	hsa-circRNA9325-1	HSA_CIRCpedia_819	exon	OAT	1.28484	0.0333012
chr1:89206671|89251896	hsa-PKN2_0002	hsa_circ_0013093	hsa_circ_07030	hsa-circRNA377-13	HSA_CIRCpedia_33082	exon	PKN2	1.28321	0.0324033
chr4:89772171|89772334	hsa-FAM13A_0022	hsa_circ_0070433	hsa_circ_13227	hsa-circRNA14068-16	HSA_CIRCpedia_49580	exon	FAM13A	1.27895	0.0381542
chr8:141810558|141900868	hsa-PTK2_0129	hsa_circ_0007521	hsa_circ_30334	hsa-circRNA15624-68	HSA_CIRCpedia_60255	exon	PTK2	1.27855	0.0460126
chr1:168007609|168014465	hsa-DCAF6_0005	hsa_circ_0000155	hsa_circ_32611	hsa-circRNA611-20	HSA_CIRCpedia_28605	exon	DCAF6	1.27425	0.0190039
chr5:112321532|112339774	hsa-DCP2_0008	hsa_circ_0001520	hsa_circ_08679	hsa-circRNA6388-5	HSA_CIRCpedia_49851	exon	DCP2	1.27318	0.049537
chr1:31810022|31811895	hsa-ZCCHC17_0008	hsa_circ_0009057	hsa_circ_00619	hsa-circRNA176-10	HSA_CIRCpedia_31356	exon	ZCCHC17	1.27149	0.0324033
chr20:3888573|3893281	hsa-PANK2_0004	hsa_circ_0006873	hsa_circ_28242	hsa-circRNA4913-9	HSA_CIRCpedia_34201	exon	PANK2	1.27132	0.00170396
chr9:19356970|19360487	hsa-DENND4C_0068	hsa_circ_0005373	hsa_circ_15349	hsa-circRNA7627-14	HSA_CIRCpedia_63688	exon	DENND4C	1.26712	0.00188645
chr8:30034642|30038146	hsa-DCTN6_0002	hsa_circ_0001786	hsa_circ_06929	hsa-circRNA7408-5	HSA_CIRCpedia_60826	exon	LEPROTL1,DCTN6	1.26575	0.0117275
chr9:33948372|33948585	hsa-UBAP2_0077	hsa_circ_0002976	hsa_circ_01498	hsa-circRNA15725-62	HSA_CIRCpedia_63919	exon	UBAP2	1.2641	0.0354393
chr16:55703477|55706087	hsa-SLC6A2_0001	hsa_circ_0039415	-	hsa-circRNA3005-8	HSA_CIRCpedia_17914	exon	SLC6A2	1.26201	0.00460984
chr3:32774915|32778982	hsa-CNOT10_0001	-	hsa_circ_13063	hsa-circRNA5484-16	HSA_CIRCpedia_45342	exon	CNOT10	1.26104	0.00517452
chr12:50829271|50835426	hsa-LARP4_0008	hsa_circ_0026235	-	hsa-circRNA1767-2	HSA_CIRCpedia_8696	exon	LARP4	1.2594	0.00138888
chr1:21083659|21107033	hsa-HP1BP3_0018	hsa_circ_0002437	hsa_circ_29570	hsa-circRNA8345-5	HSA_CIRCpedia_29771	exon	HP1BP3	1.25719	0.0094157
chr4:39915231|39924368	hsa-PDS5A_0020	hsa_circ_0006567	hsa_circ_23996	hsa-circRNA13986-29	HSA_CIRCpedia_48597	exon	PDS5A	1.25405	0.0142556
chr18:13048858|13059311	hsa-CEP192_0031	hsa_circ_0047021	hsa_circ_14298	hsa-circRNA3617-31	HSA_CIRCpedia_23230	exon	CEP192	1.25342	0.00770654
chr10:11523769|11527910	hsa-USP6NL_0007	hsa_circ_0017683	hsa_circ_26546	hsa-circRNA9047-3	HSA_CIRCpedia_435	exon	USP6NL	1.25156	0.0038234
chr18:18945988|18983955	hsa-GREB1L_0005	hsa_circ_0003653	hsa_circ_28741	hsa-circRNA3623-15	HSA_CIRCpedia_23288	exon	GREB1L	1.24969	0.00577637
chr4:52714371|52744020	hsa-DCUN1D4_0026	-	-	hsa-circRNA5987-13	HSA_CIRCpedia_48794	exon	DCUN1D4	1.24608	0.00423606
chr16:11940358|11940700	hsa-RSL1D1_0001	hsa_circ_0000673	hsa_circ_30908	hsa-circRNA11000-9	HSA_CIRCpedia_16348	exon	RSL1D1	1.24543	0.0324033
chr14:31585442|31590711	hsa-HECTD1_0007	hsa_circ_0031465	hsa_circ_00266	hsa-circRNA10415-4	HSA_CIRCpedia_11880	exon	HECTD1	1.24491	0.0385089
chr13:37614542|37625720	hsa-SUPT20H_0014	hsa_circ_0000475	hsa_circ_10136	hsa-circRNA10253-6	HSA_CIRCpedia_10653	exon	SUPT20H	1.24181	0.0479979
chr1:231090079|231097049	hsa-TTC13_0001	hsa_circ_0000195	hsa_circ_27576	hsa-circRNA8986-20	HSA_CIRCpedia_30508	exon	TTC13	1.24099	0.0396475
chr9:132841909|132854660	hsa-GPR107_0016	-	hsa_circ_17208	hsa-circRNA7846-1	HSA_CIRCpedia_63130	exon	GPR107	1.23853	0.00350134
chr1:42730786|42776781	hsa-FOXJ3_0002	hsa_circ_0004416	hsa_circ_14879	hsa-circRNA8467-25	HSA_CIRCpedia_31913	exon	FOXJ3	1.2381	0.0449329
chr1:87181407|87190088	hsa-SH3GLB1_0001	-	hsa_circ_20840	hsa-circRNA375-4	HSA_CIRCpedia_33069	exon	SH3GLB1	1.23763	0.0360839
chr5:95099212|95103870	hsa-RHOBTB3_0023	hsa_circ_0073447	-	hsa-circRNA6364-18	HSA_CIRCpedia_101398	exon	RHOBTB3	1.23701	0.0211624
chr19:17212470|17213367	hsa-MYO9B_0005	hsa_circ_0000907	hsa_circ_12544	hsa-circRNA3921-4	HSA_CIRCpedia_25087	exon	MYO9B	1.23067	0.0404439
chr9:2096657|2123937	hsa-SMARCA2_0002	-	hsa_circ_19692	hsa-circRNA7605-6	HSA_CIRCpedia_63761	exon	SMARCA2	1.22171	0.0026006
chr11:93480463|93493024	hsa-C11orf54_0010	-	hsa_circ_00534	hsa-circRNA1511-2	HSA_CIRCpedia_6070	exon	C11orf54	1.22028	0.0434061
chr2:24181171|24199945	hsa-UBXN2A_0011	hsa_circ_0005970	hsa_circ_30035	hsa-circRNA4350-1	HSA_CIRCpedia_40291	exon	UBXN2A	1.22013	0.00381952
chr20:32659872|32666359	hsa-RALY_0001	hsa_circ_0001140	hsa_circ_27034	hsa-circRNA4984-17	HSA_CIRCpedia_33777	exon	RALY	1.21864	0.0374616
chr16:74491772|74493687	hsa-GLG1_0031	hsa_circ_0004315	hsa_circ_19978	hsa-circRNA11179-31	HSA_CIRCpedia_18702	exon	GLG1	1.2185	0.0284609
chr1:155447677|155452240	hsa-ASH1L_0069	hsa_circ_0014590	hsa_circ_32505	hsa-circRNA8777-25	HSA_CIRCpedia_28189	exon	ASH1L	1.21805	0.0108622
chr22:46085592|46136418	hsa-ATXN10_0012	hsa_circ_0008199	hsa_circ_13065	hsa-circRNA5377-1	HSA_CIRCpedia_37033	exon	ATXN10	1.21651	0.00742215
chr14:81209419|81244390	hsa-CEP128_0030	hsa_circ_0032822	hsa_circ_08134	hsa-circRNA10541-11	HSA_CIRCpedia_13233	exon	CEP128	1.21486	0.0212697
chr14:102659800|102661457	hsa-WDR20_0002	hsa_circ_0000569	hsa_circ_31954	hsa-circRNA2438-3	HSA_CIRCpedia_11449	exon	WDR20	1.21456	0.0328008
chr18:29691717|29704808	hsa-RNF138_0002	hsa_circ_0047378	hsa_circ_03224	hsa-circRNA3641-5	HSA_CIRCpedia_23679	exon	RNF138,RP11-53I6.2	1.21368	0.0469533
chr2:171867883|171884915	hsa-TLK1_0058	hsa_circ_0057028	hsa_circ_05380	hsa-circRNA12770-40	HSA_CIRCpedia_38563	exon	TLK1	1.21033	0.0326888
chr14:92185762|92195823	hsa-CATSPERB_0005	-	-	-	HSA_CIRCpedia_162679	exon	CATSPERB	1.20667	0.00419049
chr22:28692186|28693840	hsa-TTC28_0002	hsa_circ_0003618	hsa_circ_22261	hsa-circRNA13284-12	HSA_CIRCpedia_36240	exon	TTC28	1.20453	0.00924712
chr6:76344423|76380436	hsa-SENP6_0018	hsa_circ_0077084	hsa_circ_05385	hsa-circRNA6813-30	HSA_CIRCpedia_55539	exon	SENP6,RNU6-1016P	1.20032	0.0012244
chr2:197135917|197172809	hsa-HECW2_0002	hsa_circ_0057582	hsa_circ_32079	hsa-circRNA12824-35	HSA_CIRCpedia_38976	exon	HECW2	1.20027	0.0240691
chr1:41512079|41541123	hsa-SCMH1_0002	hsa_circ_0011938	hsa_circ_16170	hsa-circRNA8462-27	HSA_CIRCpedia_31871	exon	SCMH1	1.19784	0.00540562
chr22:45197957|45221473	hsa-ARHGAP8_0002	hsa_circ_0063716	hsa_circ_24318	hsa-circRNA5369-2	HSA_CIRCpedia_36993	exon	PRR5-ARHGAP8,ARHGAP8	1.18882	0.0374616
chr8:38205015|38205733	hsa-WHSC1L1_0003	hsa_circ_0083996	hsa_circ_20917	hsa-circRNA15475-18	HSA_CIRCpedia_60979	exon	WHSC1L1	1.18667	0.00586772
chr9:33886879|33900269	hsa-UBE2R2_0001	hsa_circ_0003624	hsa_circ_25942	hsa-circRNA7643-2	HSA_CIRCpedia_63897	exon	UBE2R2	1.18608	0.0447146
chr3:47147487|47158244	hsa-SETD2_0019	-	hsa_circ_25009	hsa-circRNA13512-54	HSA_CIRCpedia_45841	exon	SETD2	1.18516	0.0343776
chr5:37238959|37239971	hsa-C5orf42_0016	-	hsa_circ_32893	hsa-circRNA14264-6	HSA_CIRCpedia_51719	exon	C5orf42	1.1796	0.0378856
chr16:19653718|19663412	hsa-C16orf62_0018	hsa_circ_0006730	hsa_circ_31757	hsa-circRNA2880-31	HSA_CIRCpedia_16842	exon	C16orf62	1.17452	0.00264174
chr17:64023619|64026141	hsa-CEP112_0022	-	-	-	HSA_CIRCpedia_22087	exon	CEP112	1.17276	0.00467348
chr15:94899366|94913409	hsa-MCTP2_0012	hsa_circ_0000659	hsa_circ_21411	hsa-circRNA2741-2	HSA_CIRCpedia_16224	exon	MCTP2	1.17025	0.0132127
chr11:94178976|94180604	hsa-MRE11A_0005	hsa_circ_0024037	hsa_circ_00881	hsa-circRNA9667-11	HSA_CIRCpedia_6088	exon	MRE11A	1.16854	0.00286296
chr12:66597491|66611015	hsa-IRAK3_0003	hsa_circ_0008381	hsa_circ_31240	hsa-circRNA1864-9	HSA_CIRCpedia_9381	exon	IRAK3	1.16788	0.0454447
chr3:51474986|51477919	hsa-DCAF1_0001	hsa_circ_0007485	hsa_circ_03681	hsa-circRNA13571-17	HSA_CIRCpedia_46259	exon	VPRBP	1.16772	0.00208159
chr3:142231102|142279296	hsa-ATR_0097	-	-	hsa-circRNA13773-47	HSA_CIRCpedia_43911	exon	ATR	1.16301	0.0105783
chr16:19627436|19628130	hsa-C16orf62_0031	hsa_circ_0005835	hsa_circ_05682	hsa-circRNA2880-51	HSA_CIRCpedia_16819	exon	C16orf62	1.15786	0.0449866
chr22:45921423|45923889	hsa-FBLN1_0004	hsa_circ_0063743	-	hsa-circRNA5376-28	HSA_CIRCpedia_37015	exon	FBLN1	1.15375	0.00159609
chr7:42079637|42088295	hsa-GLI3_0002	hsa_circ_0079950	-	hsa-circRNA15109-9	HSA_CIRCpedia_58059	exon	GLI3	1.15241	0.00350134
chr10:34661426|34673182	hsa-PARD3_0002	hsa_circ_0018180	hsa_circ_31147	hsa-circRNA9102-11	HSA_CIRCpedia_1559	exon	PARD3	1.15032	0.0229004
chr12:1399018|1517413	hsa-ERC1_0057	hsa_circ_0024998	-	hsa-circRNA1626-11	HSA_CIRCpedia_7823	exon	ERC1,RP5-951N9.2	1.1495	0.00414045
chr7:44714010|44714867	hsa-OGDH_0015	hsa_circ_0005004	hsa_circ_10009	hsa-circRNA7063-18	HSA_CIRCpedia_58136	exon	OGDH	1.1453	0.0343267
chr7:139415731|139416814	hsa-HIPK2_0003	hsa_circ_0001756	hsa_circ_11146	hsa-circRNA15341-5	HSA_CIRCpedia_56991	exon	HIPK2	1.14472	0.0490478
chr9:113217870|113234603	hsa-SVEP1_0025	-	hsa_circ_25234	hsa-circRNA15875-12	HSA_CIRCpedia_166124	exon	SVEP1	1.14389	0.0127786
chr2:233612325|233613792	hsa-GIGYF2_0004	hsa_circ_0058728	-	hsa-circRNA4845-1	HSA_CIRCpedia_40049	exon	GIGYF2	1.14253	0.00264174
chr18:74561482|74583781	hsa-ZNF236_0005	hsa_circ_0001993	hsa_circ_24767	hsa-circRNA3715-32	HSA_CIRCpedia_24314	exon	ZNF236	1.14049	0.0391771
chr22:41513191|41513825	hsa-EP300_0005	hsa_circ_0007297	hsa_circ_03578	hsa-circRNA5346-12	HSA_CIRCpedia_36796	exon	EP300	1.13898	0.0324751
chr10:91511103|91522592	hsa-KIF20B_0038	hsa_circ_0019079	hsa_circ_05853	hsa-circRNA1021-9	HSA_CIRCpedia_2690	exon	KIF20B	1.1373	0.0424173
chr15:56680670|56687032	hsa-TEX9_0003	hsa_circ_0000603	hsa_circ_15631	hsa-circRNA2592-3	HSA_CIRCpedia_14843	exon	TEX9	1.13263	0.00350134
chr15:72810408|72864506	hsa-ARIH1_0001	-	hsa_circ_26110	hsa-circRNA2646-8	HSA_CIRCpedia_15569	exon	ARIH1	1.1299	0.00540562
chr9:119106822|119130033	hsa-PAPPA_0021	hsa_circ_0088249	-	hsa-circRNA7785-25	HSA_CIRCpedia_62469	exon	PAPPA	1.12881	0.0367762
chr9:108467878|108484902	hsa-TMEM38B_0001	hsa_circ_0005171	hsa_circ_26155	hsa-circRNA7759-8	HSA_CIRCpedia_62115	exon	TMEM38B	1.12808	0.00600355
chr2:190670378|190682906	hsa-PMS1_0009	-	-	hsa-circRNA4728-11	HSA_CIRCpedia_38904	exon	PMS1	1.12684	0.00649169
chr13:77779391|77818086	hsa-MYCBP2_0192	hsa_circ_0030509	hsa_circ_10490	hsa-circRNA10323-12	HSA_CIRCpedia_11127	exon	MYCBP2	1.12492	0.0257395
chr1:154145384|154145677	hsa-TPM3_0002	hsa_circ_0008368	hsa_circ_00947	hsa-circRNA8755-2	HSA_CIRCpedia_28070	exon	TPM3	1.12281	0.0133424
chr1:150202906|150204264	hsa-ANP32E_0005	hsa_circ_0004300	hsa_circ_23531	hsa-circRNA8707-1	HSA_CIRCpedia_27814	exon	ANP32E	1.11954	0.0156546
chr16:18851020|18853776	hsa-SMG1_0027	hsa_circ_0008216	hsa_circ_23363	hsa-circRNA11025-35	HSA_CIRCpedia_16758	exon	SMG1	1.11894	0.0483093
chr12:72020040|72022817	hsa-ZFC3H1_0010	hsa_circ_0008912	hsa_circ_04092	hsa-circRNA10028-23	HSA_CIRCpedia_9556	exon	ZFC3H1	1.11889	0.00246929
chr9:95018962|95048121	hsa-IARS_0008	hsa_circ_0087493	hsa_circ_18041	hsa-circRNA15822-39	HSA_CIRCpedia_64687	exon	IARS	1.11665	0.00478517
chr20:30115287|30115853	hsa-HM13_0006	hsa_circ_0002035	-	hsa-circRNA4963-1	HSA_CIRCpedia_33603	exon	HM13	1.11657	0.0113143
chr16:85701746|85704704	hsa-GSE1_0002	hsa_circ_0040738	-	hsa-circRNA3131-6	HSA_CIRCpedia_18960	exon	GSE1	1.11572	0.0312587
chr2:159992705|160007067	hsa-TANC1_0001	hsa_circ_0008010	hsa_circ_06145	hsa-circRNA4665-25	HSA_CIRCpedia_38309	exon	TANC1	1.11552	0.0436521
chr4:184114752|184130178	hsa-WWC2_0002	hsa_circ_0003437	hsa_circ_20895	hsa-circRNA6181-2	HSA_CIRCpedia_48036	exon	WWC2	1.11456	0.00529642
chr17:4186093|4210418	hsa-UBE2G1_0001	hsa_circ_0004805	hsa_circ_07118	hsa-circRNA11289-7	HSA_CIRCpedia_20947	exon	UBE2G1	1.11389	0.0228647
chr11:32611093|32617593	hsa-EIF3M_0003	hsa_circ_0003119	hsa_circ_14012	hsa-circRNA1275-3	HSA_CIRCpedia_4110	exon	EIF3M	1.11384	0.0201738
chr9:99271955|99327765	hsa-CDC14B_0006	hsa_circ_0087636	hsa_circ_29502	hsa-circRNA15841-19	HSA_CIRCpedia_64843	exon	CDC14B	1.11015	0.0247623
chr14:67812485|67814170	hsa-ATP6V1D_0005	-	hsa_circ_29125	hsa-circRNA10493-7	HSA_CIRCpedia_12740	exon	ATP6V1D	1.10788	0.00885524
chr5:31448654|31472339	hsa-DROSHA_0004	hsa_circ_0072056	hsa_circ_05142	hsa-circRNA14251-33	HSA_CIRCpedia_51531	exon	DROSHA	1.10729	0.0089591
chr13:22095384|22113827	hsa-MICU2_0002	hsa_circ_0029713	-	hsa-circRNA10223-1	HSA_CIRCpedia_69843	exon	MICU2,snoU13	1.10561	0.0320986
chr12:93192668|93205210	hsa-EEA1_0011	hsa_circ_0027713	-	hsa-circRNA10058-7	HSA_CIRCpedia_9773	exon	EEA1	1.10354	0.00898713
chr17:58013576|58013902	hsa-RPS6KB1_0030	hsa_circ_0044907	hsa_circ_31105	hsa-circRNA3465-9	HSA_CIRCpedia_21698	exon	RPS6KB1	1.09975	0.00264174
chr16:29845054|29845387	hsa-MVP_0002	hsa_circ_0000688	hsa_circ_24410	hsa-circRNA2944-2	HSA_CIRCpedia_17373	exon	MVP	1.09815	0.045482
chr11:118451961|118455359	hsa-ARCN1_0002	hsa_circ_0006374	hsa_circ_01104	hsa-circRNA1566-7	HSA_CIRCpedia_3392	exon	ARCN1	1.09709	0.0490267
chr9:33986758|33998862	hsa-UBAP2_0006	hsa_circ_0001852	hsa_circ_30817	hsa-circRNA15725-32	HSA_CIRCpedia_63947	exon	UBAP2	1.09583	0.00396533
chr15:85230856|85234875	hsa-SEC11A_0001	hsa_circ_0036599	hsa_circ_28418	hsa-circRNA10873-2	HSA_CIRCpedia_15933	exon	SEC11A	1.09496	0.0136301
chr16:89484692|89497734	hsa-ANKRD11_0008	hsa_circ_0000727	hsa_circ_26017	hsa-circRNA11238-10	HSA_CIRCpedia_19109	exon	ANKRD11,RP1-168P16.1	1.09465	0.0183269
chr8:56695307|56708711	hsa-TGS1_0006	-	hsa_circ_22530	hsa-circRNA7451-7	HSA_CIRCpedia_61374	exon	TGS1	1.09457	0.00442249
chr10:98667022|98711953	hsa-LCOR_0004	hsa_circ_0019316	hsa_circ_21801	hsa-circRNA1046-11	HSA_CIRCpedia_2937	exon	LCOR,AL162502.1	1.09155	0.00562215
chr22:38917613|38964294	hsa-DMC1_0001	hsa_circ_0001231	hsa_circ_02199	hsa-circRNA13345-4	HSA_CIRCpedia_36689	exon	DMC1	1.09071	0.00703257
chr19:34818326|34819056	hsa-KIAA0355_0006	hsa_circ_0008191	hsa_circ_30493	hsa-circRNA4009-3	HSA_CIRCpedia_25548	exon	KIAA0355	1.08933	0.0212315
chr5:64625205|64769779	hsa-ADAMTS6_0013	hsa_circ_0072685	-	hsa-circRNA14308-48	HSA_CIRCpedia_52187	exon	ADAMTS6	1.08801	0.0405079
chr2:135093788|135107509	hsa-MGAT5_0001	-	hsa_circ_07986	hsa-circRNA4640-34	HSA_CIRCpedia_37915	exon	MGAT5	1.08604	0.0284609
chr8:27987019|28019595	hsa-ELP3_0001	hsa_circ_0001784	hsa_circ_17773	hsa-circRNA7403-13	HSA_CIRCpedia_60765	exon	ELP3	1.08245	0.0265236
chr6:6167691|6182374	hsa-F13A1_0008	hsa_circ_0075539	-	hsa-circRNA14586-5	-	exon	F13A1	1.08188	0.0291006
chr14:75136352|75138186	hsa-AREL1_0014	hsa_circ_0005030	hsa_circ_16681	hsa-circRNA10523-4	HSA_CIRCpedia_13052	exon	AREL1	1.07981	0.0126235
chr2:32698180|32712868	hsa-BIRC6_0034	-	-	hsa-circRNA4390-1	HSA_CIRCpedia_40855	exon	BIRC6	1.07701	0.0240691
chr13:96485181|96489456	hsa-UGGT2_0007	hsa_circ_0008274	hsa_circ_10555	hsa-circRNA10332-25	HSA_CIRCpedia_11259	exon	UGGT2	1.07542	0.00348117
chr1:31478700|31479949	hsa-PUM1_0023	hsa_circ_0004949	hsa_circ_13049	hsa-circRNA8401-67	HSA_CIRCpedia_31332	exon	PUM1	1.07318	0.00545277
chr22:18178907|18185152	hsa-BCL2L13_0001	hsa_circ_0062171	hsa_circ_23327	hsa-circRNA5206-8	HSA_CIRCpedia_35849	exon	BCL2L13	1.06972	0.00396533
chr13:49688791|49720071	hsa-FNDC3A_0030	-	hsa_circ_25849	hsa-circRNA2133-9	HSA_CIRCpedia_10855	exon	FNDC3A	1.06194	0.00959368
chr3:151129066|151134210	hsa-MED12L_0019	-	-	hsa-circRNA5777-2	HSA_CIRCpedia_44061	exon	MED12L	1.0601	0.0045711
chr7:121753172|121773795	hsa-AASS_0001	hsa_circ_0006919	hsa_circ_08421	hsa-circRNA15292-10	HSA_CIRCpedia_56439	exon	AASS	1.05859	0.00254776
chr20:36393599|36396446	hsa-CTNNBL1_0022	hsa_circ_0060306	hsa_circ_07993	hsa-circRNA5008-7	HSA_CIRCpedia_34124	exon	CTNNBL1	1.05488	0.00733747
chr5:54941617|54952602	hsa-SLC38A9_0005	hsa_circ_0005680	hsa_circ_26216	hsa-circRNA14291-20	HSA_CIRCpedia_51978	exon	SLC38A9	1.05234	0.0425171
chr1:180793889|180794480	hsa-XPR1_0008	hsa_circ_0005909	hsa_circ_02503	hsa-circRNA648-15	HSA_CIRCpedia_29081	exon	XPR1	1.05166	0.00414045
chr4:139981478|139994721	hsa-ELF2_0019	hsa_circ_0007137	hsa_circ_01128	hsa-circRNA14136-1	HSA_CIRCpedia_47465	exon	ELF2	1.05097	0.00959368
chr14:67736418|67790529	hsa-MPP5_0013	-	-	-	HSA_CIRCpedia_113402	exon	MPP5	1.04624	0.012332
chr3:23997528|24001306	hsa-NR1D2_0007	-	hsa_circ_16029	hsa-circRNA5469-3	HSA_CIRCpedia_45191	exon	NR1D2	1.04558	0.0211041
chrX:67412761|67426515	hsa-OPHN1_0003	-	-	-	HSA_CIRCpedia_94666	exon	OPHN1	1.04475	0.0105676
chr20:16506737|16509085	hsa-KIF16B_0010	hsa_circ_0059490	hsa_circ_03569	hsa-circRNA12993-14	HSA_CIRCpedia_33394	exon	KIF16B	1.04239	0.0455362
chr9:98740343|98766983	hsa-ERCC6L2_0003	hsa_circ_0008720	hsa_circ_18774	hsa-circRNA7728-14	HSA_CIRCpedia_64816	exon	ERCC6L2	1.03867	0.0222425
chr12:50385781|50386438	hsa-RACGAP1_0007	hsa_circ_0009035	hsa_circ_19394	hsa-circRNA9929-28	HSA_CIRCpedia_8641	exon	RACGAP1	1.03435	0.00460984
chr5:64537931|64569274	hsa-ADAMTS6_0004	-	hsa_circ_21332	hsa-circRNA14308-27	HSA_CIRCpedia_52172	exon	RPEP1,ADAMTS6	1.03417	0.0105676
chr8:17092225|17094882	hsa-CNOT7_0003	hsa_circ_0008752	hsa_circ_28539	hsa-circRNA15420-2	HSA_CIRCpedia_60437	exon	CNOT7	1.03238	0.0455786
chr7:77006165|77033932	hsa-GSAP_0016	hsa_circ_0080831	hsa_circ_28391	hsa-circRNA15174-3	HSA_CIRCpedia_59013	exon	GSAP	1.0313	0.0038234
chr5:179134133|179136060	hsa-CANX_0005	hsa_circ_0003938	hsa_circ_10377	hsa-circRNA6571-17	HSA_CIRCpedia_51384	exon	CANX	1.0279	0.0240691
chr5:34918469|34923339	hsa-BRIX1_0001	hsa_circ_0006970	hsa_circ_20891	hsa-circRNA6238-6	HSA_CIRCpedia_51640	exon	BRIX1	1.02668	0.00629567
chr1:94953098|94972198	hsa-ABCD3_0015	-	hsa_circ_06956	hsa-circRNA395-2	HSA_CIRCpedia_33255	exon	ABCD3	1.02498	0.00460984
chr9:103065914|103111654	hsa-TEX10_0020	-	-	hsa-circRNA15865-19	HSA_CIRCpedia_62057	exon	TEX10	1.02402	0.0361686
chr12:96688777|96694138	hsa-CDK17_0005	-	-	-	HSA_CIRCpedia_72056	exon	CDK17	1.02161	0.00381952
chr10:128768966|128860040	hsa-DOCK1_0010	hsa_circ_0020394	hsa_circ_00689	hsa-circRNA1152-75	HSA_CIRCpedia_907	exon	DOCK1	1.02004	0.00214555
chr6:129932678|129939997	hsa-ARHGAP18_0007	hsa_circ_0006887	hsa_circ_20049	hsa-circRNA14905-3	HSA_CIRCpedia_53509	exon	ARHGAP18	1.0115	0.0188675
chr2:113405230|113410375	hsa-SLC20A1_0003	-	hsa_circ_16834	hsa-circRNA4592-2	HSA_CIRCpedia_37569	exon	SLC20A1	1.01148	0.00343893
chr13:99896086|99896878	hsa-UBAC2_0004	hsa_circ_0030722	hsa_circ_32736	hsa-circRNA2176-6	HSA_CIRCpedia_11347	exon	UBAC2	1.00976	0.00745604
chr7:79818267|79842185	hsa-GNAI1_0001	-	hsa_circ_26538	hsa-circRNA7137-2	HSA_CIRCpedia_97919	exon	GNAI1	1.00831	0.00852879
chr5:74109665|74137504	hsa-FAM169A_0002	hsa_circ_0007158	hsa_circ_05755	hsa-circRNA14330-9	HSA_CIRCpedia_52581	exon	FAM169A	1.00442	0.025752
chr5:137759764|137761271	hsa-KDM3B_0039	hsa_circ_0004763	hsa_circ_14199	hsa-circRNA6454-3	HSA_CIRCpedia_50410	exon	KDM3B	1.00392	0.0232189
chr5:137278564|137284873	hsa-FAM13B_0009	-	hsa_circ_20943	hsa-circRNA14431-4	HSA_CIRCpedia_50334	exon	FAM13B	1.00372	0.0130513
chr14:71880665|71996087	hsa-SIPA1L1_0030	-	-	hsa-circRNA2355-31	HSA_CIRCpedia_12923	exon	RN7SL683P,SIPA1L1	1.00314	0.0154818
chr2:190656516|190670480	hsa-PMS1_0003	hsa_circ_0004776	hsa_circ_02227	hsa-circRNA4728-7	HSA_CIRCpedia_38900	exon	PMS1	1.00266	0.00909015
chr4:53476707|53497311	hsa-USP46_0002	-	hsa_circ_04553	hsa-circRNA14000-4	HSA_CIRCpedia_48808	exon	USP46	1.00186	0.00529642
chr1:46543187|46546422	hsa-PIK3R3_0004	hsa_circ_0003161	hsa_circ_00478	hsa-circRNA8492-6	HSA_CIRCpedia_32126	exon	PIK3R3	1.00068	0.0157108
chr2:175324606|175346715	hsa-GPR155_0018	-	hsa_circ_30352	hsa-circRNA12780-1	HSA_CIRCpedia_122751	exon	GPR155	-1.0003	0.00617967
chr7:94228087|94259153	hsa-SGCE_0014	hsa_circ_0081170	hsa_circ_19376	hsa-circRNA15205-3	HSA_CIRCpedia_59351	exon	SGCE	-1.00176	0.00536994
chr2:227729320|227732034	hsa-RHBDD1_0004	hsa_circ_0058493	hsa_circ_08240	hsa-circRNA4829-8	HSA_CIRCpedia_39877	exon	RHBDD1	-1.00685	0.00581227
chr1:175996708|176015460	hsa-RFWD2_0011	hsa_circ_0015359	hsa_circ_30948	hsa-circRNA8852-22	HSA_CIRCpedia_28882	exon	RFWD2	-1.0162	0.00571167
chr19:8995635|8997536	hsa-MUC16_0003	-	hsa_circ_11349	hsa-circRNA11966-43	HSA_CIRCpedia_26913	exon	MUC16	-1.02	0.00153563
chr4:140314745|140325644	hsa-NAA15_0038	-	-	hsa-circRNA6121	HSA_CIRCpedia_351765	exon	NAA15	-1.02097	0.00550256
chr8:68015272|68044315	hsa-CSPP1_0039	hsa_circ_0001805	hsa_circ_21238	hsa-circRNA7471-54	HSA_CIRCpedia_61522	exon	CSPP1	-1.02316	0.00650648
chr3:100451352|100455548	hsa-TFG_0003	hsa_circ_0006179	hsa_circ_02446	hsa-circRNA5652-11	HSA_CIRCpedia_42817	exon	TFG	-1.03537	0.0328008
chr1:111998708|112002258	hsa-ATP5F1_0002	hsa_circ_0006130	hsa_circ_23734	hsa-circRNA450-2	HSA_CIRCpedia_27283	exon	ATP5F1	-1.03888	0.00381952
chr20:56846419|56847931	hsa-PPP4R1L_0001	hsa_circ_0001172	hsa_circ_29212	hsa-circRNA13117-5	HSA_CIRCpedia_34816	exon	PPP4R1L	-1.04319	0.0198974
chr17:40497577|40500557	hsa-STAT3_0001	hsa_circ_0043816	hsa_circ_27517	hsa-circRNA11481-35	HSA_CIRCpedia_20767	exon	STAT3	-1.04479	0.00449975
chr17:33310021|33313150	hsa-LIG3_0002	hsa_circ_0043082	-	hsa-circRNA3318-8	HSA_CIRCpedia_20212	exon	LIG3	-1.04891	0.00283525
chr17:45447803|45492285	hsa-EFCAB13_0005	-	-	-	HSA_CIRCpedia_129792	exon	EFCAB13	-1.05027	0.0111619
chr7:138601494|138604184	hsa-KIAA1549_0006	hsa_circ_0082619	-	hsa-circRNA15337-14	HSA_CIRCpedia_56930	exon	KIAA1549	-1.05313	0.00138888
chr2:236706403|236715975	hsa-AGAP1_0003	hsa_circ_0058806	hsa_circ_26814	hsa-circRNA4856-25	HSA_CIRCpedia_40120	exon	AGAP1	-1.07737	0.0469533
chr2:165555915|165561615	hsa-COBLL1_0029	-	-	hsa-circRNA12756-2	HSA_CIRCpedia_38402	exon	COBLL1	-1.08788	0.0472755
chr11:2991033|2993473	hsa-NAP1L4_0004	hsa_circ_0020822	-	hsa-circRNA9370-7	HSA_CIRCpedia_4062	exon	NAP1L4	-1.0971	0.00516223
chr17:1516489|1518328	hsa-SLC43A2_0010	hsa_circ_0041266	-	hsa-circRNA11260-11	HSA_CIRCpedia_129442	exon	SLC43A2	-1.09765	0.00283525
chr1:145319624|145323705	-	-	-	-	-	exon	RP11-458D21.5,NBPF10	-1.09774	0.0404439
chrX:128692817|128703376	hsa-OCRL_0022	hsa_circ_0091490	-	hsa-circRNA8142-1	HSA_CIRCpedia_65173	exon	OCRL	-1.11019	0.00858088
chr9:108483818|108484902	hsa-TMEM38B_0004	hsa_circ_0087847	hsa_circ_16273	hsa-circRNA7759-5	HSA_CIRCpedia_62117	exon	TMEM38B	-1.11701	0.00380756
chr12:22796697|22826594	hsa-ETNK1_0001	hsa_circ_0008664	hsa_circ_03502	hsa-circRNA1712-4	HSA_CIRCpedia_7981	exon	ETNK1	-1.13087	0.0444896
chr3:125032152|125032500	hsa-ZNF148_0004	hsa_circ_0067103	hsa_circ_00455	hsa-circRNA13719-13	HSA_CIRCpedia_43336	exon	ZNF148	-1.13159	0.00761327
chr12:46339032|46345510	hsa-SCAF11_0002	hsa_circ_0025971	-	hsa-circRNA9899-1	HSA_CIRCpedia_8480	exon	SCAF11	-1.13175	0.00674644
chr11:95546096|95546753	hsa-CEP57_0001	hsa_circ_0024067	hsa_circ_18159	hsa-circRNA1520-4	HSA_CIRCpedia_6166	exon	CEP57	-1.13888	0.00285995
chr15:65759016|65772737	hsa-DPP8_0039	hsa_circ_0007527	hsa_circ_05523	hsa-circRNA10787-59	HSA_CIRCpedia_15250	exon	RP11-349G13.1,DPP8	-1.14495	0.00376673
chr8:37623044|37623873	hsa-PROSC_0001	hsa_circ_0001788	hsa_circ_21066	hsa-circRNA7417-5	HSA_CIRCpedia_60919	exon	PROSC	-1.1541	0.0380941
chr1:24140680|24147083	hsa-HMGCL_0002	hsa_circ_0003757	hsa_circ_05517	hsa-circRNA8363-1	HSA_CIRCpedia_30895	exon	HMGCL	-1.16061	0.0276834
chr3:140978965|141006295	hsa-PXYLP1_0003	hsa_circ_0067574	hsa_circ_00643	hsa-circRNA5759-2	HSA_CIRCpedia_105755	exon	ACPL2	-1.17024	0.00303355
chr8:17532695|17613470	hsa-MTUS1_0007	-	-	hsa-circRNA15423-5	HSA_CIRCpedia_60466	exon	MTUS1,MIR548V	-1.17352	0.000941661
chr2:24787164|24807429	hsa-NCOA1_0051	hsa_circ_0005968	-	hsa-circRNA4353-30	HSA_CIRCpedia_40439	exon	NCOA1	-1.17366	0.00198478
chr13:49712883|49720071	hsa-FNDC3A_0053	hsa_circ_0000481	hsa_circ_30420	hsa-circRNA2133-6	HSA_CIRCpedia_10858	exon	FNDC3A	-1.18229	0.0482218
chr9:16435553|16437522	hsa-BNC2_0001	hsa_circ_0086414	hsa_circ_22722	hsa-circRNA15697-1	HSA_CIRCpedia_63604	exon	BNC2	-1.18382	0.00097397
chr2:240929491|240954277	hsa-NDUFA10_0001	hsa_circ_0001119	hsa_circ_28916	hsa-circRNA12936-5	HSA_CIRCpedia_40247	exon	NDUFA10	-1.18589	0.0348489
chr2:46607857|46608734	hsa-EPAS1_0013	-	-	-	-	intron	EPAS1	-1.18845	0.00155545
chr16:71954642|71957283	hsa-IST1_0004	hsa_circ_0005016	hsa_circ_25696	hsa-circRNA3094-14	HSA_CIRCpedia_18644	exon	IST1	-1.19143	0.000679366
chr3:17051166|17084441	hsa-PLCL2_0001	-	hsa_circ_04086	hsa-circRNA5458-2	HSA_CIRCpedia_44379	exon	PLCL2	-1.21121	0.046636
chr1:51906019|51913807	hsa-EPS15_0002	hsa_circ_0006125	hsa_circ_25205	hsa-circRNA8505-27	HSA_CIRCpedia_32271	exon	EPS15	-1.21221	0.000617719
chr21:34066538|34067592	hsa-SYNJ1_0006	hsa_circ_0002369	hsa_circ_09014	hsa-circRNA13174-2	HSA_CIRCpedia_35251	exon	SYNJ1	-1.21521	0.0435328
chr3:119222379|119222868	hsa-TIMMDC1_0005	hsa_circ_0008394	hsa_circ_21634	hsa-circRNA5681-8	HSA_CIRCpedia_43071	exon	TIMMDC1	-1.21531	0.00140345
chr1:16044388|16047883	hsa-PLEKHM2_0001	hsa_circ_0000021	hsa_circ_27839	hsa-circRNA81-30	HSA_CIRCpedia_28440	exon	PLEKHM2	-1.22607	0.0452207
chr7:42063067|42088295	hsa-GLI3_0004	hsa_circ_0079948	hsa_circ_02249	hsa-circRNA15109-4	HSA_CIRCpedia_58056	exon	GLI3	-1.23438	0.0404439
chr1:35846860|35847359	hsa-ZMYM4_0003	hsa_circ_0002043	hsa_circ_16257	hsa-circRNA199-3	HSA_CIRCpedia_31534	exon	ZMYM4	-1.23519	0.000926642
chr7:157015948|157018233	hsa-UBE3C_0007	hsa_circ_0007864	hsa_circ_17961	hsa-circRNA7333-35	HSA_CIRCpedia_57421	exon	UBE3C	-1.23823	0.00381952
chr1:93029199|93101893	hsa-EVI5_0001	hsa_circ_0013163	hsa_circ_04059	hsa-circRNA8601-16	HSA_CIRCpedia_33168	exon	EVI5,RP4-593M8.1	-1.24974	0.0465879
chr2:32703703|32730272	hsa-BIRC6_0082	-	hsa_circ_02973	hsa-circRNA4390-20	HSA_CIRCpedia_40866	exon	BIRC6	-1.25	0.00381952
chr14:91142867|91156056	hsa-TTC7B_0007	hsa_circ_0032931	-	hsa-circRNA10556-38	HSA_CIRCpedia_13378	exon	TTC7B	-1.25105	0.00236259
chr14:66082696|66096324	hsa-FUT8_0002	-	hsa_circ_20176	hsa-circRNA2337-11	HSA_CIRCpedia_12704	exon	FUT8	-1.26298	0.0339138
chrX:114357090|114364762	hsa-LRCH2_0011	hsa_circ_0003300	hsa_circ_14851	hsa-circRNA16212-4	HSA_CIRCpedia_65035	exon	SNORA35,LRCH2	-1.26719	0.000964541
chr13:20409617|20413125	hsa-ZMYM5_0003	-	hsa_circ_10453	-	HSA_CIRCpedia_58243	exon	ZMYM5	-1.27421	0.00291012
chr4:41145004|41145159	hsa-APBB2_0039	hsa_circ_0069570	hsa_circ_03494	hsa-circRNA13988-13	HSA_CIRCpedia_48642	exon	APBB2	-1.27542	0.0029571
chr8:38947566|38948865	hsa-ADAM9_0005	hsa_circ_0084051	hsa_circ_17969	hsa-circRNA7427-16	HSA_CIRCpedia_61040	exon	ADAM9	-1.27628	0.0429675
chrX:138897037|138908982	hsa-ATP11C_0001	hsa_circ_0002372	hsa_circ_23656	hsa-circRNA16263-8	HSA_CIRCpedia_65305	exon	ATP11C	-1.27876	0.0412507
chr6:125366357|125379252	hsa-RNF217_0001	hsa_circ_0008536	hsa_circ_10890	hsa-circRNA6882-8	HSA_CIRCpedia_53459	exon	RNF217	-1.27949	0.0313929
chr17:79571574|79575848	hsa-NPLOC4_0029	hsa_circ_0000814	hsa_circ_08208	hsa-circRNA11716-19	HSA_CIRCpedia_22771	exon	NPLOC4	-1.28223	0.0440468
chr8:42761316|42829337	hsa-HOOK3_0034	hsa_circ_0084147	hsa_circ_09363	hsa-circRNA7439-3	HSA_CIRCpedia_61145	exon	HOOK3	-1.28227	0.00460327
chr2:160599572|160605414	hsa-MARCH7_0003	hsa_circ_0056841	hsa_circ_14554	hsa-circRNA4666-20	HSA_CIRCpedia_38358	exon	44627	-1.2865	0.00292135
chr1:78167054|78178966	hsa-USP33_0019	-	-	hsa-circRNA8568-4	HSA_CIRCpedia_32927	exon	USP33	-1.28664	0.00111467
chr12:14599922|14610229	hsa-ATF7IP_0012	hsa_circ_0025511	hsa_circ_09524	hsa-circRNA1692-2	HSA_CIRCpedia_70818	exon	ATF7IP	-1.28975	0.0118198
chr9:118982216|119033695	hsa-PAPPA_0008	hsa_circ_0088222	-	hsa-circRNA7785-45	HSA_CIRCpedia_62455	exon	PAPPA	-1.29301	0.0394183
chr22:38895405|38897285	hsa-DDX17_0003	hsa_circ_0001230	hsa_circ_27947	hsa-circRNA13344-9	HSA_CIRCpedia_36686	exon	DDX17	-1.29482	0.000945607
chr12:32900010|32900297	hsa-YARS2_0001	-	-	hsa-circRNA9881	HSA_CIRCpedia_70973	exon	YARS2	-1.29497	0.0017712
chr5:78952781|78964851	hsa-PAPD4_0015	hsa_circ_0008517	hsa_circ_29175	hsa-circRNA6339-39	HSA_CIRCpedia_52758	exon	PAPD4	-1.30739	0.000698746
chr2:61597456|61597714	hsa-USP34_0075	hsa_circ_0006729	hsa_circ_20075	hsa-circRNA12520-37	HSA_CIRCpedia_41883	exon	USP34	-1.30805	0.00267778
chr1:62907159|62907970	hsa-USP1_0004	-	hsa_circ_29585	hsa-circRNA322-6	HSA_CIRCpedia_32643	exon	USP1	-1.31594	0.00121103
chr8:42780700|42798588	hsa-HOOK3_0004	hsa_circ_0005376	hsa_circ_09865	hsa-circRNA7439-35	HSA_CIRCpedia_61148	exon	HOOK3	-1.32205	0.000772829
chrX:147007058|147027136	hsa-FMR1_0004	-	hsa_circ_02343	hsa-circRNA8164-8	HSA_CIRCpedia_56768	exon	FMR1	-1.32678	0.00117945
chr9:110062422|110068928	hsa-RAD23B_0003	hsa_circ_0087855	hsa_circ_19251	hsa-circRNA7761-17	HSA_CIRCpedia_62129	exon	RAD23B	-1.32732	0.0315717
chr1:47834141|47840965	hsa-CMPK1_0001	hsa_circ_0008201	hsa_circ_24705	hsa-circRNA285-3	HSA_CIRCpedia_32203	exon	CMPK1	-1.33596	0.0362152
chr10:52220433|52226692	hsa-SGMS1_0010	hsa_circ_0018402	-	hsa-circRNA9132-8	HSA_CIRCpedia_1812	exon	SGMS1	-1.3371	0.0248946
chr7:77200395|77230123	hsa-PTPN12_0010	hsa_circ_0080835	hsa_circ_06035	hsa-circRNA7132-17	HSA_CIRCpedia_59016	exon	PTPN12	-1.34199	0.0490478
chr10:97098890|97127456	hsa-SORBS1_0011	-	hsa_circ_06392	-	HSA_CIRCpedia_119995	exon	SORBS1	-1.34234	0.000154226
chr2:8910800|8917022	hsa-KIDINS220_0008	hsa_circ_0005315	hsa_circ_27158	hsa-circRNA12401-12	HSA_CIRCpedia_42572	exon	KIDINS220	-1.34554	0.0281226
chr3:4452549|4461830	hsa-SUMF1_0001	hsa_circ_0001260	hsa_circ_04987	hsa-circRNA13417-13	HSA_CIRCpedia_45701	exon	SUMF1,MRPS10P2	-1.34828	0.0445431
chr5:31995682|32010588	hsa-PDZD2_0005	-	hsa_circ_21583	hsa-circRNA6230	HSA_CIRCpedia_51553	exon	PDZD2	-1.34858	0.0248946
chr18:2951053|2960847	hsa-LPIN2_0002	hsa_circ_0007238	hsa_circ_16791	hsa-circRNA11751-3	HSA_CIRCpedia_23675	exon	LPIN2	-1.36713	0.0324033
chr4:48686690|48712715	hsa-FRYL_0091	hsa_circ_0002021	hsa_circ_10038	hsa-circRNA13998-36	HSA_CIRCpedia_48774	exon	FRYL	-1.36796	0.0443836
chr10:34620045|34649187	hsa-PARD3_0009	hsa_circ_0002487	hsa_circ_21806	hsa-circRNA9102-18	HSA_CIRCpedia_1549	exon	PARD3	-1.36942	0.000541516
chr4:153874651|153875471	hsa-FHDC1_0005	-	hsa_circ_27888	hsa-circRNA6145	HSA_CIRCpedia_47775	exon	FHDC1	-1.37302	0.00138888
chr5:25297812|25299169	hsa-RP11-184E9_0002	-	-	-	HSA_CIRCpedia_158492	exon	RP11-184E9.1	-1.37421	0.0232472
chr14:65896934|65922436	hsa-FUT8_0018	-	-	hsa-circRNA2337-4	HSA_CIRCpedia_358823	exon	FUT8	-1.37811	0.00214448
chr12:5841686|5916534	hsa-ANO2_0011	-	-	-	HSA_CIRCpedia_347814	exon	ANO2	-1.37912	0.000238843
chr7:8043538|8110761	hsa-GLCCI1_0001	-	hsa_circ_01553	hsa-circRNA6995-1	HSA_CIRCpedia_59087	exon	GLCCI1,RPA3-AS1	-1.38432	0.0370278
chr14:76642966|76662315	hsa-GPATCH2L_0014	hsa_circ_0032746	hsa_circ_17694	hsa-circRNA2385-21	HSA_CIRCpedia_13166	exon	GPATCH2L	-1.38433	0.00160487
chr18:23895193|23915195	hsa-TAF4B_0009	hsa_circ_0047322	-	hsa-circRNA3635-15	HSA_CIRCpedia_23560	exon	TAF4B	-1.38483	0.00139911
chr17:30692349|30695033	hsa-ZNF207_0003	-	-	hsa-circRNA3314-11	HSA_CIRCpedia_20177	exon	ZNF207	-1.38743	0.000451147
chr16:15973661|15978062	hsa-FOPNL_0001	hsa_circ_0003349	hsa_circ_00896	hsa-circRNA11013-4	HSA_CIRCpedia_16538	exon	FOPNL	-1.38952	0.000639139
chr4:169812073|169825057	hsa-PALLD_0001	hsa_circ_0006358	hsa_circ_14322	hsa-circRNA6167-2	HSA_CIRCpedia_47909	exon	PALLD	-1.39206	0.000261941
chr9:125639750|125659855	hsa-RC3H2_0001	hsa_circ_0088390	hsa_circ_10962	hsa-circRNA15916-3	HSA_CIRCpedia_62612	exon	RC3H2,SNORD90	-1.39523	0.00170396
chr4:103446669|103459113	hsa-NFKB1_0002	hsa_circ_0008012	hsa_circ_31891	hsa-circRNA6073-13	HSA_CIRCpedia_46991	exon	NFKB1	-1.39985	0.0447146
chr12:105255069|105289123	hsa-SLC41A2_0002	-	hsa_circ_20112	hsa-circRNA10094-10	HSA_CIRCpedia_6391	exon	SLC41A2	-1.39992	0.000226729
chr11:70505933|70507783	hsa-SHANK2_0001	-	hsa_circ_32340	hsa-circRNA9603-29	HSA_CIRCpedia_5439	exon	SHANK2	-1.40023	0.00441867
chr9:119028136|119065229	hsa-PAPPA_0116	-	-	hsa-circRNA7785-14	HSA_CIRCpedia_62460	exon	PAPPA	-1.40427	0.000206371
chr7:140494108|140508795	hsa-BRAF_0013	hsa_circ_0006961	hsa_circ_15858	hsa-circRNA15347-28	HSA_CIRCpedia_57089	exon	BRAF	-1.4071	0.000693955
chr3:169854207|169863309	hsa-PHC3_0009	hsa_circ_0001965	hsa_circ_11255	hsa-circRNA13823-22	HSA_CIRCpedia_44330	exon	PHC3	-1.40809	0.00292135
chr7:152007051|152027824	hsa-KMT2C_0009	hsa_circ_0083055	hsa_circ_17791	hsa-circRNA15380-93	HSA_CIRCpedia_57296	exon	KMT2C	-1.41727	0.0272509
chr6:105280917|105297121	hsa-HACE1_0041	hsa_circ_0077520	hsa_circ_08904	hsa-circRNA14852-35	HSA_CIRCpedia_53179	exon	RP11-809N15.2,HACE1	-1.42019	0.0323973
chr5:133534777|133541822	hsa-PPP2CA_0001	hsa_circ_0002602	hsa_circ_10393	hsa-circRNA14418-3	HSA_CIRCpedia_50199	exon	CDKL3,CTD-2410N18.5,PPP2CA,CTD-2410N18.4	-1.42175	0.000400773
chr22:38894090|38897285	hsa-DDX17_0007	hsa_circ_0063331	hsa_circ_30336	hsa-circRNA13344-5	HSA_CIRCpedia_36684	exon	DDX17	-1.42315	0.00022229
chr4:140037803|140060651	hsa-ELF2_0003	hsa_circ_0007710	-	hsa-circRNA14136-9	HSA_CIRCpedia_47470	exon	ELF2	-1.426	0.031838
chr19:52909160|52909896	hsa-ZNF528_0001	hsa_circ_0002115	hsa_circ_21165	hsa-circRNA4238-3	HSA_CIRCpedia_26567	exon	ZNF528	-1.42812	0.000151673
chrX:10031485|10035530	hsa-WWC3_0001	hsa_circ_0007685	hsa_circ_31855	hsa-circRNA7927-5	HSA_CIRCpedia_64900	exon	WWC3	-1.43023	0.0328008
chr1:92798948|92811471	hsa-RPAP2_0001	hsa_circ_0004463	hsa_circ_04609	hsa-circRNA388-3	HSA_CIRCpedia_33162	exon	RPAP2	-1.43045	0.0330265
chr8:72964774|72988862	hsa-MSC-AS1_0001	hsa_circ_0002503	-	hsa-circRNA7477-2	HSA_CIRCpedia_61658	exon	RP11-383H13.1	-1.43361	0.00959368
chr11:108046973|108047817	hsa-NPAT_0014	hsa_circ_0006208	hsa_circ_27111	hsa-circRNA9696-6	HSA_CIRCpedia_3123	exon	NPAT	-1.43382	0.0429675
chr4:4458918|4473433	hsa-STX18_0001	-	hsa_circ_31543	hsa-circRNA13935-1	HSA_CIRCpedia_68777	exon	STX18	-1.434	0.000170041
chr1:176524543|176526377	hsa-PAPPA2_0005	-	hsa_circ_24201	hsa-circRNA630-4	HSA_CIRCpedia_28920	exon	PAPPA2	-1.43586	0.0353985
chr18:60206914|60243885	hsa-ZCCHC2_0007	-	-	hsa-circRNA3696-13	HSA_CIRCpedia_24159	exon	ZCCHC2	-1.43843	0.00021085
chr13:41890982|41910892	hsa-NAA16_0006	hsa_circ_0030067	hsa_circ_28421	hsa-circRNA2115-20	HSA_CIRCpedia_10705	exon	NAA16	-1.45799	0.0212407
chrX:24828015|24844718	hsa-POLA1_0009	hsa_circ_0090160	hsa_circ_23451	hsa-circRNA7970-41	HSA_CIRCpedia_65707	exon	POLA1	-1.45943	0.000683831
chr12:79986391|79990438	hsa-PAWR_0006	-	-	hsa-circRNA10039-2	HSA_CIRCpedia_9655	exon	PAWR	-1.46518	0.00408027
chr6:132206071|132207864	hsa-ENPP1_0008	-	hsa_circ_13938	hsa-circRNA6901-15	HSA_CIRCpedia_53560	exon	ENPP1	-1.47086	0.0228647
chr2:242282407|242285664	hsa-SEPT2_0005	hsa_circ_0059061	hsa_circ_30915	hsa-circRNA4883-25	HSA_CIRCpedia_40342	exon	44806	-1.47584	0.00323914
chr10:127967484|128019078	hsa-ADAM12_0007	-	-	-	HSA_CIRCpedia_890	exon	ADAM12	-1.48285	0.0304675
chr11:34991686|35006275	hsa-PDHX_0018	hsa_circ_0000290	hsa_circ_24425	hsa-circRNA1290-15	HSA_CIRCpedia_4223	exon	PDHX	-1.48526	0.000162079
chr15:93552375|93563488	hsa-CHD2_0002	-	hsa_circ_21281	hsa-circRNA2740-13	HSA_CIRCpedia_16219	exon	CHD2	-1.48887	0.000109482
chr4:84391356|84393441	hsa-FAM175A_0006	hsa_circ_0009036	hsa_circ_07621	hsa-circRNA14053-3	HSA_CIRCpedia_49361	exon	FAM175A	-1.49861	0.000241871
chr14:58740697|58758425	hsa-PSMA3-AS1_0001	hsa_circ_0032077	hsa_circ_30250	hsa-circRNA10474-1	HSA_CIRCpedia_12513	exon	C14orf37,RP11-349A22.5	-1.50219	0.000328252
chr12:19436214|19436679	hsa-PLEKHA5_0023	hsa_circ_0003844	hsa_circ_12139	hsa-circRNA1701-25	HSA_CIRCpedia_7881	exon	PLEKHA5	-1.50892	5.21712e-05
chr2:24205766|24207701	hsa-UBXN2A_0002	hsa_circ_0003947	hsa_circ_27490	hsa-circRNA4350-5	HSA_CIRCpedia_40300	exon	UBXN2A	-1.5138	0.0288654
chr22:38083917|38084999	hsa-RP1-37E16_0001	hsa_circ_0004543	hsa_circ_14951	hsa-circRNA5320-6	HSA_CIRCpedia_36622	exon	NOL12	-1.5205	7.37568e-05
chr1:27267948|27268309	hsa-NUDC_0005	hsa_circ_0003940	hsa_circ_32045	hsa-circRNA151-5	HSA_CIRCpedia_31145	exon	NUDC	-1.5224	7.81727e-05
chr4:144336630|144336924	hsa-GAB1_0002	-	hsa_circ_20236	hsa-circRNA6129-8	HSA_CIRCpedia_47530	exon	GAB1	-1.52317	0.000644162
chr3:87017740|87027793	hsa-VGLL3_0002	-	-	-	-	exon	VGLL3	-1.52561	0.0161271
chr15:49319562|49329966	hsa-SECISBP2L_0001	hsa_circ_0035185	hsa_circ_32338	hsa-circRNA10714-6	HSA_CIRCpedia_14606	exon	SECISBP2L	-1.52932	0.028146
chr14:32586346|32621734	hsa-ARHGAP5_0007	hsa_circ_0005236	hsa_circ_30794	hsa-circRNA2252-6	HSA_CIRCpedia_11985	exon	ARHGAP5	-1.53208	0.000136104
chr5:93386436|93388932	hsa-FAM172A_0008	-	-	-	HSA_CIRCpedia_52995	exon	FAM172A	-1.53232	9.74532e-05
chr1:54389577|54405770	hsa-HSPB11_0001	-	-	-	HSA_CIRCpedia_69096	exon	HSPB11	-1.53367	0.000980082
chr4:156696120|156698794	hsa-GUCY1B3_0001	-	-	hsa-circRNA6151-1	HSA_CIRCpedia_103701	exon	GUCY1B3	-1.53853	0.00116515
chr12:109072048|109095099	hsa-CORO1C_0001	hsa_circ_0008081	hsa_circ_01525	hsa-circRNA10105-5	HSA_CIRCpedia_6490	exon	CORO1C	-1.55046	5.22866e-05
chr5:112336781|112337371	hsa-DCP2_0002	hsa_circ_0002462	hsa_circ_03842	hsa-circRNA6388-1	HSA_CIRCpedia_68681	exon	DCP2	-1.55191	4.28327e-05
chr9:19119648|19121163	hsa-PLIN2_0002	hsa_circ_0086455	-	hsa-circRNA15700-8	HSA_CIRCpedia_63655	exon	PLIN2	-1.55244	0.000567961
chr22:30366965|30375041	hsa-MTMR3_0004	hsa_circ_0006303	hsa_circ_08933	hsa-circRNA5285-13	HSA_CIRCpedia_36338	exon	MTMR3	-1.55469	0.000255499
chr16:74493580|74497377	hsa-GLG1_0030	hsa_circ_0003315	hsa_circ_30134	hsa-circRNA11179-25	HSA_CIRCpedia_18704	exon	GLG1	-1.55697	0.00185459
chr1:25124233|25153607	hsa-CLIC4_0001	hsa_circ_0005609	hsa_circ_06533	hsa-circRNA127-1	HSA_CIRCpedia_107387	exon	CLIC4	-1.5574	0.000142126
chr2:73675090|73682422	hsa-ALMS1_0009	hsa_circ_0055239	hsa_circ_26416	hsa-circRNA4495-29	HSA_CIRCpedia_42318	exon	ALMS1	-1.56049	0.00017781
chr6:111708968|111793343	hsa-REV3L_0003	hsa_circ_0077657	-	hsa-circRNA14877-38	HSA_CIRCpedia_53341	exon	REV3L	-1.56069	0.00017781
chr14:91110392|91252672	hsa-TTC7B_0039	-	hsa_circ_13994	hsa-circRNA10556-3	HSA_CIRCpedia_13375	exon	TTC7B	-1.56937	0.000261941
chrX:149807416|149832082	hsa-MTM1_0001	hsa_circ_0091682	hsa_circ_29032	hsa-circRNA8168-3	HSA_CIRCpedia_65341	exon	MTM1	-1.56993	0.000373234
chr1:65095038|65107652	hsa-CACHD1_0007	-	hsa_circ_06084	hsa-circRNA329-7	HSA_CIRCpedia_32726	exon	CACHD1	-1.57133	7.2472e-05
chr14:71867511|71884913	hsa-SIPA1L1_0032	hsa_circ_0002722	-	hsa-circRNA2355-36	HSA_CIRCpedia_12919	exon	SIPA1L1	-1.5728	5.94193e-05
chr18:9263788|9275665	hsa-ANKRD12_0021	hsa_circ_0046854	hsa_circ_18574	hsa-circRNA3600-18	HSA_CIRCpedia_24459	exon	ANKRD12	-1.57799	0.000212953
chr6:163876311|163956157	hsa-QKI_0001	-	hsa_circ_30631	hsa-circRNA6956-6	HSA_CIRCpedia_54288	exon	QKI	-1.57833	0.0155301
chr6:151116992|151122005	hsa-PLEKHG1_0002	hsa_circ_0078264	hsa_circ_19871	hsa-circRNA6933	HSA_CIRCpedia_53907	exon	PLEKHG1	-1.58394	0.0142929
chr2:230701564|230744844	hsa-TRIP12_0003	hsa_circ_0007381	hsa_circ_24308	hsa-circRNA12918-23	HSA_CIRCpedia_39958	exon	TRIP12	-1.5853	0.0404439
chr9:119124871|119130033	-	hsa_circ_0088255	-	hsa-circRNA7785-19	HSA_CIRCpedia_62478	exon	PAPPA	-1.59566	0.000261941
chr4:83787961|83788469	hsa-SEC31A_0002	hsa_circ_0070245	hsa_circ_18492	hsa-circRNA14048-20	HSA_CIRCpedia_49297	exon	SEC31A	-1.59584	0.0292174
chr12:49333438|49334971	hsa-ARF3_0002	hsa_circ_0003770	hsa_circ_03360	hsa-circRNA9918-7	HSA_CIRCpedia_8578	exon	RP11-302B13.5,ARF3,AC073610.5	-1.59665	9.74532e-05
chr17:38652239|38652772	hsa-TNS4_0001	-	-	hsa-circRNA11459-21	HSA_CIRCpedia_20610	exon	TNS4	-1.59695	0.0179795
chr9:118997418|118997916	hsa-PAPPA_0016	hsa_circ_0088227	-	hsa-circRNA7785-7	HSA_CIRCpedia_62457	exon	PAPPA	-1.59798	0.0122251
chr12:110463547|110467440	hsa-ANKRD13A_0006	hsa_circ_0009075	hsa_circ_32871	hsa-circRNA1973-5	HSA_CIRCpedia_6595	exon	ANKRD13A	-1.60015	7.62068e-05
chr10:94700484|94708136	hsa-EXOC6_0091	-	-	-	HSA_CIRCpedia_2807	exon	EXOC6	-1.60275	0.00674644
chr11:68369331|68370960	hsa-PPP6R3_0110	hsa_circ_0002417	hsa_circ_27154	hsa-circRNA1458-33	HSA_CIRCpedia_5345	exon	PPP6R3	-1.60601	0.0175479
chr4:160107794|160131735	hsa-RAPGEF2_0004	-	-	hsa-circRNA6159-15	HSA_CIRCpedia_47841	exon	RAPGEF2	-1.607	0.0241884
chr15:78837211|78838106	hsa-PSMA4_0002	hsa_circ_0003590	hsa_circ_26204	hsa-circRNA2684-4	HSA_CIRCpedia_15823	exon	PSMA4	-1.60859	0.000136104
chr14:53003437|53011089	hsa-TXNDC16_0021	hsa_circ_0031940	hsa_circ_07528	hsa-circRNA10457-2	HSA_CIRCpedia_12368	exon	TXNDC16	-1.61791	9.46514e-05
chr6:129799838|129802584	hsa-LAMA2_0024	-	hsa_circ_02972	hsa-circRNA6894-1	HSA_CIRCpedia_53505	exon	LAMA2	-1.61861	0.0302866
chr1:20063865|20073753	hsa-TMCO4_0008	hsa_circ_0004067	hsa_circ_05555	hsa-circRNA8339-1	HSA_CIRCpedia_29425	exon	TMCO4	-1.62113	0.0041567
chr5:80911292|80946158	hsa-SSBP2_0001	hsa_circ_0073222	hsa_circ_27184	hsa-circRNA14348-9	HSA_CIRCpedia_52848	exon	SSBP2	-1.62259	0.00462005
chr2:61712903|61717911	hsa-XPO1_0012	hsa_circ_0005050	hsa_circ_15008	hsa-circRNA12521-20	HSA_CIRCpedia_41914	exon	XPO1	-1.62471	0.000321661
chr2:230723488|230744844	hsa-TRIP12_0001	hsa_circ_0003273	hsa_circ_13401	hsa-circRNA12918-35	HSA_CIRCpedia_39961	exon	TRIP12	-1.62625	0.0082826
chr2:85782607|85783383	hsa-GGCX_0001	hsa_circ_0055426	hsa_circ_13027	hsa-circRNA12589-7	HSA_CIRCpedia_42448	exon	GGCX	-1.6265	0.0114
chr11:76224430|76239510	hsa-EMSY_0004	hsa_circ_0008189	hsa_circ_18180	hsa-circRNA1494-2	HSA_CIRCpedia_5667	exon	C11orf30	-1.63276	0.0157108
chr8:17400827|17401224	hsa-SLC7A2_0004	hsa_circ_0083429	hsa_circ_27387	hsa-circRNA7362-3	HSA_CIRCpedia_60454	exon	SLC7A2	-1.63311	0.000143921
chr10:127806607|127843874	hsa-ADAM12_0008	-	-	-	HSA_CIRCpedia_77175	exon	ADAM12,RNA5SP328	-1.63317	0.00959368
chr7:6452442|6456552	hsa-DAGLB_0007	hsa_circ_0006093	hsa_circ_23502	hsa-circRNA15028-6	HSA_CIRCpedia_58446	exon	DAGLB	-1.63961	2.67245e-05
chr3:50098389|50099541	hsa-RBM6_0020	hsa_circ_0006213	hsa_circ_30950	hsa-circRNA5571-62	HSA_CIRCpedia_46183	exon	RBM6	-1.65513	0.00117945
chr22:24698163|24720395	hsa-SPECC1L-ADORA2A_0001	-	hsa_circ_12144	hsa-circRNA5250-23	HSA_CIRCpedia_36136	exon	SPECC1L-ADORA2A,SPECC1L	-1.65588	9.46514e-05
chr9:88307604|88327481	hsa-AGTPBP1_0022	hsa_circ_0007351	hsa_circ_11990	hsa-circRNA15808-33	HSA_CIRCpedia_64582	exon	AGTPBP1	-1.66873	0.00381952
chr6:99887645|99913012	hsa-USP45_0039	hsa_circ_0077425	hsa_circ_27084	hsa-circRNA14848-9	HSA_CIRCpedia_55897	exon	USP45	-1.66945	0.00779689
chr17:40652725|40653322	hsa-ATP6V0A1_0008	hsa_circ_0008179	hsa_circ_31440	hsa-circRNA3364-26	HSA_CIRCpedia_20782	exon	ATP6V0A1	-1.67195	0.0203927
chr15:64495281|64497148	hsa-CTD-2116N17_0008	-	-	hsa-circRNA10773-2	HSA_CIRCpedia_15141	exon	CSNK1G1,CTD-2116N17.1	-1.67458	0.000136104
chr3:32180079|32181858	hsa-GPD1L_0002	-	hsa_circ_05938	hsa-circRNA5481-1	HSA_CIRCpedia_45318	exon	GPD1L	-1.6746	0.00086096
chr12:112303054|112308984	hsa-MAPKAPK5_0001	hsa_circ_0004466	hsa_circ_04104	hsa-circRNA1984-12	HSA_CIRCpedia_6751	exon	MAPKAPK5	-1.67658	0.00142707
chr5:68651476|68651780	hsa-AK6_0001	hsa_circ_0004081	hsa_circ_09376	hsa-circRNA14314-2	HSA_CIRCpedia_52319	exon	TAF9	-1.68789	1.79669e-05
chr10:93756126|93757508	hsa-BTAF1_0015	hsa_circ_0003584	hsa_circ_09390	hsa-circRNA1028-58	HSA_CIRCpedia_2746	exon	BTAF1	-1.69029	1.5766e-05
chr17:36517594|36533668	hsa-SOCS7_0004	hsa_circ_0005693	hsa_circ_14595	hsa-circRNA3329-6	HSA_CIRCpedia_20439	exon	SOCS7	-1.6903	1.23893e-05
chr17:61841376|61842207	hsa-CCDC47_0005	hsa_circ_0009168	hsa_circ_10479	hsa-circRNA11602-6	HSA_CIRCpedia_21970	exon	CCDC47	-1.69391	7.2472e-05
chr17:42160913|42161222	hsa-HDAC5_0006	hsa_circ_0044020	hsa_circ_31197	hsa-circRNA11507-18	HSA_CIRCpedia_20970	exon	HDAC5	-1.69482	0.0173388
chr18:60015401|60017170	hsa-TNFRSF11A_0001	hsa_circ_0047880	hsa_circ_19304	hsa-circRNA3694-1	HSA_CIRCpedia_24151	exon	TNFRSF11A	-1.70199	1.03223e-05
chr7:158566032|158591763	hsa-ESYT2_0052	hsa_circ_0083220	hsa_circ_20710	hsa-circRNA15390-36	HSA_CIRCpedia_57471	exon	ESYT2	-1.70245	0.0038234
chr10:225934|267296	hsa-ZMYND11_0002	hsa_circ_0008225	hsa_circ_27970	hsa-circRNA828-14	HSA_CIRCpedia_1234	exon	ZMYND11	-1.70937	0.0304675
chr14:96986392|96994343	hsa-PAPOLA_0004	hsa_circ_0002793	hsa_circ_27450	hsa-circRNA2423-23	HSA_CIRCpedia_13538	exon	PAPOLA	-1.7113	0.00755904
chr18:19144164|19148055	hsa-ESCO1_0013	hsa_circ_0009110	hsa_circ_04270	hsa-circRNA11771-17	HSA_CIRCpedia_23317	exon	ESCO1	-1.71227	0.0229004
chr17:67270084|67280213	hsa-ABCA5_0037	-	-	hsa-circRNA11641-10	HSA_CIRCpedia_22236	exon	ABCA5	-1.71654	0.000400773
chr8:92364038|92382061	hsa-SLC26A7_0003	-	-	-	HSA_CIRCpedia_166340	exon	SLC26A7	-1.72001	1.28465e-05
chr11:33127113|33127610	hsa-CSTF3_0012	hsa_circ_0000283	hsa_circ_27435	hsa-circRNA9448-7	HSA_CIRCpedia_4131	exon	CSTF3	-1.72306	0.0154594
chr19:45781181|45781873	hsa-MARK4_0004	hsa_circ_0000941	hsa_circ_07150	hsa-circRNA4144-24	HSA_CIRCpedia_26153	exon	MARK4	-1.72495	0.0029362
chr1:108138834|108152587	hsa-VAV3_0030	-	-	-	-	exon	VAV3	-1.72926	7.9002e-05
chr2:72945232|72968598	hsa-EXOC6B_0001	hsa_circ_0002864	hsa_circ_27024	hsa-circRNA12557-42	HSA_CIRCpedia_42271	exon	EXOC6B	-1.73082	0.0116381
chr7:47520701|47568745	hsa-TNS3_0006	hsa_circ_0080189	-	hsa-circRNA15132-62	HSA_CIRCpedia_58203	exon	TNS3	-1.74142	0.000181059
chr5:38991051|39003724	hsa-RICTOR_0018	hsa_circ_0006157	hsa_circ_23280	hsa-circRNA14267-14	HSA_CIRCpedia_51816	exon	RICTOR	-1.75356	0.00156255
chr11:46515158|46515754	hsa-AMBRA1_0003	hsa_circ_0009155	hsa_circ_01790	hsa-circRNA9468-38	HSA_CIRCpedia_4448	exon	AMBRA1	-1.7615	0.0132127
chr12:121853962|121855714	hsa-RNF34_0005	hsa_circ_0004513	hsa_circ_18816	hsa-circRNA2016-4	HSA_CIRCpedia_7195	exon	RNF34	-1.76183	0.00215382
chr3:133666100|133667815	hsa-SLCO2A1_0002	-	-	hsa-circRNA13754-2	HSA_CIRCpedia_43630	exon	SLCO2A1	-1.76419	0.00890621
chr11:129979324|129980556	hsa-APLP2_0009	hsa_circ_0000372	hsa_circ_08682	hsa-circRNA1610-16	HSA_CIRCpedia_3740	exon	APLP2	-1.80171	1.51176e-05
chr11:76670023|76709865	hsa-ACER3_0009	hsa_circ_0003320	hsa_circ_07630	hsa-circRNA1496-4	HSA_CIRCpedia_5676	exon	ACER3	-1.80365	0.00979462
chr6:128643184|128643455	hsa-PTPRK_0003	hsa_circ_0077817	hsa_circ_00878	hsa-circRNA14902-25	HSA_CIRCpedia_53499	exon	PTPRK	-1.80554	0.000261941
chr12:40422103|40442012	hsa-SLC2A13_0004	hsa_circ_0007918	hsa_circ_16505	hsa-circRNA9890-7	HSA_CIRCpedia_8386	exon	SLC2A13	-1.80841	0.00700699
chr1:207930359|207940540	hsa-CD46_0001	-	hsa_circ_23376	hsa-circRNA723-7	HSA_CIRCpedia_29711	exon	CD46,RP11-454L1.2	-1.80979	1.03223e-05
chr10:127797162|127806793	hsa-ADAM12_0011	-	-	-	-	exon	ADAM12	-1.81762	1.51176e-05
chr9:112704966|112705661	hsa-PALM2-AKAP2_0001	-	-	hsa-circRNA7763-3	HSA_CIRCpedia_62213	exon	AKAP2,PALM2,PALM2-AKAP2	-1.81805	0.000693955
chr9:113163134|113171231	hsa-SVEP1_0026	-	-	-	HSA_CIRCpedia_125647	exon	SVEP1	-1.82531	6.41395e-06
chr1:118003111|118009049	hsa-MAN1A2_0016	hsa_circ_0013744	-	hsa-circRNA471-10	HSA_CIRCpedia_27495	exon	MAN1A2	-1.83184	0.00650648
chr1:67405711|67428843	hsa-MIER1_0003	-	-	hsa-circRNA337-6	HSA_CIRCpedia_32821	exon	MIER1	-1.83776	4.67484e-06
chr5:137320946|137356886	hsa-FAM13B_0003	-	hsa_circ_14450	hsa-circRNA14431-33	HSA_CIRCpedia_50352	exon	FAM13B	-1.83929	0.000202623
chr11:9308002|9321248	hsa-TMEM41B_0003	hsa_circ_0021156	hsa_circ_09676	hsa-circRNA9409-7	HSA_CIRCpedia_6041	exon	TMEM41B	-1.8473	0.000283848
chr4:88011136|88036451	hsa-AFF1_0006	-	-	-	HSA_CIRCpedia_103317	exon	AFF1	-1.84966	0.000276074
chr4:140810511|140812121	hsa-MAML3_0001	-	hsa_circ_26779	hsa-circRNA14139-3	HSA_CIRCpedia_47496	exon	MAML3	-1.85088	1.03223e-05
chr1:52911459|52927441	hsa-ZCCHC11_0018	-	-	-	HSA_CIRCpedia_32344	exon	ZCCHC11	-1.8659	0.000767271
chr7:22330794|22357656	hsa-RAPGEF5_0006	hsa_circ_0001681	hsa_circ_11435	hsa-circRNA15054-8	HSA_CIRCpedia_57608	exon	RAPGEF5	-1.87279	0.00246929
chr5:32087237|32091281	hsa-PDZD2_0011	-	-	hsa-circRNA6232	HSA_CIRCpedia_51556	exon	PDZD2	-1.8741	3.02565e-05
chr11:123988204|123989796	hsa-VWA5A_0002	hsa_circ_0024737	hsa_circ_10241	hsa-circRNA1589-2	HSA_CIRCpedia_3591	exon	VWA5A	-1.87593	0.00172698
chr12:122812494|122812973	hsa-CLIP1_0036	-	-	-	HSA_CIRCpedia_119395	exon	CLIP1	-1.87738	6.71235e-05
chr3:171830242|171830380	hsa-FNDC3B_0010	hsa_circ_0067971	-	hsa-circRNA5805-15	HSA_CIRCpedia_44409	exon	FNDC3B	-1.88195	0.0144305
chr5:64863340|64868113	hsa-PPWD1_0007	hsa_circ_0072697	hsa_circ_23538	hsa-circRNA6285-8	HSA_CIRCpedia_52200	exon	PPWD1	-1.89291	0.00462005
chr1:149239868|149255307	hsa-RP11-403I13_0001	-	-	hsa-circRNA486-2	HSA_CIRCpedia_181611	exon	RP11-403I13.4	-1.89772	4.28327e-05
chr6:118832461|118887479	hsa-CEP85L_0027	hsa_circ_0077736	hsa_circ_07261	hsa-circRNA14891-7	HSA_CIRCpedia_53406	exon	CEP85L	-1.90287	0.00677134
chr1:54506429|54509198	hsa-TMEM59_0005	hsa_circ_0012634	hsa_circ_03779	hsa-circRNA8521-2	HSA_CIRCpedia_32469	exon	TMEM59	-1.91217	0.00724567
chr12:28408514|28544344	hsa-CCDC91_0047	-	-	hsa-circRNA1724-2	HSA_CIRCpedia_8164	exon	CCDC91	-1.9127	0.000347879
chr6:7181357|7189555	hsa-RREB1_0001	hsa_circ_0007429	hsa_circ_14372	hsa-circRNA6600-19	HSA_CIRCpedia_55441	exon	RREB1,RP11-405O10.2	-1.91424	0.0016044
chr10:11551594|11569566	hsa-USP6NL_0001	hsa_circ_0017688	hsa_circ_07696	hsa-circRNA9047-5	HSA_CIRCpedia_440	exon	USP6NL	-1.91793	1.03223e-05
chr3:149619859|149639014	hsa-RNF13_0003	hsa_circ_0005342	hsa_circ_08747	hsa-circRNA5772-3	HSA_CIRCpedia_43999	exon	RNF13	-1.92053	1.567e-05
chr1:19244856|19246267	hsa-IFFO2_0002	-	-	hsa-circRNA8330-10	HSA_CIRCpedia_29224	exon	RP13-279N23.2,IFFO2	-1.92162	5.22866e-05
chr5:31983261|31983762	hsa-PDZD2_0003	-	-	-	HSA_CIRCpedia_123383	exon	PDZD2	-1.92338	0.000169834
chr9:79829245|79842401	hsa-VPS13A_0023	hsa_circ_0087243	hsa_circ_02350	hsa-circRNA7697-54	HSA_CIRCpedia_64445	exon	VPS13A	-1.9264	5.94193e-05
chr10:95443813|95447206	hsa-FRA10AC1_0004	-	-	hsa-circRNA9223-4	HSA_CIRCpedia_2840	exon	FRA10AC1	-1.93044	0.000157738
chr1:243708812|243859018	hsa-AKT3_0027	-	hsa_circ_22676	hsa-circRNA9009-24	HSA_CIRCpedia_30938	exon	FABP7P1,AKT3	-1.93186	1.84695e-05
chr7:16705062|16736686	hsa-BZW2_0007	-	-	hsa-circRNA6998-14	HSA_CIRCpedia_57512	exon	BZW2	-1.93515	0.0267517
chr3:196118684|196120490	hsa-UBXN7_0018	hsa_circ_0005051	hsa_circ_20921	hsa-circRNA13890-11	HSA_CIRCpedia_45033	exon	UBXN7	-1.93967	0.000693955
chr1:21083659|21103243	hsa-HP1BP3_0008	hsa_circ_0004493	hsa_circ_06961	hsa-circRNA8345-14	HSA_CIRCpedia_29769	exon	HP1BP3	-1.94491	7.21507e-05
chr13:50279757|50280508	hsa-KPNA3_0014	hsa_circ_0007232	hsa_circ_20685	hsa-circRNA10295-18	HSA_CIRCpedia_10884	exon	KPNA3	-1.97289	0.000950771
chr17:34864901|34867294	hsa-MYO19_0001	hsa_circ_0003507	hsa_circ_30755	hsa-circRNA11433-20	HSA_CIRCpedia_20284	exon	MYO19	-1.98314	0.00014848
chr11:77386081|77404656	hsa-RSF1_0015	hsa_circ_0023701	hsa_circ_02564	hsa-circRNA9637-2	HSA_CIRCpedia_5714	exon	RSF1	-1.98418	1.11974e-05
chr9:119109305|119139926	hsa-PAPPA_0048	hsa_circ_0088252	-	hsa-circRNA7785-68	HSA_CIRCpedia_62473	exon	PAPPA	-1.98464	1.03223e-05
chr9:131024842|131025371	hsa-GOLGA2_0001	hsa_circ_0088761	-	hsa-circRNA15943-19	HSA_CIRCpedia_62946	exon	GOLGA2	-1.99118	0.00019338
chr3:149563798|149613357	hsa-RNF13_0010	hsa_circ_0003956	-	hsa-circRNA5772-28	HSA_CIRCpedia_43988	exon	RNF13	-1.99151	0.00196834
chr10:112711366|112724819	hsa-SHOC2_0012	-	-	-	HSA_CIRCpedia_77036	exon	SHOC2	-1.99301	1.03223e-05
chr10:112723883|112724819	hsa-SHOC2_0003	hsa_circ_0000261	hsa_circ_05516	hsa-circRNA1108-15	HSA_CIRCpedia_391	exon	SHOC2	-1.9946	0.00305325
chr15:93521464|93528903	hsa-CHD2_0008	hsa_circ_0036989	hsa_circ_20013	hsa-circRNA2740-46	HSA_CIRCpedia_16208	exon	CHD2	-1.99978	4.67484e-06
chr5:173337526|173380275	hsa-CPEB4_0002	hsa_circ_0075067	hsa_circ_27220	hsa-circRNA6543-2	HSA_CIRCpedia_102294	exon	CPEB4	-2.00016	1.28465e-05
chr9:140646783|140652463	hsa-EHMT1_0003	hsa_circ_0001904	hsa_circ_08219	hsa-circRNA7907-3	HSA_CIRCpedia_63527	exon	EHMT1	-2.00225	0.00690581
chr15:52338027|52342334	hsa-MAPK6_0001	-	hsa_circ_24573	hsa-circRNA2589-1	HSA_CIRCpedia_14751	exon	MAPK6	-2.00264	3.59741e-05
chr5:134010305|134011815	hsa-SEC24A_0033	hsa_circ_0004345	hsa_circ_06967	hsa-circRNA6437-58	HSA_CIRCpedia_50228	exon	SEC24A	-2.007	1.11974e-05
chr15:72810408|72848248	hsa-ARIH1_0027	hsa_circ_0000628	hsa_circ_07361	hsa-circRNA2646-2	HSA_CIRCpedia_15565	exon	ARIH1	-2.00753	1.11974e-05
chr1:151196721|151205179	hsa-PIP5K1A_0007	hsa_circ_0014118	-	hsa-circRNA508-4	HSA_CIRCpedia_27918	exon	PIP5K1A	-2.01456	7.02489e-05
chr17:8473038|8480656	hsa-MYH10_0002	hsa_circ_0042049	hsa_circ_32112	hsa-circRNA11335-31	HSA_CIRCpedia_23026	exon	MYH10	-2.01981	1.03223e-05
chr22:26059597|26070495	hsa-GRK3_0002	hsa_circ_0062649	hsa_circ_07168	hsa-circRNA5260-13	HSA_CIRCpedia_36184	exon	ADRBK2	-2.03065	3.38136e-06
chr8:30332295|30361953	hsa-RBPMS_0002	hsa_circ_0006539	hsa_circ_04713	hsa-circRNA7410-7	HSA_CIRCpedia_60828	exon	RBPMS	-2.03139	0.00234547
chr9:129102787|129148937	hsa-MVB12B_0008	hsa_circ_0088608	hsa_circ_30537	hsa-circRNA7801-1	HSA_CIRCpedia_62853	exon	MVB12B	-2.03634	7.2472e-05
chr5:96328719|96333849	hsa-LNPEP_0005	-	hsa_circ_03430	-	HSA_CIRCpedia_101426	exon	LNPEP	-2.03903	2.72551e-05
chr13:28830429|28855516	hsa-PAN3_0005	hsa_circ_0029853	hsa_circ_18944	hsa-circRNA2090-54	HSA_CIRCpedia_10487	exon	PAN3	-2.04337	0.00017781
chr19:8618023|8618321	hsa-MYO1F_0002	-	-	hsa-circRNA11962-7	HSA_CIRCpedia_144705	exon	MYO1F	-2.0523	5.28641e-06
chr21:40619627|40622815	hsa-BRWD1_0054	-	hsa_circ_18850	hsa-circRNA13191-93	HSA_CIRCpedia_35533	exon	BRWD1	-2.0631	0.0324042
chr5:78914470|78915906	hsa-PAPD4_0034	hsa_circ_0001503	-	hsa-circRNA6339-14	-	intron	PAPD4	-2.0681	4.86264e-06
chr2:143712379|143718339	hsa-KYNU_0001	-	-	-	HSA_CIRCpedia_69660	exon	KYNU	-2.08756	1.11974e-05
chr4:62800558|62801763	hsa-ADGRL3_0035	-	-	hsa-circRNA6007-7	HSA_CIRCpedia_48956	exon	LPHN3	-2.08843	0.00022229
chr22:18080960|18082861	hsa-ATP6V1E1_0001	hsa_circ_0062165	hsa_circ_13913	hsa-circRNA13229-5	HSA_CIRCpedia_35839	exon	ATP6V1E1	-2.08914	1.03223e-05
chr7:151261164|151265928	hsa-PRKAG2_0015	-	hsa_circ_30254	hsa-circRNA15378	HSA_CIRCpedia_57237	exon	PRKAG2	-2.09496	3.59741e-05
chr17:63739186|63746842	hsa-CEP112_0010	hsa_circ_0002910	hsa_circ_06402	hsa-circRNA11623-4	HSA_CIRCpedia_22083	exon	CEP112	-2.09747	1.45783e-05
chr18:46889531|46906128	hsa-DYM_0001	hsa_circ_0000849	hsa_circ_31001	hsa-circRNA11806-32	HSA_CIRCpedia_23935	exon	DYM	-2.10508	4.67484e-06
chr5:59982789|59983054	hsa-DEPDC1B_0011	hsa_circ_0072577	-	hsa-circRNA14303-2	HSA_CIRCpedia_52047	exon	DEPDC1B	-2.11625	0.00399072
chr9:20715321|20789607	hsa-FOCAD_0015	-	hsa_circ_11310	hsa-circRNA7629-3	HSA_CIRCpedia_63713	exon	SNORA30,FOCAD,MIR491	-2.12304	1.11974e-05
chr6:158349631|158357072	hsa-SNX9_0011	-	-	hsa-circRNA6943-6	HSA_CIRCpedia_54118	exon	SNX9,RNU6-786P	-2.14285	7.7667e-05
chr2:71788882|71791343	hsa-DYSF_0011	-	-	hsa-circRNA4488-4	HSA_CIRCpedia_42251	exon	DYSF	-2.15758	3.38136e-06
chr1:22041882|22048257	hsa-USP48_0005	hsa_circ_0000028	hsa_circ_12590	hsa-circRNA8352-24	HSA_CIRCpedia_30105	exon	USP48	-2.16702	0.00414045
chr8:54974814|54978373	hsa-LYPLA1_0003	hsa_circ_0003976	hsa_circ_26599	hsa-circRNA15493-3	HSA_CIRCpedia_61371	exon	LYPLA1	-2.17532	0.000143921
chr10:102697159|102703885	hsa-SLF2_0041	hsa_circ_0006409	hsa_circ_07836	hsa-circRNA1063-29	HSA_CIRCpedia_88	exon	FAM178A	-2.19795	2.41974e-05
chr15:50940884|50955243	hsa-TRPM7_0006	hsa_circ_0007775	hsa_circ_01027	hsa-circRNA10725-64	HSA_CIRCpedia_14681	exon	TRPM7	-2.21155	1.46803e-05
chr12:69983265|69985939	hsa-CCT2_0004	hsa_circ_0000418	hsa_circ_12599	hsa-circRNA1880-10	HSA_CIRCpedia_9492	exon	CCT2	-2.21558	0.00381952
chr10:103552596|103567658	hsa-MGEA5_0028	hsa_circ_0019606	hsa_circ_14073	hsa-circRNA9265-5	HSA_CIRCpedia_127	exon	MGEA5	-2.24455	0.000618744
chr9:33953283|33973235	hsa-UBAP2_0034	hsa_circ_0003141	hsa_circ_13501	hsa-circRNA15725-7	HSA_CIRCpedia_63928	exon	OSTCP8,UBAP2	-2.247	1.03223e-05
chr13:50025689|50042096	hsa-SETDB2_0004	hsa_circ_0030254	-	hsa-circRNA2135-11	HSA_CIRCpedia_10875	exon	SETDB2	-2.26026	0.00482662
chr8:68163534|68172161	hsa-ARFGEF1_0002	hsa_circ_0001807	hsa_circ_25531	hsa-circRNA15514-11	HSA_CIRCpedia_61566	exon	ARFGEF1	-2.26676	4.67484e-06
chr8:41832222|41845081	hsa-KAT6A_0002	hsa_circ_0084089	hsa_circ_32392	hsa-circRNA15481-1	HSA_CIRCpedia_61076	exon	KAT6A	-2.26861	4.86264e-06
chr11:82984690|82989872	hsa-CCDC90B_0004	-	hsa_circ_15256	hsa-circRNA9651-8	HSA_CIRCpedia_5828	exon	CCDC90B	-2.27298	1.79669e-05
chr21:35091102|35094956	hsa-ITSN1_0001	hsa_circ_0004248	hsa_circ_22375	hsa-circRNA5142-22	HSA_CIRCpedia_35319	exon	ITSN1	-2.27382	0.000105817
chr3:169694734|169703653	hsa-SEC62_0005	-	-	-	HSA_CIRCpedia_40438	exon	SEC62	-2.28075	5.28641e-06
chr17:45247283|45249430	hsa-CDC27_0018	hsa_circ_0044234	-	hsa-circRNA11531-14	HSA_CIRCpedia_21133	exon	CDC27	-2.30102	1.09757e-05
chr14:35487898|35488280	hsa-SRP54_0001	hsa_circ_0031647	-	hsa-circRNA2258-12	HSA_CIRCpedia_12032	exon	SRP54	-2.32199	1.03223e-05
chr18:9931807|9950565	hsa-VAPA_0002	hsa_circ_0046909	hsa_circ_16521	hsa-circRNA3606-3	HSA_CIRCpedia_24512	exon	VAPA	-2.34412	1.25819e-05
chr6:99912480|99916494	hsa-USP45_0010	hsa_circ_0004999	hsa_circ_03953	hsa-circRNA14848-19	HSA_CIRCpedia_55902	exon	USP45	-2.36601	1.03223e-05
chr10:116730127|116734144	hsa-TRUB1_0001	hsa_circ_0020092	hsa_circ_18377	hsa-circRNA1119-1	HSA_CIRCpedia_483	exon	TRUB1	-2.37699	4.86264e-06
chr15:56243574|56258744	hsa-NEDD4_0006	hsa_circ_0008340	hsa_circ_29183	hsa-circRNA10745-1	HSA_CIRCpedia_14838	exon	snoU13,NEDD4	-2.38007	0.0027665
chr1:161138783|161139814	hsa-PPOX_0001	hsa_circ_0014982	hsa_circ_04396	hsa-circRNA588-2	HSA_CIRCpedia_28462	exon	PPOX	-2.39727	1.5766e-05
chr15:68467975|68468992	hsa-PIAS1_0016	-	hsa_circ_30215	hsa-circRNA2633-11	HSA_CIRCpedia_15429	exon	PIAS1	-2.57936	3.38136e-06
chr2:183817133|183818059	hsa-NCKAP1_0007	hsa_circ_0002092	hsa_circ_22823	hsa-circRNA12804-43	HSA_CIRCpedia_38814	exon	NCKAP1	-2.6812	1.03223e-05
chr1:93142715|93170301	hsa-EVI5_0006	-	-	-	HSA_CIRCpedia_108868	exon	EVI5,RNU4-59P	-2.82354	1.28465e-05
chr7:72617463|72618644	hsa-GTF2IP4_0001	hsa_circ_0002284	hsa_circ_01949	hsa-circRNA7104-191	HSA_CIRCpedia_58699	exon	RP11-396K3.1	-2.99565	9.79975e-06
