# Supplementary material for: The landscape of circular RNA in preterm birth
Source: Front Immunol. 2022 Aug 22;13:879487. doi: 10.3389/fimmu.2022.879487 (PMC9441874; doi:10.3389/fimmu.2022.879487)
Supplement: Supplementary file 7 [file Table_6.xlsx]

## Sheet: Sheet1
Supplementary Table 6. DEC in cord blood of PTB
Position	CircAtlas ID	CircBase ID	CircRNADb ID	Deepbase2 ID	Circpedia2 ID	CircRNA Type	Host Gene	Log2FC	Adj.P.Val
chr1:95609447|95616975	hsa-TMEM56-RWDD3_0004	hsa_circ_0000095	hsa_circ_03283	hsa-circRNA398-1	HSA_CIRCpedia_33267	exon	TLCD4	10.512	6.34524e-35
chr2:9083316|9098771	hsa-MBOAT2_0001	hsa_circ_0007334	hsa_circ_15816	hsa-circRNA12402-17	HSA_CIRCpedia_42589	exon	MBOAT2	9.29744	7.90266e-19
chr5:72370569|72373320	hsa-FCHO2_0038	hsa_circ_0002490	hsa_circ_04905	hsa-circRNA6314-33	HSA_CIRCpedia_52515	exon	FCHO2	8.66785	1.61868e-30
chr1:95609447|95639445	hsa-TMEM56-RWDD3_0001	hsa_circ_0005720	hsa_circ_06744	hsa-circRNA398-2	HSA_CIRCpedia_33268	exon	TLCD4	8.1995	2.46231e-30
chr2:9048751|9098771	hsa-MBOAT2_0003	hsa_circ_0000972	hsa_circ_22272	hsa-circRNA12402-22	HSA_CIRCpedia_42586	exon	MBOAT2	7.55898	2.81848e-14
chr1:65830318|65831879	hsa-DNAJC6_0001	hsa_circ_0002454	hsa_circ_19407	hsa-circRNA332-7	HSA_CIRCpedia_32763	exon	DNAJC6	7.52466	7.26656e-11
chr8:21832181|21837714	hsa-XPO7_0033	-	hsa_circ_17984	hsa-circRNA7370-37	HSA_CIRCpedia_60570	exon	XPO7	7.4974	5.14191e-28
chr11:85707869|85714494	hsa-PICALM_0006	hsa_circ_0023919	hsa_circ_14065	hsa-circRNA9655-21	HSA_CIRCpedia_5890	exon	PICALM	7.0794	2.28155e-17
chr20:2944918|2945848	hsa-PTPRA_0004	hsa_circ_0006117	hsa_circ_16035	hsa-circRNA4905-26	HSA_CIRCpedia_33588	exon	PTPRA	7.01441	6.79879e-15
chr15:80412670|80415142	hsa-ZFAND6_0001	hsa_circ_0000643	hsa_circ_02432	hsa-circRNA2690-14	HSA_CIRCpedia_15848	exon	ZFAND6	6.84143	2.96822e-18
chr15:66044717|66053776	hsa-DENND4A_0007	hsa_circ_0035957	hsa_circ_11894	hsa-circRNA10790-2	HSA_CIRCpedia_15331	exon	DENND4A	6.82986	8.06407e-26
chr11:85707869|85742653	hsa-PICALM_0001	hsa_circ_0023923	hsa_circ_02064	hsa-circRNA9655-30	HSA_CIRCpedia_5894	exon	PICALM	6.76409	9.15409e-18
chr11:61133517|61135470	hsa-TMEM138_0003	hsa_circ_0002058	hsa_circ_04334	hsa-circRNA1346-9	HSA_CIRCpedia_4826	exon	TMEM138	6.7322	1.6762e-28
chr19:18648411|18649246	hsa-FKBP8_0001	hsa_circ_0000914	hsa_circ_26009	hsa-circRNA12100-5	HSA_CIRCpedia_25188	exon	FKBP8	6.68084	9.86345e-22
chr3:169863211|169867032	hsa-PHC3_0006	hsa_circ_0001360	hsa_circ_32092	hsa-circRNA13823-30	HSA_CIRCpedia_44334	exon	PHC3	6.65035	3.26414e-27
chr7:99621042|99621930	hsa-ZKSCAN1_0001	hsa_circ_0001727	hsa_circ_31593	hsa-circRNA7174-1	HSA_CIRCpedia_59516	exon	ZKSCAN1	6.5031	1.1664e-24
chr5:95091100|95099324	hsa-RHOBTB3_0011	hsa_circ_0007444	hsa_circ_19124	hsa-circRNA6364-34	HSA_CIRCpedia_53072	exon	RHOBTB3	6.48873	6.70997e-28
chr12:70193989|70195501	hsa-RAB3IP_0013	hsa_circ_0000419	hsa_circ_27724	hsa-circRNA1881-7	HSA_CIRCpedia_9499	exon	RAB3IP	6.46147	1.69528e-17
chr13:33091994|33101669	hsa-N4BP2L2_0001	hsa_circ_0000471	hsa_circ_12240	hsa-circRNA10242-11	HSA_CIRCpedia_10564	exon	N4BP2L2	6.29002	1.14742e-20
chr1:46105882|46108171	hsa-GPBP1L1_0001	hsa_circ_0008774	hsa_circ_13567	hsa-circRNA8489-21	HSA_CIRCpedia_32100	exon	GPBP1L1	6.24905	9.11748e-18
chr2:61749746|61761038	hsa-XPO1_0001	hsa_circ_0001017	hsa_circ_19966	hsa-circRNA12521-47	HSA_CIRCpedia_41959	exon	XPO1	6.2352	1.72605e-17
chr3:195785155|195787118	hsa-TFRC_0031	hsa_circ_0068610	hsa_circ_04842	hsa-circRNA13887-9	HSA_CIRCpedia_45000	exon	TFRC	6.21855	2.01067e-11
chr4:129913322|129925031	hsa-SCLT1_0002	hsa_circ_0001439	hsa_circ_23944	hsa-circRNA14131-7	HSA_CIRCpedia_47439	exon	SCLT1	6.21512	1.31986e-14
chr17:40652725|40653322	hsa-ATP6V0A1_0008	hsa_circ_0008179	hsa_circ_31440	hsa-circRNA3364-26	HSA_CIRCpedia_20782	exon	ATP6V0A1	6.20523	1.04428e-27
chr14:97299804|97327072	hsa-VRK1_0002	hsa_circ_0000566	hsa_circ_08594	hsa-circRNA2424-9	HSA_CIRCpedia_13554	exon	VRK1	6.02319	1.66202e-16
chr12:938228|939110	hsa-WNK1_0028	hsa_circ_0005616	-	hsa-circRNA1625-12	-	intron	WNK1	6.01947	9.14399e-12
chr12:109046048|109048186	hsa-CORO1C_0003	hsa_circ_0000437	hsa_circ_01619	hsa-circRNA10105-33	HSA_CIRCpedia_6479	exon	CORO1C	6.00675	8.79784e-18
chr2:227729320|227779067	hsa-RHBDD1_0003	hsa_circ_0058495	hsa_circ_31660	hsa-circRNA4829-5	HSA_CIRCpedia_39879	exon	RHBDD1	5.99229	1.81756e-21
chr11:130130751|130131824	hsa-ZBTB44_0001	hsa_circ_0002484	hsa_circ_02017	hsa-circRNA9784-3	HSA_CIRCpedia_3753	exon		5.97856	6.15661e-23
chr1:21102217|21102498	hsa-HP1BP3_0019	-	-	-	-	exon	HP1BP3	5.9461	2.13141e-20
chr1:21083659|21100103	hsa-HP1BP3_0004	hsa_circ_0000024	hsa_circ_02507	hsa-circRNA8345-11	HSA_CIRCpedia_29768	exon	HP1BP3	5.94504	9.18416e-29
chr11:57258697|57259335	hsa-SLC43A1_0001	hsa_circ_0005204	hsa_circ_20493	hsa-circRNA9492-2	HSA_CIRCpedia_4712	exon	SLC43A1	5.88933	8.00277e-22
chr15:63988323|64008672	hsa-HERC1_0035	hsa_circ_0035796	hsa_circ_03248	hsa-circRNA10768-75	HSA_CIRCpedia_15098	exon	HERC1	5.81889	2.45189e-21
chr9:128099297|128099870	hsa-GAPVD1_0019	hsa_circ_0003270	hsa_circ_23461	hsa-circRNA7799-17	HSA_CIRCpedia_62818	exon	GAPVD1	5.77063	7.66483e-14
chr3:196118684|196129890	hsa-UBXN7_0006	hsa_circ_0001380	hsa_circ_24576	hsa-circRNA13890-8	HSA_CIRCpedia_45034	exon	UBXN7	5.74948	2.71061e-23
chr15:89656956|89659752	hsa-ABHD2_0002	hsa_circ_0007099	hsa_circ_16970	hsa-circRNA2718-21	HSA_CIRCpedia_16024	exon	ABHD2	5.66595	6.17692e-16
chr4:39915231|39927553	hsa-PDS5A_0092	hsa_circ_0007308	hsa_circ_03062	hsa-circRNA13986-7	HSA_CIRCpedia_48598	exon	PDS5A	5.63381	2.62524e-16
chr4:178274462|178281831	hsa-NEIL3_0001	hsa_circ_0001460	hsa_circ_00262	hsa-circRNA6178-1	HSA_CIRCpedia_47994	exon	NEIL3	5.58517	3.35894e-16
chr15:66021410|66031213	hsa-DENND4A_0056	hsa_circ_0035944	hsa_circ_09974	hsa-circRNA10790-43	HSA_CIRCpedia_15322	exon	DENND4A	5.51398	1.6343e-15
chr8:131226802|131370389	hsa-ASAP1_0009	hsa_circ_0009126	hsa_circ_19125	hsa-circRNA15613-38	HSA_CIRCpedia_60093	exon	ASAP1	5.45495	1.82011e-17
chr11:16205432|16208501	hsa-SOX6_0009	hsa_circ_0021350	hsa_circ_15006	hsa-circRNA9424-10	HSA_CIRCpedia_3829	exon	SOX6	5.45421	3.07446e-16
chr16:1859239|1859834	hsa-HAGH_0002	-	-	hsa-circRNA10935-9	HSA_CIRCpedia_16718	exon	HAGH	5.44871	1.83091e-19
chr2:227729320|227732034	hsa-RHBDD1_0004	hsa_circ_0058493	hsa_circ_08240	hsa-circRNA4829-8	HSA_CIRCpedia_39877	exon	RHBDD1	5.43991	8.12462e-13
chr3:169854207|169867032	hsa-PHC3_0005	hsa_circ_0001359	hsa_circ_25738	hsa-circRNA13823-15	HSA_CIRCpedia_44331	exon	PHC3	5.43064	1.6255e-14
chr1:29362338|29365938	hsa-EPB41_0021	hsa_circ_0000042	hsa_circ_22064	hsa-circRNA173-29	HSA_CIRCpedia_31263	exon	EPB41	5.38001	1.677e-13
chr4:17816476|17816981	hsa-NCAPG_0005	hsa_circ_0001395	hsa_circ_31226	hsa-circRNA5936-6	HSA_CIRCpedia_47981	exon	NCAPG	5.36908	7.40116e-15
chr17:40650942|40653322	hsa-ATP6V0A1_0017	hsa_circ_0043837	hsa_circ_16659	hsa-circRNA3364-14	HSA_CIRCpedia_20781	exon	ATP6V0A1	5.33745	6.24034e-22
chr1:47745913|47748131	hsa-STIL_0005	hsa_circ_0000069	hsa_circ_08716	hsa-circRNA8500-2	HSA_CIRCpedia_32180	exon	STIL	5.30704	2.60909e-16
chr4:37633007|37640126	hsa-RELL1_0005	hsa_circ_0001400	hsa_circ_08846	hsa-circRNA13975-5	HSA_CIRCpedia_48457	exon	RELL1	5.30565	2.8784e-25
chr11:33307959|33309057	hsa-HIPK3_0001	hsa_circ_0000284	hsa_circ_24807	hsa-circRNA1281-1	HSA_CIRCpedia_4134	exon	HIPK3	5.26154	6.74437e-16
chr3:195780289|195803993	hsa-TFRC_0011	hsa_circ_0068606	hsa_circ_06856	hsa-circRNA13887-31	HSA_CIRCpedia_44995	exon	TFRC	5.25624	3.65967e-11
chr16:85667520|85667738	hsa-GSE1_0001	hsa_circ_0000722	hsa_circ_32674	hsa-circRNA3131-1	HSA_CIRCpedia_18957	exon	GSE1	5.22686	8.26473e-08
chr9:4860125|4860901	hsa-RCL1_0006	hsa_circ_0007592	hsa_circ_24558	hsa-circRNA7612-11	-	exon	RCL1	5.18642	1.41609e-14
chr14:21971316|21972024	hsa-METTL3_0002	hsa_circ_0000523	hsa_circ_06107	hsa-circRNA10376-18	HSA_CIRCpedia_11697	exon	METTL3	5.11737	9.85521e-16
chr1:185183639|185200840	hsa-SWT1_0003	hsa_circ_0004689	hsa_circ_12284	hsa-circRNA662-14	HSA_CIRCpedia_29192	exon	SWT1	5.10517	1.68296e-15
chr5:68470704|68471364	hsa-CCNB1_0001	hsa_circ_0001495	hsa_circ_29318	hsa-circRNA6297-4	HSA_CIRCpedia_52305	exon	CCNB1	5.09796	4.12235e-13
chr9:86297866|86301070	hsa-UBQLN1_0013	hsa_circ_0005142	hsa_circ_03862	hsa-circRNA15802-29	HSA_CIRCpedia_64537	exon	UBQLN1	5.04168	4.72701e-14
chr22:32874968|32875262	hsa-FBXO7_0003	hsa_circ_0008832	hsa_circ_23169	hsa-circRNA5303-5	HSA_CIRCpedia_36497	exon	FBXO7	5.01881	5.39661e-22
chr1:95603831|95639445	hsa-TMEM56_0002	-	-	-	-	intron	TLCD4	5.01391	1.97163e-13
chr21:37711077|37717005	hsa-MORC3_0001	hsa_circ_0001189	hsa_circ_26085	hsa-circRNA5148-25	-	exon	MORC3	4.9741	9.58938e-10
chr9:111812563|111812972	hsa-TMEM245_0013	hsa_circ_0087905	hsa_circ_18394	hsa-circRNA15871-62	HSA_CIRCpedia_62163	exon	TMEM245	4.92273	6.54393e-14
chr1:155408118|155429689	hsa-ASH1L_0028	hsa_circ_0003247	hsa_circ_04002	hsa-circRNA8777-18	HSA_CIRCpedia_28186	exon	ASH1L	4.90895	3.07446e-16
chr20:30954187|30956926	hsa-ASXL1_0001	hsa_circ_0001136	hsa_circ_10491	hsa-circRNA4972-10	HSA_CIRCpedia_33658	exon	ASXL1	4.88168	5.2075e-16
chr17:19921300|20013875	hsa-SPECC1_0018	-	-	hsa-circRNA3281-25	HSA_CIRCpedia_19687	exon	SPECC1	4.85854	1.27479e-11
chr16:68155890|68157024	hsa-NFATC3_0009	hsa_circ_0005615	hsa_circ_29465	hsa-circRNA3069-4	HSA_CIRCpedia_18255	exon	NFATC3	4.85501	4.72794e-12
chr5:122881111|122893258	hsa-CSNK1G3_0001	hsa_circ_0001522	hsa_circ_08140	hsa-circRNA6407-1	HSA_CIRCpedia_49956	exon	CSNK1G3	4.84776	2.6346e-15
chr12:116668338|116675510	hsa-MED13L_0024	hsa_circ_0000443	-	hsa-circRNA10134-57	-	intron	MED13L	4.83724	2.60909e-16
chr8:21835281|21837714	hsa-XPO7_0013	-	hsa_circ_04969	hsa-circRNA7370-9	HSA_CIRCpedia_60575	exon	XPO7	4.82644	5.56892e-16
chr19:18648411|18649243	hsa-FKBP8_0002	hsa_circ_0050119	hsa_circ_04865	hsa-circRNA12100-1	HSA_CIRCpedia_25187	exon	FKBP8	4.81663	6.92329e-15
chr16:58593708|58594266	hsa-CNOT1_0068	hsa_circ_0000705	-	hsa-circRNA11117-63	-	intron	CNOT1	4.76908	5.61097e-17
chr11:16117542|16119234	hsa-SOX6_0022	hsa_circ_0021346	-	hsa-circRNA9424-8	HSA_CIRCpedia_128164	exon	SOX6	4.7422	2.7318e-13
chr20:2928628|2945848	hsa-PTPRA_0018	hsa_circ_0005265	hsa_circ_24917	hsa-circRNA4905-24	HSA_CIRCpedia_33587	exon	PTPRA	4.73937	7.72056e-14
chr14:99924616|99932150	hsa-SETD3_0001	hsa_circ_0000567	hsa_circ_08702	hsa-circRNA10583-10	HSA_CIRCpedia_13569	exon	SETD3	4.73496	9.94187e-10
chr9:4823548|4827033	hsa-RCL1_0008	hsa_circ_0006345	hsa_circ_21192	hsa-circRNA7612-13	HSA_CIRCpedia_64212	exon	RCL1	4.71389	7.98826e-12
chr4:153332455|153333681	hsa-FBXW7_0005	hsa_circ_0001451	hsa_circ_16502	hsa-circRNA14160-17	HSA_CIRCpedia_47769	exon	FBXW7	4.70714	1.60865e-14
chr16:69404386|69406258	hsa-TERF2_0004	-	hsa_circ_32662	hsa-circRNA11152-2	HSA_CIRCpedia_18387	exon	TERF2	4.69842	7.03656e-11
chr21:17135210|17138460	hsa-USP25_0001	hsa_circ_0001178	hsa_circ_31658	hsa-circRNA5121-26	HSA_CIRCpedia_35061	exon	USP25	4.6767	5.25237e-11
chr16:68155890|68160513	hsa-NFATC3_0001	hsa_circ_0000711	hsa_circ_07065	hsa-circRNA3069-3	HSA_CIRCpedia_18256	exon	NFATC3	4.66653	9.03474e-10
chr9:33948372|33956144	hsa-UBAP2_0015	hsa_circ_0007367	hsa_circ_11822	hsa-circRNA15725-57	HSA_CIRCpedia_63921	exon	UBAP2	4.65143	1.80922e-21
chr9:86293356|86301070	hsa-UBQLN1_0006	hsa_circ_0087357	hsa_circ_04451	hsa-circRNA15802-6	HSA_CIRCpedia_64534	exon	UBQLN1	4.58692	3.02099e-16
chr10:51584616|51585599	-	-	hsa_circ_11813	hsa-circRNA926-25	HSA_CIRCpedia_76078	exon		4.57996	1.12428e-11
chr11:85685751|85695016	hsa-PICALM_0002	hsa_circ_0006629	hsa_circ_04345	hsa-circRNA9655-74	HSA_CIRCpedia_5855	exon	PICALM	4.56148	2.9058e-15
chr15:25650608|25657118	hsa-UBE3A_0005	hsa_circ_0000586	hsa_circ_32621	hsa-circRNA10624-13	HSA_CIRCpedia_13781	exon	UBE3A	4.54135	1.49488e-11
chr5:137320946|137324004	hsa-FAM13B_0019	hsa_circ_0001535	hsa_circ_11413	hsa-circRNA14431-37	HSA_CIRCpedia_50348	exon	FAM13B	4.53864	9.4717e-15
chr10:126631026|126631876	hsa-ZRANB1_0001	hsa_circ_0000268	hsa_circ_29422	hsa-circRNA1145-9	HSA_CIRCpedia_181134	exon	ZRANB1	4.52443	2.85974e-12
chr8:37623044|37623873	hsa-PROSC_0001	hsa_circ_0001788	hsa_circ_21066	hsa-circRNA7417-5	HSA_CIRCpedia_60919	exon	PLPBP	4.51947	6.01096e-11
chr4:87967318|87968746	hsa-AFF1_0001	hsa_circ_0001423	hsa_circ_27820	hsa-circRNA6050-2	HSA_CIRCpedia_49487	exon	AFF1	4.50296	6.84473e-11
chr10:89268093|89280926	hsa-MINPP1_0001	-	-	hsa-circRNA1016-2	HSA_CIRCpedia_2648	exon	MINPP1	4.4755	3.29394e-19
chr4:56277781|56284152	hsa-TMEM165_0001	hsa_circ_0001414	hsa_circ_28839	hsa-circRNA5994-9	HSA_CIRCpedia_48860	exon	TMEM165	4.47342	4.67357e-13
chr1:95603831|95616975	hsa-TMEM56_0003	-	-	-	-	intron	TLCD4	4.47314	5.04328e-13
chr15:41667910|41669502	hsa-NUSAP1_0010	hsa_circ_0002124	hsa_circ_03907	hsa-circRNA2536-6	HSA_CIRCpedia_14220	exon	NUSAP1	4.46566	5.05752e-13
chr5:138979957|138994551	hsa-UBE2D2_0003	hsa_circ_0005728	hsa_circ_06820	hsa-circRNA6460-10	HSA_CIRCpedia_50480	exon	UBE2D2	4.46045	2.41072e-13
chr7:158552177|158557544	hsa-ESYT2_0009	hsa_circ_0001776	hsa_circ_25060	hsa-circRNA15390-26	HSA_CIRCpedia_57466	exon	ESYT2	4.46005	1.44211e-18
chr1:21097423|21100103	hsa-HP1BP3_0016	hsa_circ_0005782	hsa_circ_31171	hsa-circRNA8345-13	HSA_CIRCpedia_29780	exon	HP1BP3	4.4523	4.32361e-13
chr11:85718585|85742653	hsa-PICALM_0007	hsa_circ_0023936	hsa_circ_03221	hsa-circRNA9655-51	HSA_CIRCpedia_5905	exon	PICALM	4.43971	1.43231e-10
chr14:53003437|53011089	hsa-TXNDC16_0021	hsa_circ_0031940	hsa_circ_07528	hsa-circRNA10457-2	HSA_CIRCpedia_12368	exon	TXNDC16	4.43664	1.92891e-15
chr2:71623271|71645769	hsa-ZNF638_0046	hsa_circ_0055151	hsa_circ_28941	hsa-circRNA4487-12	HSA_CIRCpedia_42246	exon	ZNF638	4.4016	3.21722e-15
chr17:1746097|1747980	hsa-RPA1_0002	hsa_circ_0005946	hsa_circ_07015	hsa-circRNA3174-11	HSA_CIRCpedia_19484	exon	RPA1	4.37944	3.27102e-13
chr10:70227880|70229920	hsa-DNA2_0001	hsa_circ_0006151	hsa_circ_07413	hsa-circRNA9158-45	HSA_CIRCpedia_2076	exon	DNA2	4.37574	6.11115e-19
chr11:85733410|85742653	hsa-PICALM_0009	hsa_circ_0023942	hsa_circ_12975	hsa-circRNA9655-3	HSA_CIRCpedia_5910	exon	PICALM	4.36808	6.60525e-16
chr2:15691617|15698758	hsa-NBAS_0006	hsa_circ_0003287	hsa_circ_13486	hsa-circRNA12412-182	HSA_CIRCpedia_38241	exon	NBAS	4.36718	1.88823e-11
chrX:13684436|13698717	hsa-TCEANC_0001	hsa_circ_0007717	-	hsa-circRNA7938-3	HSA_CIRCpedia_49440	exon	TCEANC	4.35545	1.90404e-12
chr9:88920107|88924932	hsa-ZCCHC6_0015	hsa_circ_0001869	hsa_circ_31273	hsa-circRNA15811-7	HSA_CIRCpedia_64612	exon	TUT7	4.33564	8.23499e-14
chr11:85685751|85742653	hsa-PICALM_0003	hsa_circ_0023891	hsa_circ_16629	hsa-circRNA9655-57	HSA_CIRCpedia_5863	exon	PICALM	4.33198	2.81013e-14
chr18:43319128|43319627	hsa-SLC14A1_0001	-	-	hsa-circRNA3660-2	HSA_CIRCpedia_88407	exon	SLC14A1	4.33151	1.717e-19
chr13:114265311|114277601	hsa-TFDP1_0002	hsa_circ_0031038	-	hsa-circRNA2198-18	HSA_CIRCpedia_10190	exon	TFDP1	4.3278	5.08313e-17
chr2:9079950|9098771	hsa-MBOAT2_0017	hsa_circ_0000973	-	hsa-circRNA12402-20	-	intron	MBOAT2	4.31237	1.03515e-12
chr5:167915607|167921655	hsa-RARS_0012	hsa_circ_0001550	hsa_circ_21209	hsa-circRNA6529-14	HSA_CIRCpedia_51048	exon	RARS1	4.30515	2.34631e-08
chr4:144464662|144465125	hsa-SMARCA5_0005	hsa_circ_0001445	hsa_circ_06025	hsa-circRNA6130-12	HSA_CIRCpedia_47541	exon	SMARCA5	4.29926	3.13627e-11
chr19:57967021|57967550	hsa-AC004076_0001	hsa_circ_0000963	hsa_circ_29625	hsa-circRNA12372-2	HSA_CIRCpedia_26690	exon		4.2972	6.97571e-10
chr5:153413351|153414527	hsa-FAM114A2_0004	hsa_circ_0001546	hsa_circ_18927	hsa-circRNA14490-4	HSA_CIRCpedia_50869	exon	FAM114A2	4.27345	4.85987e-20
chr7:80275968|80303463	hsa-CD36_0006	-	-	-	HSA_CIRCpedia_121631	exon	CD36	4.25542	5.34134e-17
chr1:205238078|205239012	hsa-TMCC2_0001	hsa_circ_0003344	hsa_circ_27337	hsa-circRNA706	HSA_CIRCpedia_29650	exon	TMCC2	4.22184	5.98804e-06
chr11:120276827|120278532	hsa-ARHGEF12_0003	hsa_circ_0024604	hsa_circ_27729	hsa-circRNA1579-33	HSA_CIRCpedia_3477	exon	ARHGEF12	4.19865	1.01983e-09
chr9:138773479|138774924	hsa-CAMSAP1_0001	hsa_circ_0001900	hsa_circ_09826	hsa-circRNA15984-3	HSA_CIRCpedia_63397	exon	CAMSAP1	4.18189	5.11105e-15
chr16:88061089|88071617	hsa-BANP_0012	hsa_circ_0040823	hsa_circ_28793	hsa-circRNA3136-3	HSA_CIRCpedia_19025	exon	BANP	4.16141	2.16988e-15
chr16:58594116|58594266	hsa-CNOT1_0028	hsa_circ_0007079	hsa_circ_27921	hsa-circRNA11117-77	HSA_CIRCpedia_18056	exon	CNOT1	4.15509	5.49222e-16
chr12:121220458|121222396	hsa-SPPL3_0001	hsa_circ_0003472	hsa_circ_04060	hsa-circRNA10161-2	HSA_CIRCpedia_7153	exon	SPPL3	4.15291	1.47574e-12
chr8:142264088|142264728	hsa-SLC45A4_0002	hsa_circ_0001829	-	hsa-circRNA15626	HSA_CIRCpedia_342085	exon	SLC45A4	4.15111	7.73472e-15
chr14:52977958|53011089	hsa-TXNDC16_0022	hsa_circ_0031939	hsa_circ_22908	hsa-circRNA10457-7	HSA_CIRCpedia_12367	exon	TXNDC16	4.14325	1.34204e-14
chr1:151139410|151139890	hsa-SCNM1_0001	hsa_circ_0000128	hsa_circ_22177	hsa-circRNA507-2	HSA_CIRCpedia_27910	exon	SCNM1	4.13543	6.17692e-16
chr2:9083316|9114564	hsa-MBOAT2_0039	-	-	hsa-circRNA12402-9	HSA_CIRCpedia_42590	exon	MBOAT2	4.12881	2.08468e-09
chr10:7839010|7844817	hsa-ATP5C1_0007	hsa_circ_0007292	hsa_circ_04997	hsa-circRNA844-7	HSA_CIRCpedia_2478	exon	ATP5F1C	4.1205	1.4971e-10
chr8:52773405|52773806	hsa-PCMTD1_0002	hsa_circ_0001801	hsa_circ_02918	hsa-circRNA15489-5	HSA_CIRCpedia_61337	exon	PCMTD1	4.11455	1.34442e-05
chr12:70149164|70150443	hsa-RAB3IP_0001	-	hsa_circ_14116	hsa-circRNA1881-5	HSA_CIRCpedia_9495	exon	RAB3IP	4.10476	4.23171e-12
chr6:17665470|17669777	hsa-NUP153_0004	hsa_circ_0007268	hsa_circ_32170	hsa-circRNA14605-33	HSA_CIRCpedia_54490	exon	NUP153	4.08536	2.27894e-19
chr20:39721112|39729993	hsa-TOP1_0001	-	hsa_circ_08396	hsa-circRNA5017-7	HSA_CIRCpedia_34215	exon	TOP1	4.08385	1.04319e-12
chr1:155646339|155649303	hsa-YY1AP1_0001	hsa_circ_0014606	hsa_circ_11093	hsa-circRNA8779-59	HSA_CIRCpedia_28207	exon	YY1AP1	4.07192	1.24264e-09
chr6:150092298|150094305	hsa-PCMT1_0004	hsa_circ_0006936	hsa_circ_28105	hsa-circRNA6931-14	HSA_CIRCpedia_53893	exon	PCMT1	4.02859	4.08856e-15
chr15:66044717|66048810	hsa-DENND4A_0010	hsa_circ_0035956	hsa_circ_01150	hsa-circRNA10790-22	HSA_CIRCpedia_15330	exon	DENND4A	4.02552	5.30476e-20
chr12:102107868|102110590	hsa-CHPT1_0001	hsa_circ_0006660	hsa_circ_24559	hsa-circRNA1938-2	HSA_CIRCpedia_6289	exon	CHPT1	4.02222	1.05086e-08
chr15:41961026|41962156	hsa-MGA_0049	hsa_circ_0000591	hsa_circ_01692	hsa-circRNA2540-32	HSA_CIRCpedia_14241	exon	MGA	4.00373	1.37873e-09
chr10:17746430|17747740	hsa-STAM_0008	hsa_circ_0008311	hsa_circ_26583	hsa-circRNA865-22	HSA_CIRCpedia_1150	exon	STAM	3.96618	1.56235e-11
chr7:131060183|131084192	hsa-MKLN1_0012	hsa_circ_0001746	hsa_circ_32002	hsa-circRNA7264-46	HSA_CIRCpedia_56719	exon	MKLN1	3.95506	9.01441e-16
chr15:66021410|66048810	hsa-DENND4A_0029	hsa_circ_0035946	hsa_circ_01948	hsa-circRNA10790-5	HSA_CIRCpedia_15323	exon	DENND4A	3.94812	3.47489e-15
chr4:88005272|88012981	hsa-AFF1_0007	hsa_circ_0070382	hsa_circ_19491	hsa-circRNA6050-26	HSA_CIRCpedia_49492	exon	AFF1	3.93167	1.18265e-14
chr6:57017019|57025950	hsa-ZNF451_0031	hsa_circ_0002638	hsa_circ_08736	hsa-circRNA6792-5	HSA_CIRCpedia_55345	exon	ZNF451	3.91718	3.07593e-23
chr1:231090079|231097049	hsa-TTC13_0001	hsa_circ_0000195	hsa_circ_27576	hsa-circRNA8986-20	HSA_CIRCpedia_30508	exon	TTC13	3.88462	1.31986e-14
chr14:50136242|50141145	hsa-POLE2_0001	hsa_circ_0004904	hsa_circ_26754	hsa-circRNA10441-4	HSA_CIRCpedia_12211	exon	POLE2	3.85526	2.17115e-20
chr2:58449077|58459247	hsa-FANCL_0001	hsa_circ_0001009	hsa_circ_27206	hsa-circRNA12516-21	HSA_CIRCpedia_41770	exon	FANCL	3.84336	8.25624e-12
chr22:26853825|26854543	hsa-HPS4_0001	hsa_circ_0005175	hsa_circ_28728	hsa-circRNA13274-1	HSA_CIRCpedia_36205	exon	HPS4	3.82967	3.49169e-14
chr13:28155434|28155940	hsa-LNX2_0001	hsa_circ_0029827	hsa_circ_18132	hsa-circRNA10232-1	HSA_CIRCpedia_10460	exon	LNX2	3.81928	3.83448e-18
chr5:72354260|72373320	hsa-FCHO2_0068	hsa_circ_0003571	hsa_circ_27723	hsa-circRNA6314-36	HSA_CIRCpedia_52510	exon	FCHO2	3.8159	8.11772e-15
chr10:126097111|126100769	hsa-OAT_0002	hsa_circ_0008898	hsa_circ_22993	hsa-circRNA9325-1	HSA_CIRCpedia_819	exon	OAT	3.80526	1.46598e-12
chr4:178274462|178274882	hsa-NEIL3_0002	hsa_circ_0001459	hsa_circ_07536	hsa-circRNA6178-9	HSA_CIRCpedia_47993	exon	NEIL3	3.79773	9.55114e-09
chr16:11114050|11154879	hsa-CLEC16A_0007	hsa_circ_0000672	hsa_circ_01477	hsa-circRNA2854-27	HSA_CIRCpedia_16300	exon	CLEC16A	3.78543	1.28279e-13
chr5:65284463|65290692	hsa-ERBIN_0001	hsa_circ_0001492	hsa_circ_18609	hsa-circRNA6289-16	HSA_CIRCpedia_52227	exon	ERBIN	3.78036	6.90576e-15
chr5:176370336|176385155	hsa-UIMC1_0001	hsa_circ_0001558	hsa_circ_14064	hsa-circRNA14536-9	HSA_CIRCpedia_51249	exon	UIMC1	3.77265	2.41765e-11
chr21:30693542|30702014	hsa-BACH1_0001	hsa_circ_0001181	hsa_circ_06547	hsa-circRNA5132-6	HSA_CIRCpedia_35162	exon	BACH1	3.76873	2.4264e-12
chr22:41521868|41536261	hsa-EP300_0036	-	hsa_circ_17921	hsa-circRNA5346-54	HSA_CIRCpedia_36805	exon	EP300	3.76848	2.06667e-21
chr16:3900298|3901010	hsa-CREBBP_0001	hsa_circ_0007637	hsa_circ_01293	hsa-circRNA10960-39	HSA_CIRCpedia_17571	exon	CREBBP	3.73367	1.22381e-12
chr4:79747191|79772210	hsa-BMP2K_0004	hsa_circ_0070190	hsa_circ_31036	hsa-circRNA6037-16	HSA_CIRCpedia_49241	exon	BMP2K	3.71535	1.89995e-09
chr2:148730308|148733544	hsa-ORC4_0007	hsa_circ_0001074	hsa_circ_29247	hsa-circRNA12723-3	HSA_CIRCpedia_38063	exon	ORC4	3.70116	6.95258e-16
chr9:96233423|96261168	hsa-FAM120A_0006	hsa_circ_0001875	hsa_circ_27396	hsa-circRNA7721-39	HSA_CIRCpedia_64725	exon	FAM120A	3.69679	5.18698e-13
chr9:33948372|33953472	hsa-UBAP2_0014	hsa_circ_0003496	hsa_circ_32282	hsa-circRNA15725-82	HSA_CIRCpedia_63920	exon	UBAP2	3.69318	1.33826e-14
chr10:11639630|11643979	hsa-USP6NL_0021	hsa_circ_0003978	-	hsa-circRNA9047-15	-	intron	USP6NL	3.68928	2.47677e-10
chr18:12999420|13019205	hsa-CEP192_0029	hsa_circ_0000831	hsa_circ_26363	hsa-circRNA3617-44	HSA_CIRCpedia_23199	exon		3.68838	1.58454e-07
chr14:50130033|50141145	hsa-POLE2_0012	hsa_circ_0008002	hsa_circ_14715	hsa-circRNA10441-25	HSA_CIRCpedia_12203	exon	POLE2	3.68722	6.09068e-09
chr12:100676721|100691953	hsa-SCYL2_0001	hsa_circ_0006258	hsa_circ_05659	hsa-circRNA1930-1	HSA_CIRCpedia_6239	exon	SCYL2	3.67701	2.12547e-09
chr8:101299729|101300495	hsa-RNF19A_0002	hsa_circ_0085128	hsa_circ_31552	hsa-circRNA15562-12	HSA_CIRCpedia_59632	exon	RNF19A	3.67427	2.47993e-09
chr4:103225474|103236987	hsa-SLC39A8_0001	hsa_circ_0002782	hsa_circ_10382	hsa-circRNA14084-7	HSA_CIRCpedia_46985	exon	SLC39A8	3.66288	6.83184e-19
chr7:28141238|28144689	hsa-JAZF1_0003	-	-	-	-	intron	JAZF1	3.65538	1.07176e-10
chr1:43300709|43304592	hsa-ERMAP_0001	-	-	hsa-circRNA239-1	-	exon	ERMAP	3.63403	1.18391e-12
chr5:56542127|56546968	hsa-GPBP1_0005	hsa_circ_0072547	hsa_circ_03597	hsa-circRNA6276-21	HSA_CIRCpedia_52024	exon	GPBP1	3.62377	5.22474e-13
chr4:77055328|77065626	hsa-NUP54_0020	hsa_circ_0070039	hsa_circ_29866	hsa-circRNA14035-5	HSA_CIRCpedia_49136	exon	NUP54	3.60655	1.74332e-12
chr10:70218861|70229920	hsa-DNA2_0014	hsa_circ_0009172	hsa_circ_26730	hsa-circRNA9158-17	HSA_CIRCpedia_2073	exon	DNA2	3.60151	5.47708e-13
chr1:21076216|21100103	hsa-HP1BP3_0002	hsa_circ_0000023	hsa_circ_15956	hsa-circRNA8345-7	HSA_CIRCpedia_29765	exon	HP1BP3	3.60149	1.79265e-15
chr11:85701293|85742653	hsa-PICALM_0010	hsa_circ_0023918	hsa_circ_01810	hsa-circRNA9655-15	HSA_CIRCpedia_5888	exon	PICALM	3.5752	3.84347e-12
chr9:96233423|96238620	hsa-FAM120A_0002	hsa_circ_0008193	hsa_circ_10936	hsa-circRNA7721-41	HSA_CIRCpedia_64723	exon	FAM120A	3.57246	1.6343e-15
chr9:33971649|33973235	hsa-UBAP2_0013	hsa_circ_0001851	hsa_circ_17341	hsa-circRNA15725-70	HSA_CIRCpedia_63943	exon	UBAP2	3.5685	6.30036e-16
chr1:94360170|94363454	hsa-GCLM_0004	hsa_circ_0013222	hsa_circ_22741	hsa-circRNA8609-1	HSA_CIRCpedia_33238	exon	GCLM	3.55938	7.68625e-16
chr1:158624601|158624741	hsa-SPTA1_0001	-	-	-	-	intron	SPTA1	3.55409	4.00038e-17
chr13:51501543|51523641	hsa-RNASEH2B_0001	hsa_circ_0000489	hsa_circ_19478	hsa-circRNA2142-7	HSA_CIRCpedia_10912	exon	RNASEH2B	3.54165	1.27643e-10
chr4:160107794|160164943	hsa-RAPGEF2_0005	-	-	-	-	exon	RAPGEF2	3.53979	2.78077e-20
chr17:20107646|20109225	hsa-SPECC1_0001	hsa_circ_0000745	hsa_circ_15640	hsa-circRNA3281-32	HSA_CIRCpedia_19689	exon	SPECC1	3.53838	5.79216e-07
chr7:32672155|32718742	hsa-DPY19L1P1_0001	-	-	hsa-circRNA15085-4	HSA_CIRCpedia_57882	exon	DPY19L1P1	3.53435	1.37076e-16
chr1:205585606|205593019	hsa-ELK4_0002	hsa_circ_0000175	hsa_circ_26738	hsa-circRNA8916-3	HSA_CIRCpedia_29657	exon	ELK4	3.52783	8.99961e-09
chr2:24046128|24046439	hsa-ATAD2B_0031	hsa_circ_0003828	hsa_circ_09269	hsa-circRNA12422-38	HSA_CIRCpedia_40231	exon	ATAD2B	3.52117	3.09393e-12
chr3:197592294|197602646	hsa-LRCH3_0003	hsa_circ_0008351	hsa_circ_09631	hsa-circRNA5865-40	HSA_CIRCpedia_45149	exon	LRCH3	3.51768	2.24343e-10
chr12:1003728|1006847	hsa-WNK1_0027	hsa_circ_0003251	hsa_circ_26062	hsa-circRNA1625-3	HSA_CIRCpedia_6220	exon	WNK1	3.51232	9.79466e-16
chr2:144966170|144969146	hsa-GTDC1_0018	hsa_circ_0001072	hsa_circ_30539	hsa-circRNA12719-5	HSA_CIRCpedia_38052	exon	GTDC1	3.50727	1.4971e-10
chr3:56694759|56707753	hsa-FAM208A_0001	hsa_circ_0001315	hsa_circ_14881	hsa-circRNA13601-29	HSA_CIRCpedia_46460	exon	TASOR	3.50211	2.36955e-14
chr20:45905058|45916028	hsa-ZMYND8_0005	hsa_circ_0004212	hsa_circ_13414	hsa-circRNA13084-24	HSA_CIRCpedia_34437	exon	ZMYND8	3.49588	5.61911e-12
chr15:64791492|64792365	hsa-ZNF609_0001	hsa_circ_0000615	-	hsa-circRNA2613-8	-	exon		3.4804	2.07895e-11
chr8:141595218|141616013	hsa-AGO2_0015	hsa_circ_0007313	-	hsa-circRNA15623-5	-	intron	AGO2	3.45698	2.06667e-21
chr22:22160139|22162135	hsa-MAPK1_0001	hsa_circ_0008870	hsa_circ_32713	hsa-circRNA13256-14	HSA_CIRCpedia_36057	exon	MAPK1	3.44955	3.70157e-13
chr20:45891032|45905539	hsa-ZMYND8_0004	hsa_circ_0007026	hsa_circ_28513	hsa-circRNA13084-1	HSA_CIRCpedia_34427	exon	ZMYND8	3.43738	3.00354e-12
chr7:99090663|99092254	hsa-ZNF789_0001	hsa_circ_0001726	-	hsa-circRNA15224	-	intron	ZNF789	3.42268	2.18544e-15
chr16:69729039|69729282	hsa-NFAT5_0039	hsa_circ_0006845	hsa_circ_16704	hsa-circRNA3086-5	HSA_CIRCpedia_18410	exon	NFAT5	3.40435	1.76129e-20
chr7:80292306|80303463	hsa-CD36_0007	-	-	-	HSA_CIRCpedia_150391	exon	CD36	3.40127	3.11755e-16
chr9:4823548|4833228	hsa-RCL1_0007	hsa_circ_0006134	hsa_circ_04570	hsa-circRNA7612-6	HSA_CIRCpedia_64213	exon	RCL1	3.39433	1.31345e-10
chr9:33953283|33963789	hsa-UBAP2_0051	hsa_circ_0001847	hsa_circ_30156	hsa-circRNA15725-14	HSA_CIRCpedia_63927	exon	UBAP2	3.39358	1.44874e-12
chr13:95768176|95840796	hsa-ABCC4_0028	hsa_circ_0030582	hsa_circ_14768	hsa-circRNA10329-26	HSA_CIRCpedia_11215	exon	ABCC4	3.39005	1.00048e-18
chr13:95813443|95840796	hsa-ABCC4_0070	hsa_circ_0030586	hsa_circ_32309	hsa-circRNA10329-64	HSA_CIRCpedia_11222	exon	ABCC4	3.38951	1.50357e-12
chr7:155465561|155473602	hsa-RBM33_0009	hsa_circ_0001772	hsa_circ_24570	hsa-circRNA7330-7	HSA_CIRCpedia_57339	exon	RBM33	3.38856	2.2533e-07
chr6:13639795|13644961	hsa-RANBP9_0002	hsa_circ_0001578	hsa_circ_04363	hsa-circRNA14601-5	HSA_CIRCpedia_53641	exon	RANBP9	3.38687	7.46491e-15
chr7:131071879|131084192	hsa-MKLN1_0001	hsa_circ_0001747	hsa_circ_12612	hsa-circRNA7264-6	HSA_CIRCpedia_56725	exon	MKLN1	3.38314	6.60525e-16
chr17:60061532|60062451	hsa-MED13_0006	hsa_circ_0002220	hsa_circ_26268	hsa-circRNA11597-21	HSA_CIRCpedia_21867	exon	MED13	3.38142	1.37128e-25
chr12:50385781|50386438	hsa-RACGAP1_0007	hsa_circ_0009035	hsa_circ_19394	hsa-circRNA9929-28	HSA_CIRCpedia_8641	exon	RACGAP1	3.37639	1.32674e-12
chr9:6420912|6434173	hsa-UHRF2_0004	hsa_circ_0002359	hsa_circ_16335	hsa-circRNA7618-7	HSA_CIRCpedia_64265	exon	UHRF2	3.37212	6.95599e-15
chr5:72374007|72378652	hsa-FCHO2_0039	hsa_circ_0072979	hsa_circ_26383	hsa-circRNA6314-20	HSA_CIRCpedia_52519	exon	FCHO2	3.35101	2.06667e-21
chr3:8977555|8983488	hsa-RAD18_0002	hsa_circ_0001264	hsa_circ_05206	hsa-circRNA13422-3	HSA_CIRCpedia_46827	exon	RAD18	3.35046	2.72508e-15
chr16:88008654|88017865	hsa-BANP_0011	hsa_circ_0040809	hsa_circ_00547	hsa-circRNA3136-6	HSA_CIRCpedia_19008	exon	BANP	3.34538	4.79655e-20
chr1:212218002|212220759	hsa-DTL_0003	hsa_circ_0000179	hsa_circ_05803	hsa-circRNA733-21	HSA_CIRCpedia_29852	exon	DTL	3.34217	3.97231e-13
chr11:85722073|85742653	hsa-PICALM_0008	hsa_circ_0000347	hsa_circ_10091	hsa-circRNA9655-46	HSA_CIRCpedia_5907	exon	PICALM	3.33665	2.451e-08
chr5:179976931|179980471	hsa-CNOT6_0011	hsa_circ_0008836	hsa_circ_25034	hsa-circRNA6575-10	HSA_CIRCpedia_51456	exon	CNOT6	3.33361	3.96082e-15
chr18:60206914|60217693	hsa-ZCCHC2_0018	hsa_circ_0000854	hsa_circ_22204	hsa-circRNA3696-8	HSA_CIRCpedia_24157	exon	ZCCHC2	3.3329	5.762e-16
chr2:9083316|9102747	hsa-MBOAT2_0042	-	-	-	-	intron	MBOAT2	3.3314	5.51272e-09
chr6:42630996|42633983	hsa-UBR2_0080	hsa_circ_0002906	hsa_circ_27821	hsa-circRNA6756-52	HSA_CIRCpedia_55009	exon	UBR2	3.32851	1.1675e-19
chr2:178096617|178098999	hsa-NFE2L2_0003	-	-	-	-	exon	NFE2L2	3.3267	5.1208e-14
chr19:41089304|41089623	hsa-SHKBP1_0002	hsa_circ_0000936	hsa_circ_29229	hsa-circRNA4091-12	HSA_CIRCpedia_25946	exon	SHKBP1	3.32396	1.36046e-11
chr12:120995085|120995485	hsa-RNF10_0004	hsa_circ_0028899	hsa_circ_26020	hsa-circRNA2010-32	HSA_CIRCpedia_7134	exon	RNF10	3.32014	5.11221e-22
chrX:134679348|134690225	hsa-INTS6L_0001	-	hsa_circ_07329	hsa-circRNA8156-9	HSA_CIRCpedia_65270	exon	INTS6L	3.31764	2.23667e-10
chr13:28748409|28752072	hsa-PAN3_0025	hsa_circ_0004372	hsa_circ_18755	hsa-circRNA2090-33	HSA_CIRCpedia_10462	exon	PAN3	3.31617	4.83644e-14
chr2:227729320|227732404	hsa-RHBDD1_0012	-	-	hsa-circRNA4829-4	-	intron	RHBDD1	3.31163	1.09392e-10
chr12:112641440|112666615	hsa-HECTD4_0128	-	hsa_circ_06611	hsa-circRNA10125-8	HSA_CIRCpedia_6818	exon	HECTD4	3.30384	2.60263e-10
chr12:56997143|56999111	hsa-BAZ2A_0002	hsa_circ_0004843	hsa_circ_19854	hsa-circRNA9992-8	HSA_CIRCpedia_9086	exon	BAZ2A	3.29483	1.63822e-13
chr17:45247283|45249430	hsa-CDC27_0018	hsa_circ_0044234	-	hsa-circRNA11531-14	HSA_CIRCpedia_21133	exon	CDC27	3.28819	1.72233e-10
chr8:41518948|41519459	hsa-ANK1_0002	hsa_circ_0001792	hsa_circ_09415	hsa-circRNA15479-9	HSA_CIRCpedia_61065	exon	ANK1	3.28498	9.25725e-11
chr8:37971710|37976881	hsa-ASH2L_0010	hsa_circ_0001790	hsa_circ_26279	hsa-circRNA7420-7	HSA_CIRCpedia_60944	exon	ASH2L	3.28495	1.21276e-12
chr8:21832181|21845368	hsa-XPO7_0021	-	-	-	HSA_CIRCpedia_160490	exon	XPO7	3.28148	2.74618e-11
chr15:80390758|80415142	hsa-ZFAND6_0002	hsa_circ_0000642	hsa_circ_13324	hsa-circRNA2690-4	HSA_CIRCpedia_15844	exon	ZFAND6	3.27716	2.02276e-16
chr15:66007816|66053776	hsa-DENND4A_0030	-	hsa_circ_24645	hsa-circRNA10790-42	HSA_CIRCpedia_83470	exon	DENND4A	3.2767	1.87943e-11
chr22:50810449|50832564	hsa-PPP6R2_0011	hsa_circ_0001258	hsa_circ_07544	hsa-circRNA5395-12	HSA_CIRCpedia_37159	exon	PPP6R2	3.27589	2.13141e-20
chr15:66007816|66031213	hsa-DENND4A_0092	hsa_circ_0035937	-	hsa-circRNA10790-8	HSA_CIRCpedia_15316	exon	DENND4A	3.27438	4.09291e-20
chr18:12999420|13030607	hsa-CEP192_0028	-	hsa_circ_04934	hsa-circRNA3617-76	HSA_CIRCpedia_23200	exon		3.264	7.36693e-12
chr1:32381496|32385259	hsa-PTP4A2_0001	hsa_circ_0007364	hsa_circ_22452	hsa-circRNA8409-4	HSA_CIRCpedia_31375	exon	PTP4A2	3.26238	2.35121e-21
chr22:41531817|41536261	hsa-EP300_0003	hsa_circ_0003184	hsa_circ_15557	hsa-circRNA5346-53	HSA_CIRCpedia_36813	exon	EP300	3.26022	1.25073e-16
chr9:126519982|126641300	hsa-DENND1A_0004	hsa_circ_0002544	hsa_circ_07610	hsa-circRNA15918-8	HSA_CIRCpedia_62709	exon	DENND1A	3.24582	9.86345e-22
chr9:33948372|33948585	hsa-UBAP2_0077	hsa_circ_0002976	hsa_circ_01498	hsa-circRNA15725-62	HSA_CIRCpedia_63919	exon	UBAP2	3.24107	2.54734e-19
chr8:103372299|103373854	hsa-UBR5_0001	hsa_circ_0001819	hsa_circ_19504	hsa-circRNA15570-114	HSA_CIRCpedia_59733	exon	UBR5	3.23973	9.56266e-17
chr14:23378692|23380612	hsa-RBM23_0007	hsa_circ_0000524	hsa_circ_14272	hsa-circRNA10380-4	HSA_CIRCpedia_11721	exon	RBM23	3.23112	0.000187577
chr14:73614503|73614802	hsa-PSEN1_0011	hsa_circ_0008521	hsa_circ_20873	hsa-circRNA2361-3	HSA_CIRCpedia_12974	exon	PSEN1	3.22804	6.7968e-12
chr8:141582911|141595410	hsa-AGO2_0006	hsa_circ_0002965	hsa_circ_09792	hsa-circRNA15623-28	HSA_CIRCpedia_60190	exon	AGO2	3.22522	4.48045e-16
chr8:29959414|29962002	hsa-LEPROTL1_0002	hsa_circ_0007353	hsa_circ_10933	hsa-circRNA7407-6	HSA_CIRCpedia_60824	exon	LEPROTL1	3.22106	1.44099e-12
chr14:21698478|21702388	hsa-HNRNPC_0001	hsa_circ_0003643	hsa_circ_18300	hsa-circRNA10372-1	HSA_CIRCpedia_11667	exon	HNRNPC	3.21821	3.48104e-13
chr13:28830429|28835595	hsa-PAN3_0004	hsa_circ_0008902	hsa_circ_11884	hsa-circRNA2090-37	HSA_CIRCpedia_10482	exon	PAN3	3.21568	3.54162e-13
chrY:2947325|2970235	hsa-LINC00278_0001	-	-	hsa-circRNA8217	-	exon	LINC00278	3.21385	4.8564e-05
chr12:112757029|112757546	hsa-HECTD4_0001	hsa_circ_0002584	hsa_circ_07132	hsa-circRNA10125-18	HSA_CIRCpedia_6872	exon	HECTD4	3.21097	1.64171e-13
chr17:59853762|59857762	hsa-BRIP1_0034	hsa_circ_0006968	hsa_circ_19739	hsa-circRNA11595-15	HSA_CIRCpedia_21802	exon	BRIP1	3.21097	4.15912e-16
chr8:41561559|41563759	hsa-ANK1_0008	hsa_circ_0084083	hsa_circ_16645	hsa-circRNA15479-2	HSA_CIRCpedia_61070	exon	ANK1	3.20918	2.00647e-23
chr14:31371742|31380368	hsa-STRN3_0016	hsa_circ_0031433	hsa_circ_03334	hsa-circRNA10414-11	HSA_CIRCpedia_11850	exon	STRN3	3.20159	4.32361e-13
chr1:9991949|9994918	hsa-LZIC_0003	hsa_circ_0000014	hsa_circ_31394	hsa-circRNA8290-2	HSA_CIRCpedia_33327	exon	LZIC	3.19414	2.6671e-14
chr11:120916383|120930794	hsa-TBCEL_0004	hsa_circ_0003302	hsa_circ_28834	hsa-circRNA1581-5	HSA_CIRCpedia_3522	exon		3.18815	4.40402e-08
chr9:139115609|139118720	hsa-QSOX2_0001	-	-	hsa-circRNA15988-7	HSA_CIRCpedia_63410	exon	QSOX2	3.18301	6.28966e-11
chr17:1746097|1756483	hsa-RPA1_0001	hsa_circ_0000734	hsa_circ_18693	hsa-circRNA3174-33	HSA_CIRCpedia_19485	exon	RPA1	3.17932	3.20427e-09
chr5:109049221|109051965	hsa-MAN2A1_0002	hsa_circ_0008058	hsa_circ_25584	hsa-circRNA6380-46	HSA_CIRCpedia_49796	exon	MAN2A1	3.1769	2.43498e-14
chr2:61749746|61753656	hsa-XPO1_0002	hsa_circ_0001016	hsa_circ_30308	hsa-circRNA12521-94	HSA_CIRCpedia_41958	exon	XPO1	3.17434	2.4621e-11
chr4:170501993|170511960	hsa-NEK1_0027	hsa_circ_0071434	hsa_circ_22469	hsa-circRNA14187-15	HSA_CIRCpedia_47938	exon	NEK1	3.17353	6.38444e-12
chr7:7273934|7283381	hsa-C1GALT1_0002	hsa_circ_0001675	hsa_circ_00095	hsa-circRNA6989-1	-	exon	C1GALT1	3.17076	5.19699e-15
chr10:105197772|105198565	hsa-PDCD11_0002	hsa_circ_0000258	hsa_circ_31661	hsa-circRNA1090-50	HSA_CIRCpedia_308	exon	PDCD11	3.16965	2.48185e-21
chr6:56989532|57006893	hsa-ZNF451_0002	hsa_circ_0007587	hsa_circ_07937	hsa-circRNA6792-7	HSA_CIRCpedia_55337	exon	ZNF451	3.16799	2.71044e-12
chr16:148143|150507	hsa-NPRL3_0003	hsa_circ_0037130	hsa_circ_14762	hsa-circRNA10909-27	HSA_CIRCpedia_16453	exon	NPRL3	3.16251	2.18585e-13
chr6:158994452|159010814	hsa-TMEM181_0003	hsa_circ_0004587	hsa_circ_30149	hsa-circRNA6946-15	HSA_CIRCpedia_54172	exon	TMEM181	3.15974	4.56496e-16
chr3:195791180|195796439	hsa-TFRC_0032	-	-	hsa-circRNA13887-56	HSA_CIRCpedia_45007	exon	TFRC	3.15565	4.02533e-12
chr5:56160561|56161804	hsa-MAP3K1_0003	hsa_circ_0001485	hsa_circ_27020	hsa-circRNA6274-6	HSA_CIRCpedia_52006	exon	MAP3K1	3.15307	2.66959e-09
chr19:5047487|5082515	hsa-KDM4B_0007	hsa_circ_0002926	hsa_circ_28403	hsa-circRNA3796-37	HSA_CIRCpedia_26496	exon	KDM4B	3.14536	9.70059e-16
chr8:131249168|131370389	hsa-ASAP1_0027	hsa_circ_0085614	-	hsa-circRNA15613-8	HSA_CIRCpedia_60096	exon	ASAP1	3.14457	1.0363e-19
chr15:41648237|41669502	hsa-NUSAP1_0005	hsa_circ_0008346	hsa_circ_14097	hsa-circRNA2536-15	HSA_CIRCpedia_14216	exon	NUSAP1	3.14429	0.000147432
chr3:149563798|149639014	hsa-RNF13_0008	hsa_circ_0001346	hsa_circ_02426	hsa-circRNA5772-22	HSA_CIRCpedia_43991	exon	RNF13	3.14281	3.64366e-08
chr3:56626998|56628056	hsa-CCDC66_0010	hsa_circ_0001313	hsa_circ_19154	hsa-circRNA5605-2	HSA_CIRCpedia_46448	exon	CCDC66	3.13853	1.75664e-10
chr1:15964802|15970145	hsa-DDI2_0008	hsa_circ_0000019	hsa_circ_18547	hsa-circRNA80-23	HSA_CIRCpedia_28390	exon	DDI2	3.13475	1.32693e-13
chr20:54956489|54961589	hsa-AURKA_0001	hsa_circ_0008777	hsa_circ_03316	hsa-circRNA13111-1	HSA_CIRCpedia_34793	exon	AURKA	3.12868	2.98892e-15
chr12:69983265|69985939	hsa-CCT2_0004	hsa_circ_0000418	hsa_circ_12599	hsa-circRNA1880-10	HSA_CIRCpedia_9492	exon	CCT2	3.12853	1.4271e-09
chr9:88284400|88327481	hsa-AGTPBP1_0001	hsa_circ_0087391	hsa_circ_08531	hsa-circRNA15808-18	HSA_CIRCpedia_64576	exon	AGTPBP1	3.1267	5.2075e-16
chr17:30315339|30315516	hsa-SUZ12_0028	hsa_circ_0007085	hsa_circ_01646	hsa-circRNA3310-55	HSA_CIRCpedia_20128	exon	SUZ12	3.12545	1.79265e-15
chr9:114148657|114154104	hsa-KIAA0368_0046	hsa_circ_0001882	hsa_circ_11666	hsa-circRNA15879-9	HSA_CIRCpedia_62244	exon	ECPAS	3.12299	3.55024e-15
chr8:124089351|124132428	hsa-TBC1D31_0005	hsa_circ_0085441	hsa_circ_19836	hsa-circRNA7550-14	HSA_CIRCpedia_59950	exon	TBC1D31	3.12286	8.15568e-16
chr10:27431316|27434519	hsa-YME1L1_0002	hsa_circ_0005633	hsa_circ_02114	hsa-circRNA9085-9	HSA_CIRCpedia_1350	exon	YME1L1	3.11708	1.58043e-11
chr4:88005272|88016121	hsa-AFF1_0008	-	-	hsa-circRNA6050-22	HSA_CIRCpedia_49493	exon	AFF1	3.11318	2.13141e-20
chr3:31617888|31621588	hsa-STT3B_0002	hsa_circ_0001278	hsa_circ_18286	hsa-circRNA5479-8	HSA_CIRCpedia_45286	exon	STT3B	3.11281	1.26812e-10
chr11:120276827|120280159	hsa-ARHGEF12_0001	hsa_circ_0024605	hsa_circ_25573	hsa-circRNA1579-12	HSA_CIRCpedia_3478	exon	ARHGEF12	3.11067	5.18231e-10
chr10:70497602|70502326	hsa-CCAR1_0064	hsa_circ_0006272	hsa_circ_15321	hsa-circRNA949-49	HSA_CIRCpedia_2114	exon	CCAR1	3.10572	1.11418e-22
chr2:172782047|172809519	hsa-HAT1_0006	hsa_circ_0008032	hsa_circ_19101	hsa-circRNA4694-1	HSA_CIRCpedia_38620	exon	HAT1	3.10319	3.72344e-10
chr8:124089351|124117704	hsa-TBC1D31_0034	hsa_circ_0085439	hsa_circ_02906	hsa-circRNA7550-13	HSA_CIRCpedia_59948	exon	TBC1D31	3.10247	6.60525e-16
chr15:50592986|50593565	hsa-GABPB1_0008	hsa_circ_0002551	hsa_circ_00293	hsa-circRNA10723-5	HSA_CIRCpedia_14633	exon	GABPB1	3.10139	8.10571e-13
chr13:42040959|42042974	hsa-RGCC_0001	-	-	hsa-circRNA2116	HSA_CIRCpedia_10714	exon	RGCC	3.09678	7.17117e-11
chr3:183705558|183732235	hsa-ABCC5_0002	-	-	hsa-circRNA13851-3	HSA_CIRCpedia_148316	exon	ABCC5	3.09586	5.762e-16
chr11:120345269|120348235	hsa-ARHGEF12_0041	hsa_circ_0002100	hsa_circ_22027	hsa-circRNA1579-65	HSA_CIRCpedia_3510	exon	ARHGEF12	3.09289	1.03028e-14
chr4:39739040|39757359	hsa-UBE2K_0004	hsa_circ_0009154	hsa_circ_32828	hsa-circRNA5968-11	HSA_CIRCpedia_48546	exon	UBE2K	3.089	5.55948e-13
chr21:46275125|46281186	hsa-PTTG1IP_0002	hsa_circ_0001200	hsa_circ_29713	hsa-circRNA13215-12	HSA_CIRCpedia_35701	exon	PTTG1IP	3.08783	2.47307e-11
chr2:201721405|201721708	hsa-CLK1_0011	hsa_circ_0004001	hsa_circ_01253	hsa-circRNA12836-5	HSA_CIRCpedia_39111	exon	CLK1	3.08639	5.3851e-11
chr7:65592691|65599361	hsa-AC068533_0001	hsa_circ_0004604	hsa_circ_22367	hsa-circRNA7092-2	HSA_CIRCpedia_58520	exon		3.07092	1.15378e-13
chr16:18809247|18810156	hsa-RP11-1035H13_0001	hsa_circ_0004833	hsa_circ_32564	hsa-circRNA11024-7	HSA_CIRCpedia_16729	exon	ARL6IP1	3.06566	5.57854e-07
chr8:71071740|71075089	hsa-NCOA2_0026	hsa_circ_0001810	hsa_circ_24170	hsa-circRNA15517-12	HSA_CIRCpedia_61630	exon	NCOA2	3.06473	1.1659e-15
chr9:130206308|130207528	hsa-ZNF79_0004	hsa_circ_0006984	hsa_circ_09175	hsa-circRNA7808	-	exon	ZNF79	3.06091	7.40116e-15
chr21:37619815|37620866	hsa-DOPEY2_0008	hsa_circ_0001187	hsa_circ_00537	hsa-circRNA5147-38	HSA_CIRCpedia_35373	exon	DOP1B	3.06046	1.09212e-11
chr5:49694941|49707217	hsa-EMB_0005	hsa_circ_0001481	hsa_circ_11947	hsa-circRNA14282-2	-	exon	EMB	3.05494	1.25724e-12
chr2:64083440|64085070	hsa-UGP2_0001	hsa_circ_0001020	hsa_circ_08376	hsa-circRNA4459-2	HSA_CIRCpedia_42023	exon	UGP2	3.05164	1.13018e-15
chr15:65959787|65962526	hsa-DENND4A_0031	hsa_circ_0035923	hsa_circ_03256	hsa-circRNA10790-19	HSA_CIRCpedia_15298	exon	DENND4A	3.05056	1.36771e-14
chr12:69107645|69108533	hsa-NUP107_0051	-	-	hsa-circRNA1872-21	-	intron	NUP107	3.04525	6.57341e-15
chr15:66021410|66025156	hsa-DENND4A_0003	hsa_circ_0035943	hsa_circ_32870	hsa-circRNA10790-61	HSA_CIRCpedia_15321	exon	DENND4A	3.04264	2.9058e-15
chr6:13632602|13644961	hsa-RANBP9_0001	hsa_circ_0001577	hsa_circ_16615	hsa-circRNA14601-4	HSA_CIRCpedia_53636	exon	RANBP9	3.04201	3.60208e-11
chr8:124089351|124096580	hsa-TBC1D31_0017	hsa_circ_0085438	hsa_circ_32350	hsa-circRNA7550-3	HSA_CIRCpedia_59944	exon	TBC1D31	3.04143	3.46056e-16
chr9:86294690|86301070	hsa-UBQLN1_0012	hsa_circ_0008207	hsa_circ_27489	hsa-circRNA15802-17	HSA_CIRCpedia_64536	exon	UBQLN1	3.04069	4.68456e-15
chr12:28408514|28460682	hsa-CCDC91_0046	-	-	hsa-circRNA1724-15	HSA_CIRCpedia_8162	exon		3.03045	2.6185e-18
chr1:172520652|172526934	hsa-SUCO_0003	hsa_circ_0000160	hsa_circ_24811	hsa-circRNA623-11	HSA_CIRCpedia_28748	exon	SUCO	3.02922	1.3592e-10
chr6:3410422|3416089	hsa-SLC22A23_0001	hsa_circ_0075504	hsa_circ_29747	hsa-circRNA14580-3	HSA_CIRCpedia_54791	exon	SLC22A23	3.02894	1.04478e-08
chr11:85692172|85742653	hsa-PICALM_0017	hsa_circ_0023903	hsa_circ_15977	hsa-circRNA9655-79	HSA_CIRCpedia_5876	exon	PICALM	3.02767	6.8759e-13
chr7:77407655|77408131	hsa-RSBN1L_0015	-	-	hsa-circRNA7134-14	-	exon	RSBN1L	3.02671	8.11772e-15
chr7:156619299|156629579	hsa-LMBR1_0004	hsa_circ_0005939	hsa_circ_14332	hsa-circRNA15385-18	HSA_CIRCpedia_57380	exon	LMBR1	3.02638	2.62861e-12
chr11:16133349|16208501	hsa-SOX6_0012	-	hsa_circ_31411	hsa-circRNA9424-18	HSA_CIRCpedia_3827	exon	SOX6	3.02576	1.12095e-11
chr2:136432902|136437894	hsa-R3HDM1_0001	hsa_circ_0001070	hsa_circ_12253	hsa-circRNA4643-34	HSA_CIRCpedia_37976	exon	R3HDM1	3.02296	3.2225e-15
chr5:36982267|36986403	hsa-NIPBL_0053	-	-	hsa-circRNA6244-13	-	intron	NIPBL	3.01195	1.29248e-12
chr22:32874968|32881196	hsa-FBXO7_0001	hsa_circ_0001222	hsa_circ_09912	hsa-circRNA5303-6	HSA_CIRCpedia_36498	exon	FBXO7	3.00342	3.50708e-19
chr21:37734481|37736557	hsa-MORC3_0036	-	hsa_circ_17362	hsa-circRNA5148-29	HSA_CIRCpedia_35394	exon	MORC3	2.99523	6.57868e-08
chr11:14793483|14810788	hsa-PDE3B_0007	hsa_circ_0000277	hsa_circ_05725	hsa-circRNA1244-13	HSA_CIRCpedia_3812	exon	PDE3B	2.99494	1.59342e-12
chr5:138994171|138994551	hsa-UBE2D2_0001	hsa_circ_0006716	hsa_circ_19910	hsa-circRNA6460-11	HSA_CIRCpedia_50483	exon	UBE2D2	2.99321	8.73056e-12
chr8:131302247|131370389	hsa-ASAP1_0081	-	-	-	-	intron	ASAP1	2.99153	1.2061e-20
chr15:66048478|66053776	hsa-DENND4A_0011	-	hsa_circ_10886	-	HSA_CIRCpedia_83475	exon	DENND4A	2.99044	1.29084e-10
chrX:77270159|77275895	hsa-ATP7A_0037	hsa_circ_0001934	hsa_circ_19201	hsa-circRNA8080-24	HSA_CIRCpedia_66328	exon	ATP7A	2.98834	2.95811e-07
chr11:118656761|118657227	hsa-DDX6_0015	hsa_circ_0004293	hsa_circ_24704	hsa-circRNA9727-19	HSA_CIRCpedia_3428	exon	DDX6	2.98771	2.58535e-12
chr13:95813443|95822882	hsa-ABCC4_0001	hsa_circ_0006659	hsa_circ_07003	hsa-circRNA10329-51	HSA_CIRCpedia_11220	exon	ABCC4	2.98733	5.54215e-14
chr5:109049221|109065214	hsa-MAN2A1_0001	hsa_circ_0001519	hsa_circ_24011	hsa-circRNA6380-39	HSA_CIRCpedia_49797	exon	MAN2A1	2.97228	1.4971e-10
chr4:140058784|140060651	hsa-ELF2_0004	hsa_circ_0007466	hsa_circ_00749	hsa-circRNA14136-20	HSA_CIRCpedia_47474	exon	ELF2	2.96483	3.78832e-12
chr17:45214518|45221348	hsa-CDC27_0019	hsa_circ_0044226	hsa_circ_27606	hsa-circRNA11531-28	HSA_CIRCpedia_21122	exon	CDC27	2.96324	1.22736e-12
chr20:54956489|54959380	hsa-AURKA_0004	hsa_circ_0004887	hsa_circ_22636	hsa-circRNA13111-8	HSA_CIRCpedia_34792	exon	AURKA	2.95958	8.34706e-10
chr7:16298015|16317851	hsa-ISPD_0004	hsa_circ_0079480	hsa_circ_10782	hsa-circRNA15043-4	HSA_CIRCpedia_57498	exon	CRPPA	2.95843	4.15036e-14
chr12:28378728|28412375	hsa-CCDC91_0011	hsa_circ_0000386	-	hsa-circRNA1724-11	HSA_CIRCpedia_8158	exon		2.95056	1.47585e-10
chr2:61709515|61717911	hsa-XPO1_0044	hsa_circ_0054853	hsa_circ_15553	hsa-circRNA12521-90	HSA_CIRCpedia_41900	exon	XPO1	2.94944	8.22608e-11
chr4:77065302|77065626	hsa-NUP54_0005	hsa_circ_0070040	hsa_circ_05467	hsa-circRNA14035-4	HSA_CIRCpedia_49138	exon	NUP54	2.94842	2.40987e-20
chr12:72051306|72054207	hsa-ZFC3H1_0057	hsa_circ_0006910	-	hsa-circRNA10028-24	-	intron	ZFC3H1	2.9478	6.38444e-12
chr18:74561482|74563895	hsa-ZNF236_0003	hsa_circ_0004979	hsa_circ_03512	hsa-circRNA3715-43	HSA_CIRCpedia_24312	exon	ZNF236	2.94015	3.32724e-08
chr9:33944363|33956144	hsa-UBAP2_0054	hsa_circ_0001846	hsa_circ_29648	hsa-circRNA15725-16	HSA_CIRCpedia_63917	exon	UBAP2	2.93988	8.20421e-21
chr8:124089351|124121860	hsa-TBC1D31_0004	hsa_circ_0085440	hsa_circ_22108	hsa-circRNA7550-23	HSA_CIRCpedia_59949	exon	TBC1D31	2.93756	5.90501e-15
chr7:50358644|50367353	hsa-IKZF1_0001	hsa_circ_0001708	hsa_circ_06676	hsa-circRNA7075-2	HSA_CIRCpedia_58217	exon	IKZF1	2.93755	2.37244e-10
chr8:120800578|120810086	hsa-TAF2_0039	-	hsa_circ_03496	hsa-circRNA15591-54	HSA_CIRCpedia_59913	exon	TAF2	2.93656	1.46037e-14
chr10:112723883|112745523	hsa-SHOC2_0002	hsa_circ_0020028	hsa_circ_07781	hsa-circRNA1108-9	HSA_CIRCpedia_392	exon	SHOC2	2.93262	1.3739e-10
chr16:71710350|71713438	hsa-PHLPP2_0010	hsa_circ_0040356	hsa_circ_14518	hsa-circRNA11169-24	HSA_CIRCpedia_18607	exon	PHLPP2	2.93188	3.07446e-16
chr4:140046318|140060651	hsa-ELF2_0008	hsa_circ_0001441	hsa_circ_18078	hsa-circRNA14136-16	HSA_CIRCpedia_47473	exon	ELF2	2.9215	8.94315e-10
chr16:9009111|9011013	hsa-USP7_0010	hsa_circ_0005152	hsa_circ_08643	hsa-circRNA10983-2	HSA_CIRCpedia_19229	exon	USP7	2.91994	1.23079e-08
chr8:131191510|131370389	hsa-ASAP1_0012	hsa_circ_0085606	-	hsa-circRNA15613-76	HSA_CIRCpedia_60090	exon	ASAP1	2.91741	7.51248e-17
chr2:208841375|208842310	hsa-PLEKHM3_0001	hsa_circ_0001095	hsa_circ_24309	hsa-circRNA12862-2	HSA_CIRCpedia_39444	exon	PLEKHM3	2.91335	2.87778e-16
chr2:240929491|240946787	hsa-NDUFA10_0012	hsa_circ_0001118	hsa_circ_06894	hsa-circRNA12936-6	HSA_CIRCpedia_40245	exon	NDUFA10	2.91241	3.16215e-21
chr2:9028148|9098771	hsa-MBOAT2_0002	hsa_circ_0008847	hsa_circ_24921	hsa-circRNA12402-12	HSA_CIRCpedia_42584	exon	MBOAT2	2.9106	9.66807e-13
chr1:113196220|113202401	hsa-CAPZA1_0004	hsa_circ_0000109	hsa_circ_12733	hsa-circRNA455-10	HSA_CIRCpedia_27340	exon	CAPZA1	2.90893	1.50707e-15
chr17:80521230|80526077	hsa-FOXK2_0001	hsa_circ_0000816	hsa_circ_04135	hsa-circRNA3578-20	HSA_CIRCpedia_22884	exon	FOXK2	2.90846	3.4441e-14
chr2:54278095|54284497	hsa-ACYP2_0002	hsa_circ_0004462	-	hsa-circRNA4441-1	HSA_CIRCpedia_41668	exon	ACYP2	2.90698	1.89509e-08
chr6:139264650|139265759	hsa-REPS1_0015	hsa_circ_0004368	hsa_circ_04620	hsa-circRNA14935-18	HSA_CIRCpedia_53725	exon	REPS1	2.90481	1.10334e-10
chr9:33953283|33956144	hsa-UBAP2_0035	hsa_circ_0003945	hsa_circ_20907	hsa-circRNA15725-28	HSA_CIRCpedia_63925	exon	UBAP2	2.90433	1.29502e-08
chr3:142144064|142145683	hsa-XRN1_0003	hsa_circ_0067620	hsa_circ_23477	hsa-circRNA13772-26	HSA_CIRCpedia_43897	exon	XRN1	2.90353	8.00271e-13
chr8:21832181|21835354	hsa-XPO7_0020	-	-	hsa-circRNA7370-3	HSA_CIRCpedia_60569	exon	XPO7	2.90334	4.693e-12
chr12:116668238|116675510	hsa-MED13L_0039	hsa_circ_0000442	-	hsa-circRNA10134-64	-	intron	MED13L	2.90266	9.2993e-10
chr4:83891480|83900159	hsa-LIN54_0003	hsa_circ_0003148	hsa_circ_26104	hsa-circRNA14049-15	HSA_CIRCpedia_49327	exon	LIN54	2.90188	6.57341e-15
chr15:66007816|66048810	hsa-DENND4A_0008	hsa_circ_0035938	-	hsa-circRNA10790-35	HSA_CIRCpedia_15317	exon	DENND4A	2.90181	1.70966e-19
chr5:167915607|167924353	hsa-RARS_0013	hsa_circ_0001551	hsa_circ_20160	hsa-circRNA6529-19	HSA_CIRCpedia_51050	exon	RARS1	2.89545	6.50345e-15
chr11:3752621|3774638	hsa-NUP98_0001	hsa_circ_0000274	hsa_circ_11055	hsa-circRNA9376-26	HSA_CIRCpedia_4316	exon	NUP98	2.89309	3.833e-15
chr2:8910800|8917022	hsa-KIDINS220_0008	hsa_circ_0005315	hsa_circ_27158	hsa-circRNA12401-12	HSA_CIRCpedia_42572	exon	KIDINS220	2.89005	3.15213e-15
chr17:57430576|57430887	hsa-YPEL2_0001	hsa_circ_0005600	hsa_circ_06075	hsa-circRNA3461-3	HSA_CIRCpedia_21634	exon	YPEL2	2.88489	3.78832e-12
chr8:124349865|124351686	hsa-ATAD2_0012	hsa_circ_0085465	hsa_circ_20714	hsa-circRNA15598-8	HSA_CIRCpedia_59975	exon	ATAD2	2.88313	1.50679e-08
chr3:197592294|197593090	hsa-LRCH3_0039	hsa_circ_0008439	hsa_circ_11888	hsa-circRNA5865-45	HSA_CIRCpedia_45147	exon	LRCH3	2.88174	1.30638e-19
chr8:95549331|95550574	hsa-KIAA1429_0032	hsa_circ_0006896	hsa_circ_30498	hsa-circRNA15550-24	HSA_CIRCpedia_61829	exon	VIRMA	2.8776	2.69722e-12
chr7:2269619|2270362	hsa-MAD1L1_0026	hsa_circ_0004961	hsa_circ_17386	hsa-circRNA15009-31	HSA_CIRCpedia_57621	exon	MAD1L1	2.87547	2.77237e-17
chr10:99196174|99197507	hsa-EXOSC1_0001	hsa_circ_0005887	hsa_circ_18122	hsa-circRNA9242-5	-	exon	EXOSC1	2.87353	2.28783e-12
chr3:152132730|152150709	hsa-MBNL1_0001	hsa_circ_0001349	hsa_circ_27932	hsa-circRNA5778-6	HSA_CIRCpedia_44074	exon	MBNL1	2.87203	6.55267e-15
chr15:65992882|65994228	hsa-DENND4A_0058	hsa_circ_0000619	hsa_circ_25700	hsa-circRNA10790-41	HSA_CIRCpedia_15308	exon	DENND4A	2.87072	1.545e-08
chr2:148730308|148739650	hsa-ORC4_0012	hsa_circ_0004491	hsa_circ_30155	hsa-circRNA12723-5	HSA_CIRCpedia_38064	exon	ORC4	2.87012	2.03936e-10
chr1:155644801|155649303	hsa-YY1AP1_0002	hsa_circ_0003608	hsa_circ_16014	hsa-circRNA8779-42	HSA_CIRCpedia_28204	exon	YY1AP1	2.87003	1.35151e-11
chr15:64066893|64067848	hsa-HERC1_0001	hsa_circ_0007112	hsa_circ_11684	hsa-circRNA10768-25	HSA_CIRCpedia_15126	exon	HERC1	2.86439	6.2433e-13
chr17:30498062|30503232	hsa-RHOT1_0002	hsa_circ_0008604	hsa_circ_32381	hsa-circRNA3312-4	HSA_CIRCpedia_20138	exon	RHOT1	2.86366	7.4951e-13
chr6:42643794|42647570	hsa-UBR2_0079	hsa_circ_0076405	hsa_circ_31724	hsa-circRNA6756-79	HSA_CIRCpedia_55016	exon	UBR2	2.85873	9.77532e-16
chr21:38792601|38845182	hsa-DYRK1A_0001	hsa_circ_0005955	hsa_circ_09254	hsa-circRNA5152-22	HSA_CIRCpedia_35470	exon	DYRK1A	2.85346	2.96947e-15
chr17:45232038|45235669	hsa-CDC27_0010	hsa_circ_0002502	hsa_circ_31309	hsa-circRNA11531-12	HSA_CIRCpedia_67241	exon	CDC27	2.84782	1.52266e-13
chr5:138699448|138700432	hsa-PAIP2_0001	hsa_circ_0001538	hsa_circ_06047	hsa-circRNA6459	HSA_CIRCpedia_50476	exon	PAIP2	2.84507	7.32372e-11
chr7:35707044|35712888	hsa-HERPUD2_0003	hsa_circ_0001696	hsa_circ_31198	hsa-circRNA15096-7	HSA_CIRCpedia_57969	exon	HERPUD2	2.84283	1.04869e-14
chr9:111812563|111826847	hsa-TMEM245_0012	hsa_circ_0003965	hsa_circ_27374	hsa-circRNA15871-14	HSA_CIRCpedia_62166	exon	TMEM245	2.84264	1.05701e-15
chr17:40879653|40882936	hsa-EZH1_0007	hsa_circ_0043898	hsa_circ_27755	hsa-circRNA11486-16	HSA_CIRCpedia_20832	exon	EZH1	2.83701	1.40671e-17
chr8:100286426|100287482	hsa-VPS13B_0002	hsa_circ_0004366	hsa_circ_11777	hsa-circRNA7522-92	HSA_CIRCpedia_59581	exon	VPS13B	2.83488	7.00031e-13
chr5:131013396|131044965	hsa-FNIP1_0031	hsa_circ_0001524	hsa_circ_11228	hsa-circRNA14404-41	HSA_CIRCpedia_50121	exon	FNIP1	2.83359	3.08892e-19
chr5:138614016|138614818	hsa-SNHG4_0001	hsa_circ_0008922	hsa_circ_31591	hsa-circRNA6457-29	HSA_CIRCpedia_50464	exon	MATR3	2.83071	2.03818e-13
chr16:71712658|71715808	hsa-PHLPP2_0024	hsa_circ_0000715	hsa_circ_22517	hsa-circRNA11169-15	HSA_CIRCpedia_18612	exon	PHLPP2	2.83035	7.06634e-11
chr4:113483527|113506881	hsa-ZGRF1_0010	hsa_circ_0070680	hsa_circ_30538	hsa-circRNA14109-17	HSA_CIRCpedia_47175	exon	ZGRF1	2.82961	4.4145e-15
chr3:195800801|195802231	hsa-TFRC_0013	hsa_circ_0068629	hsa_circ_17170	hsa-circRNA13887-12	HSA_CIRCpedia_45015	exon	TFRC	2.82824	2.65371e-12
chr1:21071237|21107033	hsa-HP1BP3_0017	-	-	-	HSA_CIRCpedia_181497	exon	HP1BP3	2.82287	4.06992e-20
chr10:51579128|51581378	-	hsa_circ_0007016	hsa_circ_05640	hsa-circRNA926-17	HSA_CIRCpedia_1783	exon		2.82007	9.02134e-11
chr10:49609655|49618211	hsa-MAPK8_0001	hsa_circ_0002968	hsa_circ_06767	hsa-circRNA924-8	HSA_CIRCpedia_1733	exon	MAPK8	2.81974	1.76628e-14
chr13:42511451|42513722	hsa-VWA8_0110	-	-	-	-	intron	VWA8	2.81499	4.89021e-09
chr18:55238624|55247431	hsa-FECH_0013	-	-	hsa-circRNA11818-5	HSA_CIRCpedia_24049	exon	FECH	2.80835	5.78098e-15
chr2:239090706|239093928	hsa-ILKAP_0001	hsa_circ_0001116	hsa_circ_04102	hsa-circRNA12932-26	HSA_CIRCpedia_40179	exon	ILKAP	2.80653	3.59084e-14
chr13:41826781|41835051	hsa-MTRF1_0007	hsa_circ_0008230	hsa_circ_04936	hsa-circRNA10271-8	HSA_CIRCpedia_10698	exon	MTRF1	2.80135	6.14506e-12
chr12:72051329|72054207	hsa-ZFC3H1_0059	-	-	-	-	intron	ZFC3H1	2.80099	3.36244e-09
chr1:15964802|15978390	hsa-DDI2_0004	hsa_circ_0000020	hsa_circ_02958	hsa-circRNA80-24	HSA_CIRCpedia_28391	exon	DDI2	2.79356	1.5948e-08
chr4:54280782|54294350	hsa-FIP1L1_0003	hsa_circ_0007476	hsa_circ_18069	hsa-circRNA5991-29	HSA_CIRCpedia_48829	exon	FIP1L1	2.79165	5.62016e-11
chr2:9083316|9127890	hsa-MBOAT2_0018	-	-	-	-	intron	MBOAT2	2.78409	5.50752e-14
chr4:48371866|48385801	hsa-SLAIN2_0001	-	hsa_circ_10409	hsa-circRNA5984-7	HSA_CIRCpedia_48752	exon	SLAIN2	2.78222	1.06208e-13
chr1:40654727|40668286	hsa-RLF_0002	hsa_circ_0006373	hsa_circ_12622	hsa-circRNA224-8	HSA_CIRCpedia_31811	exon	RLF	2.77889	1.18265e-14
chr3:197541779|197547301	hsa-LRCH3_0005	hsa_circ_0002266	hsa_circ_24242	hsa-circRNA5865-57	HSA_CIRCpedia_45119	exon	LRCH3	2.77749	3.10015e-12
chr12:28408514|28412375	hsa-CCDC91_0048	hsa_circ_0000387	-	hsa-circRNA1724-17	HSA_CIRCpedia_8161	exon		2.7714	2.042e-12
chr7:6085702|6089676	hsa-EIF2AK1_0006	hsa_circ_0001673	hsa_circ_28867	hsa-circRNA15025-7	HSA_CIRCpedia_58395	exon	EIF2AK1	2.77131	2.49049e-12
chr4:73956384|73958017	hsa-ANKRD17_0008	hsa_circ_0007883	hsa_circ_01636	hsa-circRNA14030-26	HSA_CIRCpedia_49060	exon	ANKRD17	2.77043	1.6562e-11
chr11:68318589|68331900	hsa-PPP6R3_0009	hsa_circ_0007660	hsa_circ_14147	hsa-circRNA1458-17	HSA_CIRCpedia_66846	exon	PPP6R3	2.77015	1.72912e-09
chr17:60106902|60112969	hsa-MED13_0015	hsa_circ_0045096	hsa_circ_12219	hsa-circRNA11597-46	HSA_CIRCpedia_21885	exon	MED13	2.76775	1.28746e-20
chr9:126519982|126531842	hsa-DENND1A_0001	hsa_circ_0088474	hsa_circ_30563	hsa-circRNA15918-64	HSA_CIRCpedia_62707	exon	DENND1A	2.76642	2.17392e-09
chr12:69983265|69987393	hsa-CCT2_0003	hsa_circ_0002940	hsa_circ_24568	hsa-circRNA1880-3	HSA_CIRCpedia_9493	exon	CCT2	2.76634	2.50301e-10
chr11:85692788|85701442	hsa-PICALM_0060	-	-	hsa-circRNA9655-96	HSA_CIRCpedia_5880	exon	PICALM	2.76381	3.64113e-13
chr1:168007609|168014465	hsa-DCAF6_0005	hsa_circ_0000155	hsa_circ_32611	hsa-circRNA611-20	HSA_CIRCpedia_28605	exon	DCAF6	2.76025	6.19409e-10
chr3:195785155|195792471	hsa-TFRC_0018	hsa_circ_0068611	hsa_circ_18218	hsa-circRNA13887-25	HSA_CIRCpedia_45001	exon	TFRC	2.75979	4.71215e-18
chr4:99495608|99496056	hsa-TSPAN5_0008	-	-	hsa-circRNA14074-4	HSA_CIRCpedia_49670	exon	TSPAN5	2.75758	4.80401e-11
chr2:122363277|122363756	hsa-CLASP1_0003	hsa_circ_0007052	hsa_circ_27618	hsa-circRNA12688-48	HSA_CIRCpedia_37744	exon	CLASP1	2.75415	2.05537e-19
chr19:3660964|3661999	hsa-PIP5K1C_0009	hsa_circ_0000871	hsa_circ_08325	hsa-circRNA11903-27	HSA_CIRCpedia_25726	exon	PIP5K1C	2.75361	8.96962e-14
chr10:46028558|46048652	hsa-MARCH8_0004	-	-	-	-	exon	MARCHF8	2.75202	1.68102e-11
chr12:51402259|51404549	hsa-SLC11A2_0002	hsa_circ_0008802	hsa_circ_02656	hsa-circRNA9934-3	HSA_CIRCpedia_8774	exon	SLC11A2	2.74567	8.30658e-13
chr1:229675203|229685181	hsa-ABCB10_0001	-	hsa_circ_09893	hsa-circRNA8981-13	HSA_CIRCpedia_30450	exon	ABCB10	2.743	7.18075e-14
chr10:126370176|126370948	hsa-FAM53B_0001	hsa_circ_0000267	hsa_circ_29814	hsa-circRNA9326-3	HSA_CIRCpedia_826	exon	FAM53B	2.73917	4.54823e-12
chr5:65349234|65350779	hsa-ERBIN_0004	hsa_circ_0072732	hsa_circ_15483	hsa-circRNA6289-4	HSA_CIRCpedia_52237	exon	ERBIN	2.73751	8.80091e-09
chr14:68151732|68157138	hsa-RDH11_0004	hsa_circ_0006278	hsa_circ_03874	hsa-circRNA10497-5	HSA_CIRCpedia_12749	exon	RDH11	2.73702	1.67658e-15
chr2:203329532|203332412	hsa-BMPR2_0001	hsa_circ_0003218	hsa_circ_06837	hsa-circRNA4760-27	HSA_CIRCpedia_39204	exon	BMPR2	2.73698	1.21089e-11
chr12:28458582|28460682	hsa-CCDC91_0001	hsa_circ_0007723	hsa_circ_00886	hsa-circRNA1724-13	HSA_CIRCpedia_8169	exon		2.72528	7.56498e-12
chr20:54961313|54963258	hsa-AURKA_0005	hsa_circ_0060950	-	hsa-circRNA13111-5	HSA_CIRCpedia_34796	exon	AURKA	2.72276	4.88195e-19
chr4:106155054|106158508	hsa-TET2_0005	hsa_circ_0070562	hsa_circ_19946	hsa-circRNA6076-6	HSA_CIRCpedia_47035	exon	TET2	2.72266	1.49991e-15
chr1:7837220|7838229	hsa-VAMP3_0001	hsa_circ_0006354	hsa_circ_18051	hsa-circRNA36-3	HSA_CIRCpedia_32961	exon	VAMP3	2.71597	2.97609e-14
chr19:18650181|18650530	hsa-FKBP8_0005	hsa_circ_0000915	hsa_circ_24455	hsa-circRNA12100-11	HSA_CIRCpedia_25189	exon	FKBP8	2.71415	2.13374e-14
chr16:53175091|53191453	hsa-CHD9_0107	-	-	hsa-circRNA3000-13	-	intron	CHD9	2.71292	3.84101e-14
chr7:128655033|128658211	hsa-TNPO3_0002	hsa_circ_0001741	hsa_circ_18615	hsa-circRNA15310-60	HSA_CIRCpedia_56602	exon	TNPO3	2.71195	2.54246e-10
chr2:227771509|227779067	hsa-RHBDD1_0001	hsa_circ_0058497	hsa_circ_29883	hsa-circRNA4829-3	HSA_CIRCpedia_39880	exon	RHBDD1	2.71125	5.38082e-12
chr5:112321532|112339774	hsa-DCP2_0008	hsa_circ_0001520	hsa_circ_08679	hsa-circRNA6388-5	HSA_CIRCpedia_49851	exon	DCP2	2.71026	2.62169e-12
chr12:58340778|58347472	hsa-ATP23_0003	hsa_circ_0000412	hsa_circ_06865	hsa-circRNA1845-3	HSA_CIRCpedia_9206	exon	ATP23	2.7022	7.24171e-12
chr4:110412483|110416012	hsa-SEC24B_0010	hsa_circ_0001436	hsa_circ_08663	hsa-circRNA6086-18	HSA_CIRCpedia_47127	exon	SEC24B	2.70153	9.03059e-18
chr13:95813443|95818621	hsa-ABCC4_0029	hsa_circ_0007470	hsa_circ_24899	hsa-circRNA10329-57	HSA_CIRCpedia_11219	exon	ABCC4	2.70133	5.9055e-11
chr2:242079936|242080168	hsa-PASK_0004	hsa_circ_0006391	hsa_circ_32488	hsa-circRNA12944-11	HSA_CIRCpedia_40305	exon	PASK	2.6989	3.906e-10
chr15:60734615|60737990	hsa-ICE2_0032	hsa_circ_0000606	-	hsa-circRNA10757-14	-	intron	ICE2	2.69631	1.45535e-08
chr22:30374431|30387659	hsa-MTMR3_0003	hsa_circ_0002954	hsa_circ_19866	hsa-circRNA5285-17	HSA_CIRCpedia_36345	exon	MTMR3	2.69313	2.48261e-10
chr1:224553581|224559125	hsa-CNIH4_0001	hsa_circ_0000190	hsa_circ_21785	hsa-circRNA768-3	HSA_CIRCpedia_30227	exon	CNIH4	2.68489	2.66452e-10
chr18:45391430|45423180	hsa-SMAD2_0004	hsa_circ_0000847	hsa_circ_07088	hsa-circRNA11803-9	HSA_CIRCpedia_23897	exon	SMAD2	2.68245	5.24773e-12
chr17:60111148|60112969	hsa-MED13_0003	hsa_circ_0004273	hsa_circ_30337	hsa-circRNA11597-22	HSA_CIRCpedia_21887	exon	MED13	2.68174	8.60026e-09
chr22:45574119|45574781	hsa-NUP50_0001	hsa_circ_0002077	hsa_circ_02434	hsa-circRNA5370	HSA_CIRCpedia_36999	exon	NUP50	2.68134	1.98766e-11
chr8:37971710|37978667	hsa-ASH2L_0001	hsa_circ_0006302	hsa_circ_18613	hsa-circRNA7420-16	HSA_CIRCpedia_60945	exon	ASH2L	2.6805	2.72772e-12
chr18:55233679|55247431	hsa-FECH_0002	-	-	hsa-circRNA11818-3	HSA_CIRCpedia_24047	exon	FECH	2.67983	1.73107e-12
chr10:22880558|22898646	hsa-PIP4K2A_0002	hsa_circ_0003583	hsa_circ_12752	hsa-circRNA9078-12	HSA_CIRCpedia_1245	exon	PIP4K2A	2.67286	6.105e-08
chr12:46622936|46637097	hsa-SLC38A1_0009	hsa_circ_0000396	hsa_circ_03036	hsa-circRNA9900-13	HSA_CIRCpedia_8494	exon	SLC38A1	2.672	7.00332e-14
chr16:14645878|14723531	hsa-PARN_0079	-	-	hsa-circRNA11004-6	HSA_CIRCpedia_173726	exon	PARN	2.67179	6.08652e-10
chr12:96717726|96728643	hsa-CDK17_0013	hsa_circ_0002762	hsa_circ_15086	hsa-circRNA10073-17	HSA_CIRCpedia_9893	exon		2.66892	2.01603e-16
chr12:112707508|112711599	hsa-HECTD4_0058	hsa_circ_0028410	hsa_circ_13613	hsa-circRNA10125-17	HSA_CIRCpedia_6852	exon	HECTD4	2.66782	7.4951e-13
chr2:162036125|162061304	hsa-TANK_0001	hsa_circ_0005227	hsa_circ_27608	hsa-circRNA4667-2	HSA_CIRCpedia_38380	exon	TANK	2.6661	1.09212e-11
chr15:66015186|66025156	hsa-DENND4A_0009	-	-	hsa-circRNA10790-18	HSA_CIRCpedia_15318	exon	DENND4A	2.66519	6.64846e-13
chr4:160159961|160164943	hsa-RAPGEF2_0001	-	-	hsa-circRNA6159-24	-	exon	RAPGEF2	2.66431	1.66261e-10
chr3:49372453|49373029	hsa-USP4_0030	hsa_circ_0001301	-	hsa-circRNA13545-21	-	intron	USP4	2.65941	4.26864e-11
chr15:40920268|40943017	hsa-CASC5_0010	-	-	-	-	intron	KNL1	2.6589	1.25034e-11
chr8:95897295|95897786	hsa-CCNE2_0002	hsa_circ_0008608	hsa_circ_12023	hsa-circRNA15551-2	HSA_CIRCpedia_61886	exon	CCNE2	2.65544	2.69153e-10
chr14:102659800|102661457	hsa-WDR20_0002	hsa_circ_0000569	hsa_circ_31954	hsa-circRNA2438-3	HSA_CIRCpedia_11449	exon	WDR20	2.65327	9.87238e-11
chr9:37424842|37426651	hsa-GRHPR_0002	hsa_circ_0001861	hsa_circ_03935	hsa-circRNA7665-8	HSA_CIRCpedia_64127	exon	GRHPR	2.65267	3.95093e-11
chr4:48686690|48712715	hsa-FRYL_0091	hsa_circ_0002021	hsa_circ_10038	hsa-circRNA13998-36	HSA_CIRCpedia_48774	exon	FRYL	2.65245	9.77532e-16
chr20:43107264|43118752	hsa-TTPAL_0013	-	-	-	-	exon	TTPAL	2.65193	1.717e-19
chr17:20149239|20163607	hsa-SPECC1_0005	hsa_circ_0003545	hsa_circ_21514	hsa-circRNA3281-13	HSA_CIRCpedia_19702	exon	SPECC1	2.65135	1.04558e-16
chr1:44474025|44474295	hsa-SLC6A9_0002	hsa_circ_0012134	hsa_circ_05085	hsa-circRNA8476-1	HSA_CIRCpedia_32009	exon	SLC6A9	2.65	1.0834e-09
chr11:34111726|34113603	hsa-CAPRIN1_0018	hsa_circ_0004851	hsa_circ_23876	hsa-circRNA1283-48	HSA_CIRCpedia_4174	exon	CAPRIN1	2.64638	4.72794e-12
chr7:148543562|148544397	hsa-EZH2_0001	hsa_circ_0006357	hsa_circ_22432	hsa-circRNA15355-18	HSA_CIRCpedia_57174	exon	EZH2	2.6451	1.40089e-09
chr9:4823531|4827033	hsa-RCL1_0012	-	-	-	-	intron	RCL1	2.64399	1.20525e-09
chrX:67731691|67742759	hsa-YIPF6_0001	hsa_circ_0004379	hsa_circ_32388	hsa-circRNA8048-1	HSA_CIRCpedia_66175	exon	YIPF6	2.64365	2.71395e-08
chr11:3789811|3797251	hsa-NUP98_0008	hsa_circ_0007401	hsa_circ_22637	hsa-circRNA9376-126	HSA_CIRCpedia_4332	exon	NUP98	2.64351	4.15603e-12
chr16:56419831|56423287	hsa-AMFR_0016	hsa_circ_0000704	hsa_circ_09502	hsa-circRNA11103-19	HSA_CIRCpedia_17923	exon	AMFR	2.64236	5.68752e-17
chr17:58342773|58348842	hsa-USP32_0025	hsa_circ_0000793	hsa_circ_17134	hsa-circRNA11592-11	HSA_CIRCpedia_21722	exon	USP32	2.63976	1.43982e-14
chr4:73950966|73958017	hsa-ANKRD17_0003	hsa_circ_0001417	hsa_circ_13463	hsa-circRNA14030-45	HSA_CIRCpedia_49056	exon	ANKRD17	2.63907	6.16562e-10
chr6:56963859|56967677	hsa-ZNF451_0032	-	-	-	-	exon	ZNF451	2.63611	2.74959e-13
chr8:131172110|131370389	hsa-ASAP1_0023	-	-	hsa-circRNA15613-63	HSA_CIRCpedia_126090	exon	ASAP1	2.63593	6.14209e-08
chr13:50601499|50619368	hsa-DLEU2_0004	-	-	hsa-circRNA10297-7	-	intron	DLEU2	2.63423	9.35053e-13
chr6:52935855|52941341	hsa-FBXO9_0002	hsa_circ_0003700	hsa_circ_15084	hsa-circRNA6785-12	HSA_CIRCpedia_55268	exon	FBXO9	2.63337	3.92222e-09
chr4:103635595|103647840	hsa-MANBA_0001	hsa_circ_0001432	hsa_circ_30205	hsa-circRNA14085-4	HSA_CIRCpedia_47002	exon	MANBA	2.62953	9.43697e-14
chr13:95858786|95863035	hsa-ABCC4_0008	hsa_circ_0006318	hsa_circ_09810	hsa-circRNA10329-28	HSA_CIRCpedia_11239	exon	ABCC4	2.62661	1.57335e-14
chr2:215632206|215646233	hsa-BARD1_0006	hsa_circ_0001098	hsa_circ_30509	hsa-circRNA12871-16	HSA_CIRCpedia_39563	exon	BARD1	2.61732	8.89351e-14
chr16:72122886|72124685	hsa-TXNL4B_0001	hsa_circ_0040414	hsa_circ_15411	hsa-circRNA11171-2	HSA_CIRCpedia_18646	exon	TXNL4B	2.61391	2.2299e-12
chr1:25666965|25683344	hsa-TMEM50A_0002	-	-	hsa-circRNA129-10	HSA_CIRCpedia_31073	exon	TMEM50A	2.61388	1.97163e-13
chr6:56989532|56999668	hsa-ZNF451_0011	hsa_circ_0076881	-	hsa-circRNA6792-6	HSA_CIRCpedia_55336	exon	ZNF451	2.61384	1.36193e-11
chr12:1812052|1863680	hsa-ADIPOR2_0011	-	-	-	-	exon	ADIPOR2	2.61228	4.4279e-12
chr10:74474869|74475660	hsa-MCU_0001	hsa_circ_0000247	hsa_circ_19646	hsa-circRNA978-6	HSA_CIRCpedia_2308	exon	MCU	2.60836	3.54545e-20
chr11:16117542|16208501	hsa-SOX6_0014	-	hsa_circ_15836	-	HSA_CIRCpedia_73556	exon	SOX6	2.60802	1.55817e-17
chr10:13214376|13214765	hsa-MCM10_0002	hsa_circ_0002109	hsa_circ_21571	hsa-circRNA858-13	HSA_CIRCpedia_986	exon	MCM10	2.59484	1.87566e-09
chr6:134301220|134305809	hsa-TBPL1_0001	hsa_circ_0077892	hsa_circ_12323	hsa-circRNA6904-5	HSA_CIRCpedia_53591	exon	TBPL1	2.59422	3.13895e-14
chr21:40578034|40584633	hsa-BRWD1_0043	-	hsa_circ_08071	hsa-circRNA13191-50	HSA_CIRCpedia_35507	exon	BRWD1	2.59398	8.78347e-11
chr8:48866180|48869991	hsa-PRKDC_0001	hsa_circ_0084464	-	hsa-circRNA15486-139	HSA_CIRCpedia_61311	exon	PRKDC	2.59366	2.21284e-14
chr12:112667502|112670889	hsa-HECTD4_0019	-	hsa_circ_10111	hsa-circRNA10125-21	HSA_CIRCpedia_6835	exon	HECTD4	2.58945	1.25034e-11
chr14:31185130|31204064	hsa-SCFD1_0008	hsa_circ_0000528	hsa_circ_11615	hsa-circRNA2247-17	HSA_CIRCpedia_11845	exon	SCFD1	2.58751	1.22077e-11
chr3:119219542|119222868	hsa-TIMMDC1_0001	hsa_circ_0001329	hsa_circ_19408	hsa-circRNA5681-1	HSA_CIRCpedia_43068	exon	TIMMDC1	2.58707	3.88046e-12
chr2:24787164|24816590	hsa-NCOA1_0052	-	-	hsa-circRNA4353-10	-	intron	NCOA1	2.58692	5.24773e-12
chr15:99250791|99251336	hsa-IGF1R_0001	hsa_circ_0005035	hsa_circ_32512	hsa-circRNA2744-21	HSA_CIRCpedia_16237	exon	IGF1R	2.58668	1.98857e-13
chr4:78694235|78697546	hsa-CNOT6L_0002	hsa_circ_0006168	hsa_circ_23943	hsa-circRNA14038-11	HSA_CIRCpedia_49193	exon	CNOT6L	2.58358	2.37158e-12
chr14:103865288|103871604	hsa-MARK3_0065	hsa_circ_0008282	-	hsa-circRNA2452-19	-	intron	MARK3	2.58268	7.41668e-11
chr15:43242460|43258484	hsa-UBR1_0059	hsa_circ_0008546	hsa_circ_18984	hsa-circRNA10689-69	HSA_CIRCpedia_14379	exon	UBR1	2.58014	7.09215e-12
chr4:128842679|128861152	hsa-MFSD8_0017	hsa_circ_0009133	hsa_circ_30424	hsa-circRNA14130-1	HSA_CIRCpedia_47378	exon	MFSD8	2.57488	1.79665e-18
chr20:32659872|32666359	hsa-RALY_0001	hsa_circ_0001140	hsa_circ_27034	hsa-circRNA4984-17	HSA_CIRCpedia_33777	exon	RALY	2.57439	2.31371e-11
chr15:66015186|66031213	hsa-DENND4A_0093	hsa_circ_0035939	-	hsa-circRNA10790-4	HSA_CIRCpedia_130844	exon	DENND4A	2.56957	1.77757e-11
chr1:172525009|172526934	hsa-SUCO_0022	hsa_circ_0015262	-	hsa-circRNA623-13	HSA_CIRCpedia_28753	exon	SUCO	2.56721	4.32361e-13
chr9:86293356|86297981	hsa-UBQLN1_0014	hsa_circ_0001866	hsa_circ_21258	hsa-circRNA15802-11	HSA_CIRCpedia_64533	exon	UBQLN1	2.56682	1.70506e-11
chr11:85692788|85707972	hsa-PICALM_0057	hsa_circ_0002264	hsa_circ_22116	hsa-circRNA9655-13	HSA_CIRCpedia_5881	exon	PICALM	2.56636	3.63554e-09
chr1:145594039|145595220	-	hsa_circ_0003693	hsa_circ_07711	hsa-circRNA8688-16	HSA_CIRCpedia_27720	exon	POLR3C	2.56368	1.57991e-13
chr10:82228303|82249070	hsa-TSPAN14_0004	hsa_circ_0009033	-	hsa-circRNA1008-6	HSA_CIRCpedia_2560	exon	TSPAN14	2.56227	1.0363e-19
chr16:11940358|11941663	hsa-RSL1D1_0002	hsa_circ_0006979	hsa_circ_18691	hsa-circRNA11000-4	HSA_CIRCpedia_16349	exon	RSL1D1	2.56123	1.16396e-12
chr21:38792601|38794168	hsa-DYRK1A_0011	hsa_circ_0001190	hsa_circ_28536	hsa-circRNA5152-4	HSA_CIRCpedia_181631	intron	DYRK1A	2.56101	6.54548e-11
chr7:32672155|32678977	hsa-DPY19L1P1_0004	hsa_circ_0006010	hsa_circ_20548	hsa-circRNA15085-18	HSA_CIRCpedia_57880	exon	DPY19L1P1	2.56096	3.56875e-11
chr8:21847861|21851962	hsa-XPO7_0001	-	-	-	-	exon	XPO7	2.55824	1.8883e-10
chr11:16117542|16133469	hsa-SOX6_0020	-	hsa_circ_06088	hsa-circRNA9424-13	HSA_CIRCpedia_119464	exon	SOX6	2.55773	5.54175e-14
chr9:88233898|88248289	hsa-AGTPBP1_0009	hsa_circ_0001868	hsa_circ_14822	hsa-circRNA15808-12	HSA_CIRCpedia_64566	exon	AGTPBP1	2.55296	9.73647e-14
chr10:89267886|89280926	hsa-MINPP1_0005	-	-	-	-	exon	MINPP1	2.55098	1.92097e-10
chr7:158580695|158591763	hsa-ESYT2_0001	hsa_circ_0001777	hsa_circ_29738	hsa-circRNA15390-50	HSA_CIRCpedia_57474	exon	ESYT2	2.54784	1.64023e-09
chr4:139993020|139994721	hsa-ELF2_0001	hsa_circ_0002594	hsa_circ_28799	hsa-circRNA14136-8	HSA_CIRCpedia_47468	exon	ELF2	2.54569	5.29088e-10
chr19:23541232|23545527	hsa-ZNF91_0001	-	-	hsa-circRNA12128	-	exon	ZNF91	2.5454	4.27612e-14
chr1:225600156|225603034	hsa-LBR_0002	hsa_circ_0016650	hsa_circ_09713	hsa-circRNA8962-12	HSA_CIRCpedia_30298	exon	LBR	2.54492	1.15106e-08
chr13:42385361|42393522	hsa-VWA8_0013	hsa_circ_0004711	hsa_circ_00089	hsa-circRNA10272-64	HSA_CIRCpedia_10744	exon	VWA8	2.54457	2.77699e-11
chr15:63982740|63987093	hsa-HERC1_0171	-	hsa_circ_28599	hsa-circRNA10768-143	HSA_CIRCpedia_15095	exon	HERC1	2.54438	8.95981e-19
chr2:231307652|231314970	hsa-SP100_0001	hsa_circ_0003922	hsa_circ_14741	hsa-circRNA4835-13	HSA_CIRCpedia_39971	exon	SP100	2.54245	6.37411e-12
chr8:124346118|124348772	hsa-ATAD2_0013	hsa_circ_0085458	hsa_circ_08817	hsa-circRNA15598-2	HSA_CIRCpedia_59972	exon	ATAD2	2.53949	5.31868e-10
chr17:30310018|30315516	hsa-SUZ12_0003	hsa_circ_0002629	hsa_circ_06508	hsa-circRNA3310-171	HSA_CIRCpedia_20127	exon	SUZ12	2.53907	4.13648e-12
chr1:41536267|41541123	hsa-SCMH1_0001	hsa_circ_0000061	hsa_circ_12377	hsa-circRNA8462-8	HSA_CIRCpedia_31875	exon	SCMH1	2.53865	7.02099e-09
chr17:58012554|58018304	hsa-RPS6KB1_0008	-	hsa_circ_15624	hsa-circRNA3465-6	HSA_CIRCpedia_21697	exon	RPS6KB1	2.53862	1.9778e-21
chr1:44467985|44468657	hsa-SLC6A9_0001	hsa_circ_0012133	-	hsa-circRNA8475-4	HSA_CIRCpedia_32008	exon	SLC6A9	2.53735	7.08368e-20
chr11:120343759|120348235	hsa-ARHGEF12_0042	hsa_circ_0009021	hsa_circ_12870	hsa-circRNA1579-2	HSA_CIRCpedia_3508	exon	ARHGEF12	2.53596	1.24264e-09
chrX:147743429|147744289	hsa-AFF2_0002	hsa_circ_0001947	hsa_circ_16052	hsa-circRNA8165-1	HSA_CIRCpedia_65321	exon	AFF2	2.53463	6.88654e-11
chr3:63898264|63898901	hsa-ATXN7_0001	hsa_circ_0007761	hsa_circ_07246	hsa-circRNA5614-13	HSA_CIRCpedia_46643	exon		2.52971	2.20408e-10
chr2:176835492|176860374	hsa-KIAA1715_0005	hsa_circ_0005775	hsa_circ_22715	hsa-circRNA12786-9	HSA_CIRCpedia_38711	exon	LNPK	2.52344	1.62657e-10
chr10:45953233|45959775	hsa-MARCH8_0002	-	-	-	-	exon	MARCHF8	2.52287	2.83417e-13
chr6:42627394|42633983	hsa-UBR2_0083	-	-	hsa-circRNA6756-45	HSA_CIRCpedia_55006	exon	UBR2	2.52135	3.11191e-11
chr3:17051166|17056403	hsa-PLCL2_0002	hsa_circ_0001274	hsa_circ_11338	hsa-circRNA5458-3	HSA_CIRCpedia_44378	exon	PLCL2	2.52048	4.61368e-11
chr4:52729603|52758017	hsa-DCUN1D4_0002	hsa_circ_0007646	hsa_circ_03523	hsa-circRNA5987-4	HSA_CIRCpedia_48800	exon	DCUN1D4	2.5199	6.25095e-12
chr1:155695173|155695810	hsa-DAP3_0001	hsa_circ_0014614	hsa_circ_10842	hsa-circRNA550-8	HSA_CIRCpedia_28218	exon	DAP3	2.51974	6.64763e-11
chr10:5827105|5842668	hsa-GDI2_0004	hsa_circ_0005379	hsa_circ_23352	hsa-circRNA9039-5	HSA_CIRCpedia_1858	exon	GDI2	2.51767	4.10559e-10
chr6:155095123|155116273	hsa-SCAF8_0001	hsa_circ_0001654	hsa_circ_06913	hsa-circRNA6940-32	HSA_CIRCpedia_54043	exon	SCAF8	2.51324	7.40116e-15
chr7:80285856|80295805	hsa-CD36_0001	-	-	-	HSA_CIRCpedia_150389	exon	CD36	2.51164	5.60221e-12
chr11:61133517|61133688	hsa-TMEM138_0005	hsa_circ_0005130	hsa_circ_17165	hsa-circRNA1346-1	HSA_CIRCpedia_4825	exon	TMEM138	2.51142	3.44631e-09
chr6:13579683|13584457	hsa-SIRT5_0007	hsa_circ_0007218	hsa_circ_17421	hsa-circRNA6615-2	HSA_CIRCpedia_53625	exon	SIRT5	2.51066	8.88593e-12
chr2:170394523|170401345	hsa-FASTKD1_0016	-	hsa_circ_26236	hsa-circRNA12767-15	HSA_CIRCpedia_38470	exon	FASTKD1	2.50865	1.51793e-15
chr9:86292642|86301070	hsa-UBQLN1_0017	hsa_circ_0003715	hsa_circ_22143	hsa-circRNA15802-32	HSA_CIRCpedia_64531	exon	UBQLN1	2.50779	2.02135e-14
chr17:29061915|29086557	hsa-SUZ12P1_0001	-	hsa_circ_17800	hsa-circRNA3310-116	HSA_CIRCpedia_20024	exon	SUZ12P1	2.5071	1.46367e-13
chr2:227729320|227773594	hsa-RHBDD1_0005	hsa_circ_0058494	hsa_circ_25919	hsa-circRNA4829-2	HSA_CIRCpedia_39878	exon	RHBDD1	2.50609	1.16917e-08
chr13:27664020|27690733	hsa-USP12_0001	-	-	-	HSA_CIRCpedia_10456	exon	USP12	2.50539	4.91929e-08
chr10:16794538|16824083	hsa-RSU1_0003	hsa_circ_0006577	hsa_circ_16072	hsa-circRNA9065-2	HSA_CIRCpedia_1131	exon	RSU1	2.50373	1.10931e-10
chr3:123649949|123667979	hsa-CCDC14_0006	-	hsa_circ_31260	hsa-circRNA13715-11	HSA_CIRCpedia_43258	exon	CCDC14	2.50367	3.12073e-18
chr15:63998979|64008672	hsa-HERC1_0013	hsa_circ_0035801	hsa_circ_15476	hsa-circRNA10768-40	HSA_CIRCpedia_15101	exon	HERC1	2.50289	1.87943e-11
chr2:174819601|174820960	hsa-SP3_0001	hsa_circ_0002642	hsa_circ_00233	hsa-circRNA12775-2	HSA_CIRCpedia_38671	exon	SP3	2.49973	8.06395e-09
chr5:52899282|52900725	hsa-NDUFS4_0010	hsa_circ_0005593	-	hsa-circRNA6268-8	HSA_CIRCpedia_51921	exon	NDUFS4	2.49678	2.46901e-09
chr15:65994643|65995346	hsa-DENND4A_0057	hsa_circ_0007072	hsa_circ_07345	hsa-circRNA10790-26	HSA_CIRCpedia_15311	exon	DENND4A	2.49193	1.25034e-11
chr16:18852887|18856973	hsa-SMG1_0001	hsa_circ_0006434	hsa_circ_31847	hsa-circRNA11025-14	HSA_CIRCpedia_16761	exon	SMG1	2.49119	7.07407e-16
chr14:50131344|50141145	hsa-POLE2_0002	hsa_circ_0031787	hsa_circ_04935	hsa-circRNA10441-21	HSA_CIRCpedia_12208	exon	POLE2	2.48724	2.06667e-21
chr20:3925824|3955047	hsa-RNF24_0005	hsa_circ_0005736	hsa_circ_15519	hsa-circRNA12976-4	HSA_CIRCpedia_34211	exon	RNF24	2.48624	1.15796e-09
chr11:85692788|85695016	hsa-PICALM_0059	hsa_circ_0008773	hsa_circ_12521	hsa-circRNA9655-10	HSA_CIRCpedia_5879	exon	PICALM	2.48527	8.0767e-12
chr17:1264386|1265302	hsa-YWHAE_0003	hsa_circ_0007643	hsa_circ_05624	hsa-circRNA11254-5	HSA_CIRCpedia_19274	exon	YWHAE	2.48432	1.69914e-11
chr11:120347370|120348235	hsa-ARHGEF12_0044	hsa_circ_0002089	hsa_circ_24109	hsa-circRNA1579-36	HSA_CIRCpedia_3512	exon	ARHGEF12	2.48331	5.54215e-14
chr14:45587231|45599993	hsa-FKBP3_0002	-	-	hsa-circRNA10438-1	-	exon	FKBP3	2.4784	5.40005e-09
chr12:112743868|112757546	hsa-HECTD4_0003	hsa_circ_0028411	hsa_circ_11956	hsa-circRNA10125-125	HSA_CIRCpedia_6868	exon	HECTD4	2.47552	5.75359e-13
chr4:39734979|39747430	hsa-UBE2K_0019	-	-	-	-	intron	UBE2K	2.47454	1.09776e-06
chr18:19345733|19359646	hsa-MIB1_0003	hsa_circ_0000835	hsa_circ_23867	hsa-circRNA3625-48	HSA_CIRCpedia_23331	exon	MIB1	2.47019	8.1964e-11
chr3:167437850|167443261	hsa-PDCD10_0008	-	-	hsa-circRNA13818-4	HSA_CIRCpedia_44303	exon	PDCD10	2.47003	9.91006e-12
chr12:112645678|112657293	hsa-HECTD4_0129	hsa_circ_0028381	-	hsa-circRNA10125-114	HSA_CIRCpedia_72413	exon	HECTD4	2.46981	2.81589e-09
chr6:159001972|159010814	hsa-TMEM181_0002	hsa_circ_0001661	hsa_circ_29918	hsa-circRNA6946-4	HSA_CIRCpedia_54181	exon	TMEM181	2.46943	4.92231e-13
chr16:31733947|31734674	hsa-ZNF720_0001	hsa_circ_0007059	hsa_circ_25507	hsa-circRNA2982-4	HSA_CIRCpedia_17498	exon	ZNF720	2.46929	4.37554e-12
chr8:131179782|131370389	hsa-ASAP1_0017	hsa_circ_0085604	-	hsa-circRNA15613-95	HSA_CIRCpedia_149708	exon	ASAP1	2.46602	2.09671e-09
chr1:67356837|67371058	hsa-WDR78_0005	hsa_circ_0006677	hsa_circ_09736	hsa-circRNA8543-6	HSA_CIRCpedia_32817	exon	WDR78	2.46304	6.9007e-08
chr5:138979957|139003046	hsa-UBE2D2_0005	hsa_circ_0004503	hsa_circ_11865	hsa-circRNA6460-4	HSA_CIRCpedia_50481	exon	UBE2D2	2.46149	3.10539e-11
chr6:111208708|111211559	hsa-AMD1_0001	hsa_circ_0005954	hsa_circ_11538	hsa-circRNA6861-7	HSA_CIRCpedia_53313	exon	AMD1	2.4593	1.78141e-11
chr4:71808540|71835741	hsa-MOB1B_0007	-	-	hsa-circRNA6014-5	HSA_CIRCpedia_49028	exon	MOB1B	2.45823	2.61215e-11
chr11:85692788|85693046	hsa-PICALM_0090	hsa_circ_0023904	hsa_circ_03143	hsa-circRNA9655-1	HSA_CIRCpedia_5878	exon	PICALM	2.45748	2.02153e-08
chr4:79747191|79782622	hsa-BMP2K_0023	-	-	hsa-circRNA6037-8	HSA_CIRCpedia_49242	exon	BMP2K	2.45654	7.62527e-10
chr9:80409379|80412564	hsa-GNAQ_0001	hsa_circ_0006459	hsa_circ_13985	hsa-circRNA15794-7	HSA_CIRCpedia_64472	exon	GNAQ	2.4549	1.39113e-12
chr8:71126138|71128999	hsa-NCOA2_0001	-	hsa_circ_22214	hsa-circRNA15517-10	HSA_CIRCpedia_61633	exon	NCOA2	2.454	2.95988e-10
chr2:175976296|175986268	hsa-ATF2_0004	hsa_circ_0007967	hsa_circ_17188	hsa-circRNA12784-26	HSA_CIRCpedia_38700	exon	ATF2	2.45119	1.42634e-14
chr9:140685300|140712590	hsa-EHMT1_0002	hsa_circ_0009134	hsa_circ_08039	hsa-circRNA7907-50	HSA_CIRCpedia_63542	exon	EHMT1	2.44782	5.3851e-11
chr17:58342773|58372162	hsa-USP32_0064	hsa_circ_0044949	hsa_circ_18760	hsa-circRNA11592-36	HSA_CIRCpedia_21724	exon	USP32	2.4474	8.17476e-15
chr20:62559688|62562375	hsa-DNAJC5_0001	hsa_circ_0007609	hsa_circ_01340	hsa-circRNA5113-4	HSA_CIRCpedia_34989	exon	DNAJC5	2.44663	2.95004e-12
chr20:57014001|57016139	hsa-VAPB_0004	hsa_circ_0001173	hsa_circ_15722	hsa-circRNA5081-8	HSA_CIRCpedia_34824	exon	VAPB	2.44469	1.57664e-07
chr19:13039156|13039661	hsa-FARSA_0001	hsa_circ_0000896	hsa_circ_23247	hsa-circRNA12030-2	HSA_CIRCpedia_24858	exon	FARSA	2.44336	1.52854e-10
chr9:86292642|86293514	hsa-UBQLN1_0011	hsa_circ_0001865	hsa_circ_00941	hsa-circRNA15802-5	HSA_CIRCpedia_64528	exon	UBQLN1	2.4396	1.98675e-10
chr12:124071294|124074996	hsa-TMED2_0001	hsa_circ_0000458	hsa_circ_20928	hsa-circRNA2039-4	HSA_CIRCpedia_7484	exon	TMED2	2.43555	1.44032e-08
chr4:144920564|144929602	hsa-GYPB_0003	-	-	hsa-circRNA14147-1	-	exon	GYPB	2.43498	1.54675e-09
chr4:154547299|154553990	hsa-KIAA0922_0009	hsa_circ_0071311	-	hsa-circRNA6148-21	HSA_CIRCpedia_47805	exon	TMEM131L	2.43096	2.86241e-10
chr1:51868107|51874004	hsa-EPS15_0014	hsa_circ_0005567	hsa_circ_31574	hsa-circRNA8505-49	HSA_CIRCpedia_32260	exon	EPS15	2.43017	9.21949e-10
chr13:113170754|113181798	hsa-TUBGCP3_0001	hsa_circ_0000504	hsa_circ_06318	hsa-circRNA10351-23	HSA_CIRCpedia_10108	exon	TUBGCP3	2.42921	1.49486e-16
chr2:128855003|128867320	hsa-UGGT1_0031	hsa_circ_0056401	hsa_circ_30923	hsa-circRNA4625-53	HSA_CIRCpedia_37822	exon	UGGT1	2.42665	3.41282e-14
chr8:41561559|41566493	hsa-ANK1_0004	-	-	hsa-circRNA15479-13	HSA_CIRCpedia_61071	exon	ANK1	2.4261	8.84935e-13
chr6:146125508|146127557	hsa-FBXO30_0001	-	hsa_circ_04205	hsa-circRNA14946	HSA_CIRCpedia_53811	exon	FBXO30	2.42567	1.24291e-09
chr8:41561559|41571772	hsa-ANK1_0042	hsa_circ_0084084	-	hsa-circRNA15479-5	-	exon	ANK1	2.4195	1.18265e-14
chr5:78936674|78964851	hsa-PAPD4_0014	hsa_circ_0002260	hsa_circ_19511	hsa-circRNA6339-17	HSA_CIRCpedia_52749	exon	TENT2	2.41614	1.19708e-11
chr14:102661275|102676199	hsa-WDR20_0001	hsa_circ_0002553	hsa_circ_12635	hsa-circRNA2438-2	HSA_CIRCpedia_11451	exon	WDR20	2.41604	8.17147e-08
chr1:26584088|26586293	hsa-CEP85_0006	hsa_circ_0000033	hsa_circ_07591	hsa-circRNA139-14	HSA_CIRCpedia_31113	exon	CEP85	2.41493	2.51309e-10
chr2:64800080|64812679	hsa-AFTPH_0009	hsa_circ_0006037	hsa_circ_20024	hsa-circRNA4460-12	HSA_CIRCpedia_42059	exon	AFTPH	2.41241	1.83104e-10
chr4:52729603|52744020	hsa-DCUN1D4_0001	hsa_circ_0001410	hsa_circ_09069	hsa-circRNA5987-15	HSA_CIRCpedia_48798	exon	DCUN1D4	2.41129	1.23173e-09
chr16:47531310|47549512	hsa-PHKB_0001	hsa_circ_0000698	hsa_circ_03008	hsa-circRNA2989-49	HSA_CIRCpedia_17704	exon	PHKB	2.41077	1.25851e-10
chrX:134679348|134683730	hsa-INTS6L_0006	-	hsa_circ_12076	hsa-circRNA8156-3	HSA_CIRCpedia_65268	exon	INTS6L	2.41009	5.17158e-14
chr11:108046973|108047817	hsa-NPAT_0014	hsa_circ_0006208	hsa_circ_27111	hsa-circRNA9696-6	HSA_CIRCpedia_3123	exon	NPAT	2.40732	8.89562e-09
chr1:180953813|180962561	hsa-STX6_0001	hsa_circ_0007905	hsa_circ_23135	hsa-circRNA8860-5	HSA_CIRCpedia_29090	exon	STX6	2.40329	2.10933e-11
chr10:74100547|74100928	hsa-DNAJB12_0003	hsa_circ_0008662	hsa_circ_31328	hsa-circRNA9171-9	HSA_CIRCpedia_2298	exon	DNAJB12	2.39678	7.20894e-11
chr19:17387304|17387718	hsa-CTD-2278I10_0001	hsa_circ_0003253	hsa_circ_04303	hsa-circRNA3925-2	HSA_CIRCpedia_25123	exon		2.39449	2.01792e-10
chr20:42331130|42333998	hsa-MYBL2_0002	hsa_circ_0006332	hsa_circ_31060	hsa-circRNA5028-31	HSA_CIRCpedia_34289	exon	MYBL2	2.3942	1.02775e-10
chr11:2972489|3000467	hsa-NAP1L4_0006	hsa_circ_0020816	hsa_circ_21205	hsa-circRNA9370-8	HSA_CIRCpedia_4056	exon	NAP1L4	2.39316	3.72054e-06
chr8:101281013|101300495	hsa-RNF19A_0016	hsa_circ_0085125	-	hsa-circRNA15562-11	HSA_CIRCpedia_59629	exon	RNF19A	2.39236	4.6878e-14
chr17:58346811|58348842	hsa-USP32_0003	hsa_circ_0007272	hsa_circ_25107	hsa-circRNA11592-41	HSA_CIRCpedia_21726	exon	USP32	2.38742	1.09757e-09
chr4:1902353|1906105	hsa-WHSC1_0005	hsa_circ_0008460	hsa_circ_19826	hsa-circRNA5886-40	HSA_CIRCpedia_48160	exon	NSD2	2.38643	5.78958e-13
chr1:155691308|155695810	hsa-DAP3_0005	hsa_circ_0014613	hsa_circ_20757	hsa-circRNA550-11	HSA_CIRCpedia_28217	exon	DAP3	2.38581	3.09248e-09
chr17:53478830|53481229	hsa-MMD_0003	hsa_circ_0002015	hsa_circ_22812	hsa-circRNA11561-9	HSA_CIRCpedia_21490	exon	MMD	2.38138	1.00721e-11
chr1:171537386|171544267	hsa-PRRC2C_0007	hsa_circ_0004412	hsa_circ_25596	hsa-circRNA620-20	HSA_CIRCpedia_28716	exon	PRRC2C	2.38023	9.25404e-12
chr20:32617575|32619410	hsa-RALY_0012	-	-	hsa-circRNA4984-9	-	intron	RALY	2.37985	2.89885e-11
chr8:37967897|37968351	hsa-ASH2L_0027	hsa_circ_0083952	hsa_circ_06554	hsa-circRNA7420-6	HSA_CIRCpedia_60938	exon	ASH2L	2.37899	6.62719e-11
chr19:17212470|17213367	hsa-MYO9B_0005	hsa_circ_0000907	hsa_circ_12544	hsa-circRNA3921-4	HSA_CIRCpedia_25087	exon	MYO9B	2.37748	5.76834e-11
chr8:101718879|101719225	hsa-PABPC1_0020	hsa_circ_0006623	hsa_circ_22263	hsa-circRNA15564-30	HSA_CIRCpedia_59646	exon	PABPC1	2.37536	1.33801e-07
chr14:50796551|50808940	hsa-CDKL1_0003	-	-	-	-	exon	CDKL1	2.37461	4.25415e-10
chr17:45206759|45249430	hsa-CDC27_0009	-	-	hsa-circRNA11531-4	HSA_CIRCpedia_21119	exon	CDC27	2.3685	2.9691e-12
chr5:72157635|72161556	hsa-TNPO1_0043	hsa_circ_0002692	hsa_circ_03028	hsa-circRNA6312-12	HSA_CIRCpedia_52479	exon	TNPO1	2.36824	1.28696e-06
chr12:112641440|112642427	hsa-HECTD4_0020	-	hsa_circ_30008	hsa-circRNA10125-127	HSA_CIRCpedia_6816	exon	HECTD4	2.36793	5.12862e-11
chr8:41519319|41521260	hsa-ANK1_0007	hsa_circ_0007366	hsa_circ_07145	hsa-circRNA15479-15	HSA_CIRCpedia_61066	exon	ANK1	2.36233	9.24655e-10
chr8:100587886|100597745	hsa-VPS13B_0123	-	-	-	-	intron	VPS13B	2.361	4.91934e-12
chr17:1540003|1540356	hsa-SCARF1_0001	hsa_circ_0000732	hsa_circ_12419	hsa-circRNA11261	HSA_CIRCpedia_19332	exon	SCARF1	2.36078	1.89362e-11
chr22:41738533|41739580	hsa-ZC3H7B_0019	hsa_circ_0001236	hsa_circ_14216	hsa-circRNA5348-3	HSA_CIRCpedia_36856	exon	ZC3H7B	2.3578	6.98453e-12
chrX:134679348|134686071	hsa-INTS6L_0002	-	hsa_circ_26061	hsa-circRNA8156-7	HSA_CIRCpedia_65269	exon	INTS6L	2.35649	2.27945e-12
chr4:140037803|140060651	hsa-ELF2_0003	hsa_circ_0007710	-	hsa-circRNA14136-9	HSA_CIRCpedia_47470	exon	ELF2	2.35615	2.99962e-11
chr1:111690264|111703918	hsa-CEPT1_0004	hsa_circ_0000106	hsa_circ_20760	hsa-circRNA446-11	HSA_CIRCpedia_27269	exon	CEPT1	2.35338	3.49685e-12
chr3:157839892|157841780	hsa-RSRC1_0001	hsa_circ_0001355	hsa_circ_21020	hsa-circRNA5788-2	HSA_CIRCpedia_44226	exon	RSRC1	2.35195	5.21342e-06
chr3:50145503|50145737	hsa-RBM5_0023	hsa_circ_0001305	hsa_circ_00764	hsa-circRNA5571-46	HSA_CIRCpedia_46206	exon	RBM5	2.35173	9.50932e-12
chr14:95606996|95608085	hsa-DICER1_0004	hsa_circ_0000564	hsa_circ_16285	hsa-circRNA10577-7	HSA_CIRCpedia_13526	exon	DICER1	2.35041	3.02131e-16
chr8:131164982|131193126	hsa-ASAP1_0002	hsa_circ_0008934	hsa_circ_09642	hsa-circRNA15613-7	HSA_CIRCpedia_60082	exon	ASAP1	2.34442	0.0166418
chr11:73843889|73844602	hsa-C2CD3_0013	hsa_circ_0023558	hsa_circ_24565	hsa-circRNA9623-33	HSA_CIRCpedia_5584	exon	C2CD3	2.3439	1.97485e-09
chr10:13705453|13717044	hsa-FRMD4A_0009	hsa_circ_0004373	hsa_circ_31868	hsa-circRNA9055-28	HSA_CIRCpedia_1067	exon	FRMD4A	2.34166	1.72233e-10
chr2:15629018|15651474	hsa-NBAS_0001	hsa_circ_0000978	hsa_circ_22387	hsa-circRNA12412-40	HSA_CIRCpedia_38231	exon	NBAS	2.33982	5.90252e-11
chr3:149563798|149589941	hsa-RNF13_0017	hsa_circ_0067716	hsa_circ_00213	hsa-circRNA5772-23	HSA_CIRCpedia_43986	exon	RNF13	2.3353	1.27988e-12
chr19:50902108|50902741	hsa-POLD1_0002	hsa_circ_0052012	hsa_circ_29352	hsa-circRNA4225-14	HSA_CIRCpedia_26513	exon	POLD1	2.33526	3.0566e-12
chr1:207867698|207874963	hsa-CR1L_0004	-	-	hsa-circRNA721-9	HSA_CIRCpedia_351396	exon	CR1L	2.33147	6.43459e-11
chr3:56661065|56662642	hsa-FAM208A_0029	hsa_circ_0001314	hsa_circ_32430	hsa-circRNA13601-33	HSA_CIRCpedia_46451	exon	TASOR	2.33057	2.39231e-08
chr1:229661683|229678118	hsa-ABCB10_0006	-	-	hsa-circRNA8981-21	HSA_CIRCpedia_30443	exon	ABCB10	2.32888	7.01946e-11
chr1:155896467|155896947	hsa-KIAA0907_0013	hsa_circ_0008339	hsa_circ_16400	hsa-circRNA8782-3	HSA_CIRCpedia_28267	exon	KHDC4	2.32469	5.15166e-10
chr15:66021410|66053776	hsa-DENND4A_0091	hsa_circ_0035947	hsa_circ_10119	hsa-circRNA10790-24	HSA_CIRCpedia_15324	exon	DENND4A	2.32407	3.39217e-09
chr12:51375422|51404549	hsa-SLC11A2_0003	-	-	hsa-circRNA9934-6	HSA_CIRCpedia_8758	exon	SLC11A2	2.32171	1.69851e-10
chr5:150838349|150859050	hsa-SLC36A1_0002	hsa_circ_0074623	hsa_circ_17131	hsa-circRNA6503-7	HSA_CIRCpedia_50836	exon	SLC36A1	2.32169	1.97987e-10
chr5:14741936|14758707	hsa-ANKH_0005	hsa_circ_0003057	hsa_circ_26623	hsa-circRNA14245-4	HSA_CIRCpedia_50731	exon	ANKH	2.32153	2.9536e-10
chr11:85711686|85742653	hsa-PICALM_0015	hsa_circ_0023928	-	hsa-circRNA9655-4	HSA_CIRCpedia_5898	exon	PICALM	2.32113	6.56167e-12
chr1:213037067|213058738	hsa-FLVCR1_0001	hsa_circ_0000182	hsa_circ_05558	hsa-circRNA736-11	HSA_CIRCpedia_29909	exon	FLVCR1	2.32097	6.8765e-11
chr13:61013822|61041513	hsa-TDRD3_0001	hsa_circ_0003441	hsa_circ_07183	hsa-circRNA2153-18	HSA_CIRCpedia_11021	exon	TDRD3	2.31893	4.89582e-11
chr16:1866894|1873038	hsa-HAGH_0006	hsa_circ_0007865	hsa_circ_06062	hsa-circRNA10935-2	HSA_CIRCpedia_16724	exon	HAGH	2.31788	3.05666e-10
chr22:41521868|41523752	hsa-EP300_0020	hsa_circ_0008174	hsa_circ_22834	hsa-circRNA5346-50	HSA_CIRCpedia_36800	exon	EP300	2.31649	2.79924e-11
chr22:30366965|30375041	hsa-MTMR3_0004	hsa_circ_0006303	hsa_circ_08933	hsa-circRNA5285-13	HSA_CIRCpedia_36338	exon	MTMR3	2.31579	7.09616e-14
chr1:167988783|167992285	hsa-DCAF6_0008	-	-	-	-	exon	DCAF6	2.31501	3.42926e-09
chr10:70190193|70190417	hsa-DNA2_0016	-	-	hsa-circRNA9158-40	HSA_CIRCpedia_2055	exon	DNA2	2.31416	4.86375e-11
chr18:55230106|55247431	hsa-FECH_0016	-	-	-	HSA_CIRCpedia_150343	exon	FECH	2.31067	1.76668e-12
chr20:30370052|30385318	hsa-TPX2_0016	hsa_circ_0003209	hsa_circ_18136	hsa-circRNA4965-4	HSA_CIRCpedia_33626	exon	TPX2	2.3096	1.07574e-08
chr7:91924203|91957214	hsa-ANKIB1_0015	-	hsa_circ_31271	hsa-circRNA7149-15	HSA_CIRCpedia_59277	exon	ANKIB1	2.30876	2.86593e-10
chr3:142151503|142151735	hsa-XRN1_0054	hsa_circ_0067621	hsa_circ_00370	hsa-circRNA13772-9	HSA_CIRCpedia_43898	exon	XRN1	2.30729	7.75972e-12
chr16:9014216|9024254	hsa-USP7_0011	hsa_circ_0008638	hsa_circ_31120	hsa-circRNA10984-2	HSA_CIRCpedia_19233	exon	USP7	2.3054	1.24733e-07
chr7:44739740|44741214	hsa-OGDH_0017	hsa_circ_0009092	hsa_circ_01814	hsa-circRNA7063-4	HSA_CIRCpedia_58140	exon	OGDH	2.30537	6.89894e-12
chr17:4092677|4096155	hsa-ANKFY1_0025	-	-	-	-	intron	ANKFY1	2.30374	2.72206e-07
chr3:15073886|15076316	hsa-NR2C2_0015	hsa_circ_0064460	hsa_circ_01306	hsa-circRNA5448-24	HSA_CIRCpedia_44036	exon	NR2C2	2.30232	1.8227e-11
chr2:202625604|202626541	hsa-ALS2_0048	hsa_circ_0001093	hsa_circ_29889	hsa-circRNA12849-1	HSA_CIRCpedia_39186	exon	ALS2	2.30217	1.96872e-10
chrX:53641495|53642796	hsa-HUWE1_0010	hsa_circ_0007817	hsa_circ_00261	hsa-circRNA16135-58	HSA_CIRCpedia_66059	exon	HUWE1	2.30134	1.40372e-12
chr5:36953720|36976504	hsa-NIPBL_0008	hsa_circ_0001472	hsa_circ_06135	hsa-circRNA6244-11	HSA_CIRCpedia_51669	exon	NIPBL	2.30112	4.5124e-09
chr15:41648237|41668026	hsa-NUSAP1_0011	hsa_circ_0008926	hsa_circ_15269	hsa-circRNA2536-13	HSA_CIRCpedia_14215	exon	NUSAP1	2.30027	7.3643e-08
chr5:109152974|109159538	hsa-MAN2A1_0013	-	hsa_circ_05323	hsa-circRNA6380-1	HSA_CIRCpedia_49815	exon	MAN2A1	2.29978	6.35446e-12
chr15:93496587|93499879	hsa-CHD2_0007	hsa_circ_0036984	hsa_circ_21401	hsa-circRNA2740-39	HSA_CIRCpedia_16200	exon	CHD2	2.29887	3.73718e-11
chr10:6001717|6002530	hsa-IL15RA_0002	hsa_circ_0007403	hsa_circ_07346	hsa-circRNA9041-4	HSA_CIRCpedia_1886	exon	IL15RA	2.29832	6.1119e-14
chr1:25666965|25678184	hsa-TMEM50A_0007	hsa_circ_0007054	hsa_circ_07036	hsa-circRNA129-8	HSA_CIRCpedia_31072	exon	TMEM50A	2.29666	1.17072e-11
chr2:15601325|15618413	hsa-NBAS_0039	hsa_circ_0008083	hsa_circ_21102	hsa-circRNA12412-103	HSA_CIRCpedia_38224	exon	NBAS	2.29361	2.42405e-12
chr18:74561482|74593468	hsa-ZNF236_0004	hsa_circ_0000857	hsa_circ_12372	hsa-circRNA3715-25	HSA_CIRCpedia_24316	exon	ZNF236	2.29321	5.35659e-14
chr8:131164982|131181313	hsa-ASAP1_0003	hsa_circ_0001824	hsa_circ_04150	hsa-circRNA15613-23	HSA_CIRCpedia_60081	exon	ASAP1	2.29161	7.56244e-09
chr11:85707869|85712201	hsa-PICALM_0089	hsa_circ_0002513	hsa_circ_01188	hsa-circRNA9655-8	HSA_CIRCpedia_5889	exon	PICALM	2.28984	2.31199e-11
chr16:14720963|14721193	hsa-PARN_0035	hsa_circ_0002771	hsa_circ_20772	hsa-circRNA11004-46	HSA_CIRCpedia_16440	exon	PARN	2.28979	9.93584e-10
chr4:154501978|154510159	hsa-KIAA0922_0001	-	-	hsa-circRNA6148-23	HSA_CIRCpedia_47794	exon	TMEM131L	2.28883	1.49488e-11
chr16:68835573|68849662	hsa-CDH1_0023	hsa_circ_0039990	-	hsa-circRNA3077-5	HSA_CIRCpedia_18309	exon	CDH1	2.28758	2.46121e-10
chr12:6618883|6620418	hsa-NCAPD2_0003	hsa_circ_0025148	-	hsa-circRNA1649-20	HSA_CIRCpedia_9351	exon	NCAPD2	2.28752	1.73761e-14
chr12:42604157|42604482	hsa-YAF2_0012	hsa_circ_0000392	-	hsa-circRNA9892-1	HSA_CIRCpedia_8400	exon	YAF2	2.28622	4.12858e-10
chr9:139115853|139118720	hsa-QSOX2_0003	-	hsa_circ_27506	hsa-circRNA15988-8	HSA_CIRCpedia_63411	exon	QSOX2	2.28612	4.75603e-10
chr10:4872867|4889491	hsa-AKR1E2_0004	hsa_circ_0017523	hsa_circ_24870	hsa-circRNA834-7	HSA_CIRCpedia_1721	exon	AKR1E2	2.28544	2.91955e-15
chr7:138758602|138774505	hsa-ZC3HAV1_0002	hsa_circ_0082626	-	hsa-circRNA15339-19	HSA_CIRCpedia_56941	exon	ZC3HAV1	2.28459	5.79277e-13
chr17:57808782|57816308	hsa-VMP1_0001	hsa_circ_0006508	hsa_circ_09046	hsa-circRNA3464-34	HSA_CIRCpedia_21660	exon	VMP1	2.28162	1.69098e-07
chr1:114450631|114450813	hsa-DCLRE1B_0002	hsa_circ_0013615	-	hsa-circRNA461-2	HSA_CIRCpedia_27408	exon	DCLRE1B	2.27969	4.15571e-11
chr11:16339992|16362798	hsa-SOX6_0001	-	hsa_circ_07043	hsa-circRNA9424-6	HSA_CIRCpedia_3831	exon	SOX6	2.27927	2.49107e-11
chr8:42914235|42919358	hsa-RP11-598P20_0003	hsa_circ_0001796	hsa_circ_02340	hsa-circRNA7440-5	HSA_CIRCpedia_61171	exon		2.27839	5.05276e-10
chr16:24043457|24046868	hsa-PRKCB_0001	hsa_circ_0000682	hsa_circ_15387	hsa-circRNA2911-27	HSA_CIRCpedia_17068	exon	PRKCB	2.27808	1.33028e-10
chrX:10031485|10066619	hsa-WWC3_0004	hsa_circ_0001910	hsa_circ_13428	hsa-circRNA7927-12	HSA_CIRCpedia_64904	exon	WWC3	2.27745	5.8027e-09
chr4:83793097|83796975	hsa-SEC31A_0017	hsa_circ_0003549	hsa_circ_27215	hsa-circRNA14048-42	HSA_CIRCpedia_49304	exon	SEC31A	2.27663	4.08443e-07
chr11:16119155|16208501	hsa-SOX6_0002	hsa_circ_0021347	hsa_circ_08385	hsa-circRNA9424-17	HSA_CIRCpedia_119465	exon	SOX6	2.2757	2.24952e-07
chr7:23650790|23651172	hsa-CCDC126_0001	hsa_circ_0001684	hsa_circ_31833	hsa-circRNA7009-2	HSA_CIRCpedia_57682	exon	CCDC126	2.27334	2.80388e-10
chr7:148516070|148516779	hsa-EZH2_0018	-	hsa_circ_30974	hsa-circRNA15355-24	HSA_CIRCpedia_57165	exon	EZH2	2.2733	7.66521e-10
chr7:151181823|151195266	hsa-RHEB_0003	hsa_circ_0004779	-	hsa-circRNA15377-3	HSA_CIRCpedia_57235	exon	RHEB	2.27155	1.62303e-09
chr10:127483449|127486714	hsa-UROS_0007	-	-	hsa-circRNA9328-11	HSA_CIRCpedia_872	exon	UROS	2.27031	3.73718e-11
chr2:197004344|197010779	hsa-STK17B_0001	-	-	hsa-circRNA12823-4	HSA_CIRCpedia_38967	exon	STK17B	2.27005	3.57924e-12
chr20:35693827|35696589	hsa-RBL1_0002	-	hsa_circ_29992	hsa-circRNA13043-38	HSA_CIRCpedia_34084	exon	RBL1	2.2685	3.27102e-13
chr2:202272126|202285429	hsa-TRAK2_0002	-	-	-	HSA_CIRCpedia_93318	exon	TRAK2	2.26823	3.1656e-10
chr4:54292039|54294350	hsa-FIP1L1_0006	hsa_circ_0069748	hsa_circ_06576	hsa-circRNA5991-16	HSA_CIRCpedia_48832	exon	FIP1L1	2.26605	1.48797e-11
chr3:195780289|195787118	hsa-TFRC_0017	hsa_circ_0068604	-	hsa-circRNA13887-49	HSA_CIRCpedia_44992	exon	TFRC	2.26356	1.5793e-09
chr13:26974590|26975761	hsa-CDK8_0004	hsa_circ_0003489	hsa_circ_27078	hsa-circRNA2084-1	HSA_CIRCpedia_10451	exon	CDK8	2.26256	1.07695e-10
chr3:20113887|20193857	hsa-KAT2B_0035	-	-	-	-	exon	KAT2B	2.26046	4.17801e-10
chr16:67662273|67663436	hsa-CTCF_0008	hsa_circ_0008272	hsa_circ_32741	hsa-circRNA3059-25	HSA_CIRCpedia_18197	exon	CTCF	2.25945	2.74175e-11
chr3:182602541|182605501	hsa-ATP11B_0067	hsa_circ_0068142	hsa_circ_01759	hsa-circRNA5821-15	HSA_CIRCpedia_44582	exon	ATP11B	2.25743	1.67551e-07
chr15:90431753|90432372	hsa-C15orf38-AP3S2_0001	hsa_circ_0002080	hsa_circ_05649	hsa-circRNA10889-8	HSA_CIRCpedia_16086	exon	ARPIN-AP3S2	2.25524	2.34175e-09
chr1:42730786|42744343	hsa-FOXJ3_0001	hsa_circ_0006848	hsa_circ_03825	hsa-circRNA8467-22	HSA_CIRCpedia_31911	exon	FOXJ3	2.25412	3.57924e-12
chr9:100756913|100760960	hsa-ANP32B_0003	hsa_circ_0006609	hsa_circ_08127	hsa-circRNA7738-5	HSA_CIRCpedia_61984	exon	ANP32B	2.25338	4.17389e-08
chr4:25128886|25160729	hsa-SEPSECS_0006	hsa_circ_0069335	hsa_circ_03752	hsa-circRNA13971-9	HSA_CIRCpedia_48253	exon	SEPSECS	2.25234	7.98826e-12
chr1:161748034|161753886	hsa-ATF6_0021	hsa_circ_0003039	hsa_circ_22954	hsa-circRNA596-19	HSA_CIRCpedia_28481	exon	ATF6	2.25209	3.61511e-11
chr5:179688684|179707608	hsa-MAPK9_0004	hsa_circ_0001566	hsa_circ_26286	hsa-circRNA14561-9	HSA_CIRCpedia_51436	exon	MAPK9	2.25136	2.69377e-10
chr15:90760671|90764997	hsa-SEMA4B_0001	hsa_circ_0000650	hsa_circ_09164	hsa-circRNA2725-21	HSA_CIRCpedia_16097	exon	SEMA4B	2.25101	7.73695e-12
chr7:132738877|132739917	hsa-CHCHD3_0009	hsa_circ_0001748	-	hsa-circRNA15322-1	-	intron	CHCHD3	2.25081	8.67492e-10
chr6:17669206|17669777	hsa-NUP153_0031	hsa_circ_0002049	hsa_circ_21827	hsa-circRNA14605-8	HSA_CIRCpedia_54493	exon	NUP153	2.25055	1.57603e-11
chr11:85707869|85718626	hsa-PICALM_0056	hsa_circ_0023920	hsa_circ_09133	hsa-circRNA9655-28	HSA_CIRCpedia_5891	exon	PICALM	2.24941	2.05157e-09
chr1:155408118|155408859	hsa-ASH1L_0016	hsa_circ_0000137	hsa_circ_12304	hsa-circRNA8777-62	HSA_CIRCpedia_28184	exon	ASH1L	2.24903	9.64256e-08
chr1:154223517|154224129	hsa-UBAP2L_0041	hsa_circ_0004717	hsa_circ_32854	hsa-circRNA529-4	HSA_CIRCpedia_28095	exon	UBAP2L	2.24791	3.55227e-11
chr15:66015186|66053776	hsa-DENND4A_0037	-	hsa_circ_20863	hsa-circRNA10790-58	HSA_CIRCpedia_144279	exon	DENND4A	2.2453	6.57341e-15
chr15:66015186|66048810	hsa-DENND4A_0034	hsa_circ_0004367	hsa_circ_30255	hsa-circRNA10790-1	HSA_CIRCpedia_15320	exon	DENND4A	2.24106	1.47193e-08
chr11:16068060|16119234	hsa-SOX6_0011	-	hsa_circ_12447	-	HSA_CIRCpedia_73554	exon	SOX6	2.24056	3.39584e-10
chr1:78183552|78191447	hsa-USP33_0017	hsa_circ_0000087	hsa_circ_03871	hsa-circRNA8568-35	HSA_CIRCpedia_32934	exon	USP33	2.23729	6.8759e-13
chr22:38208894|38209616	hsa-GCAT_0001	hsa_circ_0007513	hsa_circ_20555	hsa-circRNA5324-1	HSA_CIRCpedia_36628	exon	GCAT	2.23438	2.15911e-09
chr11:32948703|32956981	hsa-QSER1_0021	hsa_circ_0021570	hsa_circ_16114	hsa-circRNA1277-7	HSA_CIRCpedia_4112	exon	QSER1	2.2334	2.03987e-06
chr17:65924471|65925603	hsa-BPTF_0022	hsa_circ_0004392	hsa_circ_08035	hsa-circRNA3488-62	HSA_CIRCpedia_22180	exon	BPTF	2.2328	1.9125e-10
chr4:88116476|88116842	hsa-KLHL8_0015	hsa_circ_0002538	hsa_circ_14460	hsa-circRNA14061-3	HSA_CIRCpedia_49510	exon	KLHL8	2.23251	5.6128e-07
chr15:64039117|64040057	hsa-HERC1_0042	-	hsa_circ_18526	hsa-circRNA10768-17	HSA_CIRCpedia_15121	exon	HERC1	2.23243	6.82901e-14
chr15:63956669|63958671	hsa-HERC1_0037	-	hsa_circ_00843	hsa-circRNA10768-12	HSA_CIRCpedia_67535	exon	HERC1	2.23103	3.57924e-12
chr11:118650341|118657227	hsa-DDX6_0003	hsa_circ_0006588	hsa_circ_05983	hsa-circRNA9727-13	HSA_CIRCpedia_3426	exon	DDX6	2.22978	1.01658e-10
chr1:207867698|207891036	hsa-CR1L_0003	-	-	hsa-circRNA721-11	HSA_CIRCpedia_29703	exon	CR1L	2.22958	6.64846e-13
chr2:220077109|220079804	hsa-ATG9A_0001	hsa_circ_0058346	hsa_circ_32665	hsa-circRNA12890-3	HSA_CIRCpedia_39767	exon	ATG9A	2.22946	5.63901e-12
chr4:144359152|144361535	hsa-GAB1_0004	hsa_circ_0071041	hsa_circ_30295	hsa-circRNA6129-7	HSA_CIRCpedia_47535	exon	GAB1	2.22748	4.88938e-11
chr3:130649260|130660543	hsa-ATP2C1_0004	hsa_circ_0005797	hsa_circ_06505	hsa-circRNA5725-5	HSA_CIRCpedia_43539	exon	ATP2C1	2.22687	1.83303e-10
chr18:44470543|44483598	hsa-PIAS2_0031	-	-	hsa-circRNA11799-9	HSA_CIRCpedia_23883	exon	PIAS2	2.22531	4.90518e-09
chrY:2821950|2829687	hsa-ZFY_0001	hsa_circ_0001953	hsa_circ_11565	hsa-circRNA8216-1	HSA_CIRCpedia_66515	exon	ZFY	2.22513	5.5621e-07
chr4:22403054|22404422	hsa-ADGRA3_0008	hsa_circ_0002785	hsa_circ_10654	hsa-circRNA13965-14	HSA_CIRCpedia_48223	exon	ADGRA3	2.22446	6.96657e-10
chr20:45874752|45878183	hsa-ZMYND8_0006	hsa_circ_0001163	hsa_circ_00092	hsa-circRNA13084-16	HSA_CIRCpedia_34415	exon	ZMYND8	2.22371	6.21023e-09
chr10:31661947|31676195	hsa-ZEB1_0004	hsa_circ_0000228	hsa_circ_01777	hsa-circRNA897-2	HSA_CIRCpedia_1449	exon	ZEB1	2.22294	1.62936e-08
chr1:167992226|168014465	hsa-DCAF6_0002	-	-	hsa-circRNA611-31	HSA_CIRCpedia_28603	exon	DCAF6	2.22274	3.05591e-10
chr20:43108625|43118752	hsa-TTPAL_0004	-	-	-	-	exon	TTPAL	2.21913	3.15821e-10
chr1:213037067|213046160	hsa-FLVCR1_0003	-	hsa_circ_31801	hsa-circRNA736-2	HSA_CIRCpedia_29908	exon	FLVCR1	2.21671	1.04932e-10
chr22:41349559|41363888	hsa-RBX1_0001	hsa_circ_0004469	hsa_circ_01843	hsa-circRNA5345-4	HSA_CIRCpedia_36795	exon	RBX1	2.21635	1.22368e-09
chr6:79752560|79770535	hsa-PHIP_0001	hsa_circ_0001615	hsa_circ_16821	hsa-circRNA14811-58	HSA_CIRCpedia_55589	exon	PHIP	2.21557	6.58232e-09
chr3:12976948|12983365	hsa-IQSEC1_0001	hsa_circ_0064388	hsa_circ_03507	hsa-circRNA13440-4	HSA_CIRCpedia_43533	exon	IQSEC1	2.21521	3.10442e-12
chr1:1747195|1770677	hsa-GNB1_0017	hsa_circ_0008702	hsa_circ_11747	hsa-circRNA8255-28	HSA_CIRCpedia_28866	exon	GNB1	2.2152	7.20271e-10
chr17:45297270|45300423	hsa-MYL4_0003	-	-	-	-	exon	MYL4	2.2151	1.545e-08
chr11:77394755|77404656	hsa-RSF1_0023	hsa_circ_0000344	hsa_circ_16062	hsa-circRNA9637-13	HSA_CIRCpedia_5717	exon	RSF1	2.21301	5.59294e-08
chr11:120346049|120348235	hsa-ARHGEF12_0043	hsa_circ_0002955	hsa_circ_00069	hsa-circRNA1579-39	HSA_CIRCpedia_3511	exon	ARHGEF12	2.20882	7.2324e-09
chr4:79747191|79800045	hsa-BMP2K_0005	-	hsa_circ_27209	-	HSA_CIRCpedia_49245	exon	BMP2K	2.20875	5.1384e-09
chr17:66446869|66449133	hsa-WIPI1_0002	hsa_circ_0003142	hsa_circ_03380	hsa-circRNA11632-19	HSA_CIRCpedia_22226	exon	WIPI1	2.20808	6.66511e-10
chr1:1158624|1159348	hsa-SDF4_0001	hsa_circ_0000002	hsa_circ_21644	hsa-circRNA8241-5	HSA_CIRCpedia_27442	exon	SDF4	2.20374	1.00996e-09
chr21:47768926|47769734	hsa-PCNT_0003	hsa_circ_0002903	hsa_circ_16224	hsa-circRNA5198-38	HSA_CIRCpedia_35773	exon	PCNT	2.20232	8.84256e-06
chr4:147227078|147230127	hsa-SLC10A7_0015	-	-	hsa-circRNA14153-6	-	intron	SLC10A7	2.20181	3.93827e-09
chr8:101271335|101300495	hsa-RNF19A_0012	-	-	-	-	exon	RNF19A	2.20105	3.66261e-11
chr10:13701323|13705509	hsa-FRMD4A_0010	hsa_circ_0004281	hsa_circ_02665	hsa-circRNA9055-20	HSA_CIRCpedia_1062	exon	FRMD4A	2.19948	2.93189e-09
chr22:22153301|22162135	hsa-MAPK1_0003	hsa_circ_0004872	hsa_circ_27008	hsa-circRNA13256-15	HSA_CIRCpedia_36056	exon	MAPK1	2.19921	2.80388e-10
chr3:122942406|122978436	hsa-SEC22A_0001	hsa_circ_0002236	hsa_circ_00438	hsa-circRNA5698-2	HSA_CIRCpedia_43222	exon	SEC22A	2.19731	1.28857e-10
chr1:21083659|21107033	hsa-HP1BP3_0018	hsa_circ_0002437	hsa_circ_29570	hsa-circRNA8345-5	HSA_CIRCpedia_29771	exon	HP1BP3	2.19674	5.87047e-11
chr15:63915014|63916526	hsa-HERC1_0169	-	hsa_circ_17757	hsa-circRNA10768-101	HSA_CIRCpedia_15064	exon	HERC1	2.19386	8.87549e-10
chr15:69713986|69714774	hsa-KIF23_0002	hsa_circ_0004266	hsa_circ_09885	hsa-circRNA2639-1	HSA_CIRCpedia_15447	exon	KIF23	2.19115	1.06208e-13
chr17:18768782|18814564	hsa-PRPSAP2_0001	hsa_circ_0004488	hsa_circ_29336	hsa-circRNA3276-7	HSA_CIRCpedia_19602	exon	PRPSAP2	2.19104	5.04976e-12
chr17:19861327|19861884	hsa-AKAP10_0034	hsa_circ_0004719	hsa_circ_17365	hsa-circRNA11379-26	HSA_CIRCpedia_19685	exon	AKAP10	2.18926	1.54279e-09
chr17:45206759|45221348	hsa-CDC27_0003	hsa_circ_0044223	-	hsa-circRNA11531-16	HSA_CIRCpedia_21117	exon	CDC27	2.18899	1.5156e-10
chr1:248023919|248031365	hsa-TRIM58_0001	-	hsa_circ_29904	-	HSA_CIRCpedia_140572	exon	TRIM58	2.18645	1.20525e-09
chr16:71692136|71713438	hsa-PHLPP2_0047	hsa_circ_0005638	hsa_circ_07319	hsa-circRNA11169-45	HSA_CIRCpedia_18594	exon	PHLPP2	2.18644	2.72508e-15
chr6:17669524|17675264	hsa-NUP153_0017	hsa_circ_0075737	-	hsa-circRNA14605-4	HSA_CIRCpedia_54497	exon	NUP153	2.18537	6.99295e-11
chr10:11523769|11527910	hsa-USP6NL_0007	hsa_circ_0017683	hsa_circ_26546	hsa-circRNA9047-3	HSA_CIRCpedia_435	exon	USP6NL	2.1833	8.88031e-11
chr20:30954187|30959677	hsa-ASXL1_0003	hsa_circ_0006922	-	hsa-circRNA4972-9	HSA_CIRCpedia_33659	exon	ASXL1	2.18176	4.21447e-08
chr20:47886479|47888287	hsa-ZNFX1_0002	hsa_circ_0008675	hsa_circ_21881	hsa-circRNA13090-16	HSA_CIRCpedia_34645	exon	ZNFX1	2.18048	1.4971e-10
chr16:1872301|1873038	hsa-HAGH_0005	hsa_circ_0037353	hsa_circ_24317	hsa-circRNA10935-12	HSA_CIRCpedia_16725	exon	HAGH	2.18038	2.49589e-08
chr5:139819704|139828890	hsa-ANKHD1-EIF4EBP3_0012	hsa_circ_0001541	hsa_circ_29804	hsa-circRNA6466-61	HSA_CIRCpedia_50505	exon	ANKHD1	2.1795	2.35917e-11
chr12:120995085|120998689	hsa-RNF10_0006	hsa_circ_0008803	hsa_circ_16471	hsa-circRNA2010-7	HSA_CIRCpedia_7135	exon	RNF10	2.17894	5.27488e-09
chr3:127980971|127983624	hsa-EEFSEC_0001	hsa_circ_0008759	hsa_circ_32442	hsa-circRNA5711-2	HSA_CIRCpedia_43460	exon	EEFSEC	2.17883	9.02395e-10
chr9:127670656|127674305	hsa-GOLGA1_0029	hsa_circ_0002883	hsa_circ_25896	hsa-circRNA15922-3	HSA_CIRCpedia_62751	exon	GOLGA1	2.1769	4.32737e-09
chr1:151288049|151288985	hsa-PI4KB_0002	hsa_circ_0006892	hsa_circ_25288	hsa-circRNA8725-10	HSA_CIRCpedia_27959	exon	PI4KB	2.17275	1.07292e-09
chr11:3752621|3752808	hsa-NUP98_0041	hsa_circ_0002350	hsa_circ_05561	hsa-circRNA9376-94	HSA_CIRCpedia_4313	exon	NUP98	2.17174	1.78558e-10
chr11:3794862|3797251	hsa-NUP98_0040	hsa_circ_0004960	hsa_circ_00568	hsa-circRNA9376-81	HSA_CIRCpedia_4336	exon	NUP98	2.17066	4.13308e-09
chr1:26772807|26774151	hsa-DHDDS_0004	hsa_circ_0000034	hsa_circ_19894	hsa-circRNA143-7	HSA_CIRCpedia_31125	exon	DHDDS	2.17057	8.39939e-13
chr8:117668095|117671219	hsa-EIF3H_0001	hsa_circ_0005231	hsa_circ_00938	hsa-circRNA15584-2	HSA_CIRCpedia_59870	exon	EIF3H	2.17024	2.72804e-10
chr17:59821793|59857762	hsa-BRIP1_0016	hsa_circ_0000794	hsa_circ_03722	hsa-circRNA11595-31	HSA_CIRCpedia_21800	exon	BRIP1	2.1692	2.28544e-09
chr7:30590252|30614497	hsa-AC005154_0001	-	-	hsa-circRNA15080-7	-	exon	GARS-DT	2.16848	8.57714e-11
chr16:30740287|30740893	hsa-RP11-2C24_0001	hsa_circ_0006127	hsa_circ_11077	hsa-circRNA2961-17	HSA_CIRCpedia_17450	exon	SRCAP	2.16845	5.41496e-13
chr5:72285254|72286691	hsa-FCHO2_0006	hsa_circ_0072954	hsa_circ_30712	hsa-circRNA6314-34	HSA_CIRCpedia_68642	exon	FCHO2	2.16451	8.32347e-06
chr1:29362338|29379824	hsa-EPB41_0072	hsa_circ_0011173	hsa_circ_31699	hsa-circRNA173-38	HSA_CIRCpedia_31264	exon	EPB41	2.16393	1.27008e-07
chr10:89266025|89280926	hsa-MINPP1_0006	-	-	-	-	intron	MINPP1	2.16137	1.22439e-10
chr15:77656416|77657567	hsa-PEAK1_0009	-	-	-	-	intron	PEAK1	2.16108	1.36859e-09
chr16:15973661|15978062	hsa-FOPNL_0001	hsa_circ_0003349	hsa_circ_00896	hsa-circRNA11013-4	HSA_CIRCpedia_16538	exon	FOPNL	2.15926	1.40527e-14
chr13:33306238|33309467	hsa-PDS5B_0015	hsa_circ_0004494	hsa_circ_29682	hsa-circRNA2099-18	HSA_CIRCpedia_10586	exon	PDS5B	2.15893	3.71758e-10
chr1:229662976|229685181	hsa-ABCB10_0005	-	hsa_circ_32888	-	HSA_CIRCpedia_30444	exon	ABCB10	2.15859	2.17877e-10
chr10:103427643|103436193	hsa-FBXW4_0001	hsa_circ_0008362	hsa_circ_19957	hsa-circRNA9262-10	HSA_CIRCpedia_117	exon	FBXW4	2.15839	6.59988e-12
chr10:11643344|11643979	hsa-USP6NL_0022	hsa_circ_0006664	-	hsa-circRNA9047-9	-	intron	USP6NL	2.15624	2.17881e-09
chrX:154018229|154020560	hsa-MPP1_0004	hsa_circ_0001952	hsa_circ_29809	hsa-circRNA16301-13	HSA_CIRCpedia_65458	exon	MPP1	2.15618	1.66261e-10
chr11:34111726|34112225	hsa-CAPRIN1_0026	hsa_circ_0000288	hsa_circ_23790	hsa-circRNA1283-6	HSA_CIRCpedia_4173	exon	CAPRIN1	2.15605	9.93665e-12
chr19:30476130|30477324	hsa-URI1_0007	hsa_circ_0000921	hsa_circ_26869	hsa-circRNA3991-9	HSA_CIRCpedia_25404	exon	URI1	2.15421	4.44612e-10
chr6:36862280|36870210	hsa-C6orf89_0005	hsa_circ_0076198	-	hsa-circRNA6738-3	HSA_CIRCpedia_54891	exon	C6orf89	2.1537	2.87482e-10
chr4:160107794|160131735	hsa-RAPGEF2_0004	-	-	hsa-circRNA6159-15	HSA_CIRCpedia_47841	exon	RAPGEF2	2.15315	1.27988e-12
chr1:156303338|156304709	hsa-CCT3_0003	hsa_circ_0004680	hsa_circ_24592	hsa-circRNA8788-15	HSA_CIRCpedia_28316	exon	CCT3	2.15072	2.69561e-09
chr19:50285014|50285981	hsa-AP2A1_0001	hsa_circ_0003395	hsa_circ_15140	hsa-circRNA4216-2	HSA_CIRCpedia_26472	exon	AP2A1	2.15044	1.59935e-13
chr4:83867411|83900159	hsa-LIN54_0001	hsa_circ_0007676	hsa_circ_10708	hsa-circRNA14049-4	HSA_CIRCpedia_49326	exon	LIN54	2.14913	2.9952e-10
chr12:89860547|89866052	hsa-POC1B_0001	hsa_circ_0027702	hsa_circ_24569	hsa-circRNA10051-4	HSA_CIRCpedia_9730	exon	POC1B	2.14792	1.6677e-06
chr1:21091870|21100103	hsa-HP1BP3_0003	hsa_circ_0002238	hsa_circ_17097	hsa-circRNA8345-25	HSA_CIRCpedia_29772	exon	HP1BP3	2.14759	2.28601e-10
chr1:95606229|95616975	hsa-TMEM56_0008	-	-	-	-	exon	TLCD4	2.14733	2.61334e-09
chr19:47767860|47768203	hsa-CCDC9_0002	hsa_circ_0000944	hsa_circ_03870	hsa-circRNA4163-5	HSA_CIRCpedia_26286	exon	CCDC9	2.14547	1.11841e-10
chr3:167422630|167443261	hsa-PDCD10_0011	hsa_circ_0067865	-	hsa-circRNA13818-7	HSA_CIRCpedia_105924	exon	PDCD10	2.14457	3.03073e-11
chr2:99786013|99787892	hsa-MITD1_0001	hsa_circ_0001050	hsa_circ_00171	hsa-circRNA12651-3	HSA_CIRCpedia_42776	exon	MITD1	2.14294	6.54812e-09
chr11:61094251|61097546	hsa-DDB1_0008	hsa_circ_0003900	hsa_circ_18594	hsa-circRNA9506-9	HSA_CIRCpedia_4810	exon	DDB1	2.14182	1.49233e-08
chr11:61205097|61205585	hsa-SDHAF2_0001	hsa_circ_0000311	hsa_circ_32431	hsa-circRNA1348-8	HSA_CIRCpedia_4841	exon		2.14144	1.04932e-10
chr14:23395342|23396869	hsa-PRMT5_0001	hsa_circ_0002928	hsa_circ_29131	hsa-circRNA10381-11	HSA_CIRCpedia_11727	exon	PRMT5	2.13997	4.76209e-11
chr3:44986660|45000952	hsa-ZDHHC3_0001	hsa_circ_0065052	hsa_circ_24251	hsa-circRNA13503-4	HSA_CIRCpedia_45738	exon	ZDHHC3	2.1393	2.91477e-10
chr17:7849046|7849304	hsa-CNTROB_0001	hsa_circ_0008310	hsa_circ_09218	hsa-circRNA3231-4	HSA_CIRCpedia_22687	exon		2.13929	4.91934e-12
chr2:176844538|176860374	hsa-KIAA1715_0006	hsa_circ_0008624	hsa_circ_08560	hsa-circRNA12786-11	HSA_CIRCpedia_38714	exon	LNPK	2.13838	8.74664e-10
chr22:46189425|46202902	hsa-ATXN10_0026	-	-	hsa-circRNA5377-16	-	intron	ATXN10	2.13773	4.71643e-09
chr8:100479642|100494030	hsa-VPS13B_0067	hsa_circ_0002565	hsa_circ_06341	hsa-circRNA7522-90	HSA_CIRCpedia_59593	exon	VPS13B	2.13564	1.01658e-10
chr2:227702789|227779067	hsa-RHBDD1_0014	-	hsa_circ_05837	hsa-circRNA4829-6	HSA_CIRCpedia_39875	exon	RHBDD1	2.13564	1.14468e-10
chr14:73614503|73640415	hsa-PSEN1_0004	hsa_circ_0002564	hsa_circ_30926	hsa-circRNA2361-11	HSA_CIRCpedia_12977	exon	PSEN1	2.13559	3.00354e-12
chr7:17908030|17937069	hsa-SNX13_0007	hsa_circ_0004671	hsa_circ_03531	hsa-circRNA15046-38	HSA_CIRCpedia_57545	exon	SNX13	2.13463	3.50744e-08
chr9:115013209|115015068	hsa-PTBP3_0003	hsa_circ_0088072	hsa_circ_22679	hsa-circRNA15883-31	HSA_CIRCpedia_62335	exon	PTBP3	2.13228	1.85566e-12
chr3:195789453|195803993	hsa-TFRC_0016	hsa_circ_0068617	hsa_circ_25745	hsa-circRNA13887-14	HSA_CIRCpedia_45005	exon	TFRC	2.13209	9.03474e-10
chr1:47753223|47765824	hsa-STIL_0008	hsa_circ_0004280	hsa_circ_29913	hsa-circRNA8500-16	HSA_CIRCpedia_32188	exon	STIL	2.13117	1.817e-10
chr6:36869997|36870210	hsa-C6orf89_0006	hsa_circ_0004143	hsa_circ_20154	hsa-circRNA6738-1	HSA_CIRCpedia_54894	exon	C6orf89	2.12817	2.38051e-12
chr15:30766559|30776889	hsa-CTD-3092A11_0001	-	-	hsa-circRNA2501-3	-	exon		2.12714	7.65171e-10
chr6:10703638|10705077	hsa-PAK1IP1_0005	hsa_circ_0008053	hsa_circ_14720	hsa-circRNA6608-6	HSA_CIRCpedia_53207	exon	PAK1IP1	2.12608	5.40792e-09
chr10:115636280|115644139	hsa-NHLRC2_0002	-	hsa_circ_01519	hsa-circRNA1117-6	HSA_CIRCpedia_444	exon	NHLRC2	2.12434	5.72981e-11
chr14:35331250|35331528	hsa-BAZ1A_0002	hsa_circ_0006137	hsa_circ_29554	hsa-circRNA10424-14	HSA_CIRCpedia_12022	exon	BAZ1A	2.12339	1.79626e-06
chr2:61406116|61413632	hsa-AHSA2_0005	-	hsa_circ_07114	hsa-circRNA4453-4	HSA_CIRCpedia_41805	exon	AHSA2P	2.11911	1.29866e-08
chr6:111726673|111793343	hsa-REV3L_0002	hsa_circ_0077660	-	hsa-circRNA14877-12	HSA_CIRCpedia_53346	exon	REV3L	2.11881	9.09677e-12
chr3:183361268|183369064	hsa-KLHL24_0006	hsa_circ_0001367	hsa_circ_05947	hsa-circRNA5823-2	HSA_CIRCpedia_44615	exon	KLHL24	2.11775	4.89298e-11
chr13:30826068|30829752	hsa-KATNAL1_0025	-	-	-	-	intron	KATNAL1	2.11645	9.98959e-08
chr15:66030045|66031213	hsa-DENND4A_0032	hsa_circ_0035949	-	hsa-circRNA10790-7	HSA_CIRCpedia_15325	exon	DENND4A	2.11614	2.56746e-08
chr13:95768176|95822882	hsa-ABCC4_0007	-	hsa_circ_26440	hsa-circRNA10329-36	HSA_CIRCpedia_11213	exon	ABCC4	2.11486	1.99762e-11
chr18:29412047|29419420	hsa-TRAPPC8_0034	hsa_circ_0003805	hsa_circ_32569	hsa-circRNA11785-39	HSA_CIRCpedia_23632	exon	TRAPPC8	2.11405	3.0595e-11
chr13:28830429|28855516	hsa-PAN3_0005	hsa_circ_0029853	hsa_circ_18944	hsa-circRNA2090-54	HSA_CIRCpedia_10487	exon	PAN3	2.11363	8.68345e-11
chr3:57618992|57627474	hsa-DENND6A_0003	-	-	hsa-circRNA13606-13	HSA_CIRCpedia_46502	exon	DENND6A	2.11347	1.58155e-10
chr1:16044388|16047883	hsa-PLEKHM2_0001	hsa_circ_0000021	hsa_circ_27839	hsa-circRNA81-30	HSA_CIRCpedia_28440	exon	PLEKHM2	2.1133	5.83275e-14
chr9:111812563|111835718	hsa-TMEM245_0004	hsa_circ_0004010	hsa_circ_27384	hsa-circRNA15871-3	HSA_CIRCpedia_62167	exon	TMEM245	2.11318	2.05157e-09
chr8:52758221|52773806	hsa-PCMTD1_0001	-	-	hsa-circRNA15489-3	HSA_CIRCpedia_61336	exon	PCMTD1	2.11169	8.73641e-09
chr12:72020040|72022817	hsa-ZFC3H1_0010	hsa_circ_0008912	hsa_circ_04092	hsa-circRNA10028-23	HSA_CIRCpedia_9556	exon	ZFC3H1	2.11154	3.45994e-09
chr2:24778884|24807429	hsa-NCOA1_0053	-	-	-	-	exon	NCOA1	2.11094	8.84297e-14
chr10:50708584|50714058	hsa-ERCC6_0004	hsa_circ_0018331	hsa_circ_10737	hsa-circRNA9127-3	HSA_CIRCpedia_1756	exon	ERCC6	2.11047	2.53796e-08
chr4:154471225|154479520	hsa-KIAA0922_0005	hsa_circ_0071298	hsa_circ_18027	hsa-circRNA6148-3	HSA_CIRCpedia_47791	exon	TMEM131L	2.109	1.13382e-07
chrX:13684436|13686502	hsa-TCEANC_0002	hsa_circ_0002871	-	hsa-circRNA7938-1	HSA_CIRCpedia_65293	exon	TCEANC	2.10558	1.35151e-11
chr1:92798948|92846430	hsa-RPAP2_0007	hsa_circ_0000091	hsa_circ_03016	hsa-circRNA388-2	HSA_CIRCpedia_33163	exon	RPAP2	2.10344	1.17648e-08
chr1:8601273|8674745	hsa-RERE_0006	hsa_circ_0008501	hsa_circ_06796	hsa-circRNA8283-27	HSA_CIRCpedia_33040	exon	RERE	2.10339	2.699e-09
chr14:75576388|75577074	hsa-NEK9_0004	hsa_circ_0000557	hsa_circ_16241	hsa-circRNA10525-25	HSA_CIRCpedia_13106	exon	NEK9	2.10281	1.6787e-10
chr2:231940225|231951895	hsa-PSMD1_0005	hsa_circ_0001110	hsa_circ_24150	hsa-circRNA4837-24	HSA_CIRCpedia_39977	exon	PSMD1	2.0991	2.88405e-11
chr4:83852096|83867627	hsa-LIN54_0010	-	hsa_circ_10107	hsa-circRNA14049-5	HSA_CIRCpedia_49318	exon	LIN54	2.09653	5.31329e-09
chr14:73459851|73460065	hsa-ZFYVE1_0006	hsa_circ_0032491	hsa_circ_19351	hsa-circRNA10509-14	HSA_CIRCpedia_12959	exon	ZFYVE1	2.09641	1.32624e-10
chr1:229677984|229683448	hsa-ABCB10_0004	-	-	hsa-circRNA8981-17	HSA_CIRCpedia_110736	exon	ABCB10	2.09411	5.90238e-10
chr1:21415631|21437876	hsa-EIF4G3_0078	hsa_circ_0005735	hsa_circ_06731	hsa-circRNA8346-90	HSA_CIRCpedia_29969	exon	EIF4G3	2.09369	3.56671e-11
chr6:90556281|90566918	hsa-CASP8AP2_0001	hsa_circ_0001621	hsa_circ_22234	hsa-circRNA6836-3	HSA_CIRCpedia_55838	exon	CASP8AP2	2.09266	7.87585e-09
chr7:30590252|30601744	hsa-AC005154_0002	hsa_circ_0001693	hsa_circ_13523	hsa-circRNA15080-3	HSA_CIRCpedia_57830	exon	GARS-DT	2.09186	1.35235e-10
chr6:17675136|17676001	hsa-NUP153_0006	hsa_circ_0075740	hsa_circ_22127	hsa-circRNA14605-29	HSA_CIRCpedia_54498	exon	NUP153	2.09095	3.0399e-10
chrX:100381698|100403150	hsa-CENPI_0001	hsa_circ_0091244	-	hsa-circRNA8092-16	HSA_CIRCpedia_64917	exon	CENPI	2.09013	3.56671e-11
chr7:43679048|43680248	hsa-COA1_0003	hsa_circ_0001700	hsa_circ_16861	hsa-circRNA15112-3	HSA_CIRCpedia_58084	exon	COA1	2.08698	4.25415e-10
chr8:141595218|141595410	hsa-AGO2_0019	hsa_circ_0008113	hsa_circ_21457	hsa-circRNA15623-23	HSA_CIRCpedia_60192	exon	AGO2	2.08617	8.59669e-08
chr11:2997254|3000467	hsa-NAP1L4_0016	hsa_circ_0003834	hsa_circ_17667	hsa-circRNA9370-20	HSA_CIRCpedia_4065	exon	NAP1L4	2.08469	7.96528e-08
chr1:58971732|59002413	hsa-OMA1_0004	hsa_circ_0000072	hsa_circ_07816	hsa-circRNA8531-6	HSA_CIRCpedia_32523	exon	OMA1	2.08436	3.75434e-08
chrX:67738612|67741339	hsa-YIPF6_0003	hsa_circ_0090933	hsa_circ_09526	hsa-circRNA8048-7	HSA_CIRCpedia_66178	exon	YIPF6	2.08231	2.52535e-08
chr3:47466975|47470160	hsa-SCAP_0001	hsa_circ_0007291	hsa_circ_19380	hsa-circRNA13515-32	HSA_CIRCpedia_45871	exon	SCAP	2.08223	1.74595e-11
chr12:112743868|112750951	hsa-HECTD4_0059	-	-	hsa-circRNA10125-35	HSA_CIRCpedia_6866	exon	HECTD4	2.08144	1.98119e-10
chr7:103801520|103808973	hsa-ORC5_0003	hsa_circ_0081797	-	hsa-circRNA15264-15	HSA_CIRCpedia_56137	exon	ORC5	2.07978	1.16686e-09
chr11:120310838|120316173	hsa-ARHGEF12_0046	hsa_circ_0024626	hsa_circ_12059	hsa-circRNA1579-14	HSA_CIRCpedia_3492	exon	ARHGEF12	2.07748	3.84142e-11
chr6:3284086|3298452	hsa-SLC22A23_0002	hsa_circ_0075501	hsa_circ_00810	hsa-circRNA14579-3	HSA_CIRCpedia_54758	exon	SLC22A23	2.07609	2.70311e-08
chr15:65962117|65962526	hsa-DENND4A_0033	hsa_circ_0035929	hsa_circ_05716	hsa-circRNA10790-55	HSA_CIRCpedia_15303	exon	DENND4A	2.07359	1.05913e-10
chr4:38091553|38104778	hsa-TBC1D1_0019	hsa_circ_0001402	hsa_circ_29251	hsa-circRNA5953-22	HSA_CIRCpedia_48479	exon	TBC1D1	2.07115	1.91881e-10
chr5:151169884|151170623	hsa-G3BP1_0002	hsa_circ_0003967	hsa_circ_00548	hsa-circRNA6504-5	HSA_CIRCpedia_50853	exon	G3BP1	2.07078	1.77497e-10
chr3:155551257|155560408	hsa-SLC33A1_0002	hsa_circ_0067774	hsa_circ_04676	hsa-circRNA13802-5	HSA_CIRCpedia_44134	exon	SLC33A1	2.07005	3.46462e-11
chr1:203676137|203677232	hsa-ATP2B4_0006	hsa_circ_0007167	hsa_circ_06293	hsa-circRNA698-7	HSA_CIRCpedia_29562	exon	ATP2B4	2.06982	3.47593e-10
chr14:75136352|75138186	hsa-AREL1_0014	hsa_circ_0005030	hsa_circ_16681	hsa-circRNA10523-4	HSA_CIRCpedia_13052	exon	AREL1	2.06887	4.98731e-11
chr20:35695127|35696589	hsa-RBL1_0003	hsa_circ_0060238	hsa_circ_27030	hsa-circRNA13043-11	HSA_CIRCpedia_34085	exon	RBL1	2.06859	4.98824e-09
chr10:27047991|27059274	hsa-ABI1_0001	-	hsa_circ_23511	hsa-circRNA9083-3	HSA_CIRCpedia_1313	exon	ABI1	2.06798	3.09393e-12
chr22:21288067|21288532	hsa-CRKL_0001	hsa_circ_0001206	hsa_circ_05707	hsa-circRNA5230-2	HSA_CIRCpedia_36027	exon	CRKL	2.0661	3.89809e-10
chr1:28907072|28907741	hsa-SNHG12_0001	hsa_circ_0005174	hsa_circ_22413	hsa-circRNA8395-3	HSA_CIRCpedia_31235	exon	SNHG12	2.06463	1.86977e-09
chr20:47707279|47711500	hsa-CSE1L_0008	hsa_circ_0060762	hsa_circ_13589	hsa-circRNA5059-61	HSA_CIRCpedia_34605	exon	CSE1L	2.06456	1.18763e-10
chr7:24663285|24708279	hsa-MPP6_0005	hsa_circ_0001686	hsa_circ_18994	hsa-circRNA7013-28	HSA_CIRCpedia_57717	exon	MPP6	2.06249	1.45158e-09
chr6:64356432|64356700	hsa-PHF3_0006	hsa_circ_0008878	hsa_circ_19708	hsa-circRNA6797-4	HSA_CIRCpedia_55376	exon	PHF3	2.05922	2.19095e-11
chr14:73614503|73614814	hsa-PSEN1_0012	hsa_circ_0003848	hsa_circ_20536	hsa-circRNA2361-15	HSA_CIRCpedia_12975	exon	PSEN1	2.05748	5.23709e-10
chr1:29386934|29424447	hsa-EPB41_0023	-	-	hsa-circRNA173-27	HSA_CIRCpedia_31269	exon	EPB41	2.05693	3.81018e-09
chr1:40319642|40323089	hsa-TRIT1_0005	hsa_circ_0000057	hsa_circ_23610	hsa-circRNA8459-4	HSA_CIRCpedia_31796	exon	TRIT1	2.05516	9.17772e-09
chr5:61745754|61747760	hsa-IPO11_0001	hsa_circ_0007915	hsa_circ_03226	hsa-circRNA6282-15	HSA_CIRCpedia_52101	exon	IPO11	2.05146	2.46505e-09
chr13:76134889|76143643	hsa-RP11-29G8_0001	hsa_circ_0000494	hsa_circ_20314	hsa-circRNA2158-33	HSA_CIRCpedia_11076	exon	UCHL3	2.05129	4.18825e-11
chr8:141874411|141900868	hsa-PTK2_0007	hsa_circ_0002483	hsa_circ_23485	hsa-circRNA15624-107	HSA_CIRCpedia_60278	exon	PTK2	2.05118	1.95451e-10
chr11:16117542|16133472	hsa-SOX6_0010	-	-	-	-	intron	SOX6	2.04947	1.83979e-08
chr3:195785155|195785503	hsa-TFRC_0042	hsa_circ_0068609	-	hsa-circRNA13887-23	HSA_CIRCpedia_44999	exon	TFRC	2.04847	2.30118e-09
chr14:102368056|102372866	hsa-PPP2R5C_0028	hsa_circ_0003831	hsa_circ_11830	hsa-circRNA2436-14	HSA_CIRCpedia_11405	exon	PPP2R5C	2.04822	7.72434e-08
chr16:69189774|69201088	hsa-UTP4_0003	hsa_circ_0007018	hsa_circ_00131	hsa-circRNA3081-18	HSA_CIRCpedia_18361	exon	UTP4	2.04683	1.12095e-11
chr5:65284463|65310553	hsa-ERBIN_0003	hsa_circ_0001493	hsa_circ_14912	hsa-circRNA6289-13	HSA_CIRCpedia_52228	exon	ERBIN	2.04387	4.70719e-09
chr19:23316882|23318845	hsa-ZNF730_0001	hsa_circ_0008122	hsa_circ_07973	hsa-circRNA3981-1	HSA_CIRCpedia_25371	exon	ZNF730	2.04284	4.47685e-09
chr8:21932340|21933352	hsa-DMTN_0003	-	-	-	-	intron	DMTN	2.04213	1.0356e-09
chr8:131226802|131249240	hsa-ASAP1_0001	hsa_circ_0085611	-	hsa-circRNA15613-80	HSA_CIRCpedia_60092	exon	ASAP1	2.04185	1.42974e-08
chr12:112638442|112666615	hsa-HECTD4_0135	-	-	-	HSA_CIRCpedia_6814	exon	HECTD4	2.0417	1.94139e-08
chr5:72347176|72373320	hsa-FCHO2_0028	hsa_circ_0072963	-	hsa-circRNA6314-30	HSA_CIRCpedia_52509	exon	FCHO2	2.04149	7.53796e-12
chr14:51107468|51111732	hsa-SAV1_0001	hsa_circ_0007101	hsa_circ_10595	hsa-circRNA10451-8	HSA_CIRCpedia_12308	exon	SAV1	2.04079	1.42136e-12
chr3:195800801|195803993	hsa-TFRC_0012	hsa_circ_0068630	-	hsa-circRNA13887-22	HSA_CIRCpedia_45016	exon	TFRC	2.04075	1.23486e-09
chr4:71808540|71841003	hsa-MOB1B_0010	-	-	-	-	exon	MOB1B	2.03955	5.79216e-07
chr7:138951079|138957186	hsa-UBN2_0031	hsa_circ_0005594	hsa_circ_05814	hsa-circRNA7283-2	HSA_CIRCpedia_56961	exon	UBN2	2.03765	8.71895e-09
chr1:247319708|247323115	hsa-ZNF124_0005	-	-	hsa-circRNA9019-3	-	exon	ZNF124	2.0373	5.48544e-07
chr20:21346059|21349228	hsa-XRN2_0002	hsa_circ_0003298	hsa_circ_11126	hsa-circRNA4955-3	HSA_CIRCpedia_33510	exon	XRN2	2.03675	1.26765e-11
chr15:49528048|49531564	hsa-GALK2_0003	hsa_circ_0008488	hsa_circ_00554	hsa-circRNA2578-13	HSA_CIRCpedia_14613	exon	GALK2	2.03652	9.63932e-10
chr10:121275021|121286936	hsa-RGS10_0001	hsa_circ_0005516	hsa_circ_24238	hsa-circRNA9313-1	HSA_CIRCpedia_617	exon	RGS10	2.03553	1.79217e-09
chr17:74734364|74772623	hsa-MFSD11_0005	hsa_circ_0045834	-	hsa-circRNA3532-2	HSA_CIRCpedia_22480	exon	MFSD11	2.03464	7.45306e-09
chr10:103552596|103570071	hsa-MGEA5_0001	hsa_circ_0019607	hsa_circ_22458	hsa-circRNA9265-11	HSA_CIRCpedia_128	exon	OGA	2.03394	5.25331e-10
chr2:70406664|70409129	hsa-C2orf42_0012	hsa_circ_0055113	hsa_circ_30349	hsa-circRNA12544-7	HSA_CIRCpedia_42201	exon	C2orf42	2.03375	8.93347e-09
chr1:29313943|29323831	hsa-EPB41_0022	hsa_circ_0011168	hsa_circ_29106	hsa-circRNA173-9	HSA_CIRCpedia_31253	exon	EPB41	2.03357	1.03151e-08
chr14:52922042|52939705	hsa-TXNDC16_0055	-	-	-	HSA_CIRCpedia_181641	intron	TXNDC16	2.03297	2.17518e-12
chr3:195785155|195789810	hsa-TFRC_0041	-	-	-	HSA_CIRCpedia_374733	exon	TFRC	2.03218	6.3757e-08
chr2:202285140|202285429	hsa-TRAK2_0003	hsa_circ_0057761	-	hsa-circRNA12843-6	HSA_CIRCpedia_39162	exon	TRAK2	2.02925	9.38313e-11
chr6:84894905|84896341	hsa-CEP162_0038	hsa_circ_0077223	hsa_circ_10645	hsa-circRNA14824-10	HSA_CIRCpedia_55677	exon	CEP162	2.02838	1.07292e-09
chr4:89028336|89036210	hsa-ABCG2_0010	-	hsa_circ_14588	-	HSA_CIRCpedia_49551	exon	ABCG2	2.02756	4.12858e-10
chr6:49582400|49583484	hsa-RHAG_0003	hsa_circ_0076716	-	hsa-circRNA14778-4	HSA_CIRCpedia_55233	exon	RHAG	2.02673	6.88366e-11
chr14:50069088|50074839	hsa-LRR1_0001	-	hsa_circ_27841	hsa-circRNA2283-13	HSA_CIRCpedia_12194	exon	LRR1	2.02669	1.11185e-08
chr15:44907561|44912601	hsa-SPG11_0048	hsa_circ_0003784	hsa_circ_31843	hsa-circRNA10700-56	HSA_CIRCpedia_14558	exon	SPG11	2.02567	1.87566e-09
chr1:169947226|170001116	hsa-KIFAP3_0001	-	-	hsa-circRNA8842-4	-	exon	KIFAP3	2.02427	7.6328e-10
chr2:61722590|61726048	hsa-XPO1_0043	hsa_circ_0054886	hsa_circ_07990	hsa-circRNA12521-25	HSA_CIRCpedia_41937	exon	XPO1	2.02371	3.55797e-09
chr10:51582183|51585599	-	-	-	-	-	exon		2.0226	3.80086e-07
chr11:120276827|120302620	hsa-ARHGEF12_0010	hsa_circ_0024609	hsa_circ_06331	hsa-circRNA1579-26	HSA_CIRCpedia_3479	exon	ARHGEF12	2.02085	2.44125e-08
chr13:21742127|21742538	hsa-SKA3_0001	hsa_circ_0000467	hsa_circ_01662	hsa-circRNA10221-5	HSA_CIRCpedia_10339	exon	SKA3	2.01964	7.70055e-08
chr11:16205432|16362798	hsa-SOX6_0004	-	hsa_circ_27259	hsa-circRNA9424-3	HSA_CIRCpedia_3830	exon	SOX6	2.01597	2.33758e-13
chr5:139819704|139825560	hsa-ANKHD1-EIF4EBP3_0036	hsa_circ_0001540	hsa_circ_08650	hsa-circRNA6466-11	HSA_CIRCpedia_50504	exon	ANKHD1	2.01436	3.87444e-09
chr8:124035953|124042956	hsa-DERL1_0006	hsa_circ_0085434	hsa_circ_04258	hsa-circRNA15596-5	HSA_CIRCpedia_59942	exon	DERL1	2.01429	7.90233e-10
chr1:207820662|207828620	hsa-CR1L_0008	-	-	-	-	intron	CR1L	2.01411	1.14428e-09
chr20:47782534|47790806	hsa-STAU1_0010	hsa_circ_0060778	-	hsa-circRNA13088-9	HSA_CIRCpedia_34622	exon	STAU1	2.01411	1.07448e-11
chr15:50878589|50884823	hsa-TRPM7_0007	-	-	hsa-circRNA10725-11	HSA_CIRCpedia_14660	exon	TRPM7	2.01382	3.9156e-12
chr15:50875286|50884823	hsa-TRPM7_0004	hsa_circ_0035228	hsa_circ_15635	hsa-circRNA10725-6	HSA_CIRCpedia_14659	exon	TRPM7	2.01059	3.7933e-09
chr19:21216262|21216990	hsa-ZNF430_0001	hsa_circ_0008838	hsa_circ_23546	hsa-circRNA3977-18	HSA_CIRCpedia_25332	exon		2.0077	9.89175e-07
chr3:167413384|167443261	hsa-PDCD10_0010	-	hsa_circ_24853	hsa-circRNA13818-1	HSA_CIRCpedia_44300	exon	PDCD10	2.00637	4.38599e-09
chr2:71582849|71607695	hsa-ZNF638_0008	hsa_circ_0055149	hsa_circ_05655	hsa-circRNA4487-27	HSA_CIRCpedia_42239	exon	ZNF638	2.00513	2.484e-06
chr5:133493398|133509713	hsa-SKP1_0004	hsa_circ_0004145	hsa_circ_10480	hsa-circRNA14417-10	-	exon	SKP1	2.00503	7.50629e-07
chr1:29313943|29314417	hsa-EPB41_0001	hsa_circ_0011167	hsa_circ_21075	hsa-circRNA173-7	HSA_CIRCpedia_31252	exon	EPB41	2.00328	9.61454e-06
chr11:73829273|73834180	hsa-C2CD3_0014	hsa_circ_0023555	hsa_circ_32456	hsa-circRNA9623-16	HSA_CIRCpedia_5580	exon	C2CD3	2.00314	1.17325e-08
chr2:120684174|120702816	hsa-PTPN4_0066	hsa_circ_0056248	hsa_circ_13069	hsa-circRNA4610-33	HSA_CIRCpedia_37672	exon	PTPN4	2.00141	2.52157e-09
chr2:211018219|211019335	hsa-KANSL1L_0001	hsa_circ_0008459	hsa_circ_10974	hsa-circRNA12864-2	HSA_CIRCpedia_39495	exon	KANSL1L	2.00106	2.98172e-10
chr8:11666303|11696082	hsa-FDFT1_0007	-	-	-	-	exon	FDFT1	2.00048	6.4726e-11
chr21:35138179|35140132	hsa-ITSN1_0011	-	hsa_circ_18474	hsa-circRNA5142-16	HSA_CIRCpedia_35336	exon	ITSN1	1.99982	8.87555e-09
chr17:65162594|65163912	hsa-HELZ_0006	hsa_circ_0045409	hsa_circ_26717	hsa-circRNA11626-32	HSA_CIRCpedia_22138	exon	HELZ	1.99982	6.76307e-11
chr7:104702611|104722244	hsa-KMT2E_0015	-	hsa_circ_00245	hsa-circRNA7213-13	HSA_CIRCpedia_56152	exon	KMT2E	1.99641	3.09535e-10
chr13:50025689|50042096	hsa-SETDB2_0004	hsa_circ_0030254	-	hsa-circRNA2135-11	HSA_CIRCpedia_10875	exon	SETDB2	1.9954	2.26038e-11
chr10:5836848|5842668	hsa-GDI2_0003	hsa_circ_0002665	hsa_circ_14735	hsa-circRNA9039-1	HSA_CIRCpedia_1864	exon	GDI2	1.99476	1.77792e-07
chr10:46135264|46159290	hsa-ZFAND4_0001	-	-	hsa-circRNA9116-1	HSA_CIRCpedia_1684	exon	ZFAND4	1.99413	1.10197e-09
chr11:111622883|111624301	hsa-PPP2R1B_0006	hsa_circ_0024271	hsa_circ_20577	hsa-circRNA9702-13	HSA_CIRCpedia_3235	exon	PPP2R1B	1.99248	1.32624e-10
chr1:173961893|173962273	hsa-RC3H1_0001	hsa_circ_0004927	-	hsa-circRNA8849-25	HSA_CIRCpedia_28838	exon	RC3H1	1.99226	1.60216e-07
chr2:113405230|113410375	hsa-SLC20A1_0003	-	hsa_circ_16834	hsa-circRNA4592-2	HSA_CIRCpedia_37569	exon	SLC20A1	1.99201	1.41087e-08
chr1:167921038|167944253	hsa-DCAF6_0001	hsa_circ_0000154	hsa_circ_26733	hsa-circRNA611-29	HSA_CIRCpedia_28587	exon	DCAF6	1.98943	3.15436e-08
chr11:47774468|47776216	hsa-FNBP4_0004	hsa_circ_0004075	hsa_circ_23759	hsa-circRNA9486-11	HSA_CIRCpedia_4644	exon	FNBP4	1.98758	7.67556e-11
chr10:27453993|27454468	hsa-MASTL_0005	hsa_circ_0000225	hsa_circ_02687	hsa-circRNA888-9	HSA_CIRCpedia_1356	exon	MASTL	1.98463	3.65353e-09
chr8:21832181|21846344	hsa-XPO7_0046	-	-	-	-	exon	XPO7	1.97815	3.29191e-09
chr12:116674626|116675510	hsa-MED13L_0040	hsa_circ_0008151	-	hsa-circRNA10134-41	-	intron	MED13L	1.97788	1.94317e-08
chr12:129299320|129299615	hsa-SLC15A4_0002	hsa_circ_0000462	hsa_circ_19009	hsa-circRNA10199-10	HSA_CIRCpedia_7639	exon	SLC15A4	1.97777	1.04034e-09
chr19:53883975|53888280	hsa-ZNF525_0002	-	-	-	-	exon	ZNF525	1.9774	2.85878e-09
chr10:15858834|15889942	hsa-FAM188A_0002	hsa_circ_0000219	hsa_circ_12109	hsa-circRNA9064-11	HSA_CIRCpedia_1117	exon	MINDY3	1.97669	2.17881e-09
chr5:64863340|64868113	hsa-PPWD1_0007	hsa_circ_0072697	hsa_circ_23538	hsa-circRNA6285-8	HSA_CIRCpedia_52200	exon	PPWD1	1.97373	7.97532e-09
chr1:1191425|1203372	hsa-UBE2J2_0001	hsa_circ_0009246	hsa_circ_16143	hsa-circRNA8243-12	HSA_CIRCpedia_27520	exon	UBE2J2	1.97328	3.07303e-11
chr8:21832181|21847918	hsa-XPO7_0041	hsa_circ_0083531	-	hsa-circRNA7370-16	HSA_CIRCpedia_154614	exon	XPO7	1.97208	1.87557e-08
chr1:115005726|115007010	hsa-TRIM33_0001	hsa_circ_0004127	hsa_circ_22658	hsa-circRNA8662-2	HSA_CIRCpedia_27423	exon	TRIM33	1.97166	1.96587e-07
chr5:145634506|145638156	hsa-RBM27_0006	hsa_circ_0006087	hsa_circ_16363	hsa-circRNA6486-34	HSA_CIRCpedia_50707	exon	RBM27	1.97128	1.99782e-08
chr17:47809642|47810082	hsa-FAM117A_0007	-	-	hsa-circRNA11552-6	-	exon	FAM117A	1.96788	5.22356e-09
chr7:44880498|44882953	hsa-H2AFV_0001	hsa_circ_0008791	hsa_circ_31126	hsa-circRNA15125-4	HSA_CIRCpedia_58145	exon	H2AZ2	1.96622	1.72767e-08
chr2:58425729|58459247	hsa-FANCL_0007	hsa_circ_0004435	hsa_circ_23488	hsa-circRNA12516-5	HSA_CIRCpedia_41768	exon	FANCL	1.96531	1.91762e-09
chr11:16117542|16122876	hsa-SOX6_0078	-	-	-	-	intron	SOX6	1.9643	2.86762e-10
chr9:99098999|99130587	hsa-SLC35D2_0008	-	-	-	HSA_CIRCpedia_111626	exon	SLC35D2	1.96248	1.43963e-09
chr12:94562929|94580249	hsa-PLXNC1_0001	-	hsa_circ_25381	hsa-circRNA1916-12	HSA_CIRCpedia_9798	exon	PLXNC1	1.96236	3.9776e-08
chr1:25775299|25783322	hsa-TMEM57_0009	hsa_circ_0010937	hsa_circ_19594	hsa-circRNA130-5	HSA_CIRCpedia_31081	exon	MACO1	1.96061	1.53269e-10
chr9:123199573|123210404	hsa-CDK5RAP2_0014	hsa_circ_0088281	hsa_circ_07113	hsa-circRNA15902-18	HSA_CIRCpedia_62500	exon	CDK5RAP2	1.9601	1.60076e-09
chr4:79780738|79786874	hsa-BMP2K_0006	hsa_circ_0070200	-	hsa-circRNA6037-17	HSA_CIRCpedia_49249	exon	BMP2K	1.95345	6.31083e-11
chr1:155640111|155649303	hsa-YY1AP1_0003	-	hsa_circ_32897	hsa-circRNA8779-71	HSA_CIRCpedia_28199	exon	YY1AP1	1.95269	1.06915e-08
chr16:47497810|47549512	hsa-PHKB_0037	hsa_circ_0000697	hsa_circ_24578	hsa-circRNA2989-50	HSA_CIRCpedia_17693	exon	PHKB	1.94746	6.84473e-11
chr3:195781951|195787118	hsa-TFRC_0035	-	hsa_circ_23469	hsa-circRNA13887-28	HSA_CIRCpedia_44998	exon	TFRC	1.94745	2.92219e-08
chr7:148529726|148544397	hsa-EZH2_0003	hsa_circ_0008324	hsa_circ_28315	hsa-circRNA15355-7	HSA_CIRCpedia_57172	exon	EZH2	1.93921	2.45999e-10
chr1:229665946|229678118	hsa-ABCB10_0009	hsa_circ_0008717	hsa_circ_26142	hsa-circRNA8981-16	HSA_CIRCpedia_30446	exon	ABCB10	1.93835	2.60853e-10
chr12:97303530|97306595	hsa-NEDD1_0002	hsa_circ_0027819	hsa_circ_11534	hsa-circRNA1924-8	HSA_CIRCpedia_9902	exon	NEDD1	1.93811	1.34849e-11
chr2:24021008|24056948	hsa-ATAD2B_0032	hsa_circ_0052943	hsa_circ_21789	hsa-circRNA12422-2	HSA_CIRCpedia_40220	exon	ATAD2B	1.93636	4.00118e-10
chr1:91967211|91989666	hsa-CDC7_0001	-	-	-	-	exon	CDC7	1.93468	1.76658e-10
chr15:66828271|66839043	hsa-ZWILCH_0008	hsa_circ_0008168	hsa_circ_02238	hsa-circRNA2623-7	HSA_CIRCpedia_15373	exon	ZWILCH	1.93365	2.30032e-10
chr1:168007609|168037701	hsa-DCAF6_0007	hsa_circ_0015132	-	hsa-circRNA611-32	HSA_CIRCpedia_28606	exon	DCAF6	1.93215	2.84966e-05
chr9:110062422|110074018	hsa-RAD23B_0001	hsa_circ_0008812	hsa_circ_22142	hsa-circRNA7761-16	HSA_CIRCpedia_62130	exon	RAD23B	1.93018	8.32243e-11
chr22:30218324|30228331	hsa-ASCC2_0003	hsa_circ_0062802	-	hsa-circRNA13295-31	HSA_CIRCpedia_36332	exon	ASCC2	1.92684	5.7213e-08
chr2:128520636|128528578	hsa-WDR33_0001	hsa_circ_0003192	hsa_circ_15506	hsa-circRNA12698-8	HSA_CIRCpedia_37787	exon	WDR33	1.92604	1.00022e-08
chr3:43341246|43345284	hsa-SNRK_0001	hsa_circ_0004089	hsa_circ_12022	hsa-circRNA5528-2	HSA_CIRCpedia_45671	exon	SNRK	1.92428	5.85774e-08
chr11:68334482|68343511	hsa-PPP6R3_0072	hsa_circ_0002038	hsa_circ_03032	hsa-circRNA1458-16	HSA_CIRCpedia_5324	exon	PPP6R3	1.92012	6.8054e-10
chr16:89484692|89497734	hsa-ANKRD11_0008	hsa_circ_0000727	hsa_circ_26017	hsa-circRNA11238-10	HSA_CIRCpedia_19109	exon	ANKRD11	1.91985	4.83307e-07
chr8:124346118|124350061	hsa-ATAD2_0014	hsa_circ_0085459	-	hsa-circRNA15598-20	HSA_CIRCpedia_59973	exon	ATAD2	1.91942	9.19569e-08
chr7:23015829|23023664	hsa-FAM126A_0007	hsa_circ_0001971	hsa_circ_21056	hsa-circRNA15057-3	HSA_CIRCpedia_57632	exon	FAM126A	1.91766	6.75388e-10
chr1:155891166|155891709	hsa-KIAA0907_0001	hsa_circ_0008998	hsa_circ_23951	hsa-circRNA8782-18	HSA_CIRCpedia_28261	exon	KHDC4	1.91693	1.24676e-08
chr12:112676856|112677831	hsa-HECTD4_0008	-	hsa_circ_30946	hsa-circRNA10125-68	HSA_CIRCpedia_6839	exon	HECTD4	1.91665	5.97549e-11
chr22:38890635|38897285	hsa-DDX17_0014	hsa_circ_0002211	hsa_circ_20417	hsa-circRNA13344-18	HSA_CIRCpedia_36679	exon	DDX17	1.91006	2.28123e-08
chr10:43650345|43654379	hsa-CSGALNACT2_0003	hsa_circ_0000236	hsa_circ_25052	hsa-circRNA916-8	HSA_CIRCpedia_1661	exon	CSGALNACT2	1.90972	3.60313e-09
chr17:29170931|29171934	hsa-ATAD5_0014	hsa_circ_0042867	hsa_circ_00868	hsa-circRNA3310-28	HSA_CIRCpedia_20041	exon	ATAD5	1.90943	3.19251e-10
chr21:16386665|16415895	hsa-NRIP1_0002	hsa_circ_0004771	hsa_circ_09184	hsa-circRNA13149-3	HSA_CIRCpedia_35058	exon	NRIP1	1.90883	4.38599e-09
chr12:50821545|50835426	hsa-LARP4_0003	hsa_circ_0026228	-	hsa-circRNA1767-23	HSA_CIRCpedia_8681	exon	LARP4	1.90831	1.90494e-08
chr18:196637|204692	hsa-USP14_0009	hsa_circ_0005653	hsa_circ_14485	hsa-circRNA3584-7	HSA_CIRCpedia_23372	exon	USP14	1.90654	5.68758e-06
chr1:180793889|180794480	hsa-XPR1_0008	hsa_circ_0005909	hsa_circ_02503	hsa-circRNA648-15	HSA_CIRCpedia_29081	exon	XPR1	1.89802	6.00704e-08
chr12:51442817|51451911	hsa-LETMD1_0001	hsa_circ_0006668	hsa_circ_07062	hsa-circRNA1770-4	HSA_CIRCpedia_8776	exon	LETMD1	1.88987	3.47715e-09
chr10:22002701|22016857	hsa-MLLT10_0021	hsa_circ_0007084	hsa_circ_17280	hsa-circRNA873-44	HSA_CIRCpedia_1219	exon	MLLT10	1.88759	5.97689e-09
chr14:92592466|92609638	hsa-CPSF2_0010	-	hsa_circ_12282	hsa-circRNA2410-21	HSA_CIRCpedia_13453	exon	CPSF2	1.88374	4.42658e-09
chr14:39746138|39748741	hsa-RP11-407N17_0004	hsa_circ_0000530	hsa_circ_00734	hsa-circRNA2273-5	HSA_CIRCpedia_12132	exon	MIA2	1.88255	2.33543e-07
chr12:111947353|111948386	hsa-ATXN2_0006	hsa_circ_0002601	hsa_circ_18636	hsa-circRNA10121-31	HSA_CIRCpedia_6683	exon	ATXN2	1.88241	1.01011e-07
chr2:172305191|172314585	hsa-DCAF17_0008	hsa_circ_0005904	hsa_circ_22698	hsa-circRNA4691-2	HSA_CIRCpedia_38596	exon	DCAF17	1.87842	2.29369e-08
chr12:27183667|27185614	hsa-MED21_0006	-	-	-	-	intron	MED21	1.87462	4.23292e-07
chr11:16205432|16256217	hsa-SOX6_0021	-	-	-	HSA_CIRCpedia_128165	exon	SOX6	1.86778	2.78625e-07
chr11:16119155|16133472	hsa-SOX6_0026	-	-	-	-	intron	SOX6	1.86396	4.21447e-08
chr1:15956820|15978390	hsa-DDI2_0005	hsa_circ_0010052	hsa_circ_28953	hsa-circRNA80-20	HSA_CIRCpedia_28389	exon	DDI2	1.86231	4.44723e-09
chr9:114840818|114842445	hsa-SUSD1_0039	hsa_circ_0088036	hsa_circ_18192	hsa-circRNA15882-24	HSA_CIRCpedia_62304	exon	SUSD1	1.85835	9.96923e-09
chr15:76566753|76588078	hsa-ETFA_0001	hsa_circ_0000638	hsa_circ_10388	hsa-circRNA10836-15	HSA_CIRCpedia_15745	exon	ETFA	1.85477	2.09536e-09
chr15:59204762|59209198	hsa-SLTM_0001	hsa_circ_0000605	hsa_circ_07014	hsa-circRNA10752-10	HSA_CIRCpedia_14911	exon	SLTM	1.85466	0.000785569
chr5:154330381|154346797	hsa-MRPL22_0002	-	-	hsa-circRNA6511-2	-	exon	MRPL22	1.85235	1.68461e-07
chr12:121002875|121004783	hsa-RNF10_0007	hsa_circ_0005086	hsa_circ_26444	hsa-circRNA2010-42	HSA_CIRCpedia_7145	exon	RNF10	1.85193	1.61328e-08
chr8:101287181|101300495	hsa-RNF19A_0001	hsa_circ_0085127	hsa_circ_25976	hsa-circRNA15562-2	HSA_CIRCpedia_59631	exon	RNF19A	1.83858	1.96186e-07
chr18:9524592|9525849	hsa-RALBP1_0007	hsa_circ_0005158	hsa_circ_07509	hsa-circRNA3602-1	HSA_CIRCpedia_24468	exon	RALBP1	1.83474	1.73525e-05
chr1:151060666|151090615	hsa-GABPB2_0011	-	-	hsa-circRNA506-4	-	exon	GABPB2	1.83357	4.30029e-08
chr17:45214518|45249430	hsa-CDC27_0017	-	hsa_circ_07409	hsa-circRNA11531-17	HSA_CIRCpedia_21126	exon	CDC27	1.83238	4.77127e-07
chr1:21377359|21437876	hsa-EIF4G3_0080	hsa_circ_0000026	hsa_circ_02549	hsa-circRNA8346-69	HSA_CIRCpedia_29966	exon	EIF4G3	1.83046	3.30044e-09
chr20:45891032|45912392	hsa-ZMYND8_0042	hsa_circ_0060611	hsa_circ_27205	hsa-circRNA13084-89	HSA_CIRCpedia_34428	exon	ZMYND8	1.82758	3.32506e-07
chr16:31373157|31374074	hsa-ITGAX_0001	hsa_circ_0039161	hsa_circ_23117	hsa-circRNA2979-10	HSA_CIRCpedia_17487	exon	ITGAX	1.82025	7.4887e-05
chr9:6420912|6421142	hsa-UHRF2_0006	hsa_circ_0086296	-	hsa-circRNA7618-28	HSA_CIRCpedia_64264	exon	UHRF2	1.81091	4.29116e-08
chr3:141811903|141820683	hsa-TFDP2_0010	hsa_circ_0008304	hsa_circ_26016	hsa-circRNA13770-3	HSA_CIRCpedia_43868	exon	TFDP2	1.81027	3.15436e-07
chr10:4872867|4884696	hsa-AKR1E2_0001	hsa_circ_0017521	hsa_circ_08900	hsa-circRNA834-14	HSA_CIRCpedia_1719	exon	AKR1E2	1.80321	8.30607e-06
chr3:185404845|185407415	hsa-IGF2BP2_0003	-	-	hsa-circRNA13861-21	HSA_CIRCpedia_44817	exon	IGF2BP2	1.79622	2.90879e-07
chr7:44714010|44714867	hsa-OGDH_0015	hsa_circ_0005004	hsa_circ_10009	hsa-circRNA7063-18	HSA_CIRCpedia_58136	exon	OGDH	1.79313	3.37933e-09
chr1:78177432|78181553	hsa-USP33_0016	hsa_circ_0005374	hsa_circ_27644	hsa-circRNA8568-25	HSA_CIRCpedia_32930	exon	USP33	1.78992	6.99802e-06
chr1:150202906|150204264	hsa-ANP32E_0005	hsa_circ_0004300	hsa_circ_23531	hsa-circRNA8707-1	HSA_CIRCpedia_27814	exon	ANP32E	1.78322	5.55e-07
chr20:17937577|17941969	hsa-SNX5_0014	hsa_circ_0009173	-	hsa-circRNA12997-25	HSA_CIRCpedia_33417	exon	SNX5	1.78273	1.95498e-09
chrX:149962164|149984551	hsa-CD99L2_0002	hsa_circ_0001948	hsa_circ_18892	hsa-circRNA16271-3	HSA_CIRCpedia_65353	exon	CD99L2	1.78091	1.55637e-08
chr2:20939731|20939965	hsa-LDAH_0004	hsa_circ_0052877	hsa_circ_04369	hsa-circRNA12420-1	HSA_CIRCpedia_39479	exon	LDAH	1.77991	1.47193e-08
chr5:137654908|137664218	hsa-CDC25C_0001	hsa_circ_0005537	hsa_circ_30120	hsa-circRNA14439-3	HSA_CIRCpedia_50380	exon	CDC25C	1.77919	1.27909e-06
chr14:102506573|102507010	hsa-DYNC1H1_0014	hsa_circ_0002398	hsa_circ_25823	hsa-circRNA2437-90	HSA_CIRCpedia_11444	exon	DYNC1H1	1.77153	1.2523e-06
chr7:17908030|17915413	hsa-SNX13_0006	hsa_circ_0005519	hsa_circ_09732	hsa-circRNA15046-29	HSA_CIRCpedia_57544	exon	SNX13	1.77147	5.29091e-06
chr3:100002451|100018175	hsa-TBC1D23_0008	hsa_circ_0066640	-	hsa-circRNA5648-3	HSA_CIRCpedia_42790	exon	TBC1D23	1.77064	0.00020043
chr5:31421379|31424578	hsa-DROSHA_0001	hsa_circ_0005524	hsa_circ_10678	hsa-circRNA14251-47	HSA_CIRCpedia_51518	exon	DROSHA	1.76739	1.12533e-06
chr9:114549073|114550227	hsa-C9orf84_0005	-	-	hsa-circRNA7769	-	intron	SHOC1	1.76567	9.95639e-08
chr5:93964516|93966448	hsa-SLF1_0011	hsa_circ_0073371	hsa_circ_12166	hsa-circRNA6361-12	HSA_CIRCpedia_53012	exon	SLF1	1.76552	2.18614e-07
chr3:66286968|66313803	hsa-SLC25A26_0002	hsa_circ_0003101	hsa_circ_13029	hsa-circRNA5615-5	HSA_CIRCpedia_46686	exon	SLC25A26	1.76109	0.000110218
chr16:29820861|29821085	hsa-MAZ_0001	-	hsa_circ_14304	-	HSA_CIRCpedia_17368	exon	MAZ	1.75954	4.32407e-06
chr16:11114050|11118778	hsa-CLEC16A_0008	hsa_circ_0006836	hsa_circ_04429	hsa-circRNA2854-10	HSA_CIRCpedia_16295	exon	CLEC16A	1.75201	4.3487e-09
chr6:49580110|49583484	hsa-RHAG_0004	hsa_circ_0076715	-	hsa-circRNA14778-7	HSA_CIRCpedia_55232	exon	RHAG	1.75165	4.14825e-08
chr1:54506429|54509198	hsa-TMEM59_0005	hsa_circ_0012634	hsa_circ_03779	hsa-circRNA8521-2	HSA_CIRCpedia_32469	exon	TMEM59	1.75084	1.26697e-06
chr8:100443765|100533238	hsa-VPS13B_0010	hsa_circ_0085086	hsa_circ_28120	hsa-circRNA7522-97	HSA_CIRCpedia_59587	exon	VPS13B	1.74769	4.51897e-08
chr1:182772833|182794955	hsa-NPL_0001	-	-	-	HSA_CIRCpedia_125240	exon	NPL	1.74632	9.44598e-08
chr7:152007051|152012423	hsa-KMT2C_0001	hsa_circ_0001769	hsa_circ_32798	hsa-circRNA15380-16	HSA_CIRCpedia_57295	exon	KMT2C	1.74626	2.28649e-06
chr1:94360170|94367225	hsa-GCLM_0001	hsa_circ_0003513	hsa_circ_10424	hsa-circRNA8609-4	HSA_CIRCpedia_33239	exon	GCLM	1.74216	5.92519e-06
chr10:930387|936769	hsa-LARP4B_0034	hsa_circ_0004995	-	hsa-circRNA9027-43	-	intron	LARP4B	1.74114	1.1193e-06
chr15:65266940|65275931	hsa-SPG21_0004	hsa_circ_0003526	hsa_circ_02894	hsa-circRNA10778-3	HSA_CIRCpedia_15208	exon	SPG21	1.73375	6.52055e-07
chr19:11289021|11289396	hsa-KANK2_0001	hsa_circ_0008554	hsa_circ_04421	hsa-circRNA11994-13	HSA_CIRCpedia_24735	exon		1.73201	3.65943e-07
chr12:112681157|112681813	hsa-HECTD4_0004	-	hsa_circ_20035	hsa-circRNA10125-89	HSA_CIRCpedia_6840	exon	HECTD4	1.72757	1.17201e-07
chrX:84322133|84329397	hsa-APOOL_0002	-	hsa_circ_21667	hsa-circRNA8083-2	HSA_CIRCpedia_66363	exon	APOOL	1.72677	1.54554e-07
chr4:160225494|160235920	hsa-RAPGEF2_0014	-	hsa_circ_26557	hsa-circRNA6159-4	HSA_CIRCpedia_47847	exon	RAPGEF2	1.71927	3.21615e-06
chr1:43239234|43241150	hsa-C1orf50_0001	hsa_circ_0004752	hsa_circ_13690	hsa-circRNA238-1	-	exon	C1orf50	1.71819	1.63354e-07
chr1:28362055|28384605	hsa-EYA3_0027	hsa_circ_0007895	hsa_circ_27653	hsa-circRNA8392-2	HSA_CIRCpedia_31200	exon	EYA3	1.71743	9.7094e-07
chr18:55226377|55247431	hsa-FECH_0010	hsa_circ_0047754	-	hsa-circRNA11818-2	-	exon	FECH	1.71734	6.7831e-06
chr3:179131200|179137293	hsa-GNB4_0004	hsa_circ_0001364	hsa_circ_23959	hsa-circRNA13838-7	HSA_CIRCpedia_44526	exon	GNB4	1.68655	4.91141e-07
chr1:167935867|167944253	hsa-DCAF6_0017	hsa_circ_0009109	hsa_circ_13037	hsa-circRNA611-5	HSA_CIRCpedia_28588	exon	DCAF6	1.68253	1.52112e-06
chr14:45715946|45716580	hsa-MIS18BP1_0008	-	-	hsa-circRNA10440-9	HSA_CIRCpedia_12191	exon	MIS18BP1	1.68183	4.63605e-07
chr13:28834584|28835595	hsa-PAN3_0026	hsa_circ_0029855	hsa_circ_25241	hsa-circRNA2090-16	HSA_CIRCpedia_10489	exon	PAN3	1.67563	6.05646e-06
chr15:68434284|68439038	hsa-PIAS1_0001	hsa_circ_0008378	hsa_circ_10500	hsa-circRNA2633-2	HSA_CIRCpedia_15419	exon	PIAS1	1.67395	4.56903e-06
chr1:227381487|227504947	hsa-CDC42BPA_0137	-	-	-	-	exon	CDC42BPA	1.67361	3.97712e-06
chr10:126097111|126097534	hsa-OAT_0001	hsa_circ_0002676	hsa_circ_20255	hsa-circRNA9325-2	HSA_CIRCpedia_67101	exon	OAT	1.66901	5.83993e-08
chr7:64004085|64004810	hsa-ZNF680_0001	hsa_circ_0002566	hsa_circ_29862	hsa-circRNA15148-4	HSA_CIRCpedia_58439	exon	ZNF680	1.66262	5.82896e-06
chr18:45391430|45396935	hsa-SMAD2_0001	hsa_circ_0003694	hsa_circ_16702	hsa-circRNA11803-1	HSA_CIRCpedia_23896	exon	SMAD2	1.65966	3.97712e-06
chr5:83356119|83362425	hsa-EDIL3_0001	hsa_circ_0073244	hsa_circ_13726	hsa-circRNA14351-3	HSA_CIRCpedia_52875	exon	EDIL3	1.65619	1.19786e-05
chr10:5815805|5842668	hsa-GDI2_0005	hsa_circ_0017586	hsa_circ_25394	hsa-circRNA9039-14	HSA_CIRCpedia_1857	exon	GDI2	1.65503	2.13008e-06
chr5:72370569|72378652	hsa-FCHO2_0026	hsa_circ_0072975	-	hsa-circRNA6314-5	HSA_CIRCpedia_52517	exon	FCHO2	1.65273	1.22009e-06
chr10:98303833|98336586	hsa-TM9SF3_0001	-	hsa_circ_11622	hsa-circRNA9236-19	HSA_CIRCpedia_2926	exon	TM9SF3	1.64956	2.596e-07
chr4:151719233|151738409	hsa-LRBA_0051	hsa_circ_0008618	hsa_circ_09338	hsa-circRNA14157-91	HSA_CIRCpedia_47690	exon	LRBA	1.64704	7.10291e-07
chr4:77045802|77065626	hsa-NUP54_0011	hsa_circ_0070033	hsa_circ_10364	hsa-circRNA14035-2	HSA_CIRCpedia_49129	exon	NUP54	1.64454	2.84933e-07
chr12:46230372|46233279	hsa-ARID2_0003	hsa_circ_0025951	hsa_circ_13578	hsa-circRNA1747-17	HSA_CIRCpedia_8467	exon	ARID2	1.64034	3.04845e-06
chr10:12123471|12162266	hsa-DHTKD1_0019	hsa_circ_0007813	hsa_circ_24773	hsa-circRNA851-55	HSA_CIRCpedia_609	exon	DHTKD1	1.63582	0.000564972
chr7:103828699|103844682	hsa-ORC5_0006	hsa_circ_0003000	hsa_circ_19088	hsa-circRNA15264-7	HSA_CIRCpedia_56142	exon	ORC5	1.6351	4.07416e-05
chr15:90414707|90432372	hsa-C15orf38-AP3S2_0002	hsa_circ_0009156	hsa_circ_03057	hsa-circRNA10889-3	HSA_CIRCpedia_16083	exon	AP3S2	1.63414	5.15473e-05
chr10:86177527|86185649	hsa-CCSER2_0002	hsa_circ_0006956	hsa_circ_08549	hsa-circRNA1010-11	HSA_CIRCpedia_2577	exon	CCSER2	1.63276	3.22121e-07
chr11:17358507|17359081	hsa-NUCB2_0016	-	-	hsa-circRNA1249	-	intron	NUCB2	1.63152	2.66597e-08
chr3:185638892|185639914	hsa-TRA2B_0015	hsa_circ_0006840	hsa_circ_16085	hsa-circRNA13862-13	HSA_CIRCpedia_44825	exon	TRA2B	1.62893	7.40302e-07
chr21:47783395|47787054	hsa-PCNT_0008	hsa_circ_0062097	-	hsa-circRNA5198-1	HSA_CIRCpedia_35774	exon	PCNT	1.62751	2.77982e-06
chr8:124357124|124360513	hsa-ATAD2_0017	hsa_circ_0085466	-	hsa-circRNA15598-16	HSA_CIRCpedia_59976	exon	ATAD2	1.62175	0.000270336
chr14:31596991|31602881	hsa-HECTD1_0050	hsa_circ_0002301	hsa_circ_00551	hsa-circRNA10415-83	HSA_CIRCpedia_11889	exon	HECTD1	1.61704	5.23547e-06
chr9:14639894|14680160	hsa-ZDHHC21_0003	hsa_circ_0008952	hsa_circ_11548	hsa-circRNA15692-1	HSA_CIRCpedia_63576	exon	ZDHHC21	1.60578	9.28711e-05
chr17:30267305|30293215	hsa-SUZ12_0002	hsa_circ_0042963	hsa_circ_10578	hsa-circRNA3310-20	HSA_CIRCpedia_20119	exon	SUZ12	1.6001	2.589e-05
chr2:172305191|172333460	hsa-DCAF17_0017	hsa_circ_0057051	hsa_circ_27980	hsa-circRNA4691-14	HSA_CIRCpedia_38600	exon	DCAF17	1.59626	0.000521604
chr11:33880989|33903433	hsa-LMO2_0001	-	-	-	-	exon	LMO2	1.59224	4.67405e-07
chr12:27132717|27143560	hsa-TM7SF3_0004	hsa_circ_0025705	hsa_circ_04491	hsa-circRNA9869-23	HSA_CIRCpedia_8095	exon	TM7SF3	1.58679	0.000138302
chr2:201721405|201722812	hsa-CLK1_0002	hsa_circ_0057725	hsa_circ_27295	hsa-circRNA12836-2	HSA_CIRCpedia_39112	exon	CLK1	1.58211	5.84186e-06
chr12:62715245|62749256	hsa-USP15_0003	hsa_circ_0027353	-	hsa-circRNA1847-7	HSA_CIRCpedia_127454	exon	USP15	1.58161	3.3316e-07
chrX:106331666|106332069	hsa-RBM41_0001	hsa_circ_0002995	hsa_circ_02302	hsa-circRNA16201-3	HSA_CIRCpedia_64969	exon	RBM41	1.57958	5.52012e-07
chr1:62907159|62907970	hsa-USP1_0004	-	hsa_circ_29585	hsa-circRNA322-6	HSA_CIRCpedia_32643	exon	USP1	1.56763	4.12089e-05
chr6:167435897|167447459	hsa-FGFR1OP_0002	hsa_circ_0004558	hsa_circ_24279	hsa-circRNA6958-6	HSA_CIRCpedia_54335	exon	FGFR1OP	1.56412	3.49946e-06
chr17:30267305|30267505	hsa-SUZ12_0013	hsa_circ_0042961	-	hsa-circRNA3310-58	HSA_CIRCpedia_20117	exon	SUZ12	1.56009	0.00128363
chr2:61505300|61508377	hsa-USP34_0070	hsa_circ_0007493	hsa_circ_12560	hsa-circRNA12520-140	HSA_CIRCpedia_41851	exon	USP34	1.55578	3.42233e-06
chr2:175945388|175986268	hsa-ATF2_0015	hsa_circ_0057144	hsa_circ_24540	hsa-circRNA12784-8	HSA_CIRCpedia_38692	exon	ATF2	1.55186	5.01089e-05
chr17:58013576|58013902	hsa-RPS6KB1_0030	hsa_circ_0044907	hsa_circ_31105	hsa-circRNA3465-9	HSA_CIRCpedia_21698	exon	RPS6KB1	1.55087	2.98237e-05
chr8:74585342|74601048	hsa-STAU2_0017	hsa_circ_0001811	hsa_circ_06205	hsa-circRNA15524-2	HSA_CIRCpedia_61667	exon	STAU2	1.54555	2.24024e-05
chr1:29319842|29344954	hsa-EPB41_0002	hsa_circ_0000041	hsa_circ_31017	hsa-circRNA173-15	HSA_CIRCpedia_31258	exon	EPB41	1.54144	8.25799e-06
chr3:182538048|182547540	hsa-ATP11B_0003	-	-	hsa-circRNA5821-4	HSA_CIRCpedia_41604	exon	ATP11B	1.53343	3.29127e-05
chr3:41265512|41268843	hsa-CTNNB1_0003	hsa_circ_0004194	hsa_circ_05331	hsa-circRNA5521-12	HSA_CIRCpedia_45584	exon	CTNNB1	1.53333	6.77574e-07
chr17:45221249|45249430	hsa-CDC27_0037	hsa_circ_0044232	hsa_circ_26011	hsa-circRNA11531-31	HSA_CIRCpedia_21129	exon	CDC27	1.5331	1.75265e-06
chr16:11114050|11145498	hsa-CLEC16A_0002	hsa_circ_0002086	hsa_circ_31153	hsa-circRNA2854-29	HSA_CIRCpedia_16299	exon	CLEC16A	1.52977	1.46374e-05
chr3:127298583|127299006	hsa-TPRA1_0001	hsa_circ_0067163	-	hsa-circRNA13730-5	HSA_CIRCpedia_43432	exon	TPRA1	1.52957	6.75102e-05
chr5:43675613|43677908	hsa-NNT_0006	hsa_circ_0003832	hsa_circ_03439	hsa-circRNA6258-22	HSA_CIRCpedia_51884	exon	NNT	1.52941	0.00111336
chr15:93489051|93510743	hsa-CHD2_0062	-	hsa_circ_24030	hsa-circRNA2740-45	HSA_CIRCpedia_16198	exon	CHD2	1.52695	2.37774e-05
chr2:122514816|122519100	hsa-TSN_0003	hsa_circ_0002847	hsa_circ_10530	hsa-circRNA4616-4	HSA_CIRCpedia_37746	exon	TSN	1.51904	0.000300926
chr17:29061915|29096983	hsa-SUZ12P1_0005	-	-	hsa-circRNA3310-98	HSA_CIRCpedia_20026	exon	SUZ12P1	1.51896	2.25918e-05
chr11:45883611|45893784	hsa-CRY2_0002	hsa_circ_0000295	hsa_circ_00790	hsa-circRNA1308-2	HSA_CIRCpedia_4416	exon	CRY2	1.51845	0.00030965
chr4:88005275|88016121	hsa-AFF1_0002	-	-	hsa-circRNA6050-8	HSA_CIRCpedia_49495	exon	AFF1	1.51291	4.19331e-05
chr17:62817885|62818511	hsa-PLEKHM1P1_0001	hsa_circ_0045334	hsa_circ_03261	hsa-circRNA11616-10	HSA_CIRCpedia_22072	exon	PLEKHM1P1	1.51146	2.92807e-05
chr9:79829245|79842401	hsa-VPS13A_0023	hsa_circ_0087243	hsa_circ_02350	hsa-circRNA7697-54	HSA_CIRCpedia_64445	exon	VPS13A	1.50982	9.50895e-05
chr16:30495148|30495584	hsa-ITGAL_0002	hsa_circ_0000690	hsa_circ_06000	hsa-circRNA2957-28	HSA_CIRCpedia_17426	exon	ITGAL	1.50845	0.000612647
chrX:77268376|77275895	hsa-ATP7A_0038	hsa_circ_0091137	hsa_circ_02930	hsa-circRNA8080-6	HSA_CIRCpedia_66324	exon	ATP7A	1.50766	2.22089e-05
chr8:23423621|23425891	hsa-SLC25A37_0001	-	-	hsa-circRNA7389-1	HSA_CIRCpedia_60648	exon	SLC25A37	1.50629	0.000478919
chr12:7970427|7985410	hsa-SLC2A14_0001	-	-	hsa-circRNA9828-1	HSA_CIRCpedia_348931	exon	SLC2A14	1.50471	1.23532e-05
chr16:11063018|11076848	hsa-CLEC16A_0003	hsa_circ_0004179	hsa_circ_27174	hsa-circRNA2854-44	HSA_CIRCpedia_16289	exon	CLEC16A	1.4992	2.60386e-05
chr7:129760589|129762042	hsa-KLHDC10_0008	hsa_circ_0002190	hsa_circ_19324	hsa-circRNA7259-6	HSA_CIRCpedia_56682	exon	KLHDC10	1.49035	2.81428e-05
chr17:62289934|62291602	hsa-TEX2_0003	hsa_circ_0006479	hsa_circ_02610	hsa-circRNA11609-3	HSA_CIRCpedia_22011	exon	TEX2	1.48201	0.000150489
chr9:19070217|19096767	hsa-HAUS6_0019	-	hsa_circ_23553	hsa-circRNA15699-1	HSA_CIRCpedia_63643	exon	HAUS6	1.4782	1.39649e-05
chr3:56703728|56707753	hsa-FAM208A_0013	hsa_circ_0001316	hsa_circ_31152	hsa-circRNA13601-35	HSA_CIRCpedia_46466	exon	TASOR	1.4763	0.000432239
chr16:18851020|18853776	hsa-SMG1_0027	hsa_circ_0008216	hsa_circ_23363	hsa-circRNA11025-35	HSA_CIRCpedia_16758	exon	SMG1	1.47361	0.000278635
chr6:3284086|3287325	hsa-SLC22A23_0006	-	-	hsa-circRNA14579-2	HSA_CIRCpedia_54757	exon	SLC22A23	1.47314	0.000273059
chr1:28362055|28374937	hsa-EYA3_0001	hsa_circ_0008057	hsa_circ_19165	hsa-circRNA8392-23	HSA_CIRCpedia_31199	exon	EYA3	1.47286	0.000504464
chr12:89853415|89866052	hsa-POC1B_0005	-	hsa_circ_03366	hsa-circRNA10051-2	HSA_CIRCpedia_9725	exon	POC1B	1.471	0.0003857
chr12:51389412|51399219	hsa-SLC11A2_0006	-	-	-	HSA_CIRCpedia_71230	exon	SLC11A2	1.46809	1.88866e-05
chr8:21826994|21837714	hsa-XPO7_0007	hsa_circ_0083521	hsa_circ_03553	hsa-circRNA7370-46	HSA_CIRCpedia_60566	exon	XPO7	1.46723	9.22607e-05
chr2:24042617|24046439	hsa-ATAD2B_0014	hsa_circ_0004736	hsa_circ_01329	hsa-circRNA12422-10	HSA_CIRCpedia_40227	exon	ATAD2B	1.46512	9.68474e-05
chr11:16203703|16208501	hsa-SOX6_0056	-	-	-	-	intron	SOX6	1.46428	0.000462183
chr8:100515064|100523740	hsa-VPS13B_0122	-	hsa_circ_17487	hsa-circRNA7522-102	HSA_CIRCpedia_59598	exon	VPS13B	1.46211	7.92266e-06
chr4:128851838|128854248	hsa-MFSD8_0005	hsa_circ_0006901	hsa_circ_24719	hsa-circRNA14130-2	HSA_CIRCpedia_47380	exon	MFSD8	1.45923	5.65185e-05
chr10:13705453|13712528	hsa-FRMD4A_0016	hsa_circ_0017819	hsa_circ_09737	hsa-circRNA9055-29	HSA_CIRCpedia_1066	exon	FRMD4A	1.45907	0.000272211
chr4:79747191|79780841	hsa-BMP2K_0026	hsa_circ_0070191	-	hsa-circRNA6037-15	HSA_CIRCpedia_374909	exon	BMP2K	1.45867	0.000225549
chr14:71880665|71884913	hsa-SIPA1L1_0031	-	-	hsa-circRNA2355-1	HSA_CIRCpedia_12920	exon	SIPA1L1	1.4577	0.000458878
chr17:4186093|4210418	hsa-UBE2G1_0001	hsa_circ_0004805	hsa_circ_07118	hsa-circRNA11289-7	HSA_CIRCpedia_20947	exon	UBE2G1	1.45342	0.000291169
chr20:34302107|34313077	hsa-RBM39_0015	hsa_circ_0004870	hsa_circ_29754	hsa-circRNA13038-21	HSA_CIRCpedia_33957	exon	RBM39	1.45217	9.25817e-05
chr1:158644119|158644465	hsa-SPTA1_0002	-	hsa_circ_03340	-	-	exon	SPTA1	1.44717	3.30776e-05
chr7:111926928|111927129	hsa-ZNF277_0010	hsa_circ_0001739	hsa_circ_11155	hsa-circRNA7223-1	HSA_CIRCpedia_56340	exon	ZNF277	1.4471	0.000974933
chr2:233675954|233677201	hsa-GIGYF2_0038	hsa_circ_0003937	hsa_circ_09298	hsa-circRNA4845-7	HSA_CIRCpedia_40055	exon	GIGYF2	1.44424	3.62313e-05
chr11:46515158|46529920	hsa-AMBRA1_0001	hsa_circ_0007001	hsa_circ_22960	hsa-circRNA9468-27	HSA_CIRCpedia_4449	exon	AMBRA1	1.43313	0.00031758
chr7:128282271|128289036	hsa-intergenic_000016	hsa_circ_0082179	-	hsa-circRNA7245-5	HSA_CIRCpedia_56549	intergenic_region		1.43067	0.000236162
chr15:66007816|66025156	hsa-DENND4A_0005	-	-	hsa-circRNA10790-39	HSA_CIRCpedia_117434	exon	DENND4A	1.42771	0.000221497
chr8:124089351|124113247	hsa-TBC1D31_0008	-	hsa_circ_06656	hsa-circRNA7550-21	HSA_CIRCpedia_59947	exon	TBC1D31	1.42513	0.000271752
chr2:106761646|106782539	hsa-UXS1_0002	hsa_circ_0004029	hsa_circ_28956	hsa-circRNA12668-1	HSA_CIRCpedia_37349	exon	UXS1	1.42432	0.000790559
chr2:32339707|32341281	hsa-SPAST_0002	hsa_circ_0002795	hsa_circ_06598	hsa-circRNA4387-21	HSA_CIRCpedia_40750	exon	SPAST	1.4243	7.43872e-05
chr5:78915435|78919312	hsa-PAPD4_0001	hsa_circ_0001504	hsa_circ_11134	hsa-circRNA6339-5	HSA_CIRCpedia_52743	exon	TENT2	1.42353	1.94976e-05
chr14:50616726|50616948	hsa-SOS2_0052	hsa_circ_0007695	hsa_circ_00172	hsa-circRNA10446-32	HSA_CIRCpedia_12254	exon	SOS2	1.42331	1.65144e-05
chr1:111690264|111717585	hsa-CEPT1_0002	hsa_circ_0013497	hsa_circ_06385	hsa-circRNA446-4	HSA_CIRCpedia_109056	exon	CEPT1	1.4221	9.47718e-06
chr13:77700453|77703365	hsa-MYCBP2_0001	hsa_circ_0000495	-	hsa-circRNA10323-113	HSA_CIRCpedia_11108	exon	MYCBP2	1.42148	0.000521544
chr10:112723883|112724819	hsa-SHOC2_0003	hsa_circ_0000261	hsa_circ_05516	hsa-circRNA1108-15	HSA_CIRCpedia_391	exon	SHOC2	1.41995	0.00104587
chr2:15693550|15698758	hsa-NBAS_0019	hsa_circ_0005556	hsa_circ_15079	hsa-circRNA12412-5	HSA_CIRCpedia_38243	exon	NBAS	1.41357	2.2737e-05
chr9:33953283|33996331	hsa-UBAP2_0052	hsa_circ_0086720	hsa_circ_13404	hsa-circRNA15725-9	HSA_CIRCpedia_63931	exon	UBAP2	1.41194	0.0006434
chr13:50025689|50026045	hsa-SETDB2_0025	hsa_circ_0030253	hsa_circ_05466	hsa-circRNA2135-5	HSA_CIRCpedia_10873	exon	SETDB2	1.41181	1.76328e-05
chr1:1735858|1749314	hsa-GNB1_0018	hsa_circ_0009353	hsa_circ_16706	hsa-circRNA8255-10	HSA_CIRCpedia_28775	exon	GNB1	1.41101	0.000405179
chr10:12123471|12136270	hsa-DHTKD1_0004	hsa_circ_0004630	hsa_circ_13965	hsa-circRNA851-73	HSA_CIRCpedia_602	exon	DHTKD1	1.4102	0.000383091
chr2:170393737|170401345	hsa-FASTKD1_0004	hsa_circ_0056954	hsa_circ_06928	hsa-circRNA12767-21	HSA_CIRCpedia_38466	exon	FASTKD1	1.40858	0.000427263
chr9:3488776|3490345	hsa-RFX3_0065	-	-	hsa-circRNA15673-17	HSA_CIRCpedia_63983	exon	RFX3	1.40774	0.00070223
chr22:41521868|41527637	hsa-EP300_0007	-	hsa_circ_05680	hsa-circRNA5346-44	HSA_CIRCpedia_36802	exon	EP300	1.4072	0.000308615
chr8:21832181|21849485	hsa-XPO7_0038	-	-	-	HSA_CIRCpedia_170763	exon	XPO7	1.407	0.0005289
chr6:42641529|42652609	hsa-UBR2_0137	hsa_circ_0001604	hsa_circ_20104	hsa-circRNA6756-58	HSA_CIRCpedia_55014	exon	UBR2	1.40647	9.25922e-05
chr12:123052808|123061576	hsa-KNTC1_0008	-	hsa_circ_08768	hsa-circRNA2033-85	HSA_CIRCpedia_7348	exon	KNTC1	1.40629	0.000278999
chr13:50601343|50619368	hsa-DLEU2_0005	-	-	-	HSA_CIRCpedia_10899	intron	DLEU2	1.40624	0.000695963
chr6:159004986|159010814	hsa-TMEM181_0004	hsa_circ_0001663	hsa_circ_09277	hsa-circRNA6946-11	HSA_CIRCpedia_54188	exon	TMEM181	1.40604	7.48725e-05
chr2:97024783|97026448	hsa-NCAPH_0003	hsa_circ_0007532	hsa_circ_15372	hsa-circRNA4547-8	HSA_CIRCpedia_42689	exon	NCAPH	1.4018	0.000389019
chr17:4186093|4200109	hsa-UBE2G1_0003	hsa_circ_0003239	hsa_circ_00694	hsa-circRNA11289-8	HSA_CIRCpedia_20945	exon	UBE2G1	1.39792	0.000108733
chr2:191765290|191789319	hsa-GLS_0006	hsa_circ_0001085	hsa_circ_22382	hsa-circRNA4732-13	HSA_CIRCpedia_38924	exon	GLS	1.39473	0.000705873
chr19:11446123|11446459	hsa-RAB3D_0003	-	hsa_circ_04113	hsa-circRNA11996-5	HSA_CIRCpedia_24745	exon	RAB3D	1.39053	0.000108733
chr7:92921015|92926555	hsa-VPS50_0002	hsa_circ_0002620	hsa_circ_04979	hsa-circRNA7152-25	HSA_CIRCpedia_59330	exon	VPS50	1.38958	0.00022458
chr7:80275968|80305983	hsa-CD36_0010	-	-	-	-	exon	CD36	1.38834	0.00057002
chr6:90916288|90981660	hsa-BACH2_0009	hsa_circ_0001626	hsa_circ_06095	hsa-circRNA14839-4	HSA_CIRCpedia_55851	exon	BACH2	1.38738	0.000400071
chr4:4239554|4248070	hsa-TMEM128_0001	hsa_circ_0005963	hsa_circ_21396	hsa-circRNA13933-2	HSA_CIRCpedia_48677	exon	TMEM128	1.38614	0.000636416
chr2:111406811|111419418	hsa-BUB1_0004	hsa_circ_0056037	-	hsa-circRNA12677-52	HSA_CIRCpedia_37463	exon	BUB1	1.38533	0.000588291
chr14:104128453|104129264	hsa-RP11-73M18_0012	hsa_circ_0033496	hsa_circ_23289	hsa-circRNA2454-39	HSA_CIRCpedia_11543	exon	KLC1	1.38246	0.000194675
chr15:75215989|75219228	hsa-COX5A_0004	hsa_circ_0007840	hsa_circ_17820	hsa-circRNA10827-3	HSA_CIRCpedia_15663	exon	COX5A	1.38237	5.59741e-06
chrY:15447443|15448215	hsa-UTY_0002	-	-	-	HSA_CIRCpedia_94233	exon	UTY	1.38222	0.000248873
chr2:28974904|29022299	hsa-PPP1CB_0013	-	-	-	-	exon	PPP1CB	1.38139	0.000195971
chr17:60087911|60112969	hsa-MED13_0001	-	hsa_circ_22648	hsa-circRNA11597-37	HSA_CIRCpedia_21881	exon	MED13	1.38121	0.000648879
chr2:15601325|15601915	hsa-NBAS_0009	hsa_circ_0005533	hsa_circ_26112	hsa-circRNA12412-118	HSA_CIRCpedia_38222	exon	NBAS	1.37751	0.000340849
chr16:19627436|19659204	hsa-C16orf62_0088	hsa_circ_0006797	hsa_circ_20264	hsa-circRNA2880-27	HSA_CIRCpedia_16825	exon	VPS35L	1.37706	8.73634e-05
chr6:170162525|170168267	hsa-ERMARD_0003	hsa_circ_0004237	hsa_circ_10277	hsa-circRNA6963-8	HSA_CIRCpedia_54427	exon	ERMARD	1.37386	9.75596e-05
chr16:1859239|1873038	hsa-HAGH_0003	-	-	-	-	exon	HAGH	1.3738	0.000169257
chr16:53472928|53481018	hsa-RBL2_0019	hsa_circ_0000703	hsa_circ_05173	hsa-circRNA3001-11	HSA_CIRCpedia_17877	exon	RBL2	1.37015	0.000516106
chr12:88542065|88570096	hsa-TMTC3_0001	hsa_circ_0027689	hsa_circ_24134	hsa-circRNA1910-8	HSA_CIRCpedia_9708	exon	TMTC3	1.36993	0.000270566
chr6:42790534|42797910	hsa-GLTSCR1L_0003	hsa_circ_0076410	hsa_circ_14674	hsa-circRNA6757-4	HSA_CIRCpedia_55023	exon	BICRAL	1.36965	0.000749015
chr18:13037236|13040955	hsa-CEP192_0036	hsa_circ_0000832	hsa_circ_06872	hsa-circRNA3617-40	HSA_CIRCpedia_23225	exon		1.36798	9.93032e-05
chr2:203817282|203820481	hsa-CARF_0007	hsa_circ_0004919	hsa_circ_32335	hsa-circRNA4764-16	HSA_CIRCpedia_39239	exon	CARF	1.36771	0.000297159
chr20:43108625|43115346	hsa-TTPAL_0002	hsa_circ_0060480	-	hsa-circRNA5032-3	HSA_CIRCpedia_34303	exon	TTPAL	1.36634	0.000529764
chr9:131271155|131277918	hsa-GLE1_0001	hsa_circ_0002675	hsa_circ_02821	hsa-circRNA7828-15	HSA_CIRCpedia_62977	exon	GLE1	1.36569	4.47119e-05
chr10:75234677|75239275	hsa-PPP3CB_0002	-	hsa_circ_02960	hsa-circRNA9182-8	HSA_CIRCpedia_76330	exon	PPP3CB	1.36545	0.000942188
chr17:58756814|58786686	hsa-BCAS3_0054	hsa_circ_0007682	hsa_circ_17197	hsa-circRNA3467-46	HSA_CIRCpedia_21757	exon	BCAS3	1.36542	0.000842715
chr9:111868788|111870850	hsa-TMEM245_0014	hsa_circ_0087938	hsa_circ_02259	hsa-circRNA15871-40	HSA_CIRCpedia_62196	exon	TMEM245	1.36335	0.00269132
chr17:11958206|11999011	hsa-MAP2K4_0001	hsa_circ_0042091	hsa_circ_03614	hsa-circRNA3241-9	HSA_CIRCpedia_19259	exon	MAP2K4	1.36289	0.000629799
chr12:89860547|89891119	hsa-POC1B_0002	-	-	hsa-circRNA10051-10	HSA_CIRCpedia_9731	exon	POC1B	1.36089	0.000978269
chr19:7607447|7622170	hsa-PNPLA6_0003	hsa_circ_0048983	-	hsa-circRNA3821-5	HSA_CIRCpedia_26836	exon		1.35958	0.000187897
chr9:128112574|128118136	hsa-GAPVD1_0020	hsa_circ_0008280	hsa_circ_32029	hsa-circRNA7799-20	HSA_CIRCpedia_62827	exon	GAPVD1	1.35801	0.000479715
chr6:64356432|64390062	hsa-PHF3_0011	hsa_circ_0006861	hsa_circ_26787	hsa-circRNA6797-8	HSA_CIRCpedia_55377	exon	PHF3	1.35792	0.000192285
chr4:52729603|52765544	hsa-DCUN1D4_0003	hsa_circ_0069718	hsa_circ_25683	hsa-circRNA5987-17	HSA_CIRCpedia_48801	exon	DCUN1D4	1.35785	0.000308673
chr11:120335946|120338017	hsa-ARHGEF12_0047	-	hsa_circ_13958	hsa-circRNA1579-50	HSA_CIRCpedia_3504	exon	ARHGEF12	1.35443	0.000493612
chr5:132219032|132220811	hsa-AFF4_0005	hsa_circ_0007945	hsa_circ_17099	hsa-circRNA14411-17	HSA_CIRCpedia_50149	exon	AFF4	1.3539	6.9682e-05
chr5:38991051|39003724	hsa-RICTOR_0018	hsa_circ_0006157	hsa_circ_23280	hsa-circRNA14267-14	HSA_CIRCpedia_51816	exon	RICTOR	1.34981	0.000580194
chr18:55218547|55247431	hsa-FECH_0017	-	-	-	-	exon	FECH	1.34924	0.000791252
chr22:32883732|32891517	hsa-FBXO7_0011	-	-	hsa-circRNA5303-20	HSA_CIRCpedia_36506	exon	FBXO7	1.34606	0.000220361
chr1:10155519|10165802	hsa-UBE4B_0001	hsa_circ_0005199	hsa_circ_01701	hsa-circRNA53-14	HSA_CIRCpedia_27044	exon	UBE4B	1.34606	3.57838e-05
chr9:138824903|138832091	hsa-UBAC1_0008	-	-	-	-	intron	UBAC1	1.34585	0.000295707
chr22:41550999|41558783	hsa-EP300_0044	-	-	hsa-circRNA5346-9	HSA_CIRCpedia_36823	exon	EP300	1.34476	6.2572e-05
chr22:30374431|30394846	hsa-MTMR3_0033	hsa_circ_0009055	hsa_circ_13444	hsa-circRNA5285-14	HSA_CIRCpedia_36346	exon	MTMR3	1.34389	0.000118801
chr1:184675777|184681011	hsa-EDEM3_0008	hsa_circ_0006507	hsa_circ_09720	hsa-circRNA8867-17	HSA_CIRCpedia_29165	exon	EDEM3	1.34082	0.000533301
chr1:21329206|21437876	hsa-EIF4G3_0081	hsa_circ_0007227	hsa_circ_30936	hsa-circRNA8346-43	HSA_CIRCpedia_29949	exon	EIF4G3	1.33895	0.000108733
chr15:90760671|90763123	hsa-SEMA4B_0003	hsa_circ_0036763	hsa_circ_11221	hsa-circRNA2725-8	HSA_CIRCpedia_16095	exon	SEMA4B	1.33885	0.000464772
chr4:54265897|54294350	hsa-FIP1L1_0001	hsa_circ_0005912	hsa_circ_20635	hsa-circRNA5991-9	HSA_CIRCpedia_48826	exon	FIP1L1	1.33846	0.000444874
chr17:30689933|30695033	hsa-ZNF207_0011	hsa_circ_0005565	hsa_circ_12630	hsa-circRNA3314-1	HSA_CIRCpedia_20173	exon	ZNF207	1.33501	4.9391e-05
chrX:70775804|70777522	hsa-OGT_0003	hsa_circ_0091038	hsa_circ_02604	hsa-circRNA8069-33	HSA_CIRCpedia_66244	exon	OGT	1.33426	0.000220655
chr10:46028558|46028737	hsa-MARCH8_0013	-	-	-	HSA_CIRCpedia_1679	exon	MARCHF8	1.33138	0.000361038
chr10:52103252|52104105	hsa-SGMS1_0001	hsa_circ_0018400	hsa_circ_05750	hsa-circRNA9132-10	HSA_CIRCpedia_1809	exon	SGMS1	1.33113	0.000273784
chr20:47557736|47570327	hsa-ARFGEF2_0001	hsa_circ_0007141	hsa_circ_13023	hsa-circRNA5058-69	HSA_CIRCpedia_34518	exon	ARFGEF2	1.33089	0.000189336
chr15:64404772|64411053	hsa-SNX1_0001	hsa_circ_0003867	hsa_circ_09039	hsa-circRNA2610-4	HSA_CIRCpedia_15131	exon	SNX1	1.32846	0.000453293
chr3:183361268|183390272	hsa-KLHL24_0011	hsa_circ_0001368	hsa_circ_03428	hsa-circRNA5823-11	HSA_CIRCpedia_44617	exon	KLHL24	1.32465	0.000350954
chr1:169767998|169770112	hsa-C1orf112_0014	hsa_circ_0015169	-	hsa-circRNA617-16	HSA_CIRCpedia_28659	exon	C1orf112	1.32458	0.00207249
chr3:195796326|195803993	hsa-TFRC_0001	-	-	hsa-circRNA13887-54	HSA_CIRCpedia_350160	exon	TFRC	1.32385	0.0003857
chr1:59787208|59812070	hsa-FGGY_0011	hsa_circ_0000075	hsa_circ_00027	hsa-circRNA314-5	HSA_CIRCpedia_32553	exon	FGGY	1.32383	0.00136198
chr11:85694909|85742653	hsa-PICALM_0018	-	-	hsa-circRNA9655-24	HSA_CIRCpedia_66871	exon	PICALM	1.3168	0.000331082
chr5:179956275|179980471	hsa-CNOT6_0022	hsa_circ_0075357	-	hsa-circRNA6575-3	HSA_CIRCpedia_51453	exon	CNOT6	1.31655	0.000614577
chr7:27668990|27672064	hsa-HIBADH_0002	hsa_circ_0003958	hsa_circ_12985	hsa-circRNA15070-10	HSA_CIRCpedia_57773	exon	HIBADH	1.31647	0.000209259
chr15:25650608|25660989	hsa-UBE3A_0031	hsa_circ_0005147	-	hsa-circRNA10624-26	-	intron	SNHG14	1.31617	0.000408614
chr19:11230768|11231198	hsa-LDLR_0003	hsa_circ_0006877	hsa_circ_13080	hsa-circRNA3864-49	HSA_CIRCpedia_24716	exon	LDLR	1.31395	0.000396843
chr8:100443765|100494030	hsa-VPS13B_0011	hsa_circ_0005984	hsa_circ_19532	hsa-circRNA7522-79	HSA_CIRCpedia_59586	exon	VPS13B	1.31365	0.000369395
chr18:13099475|13103587	hsa-CEP192_0032	hsa_circ_0005863	hsa_circ_20402	hsa-circRNA3617-1	HSA_CIRCpedia_23248	exon		1.3136	0.000628203
chr9:86294690|86297981	hsa-UBQLN1_0020	hsa_circ_0001867	hsa_circ_29935	hsa-circRNA15802-19	HSA_CIRCpedia_64535	exon	UBQLN1	1.31339	0.000412853
chr11:102221077|102248773	hsa-BIRC2_0003	-	-	-	-	exon	BIRC2	1.31193	0.000217428
chr2:98165882|98166077	hsa-ANKRD36B_0003	-	-	-	HSA_CIRCpedia_358475	exon	ANKRD36B	1.31034	0.0111349
chr21:42598193|42629253	hsa-BACE2_0001	hsa_circ_0061774	hsa_circ_00693	hsa-circRNA5157-7	HSA_CIRCpedia_35571	exon	BACE2	1.30998	0.000259358
chr12:102107868|102114032	hsa-CHPT1_0002	hsa_circ_0027904	hsa_circ_28145	hsa-circRNA1938-1	HSA_CIRCpedia_6290	exon	CHPT1	1.30969	0.00102441
chr5:180668492|180669345	hsa-RACK1_0001	hsa_circ_0075402	hsa_circ_05243	hsa-circRNA14568-37	HSA_CIRCpedia_51479	exon	RACK1	1.30826	6.93029e-05
chr7:141336760|141349133	hsa-AGK_0011	hsa_circ_0002980	hsa_circ_04238	hsa-circRNA7290-9	HSA_CIRCpedia_57112	exon	AGK	1.30744	0.000729364
chr2:211296449|211341136	hsa-LANCL1_0004	-	-	-	-	exon	LANCL1	1.30672	0.000303979
chr8:21849379|21861541	hsa-XPO7_0009	hsa_circ_0083557	-	hsa-circRNA7370-84	HSA_CIRCpedia_60578	exon	XPO7	1.30664	0.000213605
chr1:229675203|229685331	hsa-ABCB10_0020	-	-	-	-	intron	ABCB10	1.30555	7.90095e-05
chr8:131199482|131370389	hsa-ASAP1_0032	-	-	-	HSA_CIRCpedia_89706	exon	ASAP1	1.30249	0.000127315
chr1:95609447|95626705	hsa-TMEM56_0004	-	-	-	-	intron	TLCD4	1.30183	0.0002547
chr1:33413823|33415375	hsa-RNF19B_0001	hsa_circ_0000048	hsa_circ_31977	hsa-circRNA8423-1	HSA_CIRCpedia_31473	exon	RNF19B	1.30141	0.000393755
chr12:111923075|111924628	hsa-ATXN2_0024	hsa_circ_0002273	hsa_circ_22544	hsa-circRNA10121-39	HSA_CIRCpedia_6678	exon	ATXN2	1.29986	0.000221209
chr10:16794538|16806509	hsa-RSU1_0001	hsa_circ_0017856	hsa_circ_21127	hsa-circRNA9065-4	HSA_CIRCpedia_1130	exon	RSU1	1.29871	0.000583906
chr13:41482295|41488241	hsa-SUGT1P3_0001	-	-	-	HSA_CIRCpedia_10684	exon	SUGT1P3	1.29842	0.000440201
chr12:62775271|62778083	hsa-USP15_0002	hsa_circ_0027358	-	hsa-circRNA1847-27	HSA_CIRCpedia_127457	exon	USP15	1.29716	0.00129034
chr13:51501543|51509135	hsa-RNASEH2B_0002	hsa_circ_0030286	hsa_circ_17536	hsa-circRNA2142-1	HSA_CIRCpedia_10910	exon	RNASEH2B	1.29494	0.000324717
chr2:136505837|136519481	hsa-UBXN4_0003	hsa_circ_0002981	hsa_circ_12388	hsa-circRNA4644-7	HSA_CIRCpedia_37984	exon	UBXN4	1.29402	0.000176912
chr11:120335946|120343836	hsa-ARHGEF12_0056	-	-	hsa-circRNA1579-38	HSA_CIRCpedia_3505	exon	ARHGEF12	1.29335	0.000167635
chr1:198247091|198266370	hsa-NEK7_0001	hsa_circ_0006267	hsa_circ_01031	hsa-circRNA674-3	HSA_CIRCpedia_29388	exon	NEK7	1.29276	0.00070893
chr14:89628045|89629313	hsa-FOXN3_0016	hsa_circ_0000558	hsa_circ_27811	hsa-circRNA10551-3	-	exon	FOXN3	1.2911	0.00195756
chr22:30852389|30853512	hsa-SEC14L3_0001	-	-	-	-	intron	SEC14L3	1.28946	0.000411168
chr10:46121399|46122553	hsa-ZFAND4_0011	-	hsa_circ_22159	hsa-circRNA9116-3	HSA_CIRCpedia_1681	exon	ZFAND4	1.28738	0.00136433
chr15:64004974|64008672	hsa-HERC1_0014	hsa_circ_0035803	hsa_circ_15427	hsa-circRNA10768-173	HSA_CIRCpedia_15106	exon	HERC1	1.2861	0.000212847
chr17:18768782|18793190	hsa-PRPSAP2_0002	hsa_circ_0002307	hsa_circ_22667	hsa-circRNA3276-16	HSA_CIRCpedia_19601	exon	PRPSAP2	1.28523	0.000436227
chr9:5931544|5933881	hsa-KIAA2026_0025	-	-	-	-	intron	KIAA2026	1.2845	0.000285626
chr1:229665946|229685181	hsa-ABCB10_0008	-	hsa_circ_03801	hsa-circRNA8981-7	HSA_CIRCpedia_30448	exon	ABCB10	1.28365	0.000256235
chr10:112356156|112358048	hsa-SMC3_0001	hsa_circ_0000260	hsa_circ_30749	hsa-circRNA1104-10	HSA_CIRCpedia_375	exon	SMC3	1.2812	0.00489775
chr8:37971710|37993284	hsa-ASH2L_0026	hsa_circ_0008385	hsa_circ_10838	hsa-circRNA7420-15	HSA_CIRCpedia_60948	exon	ASH2L	1.2762	0.000312797
chr8:21826994|21835354	hsa-XPO7_0014	-	-	hsa-circRNA7370-43	HSA_CIRCpedia_60565	exon	XPO7	1.27512	0.000367741
chr9:86276692|86284242	hsa-UBQLN1_0015	hsa_circ_0007698	hsa_circ_05941	hsa-circRNA15802-12	-	exon	UBQLN1	1.27504	0.000275682
chr2:86968050|86980681	hsa-RMND5A_0001	-	-	hsa-circRNA4533-19	HSA_CIRCpedia_42532	exon	RMND5A	1.27438	0.000425008
chr12:112752261|112757546	hsa-HECTD4_0022	-	hsa_circ_17199	hsa-circRNA10125-51	HSA_CIRCpedia_6871	exon	HECTD4	1.27433	0.000341575
chr4:103644028|103647840	hsa-MANBA_0002	hsa_circ_0006007	hsa_circ_31852	hsa-circRNA14085-17	HSA_CIRCpedia_47003	exon	MANBA	1.27397	0.000390937
chr2:44683707|44776867	hsa-CAMKMT_0024	-	-	hsa-circRNA4424-2	-	exon	CAMKMT	1.27331	0.000158623
chr1:231672959|231678357	hsa-TSNAX-DISC1_0005	hsa_circ_0004834	hsa_circ_26123	hsa-circRNA794-5	HSA_CIRCpedia_30516	exon	TSNAX-DISC1	1.27152	0.000338966
chr3:100013931|100016889	hsa-TBC1D23_0050	hsa_circ_0005605	hsa_circ_26255	hsa-circRNA5648-19	HSA_CIRCpedia_42793	exon	TBC1D23	1.27039	0.000732522
chr1:8716032|8716500	hsa-RERE_0023	-	hsa_circ_12952	hsa-circRNA8283-30	HSA_CIRCpedia_33067	exon	RERE	1.26944	0.000557443
chr6:147527107|147560406	hsa-STXBP5_0036	hsa_circ_0078150	hsa_circ_28515	hsa-circRNA6924-31	HSA_CIRCpedia_53818	exon	STXBP5	1.26776	0.000863865
chr10:28872328|28884970	hsa-WAC_0001	hsa_circ_0007503	hsa_circ_26718	hsa-circRNA893-22	HSA_CIRCpedia_1399	exon	WAC	1.26677	0.00115924
chr2:176804280|176829261	hsa-KIAA1715_0029	-	-	-	-	exon	LNPK	1.2666	0.00051415
chr9:134888551|134889854	hsa-MED27_0004	hsa_circ_0006825	-	hsa-circRNA15963-1	-	intron	MED27	1.266	0.000820829
chr1:25666965|25669564	hsa-TMEM50A_0003	hsa_circ_0000032	hsa_circ_16811	hsa-circRNA129-7	HSA_CIRCpedia_31071	exon	TMEM50A	1.26559	0.000172543
chr4:6825912|6843931	hsa-KIAA0232_0001	hsa_circ_0069097	-	hsa-circRNA5915-3	HSA_CIRCpedia_48976	exon	KIAA0232	1.26419	0.000143588
chr1:207850734|207874963	hsa-CR1L_0018	-	-	-	-	exon	CR1L	1.26365	0.000418331
chr13:27649328|27690733	hsa-USP12_0002	-	-	-	HSA_CIRCpedia_118712	exon	USP12	1.26341	0.000524919
chr10:27420788|27425314	hsa-YME1L1_0001	hsa_circ_0005125	hsa_circ_16669	hsa-circRNA9085-23	HSA_CIRCpedia_1346	exon	YME1L1	1.2627	0.000253715
chr18:77488907|77496521	hsa-CTDP1_0004	hsa_circ_0008435	hsa_circ_11415	hsa-circRNA3719-6	HSA_CIRCpedia_24401	exon	CTDP1	1.25962	0.000102635
chr12:112638442|112642427	hsa-HECTD4_0021	-	hsa_circ_15095	hsa-circRNA10125-52	HSA_CIRCpedia_6813	exon	HECTD4	1.25832	0.000587427
chr14:60733933|60744083	hsa-PPM1A_0013	-	-	-	-	exon	PPM1A	1.25681	0.000417906
chr17:33951416|33954745	hsa-AP2B1_0020	hsa_circ_0043121	hsa_circ_05057	hsa-circRNA3320-10	HSA_CIRCpedia_20239	exon	AP2B1	1.2562	0.000846185
chr1:21091870|21107033	hsa-HP1BP3_0012	hsa_circ_0010445	-	hsa-circRNA8345-15	HSA_CIRCpedia_29774	exon	HP1BP3	1.25599	0.0025622
chr20:49232539|49236669	hsa-FAM65C_0006	-	-	hsa-circRNA13098	HSA_CIRCpedia_96136	exon	RIPOR3	1.25527	0.00100252
chr10:88230749|88233730	hsa-WAPL_0001	hsa_circ_0002727	hsa_circ_01278	hsa-circRNA9205-14	HSA_CIRCpedia_2610	exon	WAPL	1.24999	0.000383091
chr2:24786773|24807429	hsa-NCOA1_0095	hsa_circ_0000983	-	hsa-circRNA4353-27	-	intron	NCOA1	1.24875	0.00058635
chr8:26248759|26265892	hsa-BNIP3L_0001	hsa_circ_0002131	hsa_circ_13382	hsa-circRNA7395-4	HSA_CIRCpedia_60721	exon	BNIP3L	1.24546	0.000305464
chr12:68696400|68696652	hsa-MDM1_0003	hsa_circ_0027459	hsa_circ_32807	hsa-circRNA10023-2	HSA_CIRCpedia_9422	exon	MDM1	1.24514	0.000167019
chr10:88211724|88233730	hsa-WAPL_0014	hsa_circ_0019006	hsa_circ_06364	hsa-circRNA9205-3	HSA_CIRCpedia_2600	exon	WAPL	1.24469	0.000166769
chr16:28177829|28181230	hsa-XPO6_0027	hsa_circ_0008223	hsa_circ_25262	hsa-circRNA11050-58	HSA_CIRCpedia_17270	exon		1.2428	0.00078683
chr3:142116171|142123918	hsa-XRN1_0021	hsa_circ_0067619	hsa_circ_30173	hsa-circRNA13772-15	HSA_CIRCpedia_43893	exon	XRN1	1.2417	0.000608314
chrX:106390973|106396733	hsa-NUP62CL_0003	hsa_circ_0091288	hsa_circ_14186	hsa-circRNA16202-7	HSA_CIRCpedia_64970	exon	NUP62CL	1.24117	0.000683428
chr17:30320884|30321740	hsa-SUZ12_0012	hsa_circ_0042986	hsa_circ_16695	hsa-circRNA3310-19	HSA_CIRCpedia_20129	exon	SUZ12	1.24072	0.000359328
chr16:11114050|11220003	hsa-CLEC16A_0001	hsa_circ_0007846	hsa_circ_06520	hsa-circRNA2854-3	HSA_CIRCpedia_16301	exon	CLEC16A	1.24066	0.000144438
chr3:195794389|195803993	hsa-TFRC_0004	-	-	hsa-circRNA13887-57	HSA_CIRCpedia_45011	exon	TFRC	1.2377	0.000145994
chr4:178260937|178274882	hsa-NEIL3_0004	hsa_circ_0005365	hsa_circ_25278	hsa-circRNA6178-10	HSA_CIRCpedia_47988	exon	NEIL3	1.23736	0.000390659
chr18:46858234|46906128	hsa-DYM_0014	hsa_circ_0002501	hsa_circ_00156	hsa-circRNA11806-3	HSA_CIRCpedia_23932	exon	DYM	1.23468	0.000396561
chr15:68434284|68446033	hsa-PIAS1_0004	hsa_circ_0003916	hsa_circ_12357	hsa-circRNA2633-15	HSA_CIRCpedia_15420	exon	PIAS1	1.23429	4.4151e-05
chr1:25773253|25785383	hsa-TMEM57_0001	hsa_circ_0010935	hsa_circ_21755	hsa-circRNA130-3	HSA_CIRCpedia_31079	exon	MACO1	1.23356	0.000294905
chr6:109461624|109468140	hsa-CEP57L1_0007	-	-	-	-	exon	CEP57L1	1.23243	0.000799972
chr1:155365250|155429689	hsa-ASH1L_0002	hsa_circ_0014584	hsa_circ_15578	hsa-circRNA8777-17	HSA_CIRCpedia_28180	exon	ASH1L	1.23203	0.000712874
chr5:43675613|43704502	hsa-NNT_0012	hsa_circ_0005585	hsa_circ_26197	hsa-circRNA6258-29	-	exon	NNT	1.23002	0.000275802
chr19:11015627|11019883	hsa-CARM1_0001	hsa_circ_0004552	hsa_circ_05965	hsa-circRNA3862-1	HSA_CIRCpedia_24645	exon	CARM1	1.22873	0.000583326
chrX:131516206|131526362	hsa-MBNL3_0011	hsa_circ_0091570	-	hsa-circRNA16242-6	HSA_CIRCpedia_65240	exon	MBNL3	1.22783	0.000562516
chr17:74763468|74772623	hsa-MFSD11_0004	hsa_circ_0045842	hsa_circ_07122	hsa-circRNA3532-19	HSA_CIRCpedia_22493	exon	MFSD11	1.22747	0.000150503
chr3:56600622|56601081	hsa-CCDC66_0011	hsa_circ_0001312	hsa_circ_23200	hsa-circRNA5605-6	HSA_CIRCpedia_46445	exon	CCDC66	1.22732	0.000292602
chr2:169547544|169574488	hsa-CERS6_0001	hsa_circ_0007024	hsa_circ_29978	hsa-circRNA4675-1	HSA_CIRCpedia_38456	exon	CERS6	1.22583	0.000600705
chr9:6849507|6893232	hsa-KDM4C_0001	hsa_circ_0003124	hsa_circ_10371	hsa-circRNA7619-19	HSA_CIRCpedia_64303	exon	KDM4C	1.22464	0.000288234
chr19:19750894|19751380	hsa-GMIP_0001	hsa_circ_0000918	hsa_circ_17821	hsa-circRNA12113-5	HSA_CIRCpedia_25291	exon		1.2211	0.000361259
chr2:10784446|10808849	hsa-NOL10_0012	hsa_circ_0000977	hsa_circ_26285	hsa-circRNA12407-29	HSA_CIRCpedia_37367	exon	NOL10	1.22107	0.000540838
chr2:179400459|179407088	hsa-TTN-AS1_0001	hsa_circ_0004305	hsa_circ_27321	hsa-circRNA4710-8	HSA_CIRCpedia_38772	exon	TTN-AS1	1.22058	0.000203563
chr2:20507739|20527139	hsa-PUM2_0001	hsa_circ_0052867	hsa_circ_00164	hsa-circRNA12419-5	HSA_CIRCpedia_39357	exon	PUM2	1.21976	0.000406117
chr11:93429486|93433352	hsa-CEP295_0007	-	hsa_circ_02822	hsa-circRNA1510-22	HSA_CIRCpedia_6049	exon	CEP295	1.21762	0.000201828
chr11:73843889|73850873	hsa-C2CD3_0041	hsa_circ_0023559	hsa_circ_11502	hsa-circRNA9623-49	HSA_CIRCpedia_5585	exon	C2CD3	1.21706	0.000516106
chr3:195785155|195803993	hsa-TFRC_0007	-	-	hsa-circRNA13887-36	HSA_CIRCpedia_45003	exon	TFRC	1.21459	0.000245194
chr4:79747191|79808438	hsa-BMP2K_0024	-	-	-	HSA_CIRCpedia_49246	exon	BMP2K	1.21427	0.000415618
chr5:72347176|72364606	hsa-FCHO2_0013	hsa_circ_0008047	hsa_circ_16609	hsa-circRNA6314-8	HSA_CIRCpedia_52508	exon	FCHO2	1.21412	0.0002596
chr4:73984405|73991029	hsa-ANKRD17_0004	hsa_circ_0004148	hsa_circ_16503	hsa-circRNA14030-51	HSA_CIRCpedia_49069	exon	ANKRD17	1.21267	0.0107195
chr13:21305980|21306260	hsa-EEF1AKMT1_0001	hsa_circ_0003285	hsa_circ_04262	hsa-circRNA10218-3	HSA_CIRCpedia_10305	exon	EEF1AKMT1	1.21223	0.00102834
chr2:227702264|227779067	hsa-RHBDD1_0017	-	-	-	-	exon	RHBDD1	1.21214	0.00243802
chr2:20454624|20455931	hsa-PUM2_0021	hsa_circ_0005952	hsa_circ_12203	hsa-circRNA12419-9	HSA_CIRCpedia_39334	exon	PUM2	1.21049	0.000621829
chr6:79770195|79770535	hsa-PHIP_0007	hsa_circ_0003810	hsa_circ_10953	hsa-circRNA14811-60	HSA_CIRCpedia_55592	exon	PHIP	1.20798	0.000175082
chr9:33941647|33953472	hsa-UBAP2_0037	hsa_circ_0086709	-	hsa-circRNA15725-35	HSA_CIRCpedia_63911	exon	UBAP2	1.20739	0.000448736
chr14:32559708|32563592	hsa-ARHGAP5_0003	hsa_circ_0031583	hsa_circ_29011	hsa-circRNA2252-8	HSA_CIRCpedia_11981	exon	ARHGAP5	1.20726	0.000357975
chr7:127013396|127017383	hsa-ZNF800_0001	hsa_circ_0082096	hsa_circ_06855	hsa-circRNA15303-1	HSA_CIRCpedia_56479	exon	ZNF800	1.20645	0.00025904
chrX:47705504|47755339	hsa-ZNF81_0002	hsa_circ_0006364	hsa_circ_07868	hsa-circRNA8001-1	HSA_CIRCpedia_65956	exon	ZNF81	1.20523	0.000169105
chr1:172525009|172539870	hsa-SUCO_0023	-	hsa_circ_03242	hsa-circRNA623-16	HSA_CIRCpedia_28754	exon	SUCO	1.20442	0.000515889
chr6:161586609|161587449	hsa-AGPAT4_0008	-	hsa_circ_22132	hsa-circRNA14980-1	HSA_CIRCpedia_54279	exon	AGPAT4	1.20435	0.00771898
chr6:131520601|131540948	hsa-AKAP7_0030	-	-	hsa-circRNA6898	HSA_CIRCpedia_100165	exon	AKAP7	1.20403	0.000661717
chr10:7318854|7327916	hsa-SFMBT2_0003	hsa_circ_0000211	hsa_circ_20556	hsa-circRNA9043-29	HSA_CIRCpedia_2276	exon	SFMBT2	1.20328	0.000400415
chr2:230723488|230744844	hsa-TRIP12_0001	hsa_circ_0003273	hsa_circ_13401	hsa-circRNA12918-35	HSA_CIRCpedia_39961	exon	TRIP12	1.20267	0.000222727
chr4:1902353|1932497	hsa-WHSC1_0011	hsa_circ_0002688	hsa_circ_24449	hsa-circRNA5886-11	HSA_CIRCpedia_48163	exon	NSD2	1.20258	0.000271111
chr16:10513438|10567846	hsa-ATF7IP2_0020	-	-	-	-	exon	ATF7IP2	1.20165	0.000181552
chr3:47098311|47108608	hsa-SETD2_0002	hsa_circ_0002569	hsa_circ_06214	hsa-circRNA13512-28	HSA_CIRCpedia_45821	exon	SETD2	1.20144	0.000323279
chr3:195785155|195798369	hsa-TFRC_0037	-	-	-	HSA_CIRCpedia_165420	exon	TFRC	1.20141	0.000628203
chr16:21623966|21636436	hsa-METTL9_0001	hsa_circ_0002696	hsa_circ_00460	hsa-circRNA2893-3	HSA_CIRCpedia_16923	exon	METTL9	1.19984	6.05631e-05
chr12:46622936|46648719	hsa-SLC38A1_0011	hsa_circ_0000397	hsa_circ_19942	hsa-circRNA9900-10	HSA_CIRCpedia_8495	exon	SLC38A1	1.19897	0.000423519
chr10:51579128|51586411	-	-	-	-	-	exon		1.19833	0.000298685
chr15:85657104|85658718	hsa-PDE8A_0034	hsa_circ_0003856	hsa_circ_25503	hsa-circRNA2711-14	HSA_CIRCpedia_15960	exon	PDE8A	1.19787	0.00026973
chr17:80721841|80739597	hsa-TBCD_0012	hsa_circ_0000818	hsa_circ_30590	hsa-circRNA3581-98	HSA_CIRCpedia_22920	exon	TBCD	1.19634	0.00206611
chr7:32695599|32718742	hsa-DPY19L1P1_0003	-	hsa_circ_22373	hsa-circRNA15085-3	HSA_CIRCpedia_57887	exon	DPY19L1P1	1.19618	0.000174116
chr8:21832181|21842350	hsa-XPO7_0034	-	-	hsa-circRNA7370-17	HSA_CIRCpedia_60571	exon	XPO7	1.19025	0.000567634
chr8:124371461|124373886	hsa-ATAD2_0001	hsa_circ_0085473	hsa_circ_21168	hsa-circRNA15598-35	HSA_CIRCpedia_59984	exon	ATAD2	1.1898	0.000552021
chr2:27573181|27573499	hsa-GTF3C2_0009	-	-	-	-	exon	GTF3C2	1.18964	0.000577021
chr2:111423840|111431942	hsa-BUB1_0002	hsa_circ_0056040	hsa_circ_27601	hsa-circRNA12677-73	HSA_CIRCpedia_37467	exon	BUB1	1.1893	0.000144821
chr9:102722199|102722437	hsa-STX17_0007	hsa_circ_0001876	hsa_circ_08502	hsa-circRNA7748-2	HSA_CIRCpedia_62026	exon	STX17	1.1891	0.000456865
chr2:44617380|44628345	hsa-CAMKMT_0004	-	-	-	-	intron	CAMKMT	1.18782	0.00109751
chr10:32740520|32762951	hsa-CCDC7_0003	-	hsa_circ_21838	hsa-circRNA899-14	HSA_CIRCpedia_1512	exon	CCDC7	1.18515	0.000211975
chr5:60768508|60768864	hsa-ZSWIM6_0001	hsa_circ_0005399	hsa_circ_28273	hsa-circRNA6280-16	HSA_CIRCpedia_52063	exon	ZSWIM6	1.1848	0.00403855
chr10:76602358|76603236	hsa-KAT6B_0030	hsa_circ_0005235	hsa_circ_30620	hsa-circRNA993-11	HSA_CIRCpedia_2453	exon	KAT6B	1.18451	0.00381634
chr7:131058469|131084192	hsa-MKLN1_0068	hsa_circ_0003551	-	hsa-circRNA7264-47	-	intron	MKLN1	1.1845	0.000334085
chr10:103916776|103917971	hsa-NOLC1_0001	hsa_circ_0000257	hsa_circ_04802	hsa-circRNA1074-8	HSA_CIRCpedia_206	exon	NOLC1	1.18184	0.000208248
chr12:112657190|112666615	hsa-HECTD4_0024	-	-	hsa-circRNA10125-37	HSA_CIRCpedia_6828	exon	HECTD4	1.18139	0.000279161
chr15:41361768|41362745	hsa-INO80_0081	hsa_circ_0007489	hsa_circ_30048	hsa-circRNA10672-72	HSA_CIRCpedia_14180	exon	INO80	1.18121	0.000248873
chr20:42331130|42331543	hsa-MYBL2_0004	hsa_circ_0060461	hsa_circ_29431	hsa-circRNA5028-18	HSA_CIRCpedia_34288	exon	MYBL2	1.18121	0.000967668
chr8:62593527|62596747	hsa-AC090094_0001	hsa_circ_0084615	hsa_circ_10828	hsa-circRNA15506-36	HSA_CIRCpedia_61447	exon	ASPH	1.1807	0.000516565
chr1:15860732|15863309	hsa-DNAJC16_0001	hsa_circ_0000018	hsa_circ_07475	hsa-circRNA79-5	HSA_CIRCpedia_28367	exon	DNAJC16	1.17535	0.000535386
chr2:45773871|45780869	hsa-SRBD1_0003	hsa_circ_0005542	hsa_circ_32054	hsa-circRNA12491-16	HSA_CIRCpedia_41475	exon	SRBD1	1.17485	0.000723763
chr18:29691717|29693823	hsa-RNF138_0001	hsa_circ_0005729	hsa_circ_01057	hsa-circRNA3641-8	HSA_CIRCpedia_23678	exon	RNF138	1.17438	0.000127218
chr1:35824526|35827390	hsa-ZMYM4_0001	hsa_circ_0011536	hsa_circ_31531	hsa-circRNA199-12	HSA_CIRCpedia_31526	exon	ZMYM4	1.17409	0.000969108
chr2:109388157|109389502	hsa-RANBP2_0013	hsa_circ_0006965	hsa_circ_19920	hsa-circRNA4580-64	HSA_CIRCpedia_37414	exon	RANBP2	1.17322	0.00161283
chr3:9792629|9793633	hsa-OGG1_0001	hsa_circ_0008027	hsa_circ_31268	hsa-circRNA5418-4	HSA_CIRCpedia_46904	exon	OGG1	1.1721	0.000328928
chr4:71808540|71845008	hsa-MOB1B_0013	-	-	-	-	exon	MOB1B	1.1702	0.000704425
chr9:33948372|33963789	hsa-UBAP2_0053	hsa_circ_0004774	hsa_circ_01792	hsa-circRNA15725-75	HSA_CIRCpedia_63922	exon	UBAP2	1.16987	0.000456121
chr12:112696300|112702016	hsa-HECTD4_0070	-	-	hsa-circRNA10125-122	HSA_CIRCpedia_6846	exon	HECTD4	1.16835	0.000490485
chr2:48555700|48573890	hsa-FOXN2_0006	hsa_circ_0007641	hsa_circ_22181	hsa-circRNA4435-14	HSA_CIRCpedia_41569	exon	FOXN2	1.16789	0.000381319
chr7:16255691|16317851	hsa-ISPD_0016	-	hsa_circ_14510	hsa-circRNA15043-9	HSA_CIRCpedia_57496	exon	CRPPA	1.16776	0.000495254
chr14:103964839|103966537	hsa-MARK3_0044	-	-	hsa-circRNA2452-4	HSA_CIRCpedia_11535	exon	MARK3	1.16703	0.00186674
chr6:90461150|90472249	hsa-MDN1_0028	hsa_circ_0003814	hsa_circ_03500	hsa-circRNA14838-75	HSA_CIRCpedia_55816	exon	MDN1	1.16635	0.000517696
chr18:48584495|48586286	hsa-SMAD4_0008	hsa_circ_0047713	hsa_circ_00449	hsa-circRNA3677-5	HSA_CIRCpedia_23983	exon	SMAD4	1.16612	0.000897233
chr1:61577043|61624827	hsa-NFIA_0032	-	-	-	-	intron	NFIA	1.16597	0.000303066
chr15:91524114|91525211	hsa-PRC1_0006	hsa_circ_0036927	hsa_circ_23223	hsa-circRNA10893-1	HSA_CIRCpedia_16168	exon	PRC1	1.1649	0.00119171
chr15:90763025|90764997	hsa-SEMA4B_0002	hsa_circ_0036768	hsa_circ_12520	hsa-circRNA2725-9	HSA_CIRCpedia_16099	exon	SEMA4B	1.16452	0.000470073
chr1:207890809|207898053	hsa-CR1L_0007	-	-	hsa-circRNA721-4	HSA_CIRCpedia_29707	exon	CR1L	1.16375	7.21822e-05
chr9:36375931|36376124	hsa-RNF38_0006	hsa_circ_0001855	hsa_circ_12110	hsa-circRNA15750-14	HSA_CIRCpedia_64078	exon	RNF38	1.16349	0.00153166
chr7:5680785|5692141	hsa-RNF216_0001	hsa_circ_0079284	hsa_circ_07594	hsa-circRNA15022-28	HSA_CIRCpedia_58335	exon	RNF216	1.1624	0.000355655
chr10:98667022|98667504	hsa-LCOR_0001	hsa_circ_0007707	hsa_circ_22080	hsa-circRNA1046-10	HSA_CIRCpedia_2934	exon	LCOR	1.16224	0.00243144
chr6:34574332|34574681	hsa-C6orf106_0003	hsa_circ_0006757	hsa_circ_15580	hsa-circRNA14712-4	HSA_CIRCpedia_54794	exon	ILRUN	1.1618	0.000360121
chr6:42629922|42633983	hsa-UBR2_0081	-	hsa_circ_21059	hsa-circRNA6756-85	HSA_CIRCpedia_55008	exon	UBR2	1.16093	0.000304648
chr8:64098706|64100303	hsa-YTHDF3_0001	hsa_circ_0084620	hsa_circ_19767	hsa-circRNA7464-5	HSA_CIRCpedia_61455	exon	YTHDF3	1.15856	0.00058576
chr6:90461150|90463341	hsa-MDN1_0027	hsa_circ_0001619	hsa_circ_12378	hsa-circRNA14838-140	HSA_CIRCpedia_55815	exon	MDN1	1.15827	0.000425285
chr20:33315063|33324562	hsa-NCOA6_0001	hsa_circ_0004468	hsa_circ_16179	hsa-circRNA13026-1	HSA_CIRCpedia_33850	exon	NCOA6	1.15763	0.00189605
chr14:71867511|71884913	hsa-SIPA1L1_0032	hsa_circ_0002722	-	hsa-circRNA2355-36	HSA_CIRCpedia_12919	exon	SIPA1L1	1.15679	0.000484052
chr7:104702611|104707254	hsa-KMT2E_0001	hsa_circ_0081813	hsa_circ_17857	hsa-circRNA7213-33	HSA_CIRCpedia_56150	exon	KMT2E	1.15611	0.00130739
chr2:231305191|231314970	hsa-SP100_0005	-	-	hsa-circRNA4835-55	HSA_CIRCpedia_93834	exon	SP100	1.1554	0.000294905
chr11:76224430|76239510	hsa-EMSY_0004	hsa_circ_0008189	hsa_circ_18180	hsa-circRNA1494-2	HSA_CIRCpedia_5667	exon	EMSY	1.15301	0.000311974
chr2:208589524|208607066	hsa-CCNYL1_0001	hsa_circ_0002556	hsa_circ_10064	hsa-circRNA4778-9	HSA_CIRCpedia_39433	exon	CCNYL1	1.15282	0.00100688
chr2:160599572|160605414	hsa-MARCH7_0003	hsa_circ_0056841	hsa_circ_14554	hsa-circRNA4666-20	HSA_CIRCpedia_38358	exon	MARCHF7	1.14981	0.000492347
chr2:225400245|225422573	hsa-CUL3_0001	hsa_circ_0008309	hsa_circ_00391	hsa-circRNA12909-2	HSA_CIRCpedia_39862	exon	CUL3	1.14944	0.000853669
chr19:18684103|18684558	hsa-UBA52_0001	hsa_circ_0005568	hsa_circ_29953	hsa-circRNA3958-1	HSA_CIRCpedia_25194	exon	UBA52	1.14786	0.00054477
chr7:17885218|17890587	hsa-SNX13_0008	hsa_circ_0005535	hsa_circ_13045	hsa-circRNA15046-27	HSA_CIRCpedia_57538	exon	SNX13	1.14681	0.000519838
chr1:146747017|146757164	hsa-CHD1L_0011	hsa_circ_0013953	hsa_circ_12417	hsa-circRNA482-18	HSA_CIRCpedia_27778	exon	CHD1L	1.14658	0.00141697
chr18:9931807|9937063	hsa-VAPA_0001	hsa_circ_0006990	hsa_circ_26417	hsa-circRNA3606-6	HSA_CIRCpedia_24511	exon	VAPA	1.14316	0.00102441
chr8:21832181|21834032	hsa-XPO7_0002	hsa_circ_0083530	-	hsa-circRNA7370-71	HSA_CIRCpedia_60568	exon	XPO7	1.14315	0.000439179
chr4:103225474|103246155	hsa-SLC39A8_0006	-	-	hsa-circRNA14084-9	-	intron	SLC39A8	1.14261	0.00064079
chr7:140055468|140058585	hsa-SLC37A3_0005	hsa_circ_0004069	hsa_circ_02269	hsa-circRNA15344-4	HSA_CIRCpedia_57025	exon	SLC37A3	1.14236	0.000783128
chr2:24021008|24046439	hsa-ATAD2B_0001	hsa_circ_0052941	hsa_circ_25979	hsa-circRNA12422-28	HSA_CIRCpedia_40218	exon	ATAD2B	1.14123	0.00148563
chr7:102944289|102944937	hsa-PMPCB_0001	hsa_circ_0008540	hsa_circ_21954	hsa-circRNA7211-1	HSA_CIRCpedia_56099	exon	PMPCB	1.13873	0.000564286
chr1:65830318|65860715	hsa-DNAJC6_0003	-	hsa_circ_32707	hsa-circRNA332-12	HSA_CIRCpedia_32766	exon	DNAJC6	1.13652	0.000207669
chr20:43139930|43142681	hsa-SERINC3_0001	hsa_circ_0060491	hsa_circ_01627	hsa-circRNA13062-21	HSA_CIRCpedia_34319	exon	SERINC3	1.13355	0.000809438
chr2:32339707|32353548	hsa-SPAST_0030	hsa_circ_0053413	hsa_circ_19044	hsa-circRNA4387-13	HSA_CIRCpedia_40751	exon	SPAST	1.13326	0.000525122
chr9:33935837|33941860	hsa-UBAP2_0018	hsa_circ_0008344	hsa_circ_21221	hsa-circRNA15725-42	HSA_CIRCpedia_63904	exon	UBAP2	1.13284	0.00114176
chr19:34942886|34955036	hsa-UBA2_0009	hsa_circ_0008813	hsa_circ_01574	hsa-circRNA4014-73	HSA_CIRCpedia_25623	exon		1.13087	0.00160559
chr4:71816417|71824757	hsa-MOB1B_0008	-	hsa_circ_19903	hsa-circRNA6014-1	HSA_CIRCpedia_49029	exon	MOB1B	1.13035	0.000566451
chr2:45773871|45789895	hsa-SRBD1_0001	hsa_circ_0000997	hsa_circ_07720	hsa-circRNA12491-8	HSA_CIRCpedia_41476	exon	SRBD1	1.12997	0.000616762
chr11:86778736|86802437	hsa-TMEM135_0001	hsa_circ_0008359	hsa_circ_17807	hsa-circRNA1506-41	HSA_CIRCpedia_5930	exon	TMEM135	1.12911	0.00183199
chr3:169889161|169896726	hsa-PHC3_0008	hsa_circ_0005362	hsa_circ_29434	hsa-circRNA13823-7	HSA_CIRCpedia_44341	exon	PHC3	1.12884	0.00264698
chr10:111883775|111890244	hsa-ADD3_0005	hsa_circ_0003357	hsa_circ_05025	hsa-circRNA1101-18	HSA_CIRCpedia_367	exon	ADD3	1.12798	0.0009341
chr12:97303530|97313903	hsa-NEDD1_0001	-	hsa_circ_19770	hsa-circRNA1924-1	HSA_CIRCpedia_9903	exon	NEDD1	1.12723	0.000796383
chr4:154524455|154533552	hsa-KIAA0922_0031	hsa_circ_0001454	hsa_circ_27751	hsa-circRNA6148-15	HSA_CIRCpedia_47802	exon	TMEM131L	1.12642	0.000212847
chr1:213251038|213290752	hsa-RPS6KC1_0020	hsa_circ_0004849	hsa_circ_16353	hsa-circRNA738-12	HSA_CIRCpedia_29934	exon	RPS6KC1	1.126	0.00162442
chr2:215632206|215661841	hsa-BARD1_0004	hsa_circ_0058051	hsa_circ_09727	hsa-circRNA12871-18	HSA_CIRCpedia_39565	exon	BARD1	1.12589	0.000197148
chr10:119100491|119104960	hsa-PDZD8_0003	hsa_circ_0009114	-	hsa-circRNA9302-6	-	intron	PDZD8	1.12447	0.000876411
chr3:51575514|51586079	hsa-RAD54L2_0022	hsa_circ_0001306	-	hsa-circRNA5584-10	-	intron	RAD54L2	1.12429	0.000308528
chr12:22796697|22826594	hsa-ETNK1_0001	hsa_circ_0008664	hsa_circ_03502	hsa-circRNA1712-4	HSA_CIRCpedia_7981	exon	ETNK1	1.12381	0.000490451
chr20:2903853|2945848	hsa-PTPRA_0019	hsa_circ_0001126	hsa_circ_23772	hsa-circRNA4905-33	HSA_CIRCpedia_33586	exon	PTPRA	1.12354	0.000691859
chr15:64041566|64048947	hsa-HERC1_0176	hsa_circ_0035809	hsa_circ_30798	hsa-circRNA10768-197	HSA_CIRCpedia_156480	exon	HERC1	1.12185	0.00284536
chr2:40655613|40657444	hsa-SLC8A1_0015	hsa_circ_0000994	hsa_circ_10435	hsa-circRNA12478-3	HSA_CIRCpedia_41272	exon	SLC8A1	1.12078	0.0020431
chr11:3789811|3789974	hsa-NUP98_0074	hsa_circ_0020913	hsa_circ_07855	hsa-circRNA9376-102	HSA_CIRCpedia_4329	exon	NUP98	1.11859	0.00030224
chr20:47768119|47790806	hsa-STAU1_0005	-	-	hsa-circRNA13088-28	HSA_CIRCpedia_34619	exon	STAU1	1.11785	0.00092944
chr12:66597491|66622150	hsa-IRAK3_0001	hsa_circ_0005505	hsa_circ_17766	hsa-circRNA1864-3	HSA_CIRCpedia_9382	exon	IRAK3	1.1141	0.000185453
chr4:113483527|113511030	hsa-ZGRF1_0011	-	hsa_circ_01573	hsa-circRNA14109-19	HSA_CIRCpedia_47176	exon	ZGRF1	1.1141	0.000405708
chr7:138768526|138774505	hsa-ZC3HAV1_0001	hsa_circ_0082633	hsa_circ_03747	hsa-circRNA15339-11	HSA_CIRCpedia_56945	exon	ZC3HAV1	1.1129	0.000532983
chr1:207820263|207828620	hsa-CR1L_0006	-	-	-	-	intron	CR1L	1.11114	0.00258053
chr1:31465237|31468067	hsa-PUM1_0014	hsa_circ_0000043	hsa_circ_05044	hsa-circRNA8401-40	HSA_CIRCpedia_31329	exon	PUM1	1.10992	0.000924748
chr13:95822786|95840796	hsa-ABCC4_0014	hsa_circ_0030594	-	hsa-circRNA10329-22	HSA_CIRCpedia_11228	exon	ABCC4	1.10833	0.00141225
chr5:54570442|54577343	hsa-DHX29_0005	hsa_circ_0008935	hsa_circ_29870	hsa-circRNA14287-1	HSA_CIRCpedia_51941	exon	DHX29	1.10829	0.000425136
chr3:108324182|108335504	hsa-DZIP3_0023	hsa_circ_0066761	hsa_circ_10882	hsa-circRNA5663-13	HSA_CIRCpedia_42922	exon	DZIP3	1.10776	0.00099539
chr3:169831148|169840532	hsa-PHC3_0007	hsa_circ_0006893	hsa_circ_20633	hsa-circRNA13823-18	HSA_CIRCpedia_44319	exon	PHC3	1.10758	0.000562483
chr15:65471272|65472542	hsa-CLPX_0007	hsa_circ_0004374	hsa_circ_08041	hsa-circRNA10781-10	HSA_CIRCpedia_15224	exon	CLPX	1.10621	0.00141225
chr14:68228083|68229536	hsa-ZFYVE26_0003	hsa_circ_0000545	hsa_circ_03798	hsa-circRNA10499-26	HSA_CIRCpedia_12757	exon	ZFYVE26	1.1044	0.00114628
chr7:100410369|100410830	hsa-EPHB4_0003	hsa_circ_0001730	hsa_circ_08510	hsa-circRNA15247-14	HSA_CIRCpedia_56001	exon	EPHB4	1.10408	0.000238028
chr13:37614542|37625720	hsa-SUPT20H_0014	hsa_circ_0000475	hsa_circ_10136	hsa-circRNA10253-6	HSA_CIRCpedia_10653	exon	SUPT20H	1.10198	0.00301109
chr2:43805652|43818093	hsa-THADA_0035	hsa_circ_0054322	hsa_circ_22249	hsa-circRNA12483-50	HSA_CIRCpedia_41363	exon	THADA	1.10194	0.000312478
chr3:155545971|155560408	hsa-SLC33A1_0004	-	hsa_circ_02774	hsa-circRNA13802-8	HSA_CIRCpedia_44128	exon	SLC33A1	1.10162	0.00177834
chr3:119582266|119595355	hsa-GSK3B_0006	hsa_circ_0007986	hsa_circ_26957	hsa-circRNA13693-18	HSA_CIRCpedia_43089	exon	GSK3B	1.09983	0.000975856
chr8:21832181|21843202	hsa-XPO7_0037	-	-	hsa-circRNA7370-85	HSA_CIRCpedia_60572	exon	XPO7	1.09901	0.00023794
chr18:21644104|21663045	hsa-TTC39C_0001	hsa_circ_0047270	hsa_circ_09042	hsa-circRNA3632-14	HSA_CIRCpedia_23478	exon	TTC39C	1.09822	0.000514613
chr2:120677645|120692534	hsa-PTPN4_0032	hsa_circ_0056245	hsa_circ_06447	hsa-circRNA4610-47	HSA_CIRCpedia_37670	exon	PTPN4	1.09751	0.00170746
chr22:22142546|22160234	hsa-MAPK1_0004	-	-	-	-	exon	MAPK1	1.09648	0.0011477
chr1:15953164|15970145	hsa-DDI2_0001	hsa_circ_0010048	hsa_circ_01914	hsa-circRNA80-10	HSA_CIRCpedia_28384	exon	DDI2	1.09389	0.000204058
chr14:55847291|55848909	hsa-ATG14_0002	-	-	-	HSA_CIRCpedia_12461	exon	ATG14	1.09375	0.00049833
chr16:89824985|89828430	hsa-FANCA_0001	hsa_circ_0002766	hsa_circ_10733	hsa-circRNA11242-78	HSA_CIRCpedia_19165	exon	FANCA	1.09121	0.000453293
chr3:137928659|137942575	hsa-ARMC8_0005	hsa_circ_0007348	hsa_circ_15293	hsa-circRNA5749-7	HSA_CIRCpedia_43755	exon	ARMC8	1.09103	0.000359328
chr11:34107611|34107960	hsa-CAPRIN1_0005	hsa_circ_0021644	hsa_circ_26051	hsa-circRNA1283-2	HSA_CIRCpedia_4166	exon	CAPRIN1	1.09093	0.000312981
chr6:137015278|137019820	hsa-MAP3K5_0002	hsa_circ_0006856	hsa_circ_19121	hsa-circRNA14931-49	HSA_CIRCpedia_53682	exon	MAP3K5	1.08992	0.000360054
chr12:27199091|27219159	hsa-MED21_0001	-	-	hsa-circRNA1720	-	exon	MED21	1.0892	0.00769642
chr22:29682912|29683123	hsa-EWSR1_0006	hsa_circ_0008044	hsa_circ_22760	hsa-circRNA5280-3	HSA_CIRCpedia_36282	exon	EWSR1	1.0865	0.00163099
chr1:230798887|230810870	hsa-COG2_0003	hsa_circ_0016868	hsa_circ_22803	hsa-circRNA788-11	HSA_CIRCpedia_30488	exon	COG2	1.08617	0.000220361
chr1:27267948|27268309	hsa-NUDC_0005	hsa_circ_0003940	hsa_circ_32045	hsa-circRNA151-5	HSA_CIRCpedia_31145	exon	NUDC	1.08617	0.000766365
chr12:58339411|58347472	hsa-ATP23_0001	-	hsa_circ_16605	hsa-circRNA1845-1	HSA_CIRCpedia_9205	exon	ATP23	1.0825	0.000271752
chr5:109117097|109125228	hsa-MAN2A1_0014	hsa_circ_0004768	hsa_circ_26309	hsa-circRNA6380-15	HSA_CIRCpedia_49811	exon	MAN2A1	1.0819	0.000473825
chr6:170159934|170168267	hsa-ERMARD_0002	hsa_circ_0078762	hsa_circ_16759	hsa-circRNA6963-6	HSA_CIRCpedia_54426	exon	ERMARD	1.08158	0.00759105
chr8:21839242|21843202	hsa-XPO7_0022	-	-	-	-	exon	XPO7	1.08158	0.000255822
chr11:43852526|43861614	hsa-HSD17B12_0002	-	hsa_circ_15187	hsa-circRNA1300-7	HSA_CIRCpedia_4396	exon	HSD17B12	1.08141	0.00203566
chr12:48477374|48491907	hsa-SENP1_0012	hsa_circ_0006222	hsa_circ_07378	hsa-circRNA9910-21	HSA_CIRCpedia_8534	exon	SENP1	1.08133	0.000446745
chr14:76633006|76662315	hsa-GPATCH2L_0003	hsa_circ_0005252	hsa_circ_01910	hsa-circRNA2385-15	HSA_CIRCpedia_13160	exon	GPATCH2L	1.08102	0.00026676
chr18:55238624|55240597	hsa-FECH_0015	-	-	hsa-circRNA11818-10	HSA_CIRCpedia_24048	exon	FECH	1.07983	0.000578444
chr5:6623327|6625782	hsa-NSUN2_0002	hsa_circ_0007380	hsa_circ_06181	hsa-circRNA14234-27	HSA_CIRCpedia_52267	exon	NSUN2	1.07927	0.000735783
chr7:27668990|27689252	hsa-HIBADH_0001	hsa_circ_0006773	hsa_circ_04236	hsa-circRNA15070-7	HSA_CIRCpedia_57775	exon	HIBADH	1.07759	0.000484052
chr5:54941617|54960691	hsa-SLC38A9_0001	hsa_circ_0008731	hsa_circ_22157	hsa-circRNA14291-19	HSA_CIRCpedia_51979	exon	SLC38A9	1.07637	0.00243016
chr13:52992127|53001354	hsa-VPS36_0015	hsa_circ_0030342	-	hsa-circRNA10310-8	HSA_CIRCpedia_10977	exon	VPS36	1.07517	0.00049833
chr10:70246901|70253327	hsa-SLC25A16_0003	hsa_circ_0003459	hsa_circ_00282	hsa-circRNA9159-6	HSA_CIRCpedia_2078	exon	SLC25A16	1.07448	0.000246611
chr17:62248460|62265775	hsa-TEX2_0012	hsa_circ_0004913	hsa_circ_31354	hsa-circRNA11609-5	HSA_CIRCpedia_22007	exon	TEX2	1.07384	0.00445381
chr5:95242227|95268417	hsa-ELL2_0007	hsa_circ_0009176	-	hsa-circRNA14365-7	-	intron	ELL2	1.0734	0.000724134
chr12:62743002|62749256	hsa-USP15_0004	hsa_circ_0027355	-	hsa-circRNA1847-16	HSA_CIRCpedia_9242	exon	USP15	1.07295	0.000491486
chr9:20819795|20823114	hsa-FOCAD_0005	hsa_circ_0003295	hsa_circ_01434	hsa-circRNA7629-19	HSA_CIRCpedia_63730	exon	FOCAD	1.0706	0.000425901
chr6:53370190|53397564	hsa-GCLC_0028	-	-	-	-	intron	GCLC	1.07049	0.0125297
chr13:50642233|50649789	hsa-DLEU2_0002	hsa_circ_0030281	hsa_circ_31388	hsa-circRNA10297-6	HSA_CIRCpedia_10900	exon	DLEU2	1.07009	0.000684436
chr19:5604594|5604947	hsa-SAFB2_0001	hsa_circ_0000880	hsa_circ_23587	hsa-circRNA11925-9	HSA_CIRCpedia_26645	exon	SAFB2	1.06912	0.000237096
chr6:87925621|87928449	hsa-ZNF292_0001	hsa_circ_0004058	hsa_circ_24447	hsa-circRNA6825-9	HSA_CIRCpedia_55726	exon	ZNF292	1.06898	0.000721906
chr7:2269619|2270399	hsa-MAD1L1_0029	hsa_circ_0004343	hsa_circ_04046	hsa-circRNA15009-3	HSA_CIRCpedia_57622	exon	MAD1L1	1.06823	0.00540672
chr3:71090479|71102924	hsa-FOXP1_0001	hsa_circ_0008234	hsa_circ_11346	hsa-circRNA13639-9	HSA_CIRCpedia_46750	exon	FOXP1	1.06746	0.00274612
chr14:31097415|31122794	hsa-SCFD1_0004	hsa_circ_0031419	hsa_circ_00285	hsa-circRNA2247-32	HSA_CIRCpedia_11820	exon	SCFD1	1.06675	0.000603209
chr1:207850734|207851642	hsa-CR1L_0017	-	-	hsa-circRNA721-8	HSA_CIRCpedia_29700	exon	CR1L	1.0658	0.00283746
chr18:55833020|55919286	hsa-NEDD4L_0003	-	hsa_circ_31075	hsa-circRNA3687-13	HSA_CIRCpedia_24079	exon	NEDD4L	1.06446	0.00063073
chr10:105106995|105108756	hsa-PCGF6_0001	hsa_circ_0005052	hsa_circ_10302	hsa-circRNA9275-10	HSA_CIRCpedia_289	exon	PCGF6	1.06333	0.00138903
chrX:77264599|77275895	hsa-ATP7A_0004	-	hsa_circ_29952	hsa-circRNA8080-32	HSA_CIRCpedia_66322	exon	ATP7A	1.06257	0.00033611
chr7:17929986|17937069	hsa-SNX13_0003	hsa_circ_0079524	hsa_circ_09484	hsa-circRNA15046-11	HSA_CIRCpedia_57550	exon	SNX13	1.06245	0.00181822
chr2:58386785|58393009	hsa-FANCL_0009	-	-	hsa-circRNA12516-2	-	exon	FANCL	1.06237	0.000767139
chr22:30374431|30375041	hsa-MTMR3_0014	hsa_circ_0062808	hsa_circ_07835	hsa-circRNA5285-7	HSA_CIRCpedia_36343	exon	MTMR3	1.06062	0.000404392
chr9:86279945|86292876	hsa-UBQLN1_0019	hsa_circ_0008510	hsa_circ_27424	hsa-circRNA15802-20	HSA_CIRCpedia_64523	exon	UBQLN1	1.06001	0.00163099
chr12:32751431|32764217	hsa-FGD4_0001	hsa_circ_0025843	hsa_circ_21030	hsa-circRNA1733-5	HSA_CIRCpedia_8322	exon	FGD4	1.059	0.00112671
chr21:47734630|47735461	hsa-C21orf58_0001	hsa_circ_0002792	hsa_circ_06904	hsa-circRNA13224-8	HSA_CIRCpedia_35766	exon	C21orf58	1.05631	0.00942298
chr14:45644274|45646179	hsa-FANCM_0010	-	-	hsa-circRNA2281-2	HSA_CIRCpedia_12185	exon	FANCM	1.05359	0.00651848
chr22:20078958|20082318	hsa-DGCR8_0003	hsa_circ_0004322	hsa_circ_00442	hsa-circRNA5218-11	HSA_CIRCpedia_35964	exon	DGCR8	1.05347	0.000305464
chr19:21587931|21588658	hsa-ZNF493_0001	-	hsa_circ_07673	-	HSA_CIRCpedia_67807	exon	ZNF493	1.05244	0.00255712
chr2:24181171|24207701	hsa-UBXN2A_0001	hsa_circ_0052967	hsa_circ_32699	hsa-circRNA4350-3	HSA_CIRCpedia_40292	exon	UBXN2A	1.05239	0.00044859
chr2:26587170|26590088	hsa-EPT1_0001	hsa_circ_0007914	hsa_circ_18588	hsa-circRNA4359-5	HSA_CIRCpedia_40538	exon	SELENOI	1.05181	0.000366507
chr19:34685383|34706566	hsa-LSM14A_0006	hsa_circ_0008030	hsa_circ_00905	hsa-circRNA4008-15	HSA_CIRCpedia_25535	exon	LSM14A	1.05176	0.00147375
chr11:34991686|35006275	hsa-PDHX_0018	hsa_circ_0000290	hsa_circ_24425	hsa-circRNA1290-15	HSA_CIRCpedia_4223	exon	PDHX	1.05057	0.000385146
chrX:117718698|117724265	hsa-DOCK11_0052	hsa_circ_0091382	hsa_circ_22557	hsa-circRNA8128-26	HSA_CIRCpedia_65072	exon	DOCK11	1.04977	0.00327929
chr2:100065798|100081447	hsa-REV1_0003	hsa_circ_0007092	hsa_circ_01719	hsa-circRNA12654-45	HSA_CIRCpedia_37216	exon	REV1	1.04945	0.00131057
chr6:57058640|57075243	hsa-RAB23_0002	hsa_circ_0004119	hsa_circ_17238	hsa-circRNA14793-2	HSA_CIRCpedia_55348	exon	RAB23	1.04837	0.00042719
chr15:59179174|59179739	hsa-SLTM_0014	hsa_circ_0000604	hsa_circ_09595	hsa-circRNA10752-7	HSA_CIRCpedia_14906	exon	SLTM	1.04775	0.000281033
chr5:43161351|43162033	hsa-ZNF131_0002	hsa_circ_0072380	hsa_circ_14208	hsa-circRNA6257-9	HSA_CIRCpedia_51855	exon	ZNF131	1.04743	0.00264477
chr2:190656516|190682906	hsa-PMS1_0016	hsa_circ_0001083	hsa_circ_09074	hsa-circRNA4728-1	HSA_CIRCpedia_38901	exon	PMS1	1.04449	0.000927479
chr15:76576098|76585041	hsa-ETFA_0007	hsa_circ_0005036	hsa_circ_09171	hsa-circRNA10836-28	HSA_CIRCpedia_15747	exon	ETFA	1.04373	0.00307594
chr7:103777228|103805730	hsa-ORC5_0016	hsa_circ_0007612	hsa_circ_14766	hsa-circRNA15264-18	HSA_CIRCpedia_56134	exon	ORC5	1.04361	0.000408139
chr12:111923069|111924628	hsa-ATXN2_0007	hsa_circ_0005756	-	hsa-circRNA10121-46	HSA_CIRCpedia_6673	exon	ATXN2	1.042	0.000386403
chr9:6814631|6893232	hsa-KDM4C_0008	hsa_circ_0086329	hsa_circ_12866	hsa-circRNA7619-9	HSA_CIRCpedia_64300	exon	KDM4C	1.04166	0.0010677
chr2:100078958|100081447	hsa-REV1_0002	hsa_circ_0001053	hsa_circ_20151	hsa-circRNA12654-36	HSA_CIRCpedia_37217	exon	REV1	1.04158	0.00018698
chr5:167995651|167996003	hsa-PANK3_0001	hsa_circ_0006894	hsa_circ_29684	hsa-circRNA14512-4	HSA_CIRCpedia_51071	exon	PANK3	1.04136	0.00228472
chr16:142594|143323	hsa-NPRL3_0004	hsa_circ_0037127	hsa_circ_26008	hsa-circRNA10909-3	HSA_CIRCpedia_16404	exon	NPRL3	1.04057	0.000334326
chr10:96201653|96234540	hsa-TBC1D12_0002	hsa_circ_0008874	hsa_circ_21321	hsa-circRNA1037-1	HSA_CIRCpedia_2852	exon	TBC1D12	1.03971	0.000642511
chr2:109455641|109473426	hsa-CCDC138_0006	hsa_circ_0001061	hsa_circ_04225	hsa-circRNA4580-60	HSA_CIRCpedia_37428	exon	CCDC138	1.03949	0.000390301
chr13:95686859|95705438	hsa-ABCC4_0016	hsa_circ_0030567	-	hsa-circRNA10329-85	HSA_CIRCpedia_11196	exon	ABCC4	1.0392	0.000712883
chr10:103552596|103567658	hsa-MGEA5_0028	hsa_circ_0019606	hsa_circ_14073	hsa-circRNA9265-5	HSA_CIRCpedia_127	exon	OGA	1.03778	0.00582597
chr14:21870116|21871822	hsa-CHD8_0016	hsa_circ_0031191	hsa_circ_16058	hsa-circRNA10374-2	HSA_CIRCpedia_11684	exon		1.03725	0.000446802
chr1:35846860|35854683	hsa-ZMYM4_0002	hsa_circ_0000051	hsa_circ_30294	hsa-circRNA199-49	HSA_CIRCpedia_31535	exon	ZMYM4	1.03707	0.00381626
chr2:9048751|9114564	hsa-MBOAT2_0041	-	-	hsa-circRNA12402-10	HSA_CIRCpedia_42587	exon	MBOAT2	1.0367	0.00138903
chr8:17125767|17143936	hsa-VPS37A_0019	hsa_circ_0008555	hsa_circ_30380	hsa-circRNA7361-2	HSA_CIRCpedia_60444	exon	VPS37A	1.03655	0.0119294
chr11:1307232|1317024	hsa-TOLLIP_0001	hsa_circ_0008301	hsa_circ_07268	hsa-circRNA9365-4	HSA_CIRCpedia_3758	exon	TOLLIP	1.036	0.0235931
chr10:116603500|116608496	hsa-FAM160B1_0004	hsa_circ_0006610	hsa_circ_28207	hsa-circRNA1118-9	HSA_CIRCpedia_480	exon	FAM160B1	1.03592	0.00643106
chr17:7402358|7402810	hsa-POLR2A_0005	hsa_circ_0000741	hsa_circ_26055	hsa-circRNA3215-53	HSA_CIRCpedia_22419	exon	POLR2A	1.03464	0.000466066
chr17:3969741|3976050	hsa-ZZEF1_0023	hsa_circ_0004767	hsa_circ_09659	hsa-circRNA11287-74	HSA_CIRCpedia_20639	exon	ZZEF1	1.03379	0.00104033
chr3:50004903|50012825	hsa-RBM6_0001	hsa_circ_0065769	hsa_circ_02996	hsa-circRNA5571-51	HSA_CIRCpedia_46166	exon	RBM6	1.03328	0.00240217
chr9:34096714|34098515	hsa-DCAF12_0001	-	hsa_circ_32821	hsa-circRNA15726-4	HSA_CIRCpedia_63957	exon	DCAF12	1.03236	0.000490416
chr17:80858527|80861354	hsa-TBCD_0044	hsa_circ_0046562	-	hsa-circRNA3581-166	HSA_CIRCpedia_22965	exon	TBCD	1.03234	0.0112018
chr3:152132730|152173366	hsa-MBNL1_0015	-	-	hsa-circRNA5778-10	-	exon	MBNL1	1.03231	0.00816563
chr6:56989532|57025950	hsa-ZNF451_0033	-	hsa_circ_03889	hsa-circRNA6792-16	HSA_CIRCpedia_55338	exon	ZNF451	1.03179	0.000306572
chr2:48065998|48066908	hsa-FBXO11_0005	hsa_circ_0003872	hsa_circ_14947	hsa-circRNA12500-26	HSA_CIRCpedia_41567	exon	FBXO11	1.03136	0.00174745
chr2:240929491|240961757	hsa-NDUFA10_0002	hsa_circ_0058919	hsa_circ_17563	hsa-circRNA12936-15	HSA_CIRCpedia_40249	exon	NDUFA10	1.03072	0.007527
chr9:5021963|5055788	hsa-JAK2_0015	hsa_circ_0008571	hsa_circ_29457	hsa-circRNA7613-15	HSA_CIRCpedia_68071	exon	JAK2	1.03064	0.000369254
chr17:37579580|37584043	hsa-MED1_0003	hsa_circ_0043428	hsa_circ_16800	hsa-circRNA11450-28	HSA_CIRCpedia_20490	exon	MED1	1.0292	0.000747489
chr3:193374869|193385069	hsa-OPA1_0001	-	-	-	HSA_CIRCpedia_370328	exon	OPA1	1.02889	0.00364612
chr1:247320302|247323115	hsa-ZNF124_0006	hsa_circ_0005667	hsa_circ_05274	hsa-circRNA9019-4	-	exon	ZNF124	1.02745	0.00663473
chr13:113158346|113181798	hsa-TUBGCP3_0012	hsa_circ_0007031	hsa_circ_13021	hsa-circRNA10351-29	HSA_CIRCpedia_10104	exon	TUBGCP3	1.02744	0.00870208
chr18:13048858|13059311	hsa-CEP192_0031	hsa_circ_0047021	hsa_circ_14298	hsa-circRNA3617-31	HSA_CIRCpedia_23230	exon		1.02412	0.00050729
chr13:21735929|21746820	hsa-SKA3_0007	hsa_circ_0029696	-	hsa-circRNA10221-4	HSA_CIRCpedia_10338	exon	SKA3	1.02411	0.000786319
chr8:100108540|100133673	hsa-VPS13B_0071	hsa_circ_0085053	-	hsa-circRNA7522-76	HSA_CIRCpedia_59559	exon	VPS13B	1.02411	0.000446759
chr22:30221076|30228331	hsa-ASCC2_0004	hsa_circ_0003468	hsa_circ_01707	hsa-circRNA13295-17	HSA_CIRCpedia_36334	exon	ASCC2	1.02381	0.00444277
chr19:45766371|45766625	hsa-MARK4_0007	hsa_circ_0000940	hsa_circ_23703	hsa-circRNA4144-29	HSA_CIRCpedia_26146	exon	MARK4	1.02375	0.00424917
chr20:30954187|30978970	hsa-ASXL1_0004	-	-	-	-	intron	ASXL1	1.02186	0.00692734
chr3:178921332|178922376	hsa-PIK3CA_0003	-	hsa_circ_09542	hsa-circRNA5812-6	HSA_CIRCpedia_44515	exon	PIK3CA	1.02183	0.000608254
chr13:42385361|42407667	hsa-VWA8_0040	hsa_circ_0006049	hsa_circ_32692	hsa-circRNA10272-30	HSA_CIRCpedia_10745	exon	VWA8	1.02138	0.00903889
chr11:755879|760253	hsa-TALDO1_0002	hsa_circ_0003307	hsa_circ_03922	hsa-circRNA1183-5	HSA_CIRCpedia_5639	exon	TALDO1	1.02093	0.00366958
chr17:28011581|28030080	hsa-SSH2_0001	hsa_circ_0000754	hsa_circ_27180	hsa-circRNA11411-54	HSA_CIRCpedia_19991	exon	SSH2	1.02072	0.00140074
chr4:39739040|39776553	hsa-UBE2K_0001	hsa_circ_0002590	hsa_circ_08524	hsa-circRNA5968-1	HSA_CIRCpedia_48547	exon	UBE2K	1.02036	0.00148906
chr13:96485181|96489456	hsa-UGGT2_0007	hsa_circ_0008274	hsa_circ_10555	hsa-circRNA10332-25	HSA_CIRCpedia_11259	exon	UGGT2	1.01972	0.000974933
chr13:77589544|77595996	hsa-FBXL3_0001	hsa_circ_0008794	hsa_circ_27230	hsa-circRNA10322-5	HSA_CIRCpedia_11099	exon	FBXL3	1.01893	0.000534692
chr14:97312432|97327072	hsa-VRK1_0005	-	-	hsa-circRNA2424-17	HSA_CIRCpedia_13557	exon	VRK1	1.01879	0.00222277
chr8:126194345|126207514	hsa-NSMCE2_0009	-	-	hsa-circRNA7556-1	-	intron	NSMCE2	1.01842	0.00217769
chr22:30353025|30375041	hsa-MTMR3_0001	hsa_circ_0062804	-	hsa-circRNA5285-30	HSA_CIRCpedia_36337	exon	MTMR3	1.01798	0.00641856
chr6:4891947|4892613	hsa-CDYL_0005	hsa_circ_0008285	hsa_circ_20406	hsa-circRNA6595-3	HSA_CIRCpedia_55226	exon	CDYL	1.01712	0.0108105
chr4:71824591|71845008	hsa-MOB1B_0002	hsa_circ_0069920	-	hsa-circRNA6014-6	HSA_CIRCpedia_49034	exon	MOB1B	1.01653	0.00798911
chr2:183993015|183995273	hsa-NUP35_0002	hsa_circ_0004820	hsa_circ_10304	hsa-circRNA4717-6	HSA_CIRCpedia_38839	exon	NUP35	1.01298	0.00230987
chr10:98667022|98711953	hsa-LCOR_0004	hsa_circ_0019316	hsa_circ_21801	hsa-circRNA1046-11	HSA_CIRCpedia_2937	exon	LCOR	1.01288	0.000669599
chr16:46708226|46711310	hsa-VPS35_0005	hsa_circ_0002500	hsa_circ_07817	hsa-circRNA11085-11	HSA_CIRCpedia_17624	exon	VPS35	1.01274	0.00114216
chr11:118451961|118455359	hsa-ARCN1_0002	hsa_circ_0006374	hsa_circ_01104	hsa-circRNA1566-7	HSA_CIRCpedia_3392	exon	ARCN1	1.01167	0.00977346
chr2:202010101|202014558	hsa-CFLAR_0002	hsa_circ_0001092	hsa_circ_17904	hsa-circRNA4751-10	HSA_CIRCpedia_39151	exon	CFLAR	1.01161	0.000747489
chrX:154528098|154528458	hsa-CLIC2_0001	hsa_circ_0092166	-	hsa-circRNA16305	HSA_CIRCpedia_65465	exon	CLIC2	1.01119	0.000583561
chr3:52960047|52962357	hsa-SFMBT1_0008	hsa_circ_0066147	hsa_circ_32050	hsa-circRNA13589-13	HSA_CIRCpedia_46393	exon	SFMBT1	1.01082	0.00759105
chr2:162036125|162081257	hsa-TANK_0004	-	hsa_circ_23953	hsa-circRNA4667-1	HSA_CIRCpedia_38381	exon	TANK	1.01017	0.000842905
chr4:170506500|170511960	hsa-NEK1_0104	-	-	hsa-circRNA14187-5	HSA_CIRCpedia_47941	exon	NEK1	1.00943	0.00175003
chr11:85723324|85742653	hsa-PICALM_0004	hsa_circ_0023940	-	hsa-circRNA9655-101	HSA_CIRCpedia_5908	exon	PICALM	1.0091	0.00116507
chr11:77330651|77340944	hsa-CLNS1A_0002	hsa_circ_0008342	hsa_circ_27173	hsa-circRNA9636-15	HSA_CIRCpedia_5705	exon		1.00833	0.00094709
chr7:40027198|40041630	hsa-CDK13_0002	hsa_circ_0001699	hsa_circ_24058	hsa-circRNA7051-19	HSA_CIRCpedia_58025	exon	CDK13	1.00755	0.0013942
chr2:64778577|64780543	hsa-AFTPH_0002	hsa_circ_0001021	hsa_circ_28683	hsa-circRNA4460-8	HSA_CIRCpedia_42050	exon	AFTPH	1.0075	0.00328351
chr6:42571326|42574389	hsa-UBR2_0001	hsa_circ_0003177	hsa_circ_01975	hsa-circRNA6756-43	HSA_CIRCpedia_54982	exon	UBR2	1.00622	0.00117911
chr1:51702406|51737145	hsa-RNF11_0006	-	-	-	-	exon	RNF11	1.00551	0.00203277
chr21:34804484|34805178	hsa-IFNGR2_0001	hsa_circ_0001185	hsa_circ_03055	hsa-circRNA5140-17	HSA_CIRCpedia_35279	exon	IFNGR2	1.00485	0.00297506
chr16:1364021|1370518	hsa-UBE2I_0001	hsa_circ_0000665	hsa_circ_06012	hsa-circRNA2784-5	HSA_CIRCpedia_16387	exon	UBE2I	1.00448	0.000508354
chr5:112336781|112337371	hsa-DCP2_0002	hsa_circ_0002462	hsa_circ_03842	hsa-circRNA6388-1	HSA_CIRCpedia_68681	exon	DCP2	1.00378	0.00356959
chr11:85685751|85692271	hsa-PICALM_0091	hsa_circ_0023883	hsa_circ_11222	hsa-circRNA9655-16	HSA_CIRCpedia_5853	exon	PICALM	1.00371	0.00554506
chr3:183677521|183732235	hsa-ABCC5_0011	-	-	-	-	exon	ABCC5	1.00337	0.0102727
chr1:29481208|29481422	hsa-SRSF4_0002	hsa_circ_0006602	hsa_circ_04689	hsa-circRNA8397-10	HSA_CIRCpedia_31277	exon	SRSF4	1.00286	0.00389894
chr2:240929491|240954277	hsa-NDUFA10_0001	hsa_circ_0001119	hsa_circ_28916	hsa-circRNA12936-5	HSA_CIRCpedia_40247	exon	NDUFA10	1.00236	0.000512025
chr9:34310722|34311369	hsa-KIF24_0039	-	-	-	HSA_CIRCpedia_371745	exon	KIF24	1.001	0.0111243
chr20:40141485|40162209	hsa-CHD6_0001	hsa_circ_0004359	hsa_circ_30819	hsa-circRNA13059-29	HSA_CIRCpedia_34256	exon	CHD6	-1.08837	0.0136103
chr3:47651556|47680270	hsa-SMARCC1_0002	hsa_circ_0065243	hsa_circ_32044	hsa-circRNA13518-106	HSA_CIRCpedia_45898	exon	SMARCC1	-1.20887	0.0143707
chr17:43159012|43164020	hsa-NMT1_0001	-	hsa_circ_17754	hsa-circRNA3391-2	HSA_CIRCpedia_21045	exon	NMT1	-1.35322	0.00601635
chr11:77386081|77404656	hsa-RSF1_0015	hsa_circ_0023701	hsa_circ_02564	hsa-circRNA9637-2	HSA_CIRCpedia_5714	exon	RSF1	-1.39409	0.0116423
chr14:73181131|73198642	hsa-DPF3_0004	-	hsa_circ_19196	hsa-circRNA10507-2	HSA_CIRCpedia_12947	exon	DPF3	-1.42808	0.0296287
chr2:136505837|136530117	hsa-UBXN4_0022	-	hsa_circ_17796	hsa-circRNA4644-13	HSA_CIRCpedia_37986	exon	UBXN4	-1.51211	0.0101179
chr16:75445723|75448593	hsa-CFDP1_0001	-	-	hsa-circRNA11187-7	HSA_CIRCpedia_117410	exon	CFDP1	-1.57484	0.00285526
chr1:1430865|1464711	hsa-ATAD3A_0001	hsa_circ_0000004	-	hsa-circRNA13-1	-	intergenic_region		-1.6344	0.00239768
chr16:222963|227492	-	-	-	-	-	intergenic_region		-1.75624	0.0015248
chr15:93540187|93541851	hsa-CHD2_0084	hsa_circ_0000655	hsa_circ_23086	hsa-circRNA2740-31	HSA_CIRCpedia_16213	exon	CHD2	-1.82219	0.00936416
chr20:40161689|40179999	hsa-CHD6_0011	hsa_circ_0001159	hsa_circ_27810	hsa-circRNA13059-6	HSA_CIRCpedia_34259	exon	CHD6	-1.98881	0.0166934
chr16:226767|227511	-	-	-	-	-	exon	HBA1	-2.15296	0.000396961
chr4:128995615|128999117	hsa-LARP1B_0015	hsa_circ_0001438	hsa_circ_25298	hsa-circRNA6114-7	HSA_CIRCpedia_47403	exon	LARP1B	-2.17652	0.00618225
chr11:5246866|5247887	-	-	-	-	-	exon	HBB	-2.32695	0.000224131
chr2:90121838|90198770	hsa-IGKV1D-12_0001	-	-	-	-	intergenic_region		-2.35282	0.000226959
chr1:22041882|22048257	hsa-USP48_0005	hsa_circ_0000028	hsa_circ_12590	hsa-circRNA8352-24	HSA_CIRCpedia_30105	exon	USP48	-2.37282	0.0202021
chr17:42398426|42398852	-	-	-	-	-	exon	SLC25A39	-2.55337	0.00012151
chr1:110203787|110233186	hsa-GSTM1_0002	-	-	-	-	intergenic_region		-2.56411	0.000117173
chr11:5248198|5275650	-	-	-	-	-	intergenic_region		-2.71993	8.22907e-05
chr12:56563313|56563992	hsa-SMARCC2_0003	-	hsa_circ_24147	hsa-circRNA9980-18	HSA_CIRCpedia_127424	exon	SMARCC2	-2.82248	0.00346204
chr4:128995615|129003460	hsa-LARP1B_0002	hsa_circ_0007619	hsa_circ_05562	hsa-circRNA6114-11	HSA_CIRCpedia_47404	exon	LARP1B	-2.8376	0.00170432
chr16:227321|227473	-	-	-	-	-	exon	HBA1	-2.86293	0.000173227
chr16:223471|227132	-	-	-	-	-	intergenic_region		-2.93941	2.16786e-06
chr16:88675342|88677944	hsa-ZC3H18_0002	hsa_circ_0004640	hsa_circ_11029	hsa-circRNA3140-12	HSA_CIRCpedia_19043	exon	ZC3H18	-2.99699	0.000117952
chr1:117944808|118009049	hsa-MAN1A2_0001	hsa_circ_0000120	hsa_circ_00014	hsa-circRNA471-18	HSA_CIRCpedia_27488	exon	MAN1A2	-3.01373	5.9257e-05
chr1:207504453|207504641	hsa-CD55_0010	hsa_circ_0016295	-	hsa-circRNA717-1	HSA_CIRCpedia_29697	exon	CD55	-3.04536	5.28855e-05
chr1:174188639|174189592	hsa-RABGAP1L_0173	-	-	-	-	intron	RABGAP1L	-3.07844	0.000197148
chr2:113057426|113057606	hsa-ZC3H6_0005	hsa_circ_0001062	hsa_circ_29406	hsa-circRNA4588-3	HSA_CIRCpedia_114119	exon	ZC3H6	-3.08616	5.45287e-05
chr1:171493960|171506612	hsa-PRRC2C_0035	-	-	-	HSA_CIRCpedia_114866	exon	PRRC2C	-3.0867	1.41574e-06
chr11:5246870|5248029	hsa-HBB_0003	-	-	-	-	exon	HBB	-3.09826	4.5353e-05
chr1:117944808|117984947	hsa-MAN1A2_0008	hsa_circ_0000119	hsa_circ_29618	hsa-circRNA471-26	HSA_CIRCpedia_27487	exon	MAN1A2	-3.12899	0.000987592
chr14:31404369|31425448	hsa-STRN3_0005	hsa_circ_0031446	hsa_circ_23387	hsa-circRNA10414-3	HSA_CIRCpedia_11859	exon	STRN3	-3.16428	1.30647e-05
chr1:154207067|154207767	hsa-UBAP2L_0019	-	hsa_circ_08600	hsa-circRNA529-35	HSA_CIRCpedia_28081	exon	UBAP2L	-3.18864	7.35662e-06
chr22:41568503|41569788	hsa-EP300_0004	-	hsa_circ_22616	hsa-circRNA5346-59	HSA_CIRCpedia_117530	exon	EP300	-3.19722	4.27108e-05
chr9:5968019|5988545	hsa-KIAA2026_0003	-	hsa_circ_13285	hsa-circRNA15684-1	HSA_CIRCpedia_64262	exon	KIAA2026	-3.20458	0.000999473
chr14:103804664|103806140	hsa-EIF5_0007	-	-	-	HSA_CIRCpedia_85331	exon	EIF5	-3.22928	2.79354e-05
chr16:226949|227464	-	-	-	-	-	exon	HBA1	-3.2483	2.61745e-06
chr19:5598804|5604947	hsa-SAFB2_0002	-	hsa_circ_07081	hsa-circRNA11925-17	HSA_CIRCpedia_26643	exon	SAFB2	-3.25314	1.8786e-07
chr11:5246795|5247919	-	-	-	-	-	exon	HBB	-3.27908	8.30102e-07
chr9:100092436|100093049	hsa-RP11-23J9_0007	-	-	-	HSA_CIRCpedia_371318	exon	STRA6LP	-3.29439	1.64017e-07
chr19:40368303|40384167	hsa-FCGBP_0002	-	hsa_circ_19018	-	HSA_CIRCpedia_348989	exon		-3.29906	3.24445e-07
chr10:32323618|32326535	hsa-KIF5B_0011	-	hsa_circ_20280	hsa-circRNA9098-31	HSA_CIRCpedia_1501	exon	KIF5B	-3.29969	4.7631e-06
chr14:103804694|103805230	hsa-EIF5_0013	-	-	-	-	exon	EIF5	-3.31046	4.65417e-06
chr1:67423742|67428843	hsa-MIER1_0001	-	hsa_circ_29080	hsa-circRNA337-2	HSA_CIRCpedia_32825	exon	MIER1	-3.31127	7.95648e-05
chr4:128995615|129012667	hsa-LARP1B_0004	hsa_circ_0070934	hsa_circ_29501	hsa-circRNA6114-6	HSA_CIRCpedia_47405	exon	LARP1B	-3.32162	0.000297159
chr19:54745902|54822986	-	-	-	-	-	intergenic_region		-3.34276	9.89175e-07
chr14:103804664|103805230	hsa-EIF5_0014	-	-	-	HSA_CIRCpedia_370725	exon	EIF5	-3.3435	2.61745e-06
chr12:54686963|54687104	-	-	-	-	-	exon		-3.36884	1.29871e-05
chr6:3155859|3177876	hsa-TUBB2BP1_0001	-	-	-	-	intergenic_region		-3.37056	1.32964e-05
chr3:196210641|196215554	hsa-RNF168_0002	-	hsa_circ_30032	hsa-circRNA13891-4	HSA_CIRCpedia_106299	exon	RNF168	-3.38419	2.08958e-07
chr15:93543742|93547981	hsa-CHD2_0088	hsa_circ_0036999	hsa_circ_11639	hsa-circRNA2740-28	HSA_CIRCpedia_152478	exon	CHD2	-3.39245	2.22148e-07
chr1:228333731|228334615	-	-	-	-	-	exon	GUK1	-3.39799	1.107e-06
chr17:62465140|62465559	hsa-intergenic_000474	-	-	-	-	intergenic_region		-3.43954	2.19765e-07
chr16:204271|223328	-	-	-	-	-	intergenic_region		-3.45002	3.65285e-07
chr16:215981|223006	-	-	-	-	-	intergenic_region		-3.47406	7.04625e-07
chr1:16811318|16957604	hsa-CROCCP2_0001	-	-	-	-	intergenic_region		-3.51667	3.41207e-07
chr12:104373609|104374740	hsa-TDG_0001	-	-	hsa-circRNA1945-1	HSA_CIRCpedia_72143	exon	TDG	-3.51673	2.44893e-07
chr19:55148183|55179244	hsa-AC009892_0001	-	-	-	-	intergenic_region		-3.58573	2.42654e-05
chr4:144826624|144922436	hsa-GYPB_0004	-	-	-	-	intergenic_region		-3.60256	2.6334e-05
chr8:21939496|21939765	hsa-DMTN_0021	-	-	-	-	exon	DMTN	-3.60379	3.9183e-07
chr12:49523283|49580241	hsa-TUBA1A_0001	-	-	-	-	intergenic_region		-3.61013	3.11147e-07
chr7:102962379|102963241	hsa-DNAJC2_0003	hsa_circ_0081751	-	hsa-circRNA15262-7	HSA_CIRCpedia_68335	exon	DNAJC2	-3.61267	3.69279e-05
chr1:171492360|171502100	hsa-PRRC2C_0023	hsa_circ_0015211	hsa_circ_20060	hsa-circRNA620-3	HSA_CIRCpedia_28699	exon	PRRC2C	-3.62088	5.21262e-07
chr11:5255221|5274635	-	-	-	-	-	intergenic_region		-3.63497	1.16517e-06
chr16:223510|227352	-	-	-	-	-	intergenic_region		-3.65396	1.10021e-06
chr11:5275522|5289827	-	-	-	-	-	intron	HBG2	-3.66476	9.83071e-07
chr16:227282|230869	-	-	-	-	-	intergenic_region		-3.67349	1.73177e-07
chr11:5247854|5248197	-	-	-	-	-	exon	HBB	-3.67733	3.75668e-07
chr11:27359645|27363097	hsa-CCDC34_0003	-	-	-	-	exon	CCDC34	-3.68966	7.8925e-09
chr11:5247905|5275635	-	-	-	-	-	intergenic_region		-3.70377	7.95e-07
chr17:65941525|65972074	hsa-BPTF_0045	hsa_circ_0000799	hsa_circ_00011	hsa-circRNA3488-33	HSA_CIRCpedia_22187	exon	BPTF	-3.74859	2.72745e-06
chr6:18236683|18258636	hsa-DEK_0003	hsa_circ_0075796	hsa_circ_04136	hsa-circRNA14611-5	HSA_CIRCpedia_54558	exon	DEK	-3.74902	1.36514e-05
chr11:5247905|5248197	-	-	-	-	-	exon	HBB	-3.75359	7.27328e-07
chr2:55559702|55562300	hsa-CCDC88A_0059	hsa_circ_0054618	hsa_circ_14599	hsa-circRNA12510-7	HSA_CIRCpedia_41706	exon	CCDC88A	-3.76549	2.45999e-10
chr11:5247868|5248252	-	-	-	-	-	exon	HBB	-3.76657	9.36875e-07
chr1:1601103|1666274	hsa-SLC35E2_0005	hsa_circ_0000006	-	hsa-circRNA8253-13	-	intergenic_region		-3.77333	0.00131685
chr19:4422563|4423871	hsa-CHAF1A_0008	-	-	-	HSA_CIRCpedia_365553	exon	CHAF1A	-3.82974	1.17129e-08
chr8:68044186|68076743	hsa-CSPP1_0042	-	-	-	HSA_CIRCpedia_61550	exon	CSPP1	-3.86255	5.45387e-11
chr3:160131261|160141628	hsa-SMC4_0031	hsa_circ_0067841	-	hsa-circRNA5796-12	HSA_CIRCpedia_44258	exon	SMC4	-3.86809	5.66382e-06
chr1:1572770|1635783	-	-	-	-	-	intergenic_region		-3.87777	3.11147e-07
chr20:62152637|62152942	chr20:63521284|63521589	-	-	-	HSA_CIRCpedia_181085	exon	PPDPF	-3.92279	9.21949e-10
chr19:5591759|5600271	hsa-SAFB2_0010	-	hsa_circ_04703	-	-	exon	SAFB2	-3.92776	6.65748e-12
chr17:38551701|38555383	hsa-TOP2A_0007	hsa_circ_0006964	hsa_circ_12300	hsa-circRNA11458-25	HSA_CIRCpedia_67217	exon	TOP2A	-3.93001	1.01247e-07
chr16:214511|227464	-	-	-	-	-	intergenic_region		-3.93121	4.37861e-07
chr2:99976699|99988193	hsa-EIF5B_0002	-	-	-	HSA_CIRCpedia_360541	exon	EIF5B	-3.95682	5.80405e-12
chr11:5248160|5269648	-	-	-	-	-	intergenic_region		-3.96726	1.11722e-06
chr11:5274573|5275616	hsa-HBG2_0031	-	-	-	-	exon	HBG2	-3.97771	8.928e-09
chr16:223154|227464	-	-	-	-	-	intergenic_region		-3.97902	1.98803e-09
chr13:46549418|46563232	hsa-ZC3H13_0025	-	-	hsa-circRNA10282-6	HSA_CIRCpedia_151528	exon	ZC3H13	-3.97903	5.63901e-12
chr7:155493467|155499762	hsa-RBM33_0031	-	hsa_circ_15320	hsa-circRNA7330-4	HSA_CIRCpedia_57343	exon	RBM33	-3.985	1.57656e-08
chr1:1417518|1454370	hsa-ATAD3A_0002	-	-	-	-	intergenic_region		-4.03177	1.22439e-10
chr12:54686833|54687104	hsa-NFE2_0002	-	-	-	-	exon		-4.03293	1.49229e-07
chr1:150195512|150201570	hsa-ANP32E_0006	-	-	-	HSA_CIRCpedia_177521	exon	ANP32E	-4.03326	5.62946e-10
chr15:93543742|93558139	hsa-CHD2_0085	hsa_circ_0037002	hsa_circ_27251	hsa-circRNA2740-47	HSA_CIRCpedia_16216	exon	CHD2	-4.03949	7.13691e-06
chr19:54784318|54823640	-	-	-	-	-	intergenic_region		-4.06901	7.20894e-11
chr16:223584|227461	hsa-HBA1_0003	-	-	-	-	intergenic_region		-4.07661	1.82975e-05
chr17:38551701|38552717	hsa-TOP2A_0009	hsa_circ_0005877	hsa_circ_03122	hsa-circRNA11458-7	HSA_CIRCpedia_67216	exon	TOP2A	-4.09465	7.49425e-07
chr19:10270334|10288043	hsa-DNMT1_0014	hsa_circ_0049220	-	hsa-circRNA11981-27	HSA_CIRCpedia_24549	exon	DNMT1	-4.09896	5.23257e-11
chr19:5595372|5600271	hsa-SAFB2_0008	-	-	-	HSA_CIRCpedia_168017	exon	SAFB2	-4.11411	3.98742e-11
chr1:145640883|145650540	-	-	-	-	-	intron		-4.11896	2.21999e-09
chr17:76000251|76027923	hsa-TNRC6C_0002	hsa_circ_0008622	-	hsa-circRNA3542-1	-	exon	TNRC6C	-4.12996	0.00370575
chr11:5246791|5247867	hsa-HBB_0005	-	-	-	-	exon	HBB	-4.13497	9.96923e-09
chr3:160131261|160137331	hsa-SMC4_0016	-	-	-	HSA_CIRCpedia_40193	exon	SMC4	-4.14065	0.000612311
chr11:5246827|5247878	-	-	-	-	-	exon	HBB	-4.14303	9.40089e-09
chrX:122744769|122748040	hsa-THOC2_0001	-	-	hsa-circRNA16227-33	HSA_CIRCpedia_56613	exon	THOC2	-4.14812	2.50213e-08
chr7:98995485|99002576	hsa-PDAP1_0002	-	-	-	HSA_CIRCpedia_360432	exon	PDAP1	-4.1526	7.41769e-10
chr16:203921|227464	-	-	-	-	-	intergenic_region		-4.15263	3.84168e-07
chr3:169700495|169706147	hsa-SEC62_0006	hsa_circ_0067883	-	hsa-circRNA5802-4	HSA_CIRCpedia_112980	exon	SEC62	-4.15491	1.02664e-10
chr5:112227300|112228735	hsa-CTC-487M23_0004	-	-	-	-	exon		-4.19455	1.03845e-09
chr9:33960824|33996331	hsa-UBAP2_0056	hsa_circ_0086724	-	hsa-circRNA15725-40	HSA_CIRCpedia_125517	exon	UBAP2	-4.19704	1.34117e-06
chr14:50292585|50298079	hsa-NEMF_0007	-	hsa_circ_12769	hsa-circRNA10441-71	HSA_CIRCpedia_12231	exon	NEMF	-4.21545	2.98208e-05
chr16:227321|227469	-	-	-	-	-	exon	HBA1	-4.2168	1.24919e-06
chr1:117944808|117957453	hsa-MAN1A2_0002	hsa_circ_0000117	hsa_circ_02600	hsa-circRNA471-33	HSA_CIRCpedia_27485	exon	MAN1A2	-4.22593	1.07402e-05
chr19:18642615|18642761	hsa-FKBP8_0020	-	-	-	-	exon	FKBP8	-4.25412	2.15678e-09
chr12:7064895|7065384	chr12:6955732|6956221	-	-	-	-	exon	PTPN6	-4.26394	3.0595e-11
chr13:46577274|46594692	hsa-ZC3H13_0023	-	-	-	HSA_CIRCpedia_113035	exon	ZC3H13	-4.29709	9.72332e-10
chr12:54686923|54687104	-	-	-	-	-	exon		-4.30727	3.71555e-07
chr16:203921|227473	-	-	-	-	-	intergenic_region		-4.33037	7.22344e-07
chr1:117944808|117963271	hsa-MAN1A2_0003	hsa_circ_0000118	hsa_circ_02643	hsa-circRNA471-11	HSA_CIRCpedia_27486	exon	MAN1A2	-4.36483	0.000131862
chr11:5247942|5248230	-	-	-	-	-	exon	HBB	-4.434	8.70861e-09
chr11:5246734|5270678	-	-	-	-	-	intergenic_region		-4.49668	1.32627e-06
chr16:24762047|24788679	hsa-TNRC6A_0002	hsa_circ_0006008	hsa_circ_30830	hsa-circRNA2913-16	HSA_CIRCpedia_17092	exon	TNRC6A	-4.54791	3.27471e-08
chr1:117944808|117948267	hsa-MAN1A2_0004	hsa_circ_0000116	hsa_circ_11652	hsa-circRNA471-28	HSA_CIRCpedia_69178	exon	MAN1A2	-4.57277	1.24008e-06
chr11:5246815|5270768	-	-	-	-	-	intergenic_region		-4.58061	1.02407e-06
chr14:35269430|35272194	hsa-BAZ1A_0014	-	-	hsa-circRNA10424-5	HSA_CIRCpedia_67646	exon	BAZ1A	-4.5857	1.54292e-08
chr6:18256592|18258636	hsa-DEK_0018	hsa_circ_0008846	hsa_circ_23184	hsa-circRNA14611-2	HSA_CIRCpedia_54560	exon	DEK	-4.61563	1.4464e-08
chr16:223555|227132	-	-	-	-	-	intergenic_region		-4.64522	1.1107e-11
chr11:5246894|5255327	-	-	-	-	-	intergenic_region		-4.65529	1.18326e-08
chr20:55982740|55982938	-	-	-	-	-	exon	RBM38	-4.71388	1.41358e-12
chr16:226958|227473	-	-	-	-	-	exon	HBA1	-4.75962	6.2854e-13
chr6:3157641|3226903	chr6:3157407|3226669	-	-	-	-	intergenic_region		-4.82001	1.3148e-09
chr11:5246933|5275635	-	-	-	-	-	intergenic_region		-4.82277	1.06573e-08
chr12:10572963|10588009	hsa-RP11-277P12_0001	-	-	-	-	intron		-4.85054	6.22806e-13
chr11:5246815|5275692	-	-	-	-	-	intergenic_region		-4.92197	8.91039e-09
chr16:223145|227464	-	-	-	-	-	intergenic_region		-4.94135	4.0563e-07
chr1:150198940|150201570	hsa-ANP32E_0001	-	-	-	HSA_CIRCpedia_113915	exon	ANP32E	-4.96044	3.4877e-09
chr11:5246849|5247887	-	-	-	-	-	exon	HBB	-4.96172	1.04391e-08
chr14:106322011|106322363	hsa-IGHM_0001	-	-	-	-	intergenic_region		-4.99752	3.9981e-13
chr7:141760111|141786128	hsa-MGAM_0004	-	-	-	HSA_CIRCpedia_181688	exon	MGAM	-5.02859	1.3366e-12
chr8:86240824|86244766	hsa-CA1_0005	-	-	-	-	exon	CA1	-5.0516	3.08843e-09
chrX:76907604|76920267	hsa-ATRX_0003	-	-	-	HSA_CIRCpedia_142067	exon	ATRX	-5.0819	4.34415e-13
chr1:228333741|228334625	hsa-GUK1_0007	-	-	-	-	exon	GUK1	-5.08521	7.41994e-13
chr11:5248160|5274566	-	-	-	-	-	intergenic_region		-5.09367	1.49846e-09
chr11:5270598|5275650	hsa-HBG2_0025	-	-	-	-	intergenic_region		-5.10049	9.89973e-10
chr7:38282029|38299831	hsa-TRGC1_0001	-	-	-	-	intergenic_region		-5.11642	1.36581e-11
chr16:223510|227448	-	-	-	-	-	intergenic_region		-5.13666	4.60661e-05
chr16:226958|227464	-	-	-	-	-	exon	HBA1	-5.15352	4.02548e-21
chr16:226949|227461	-	-	-	-	-	exon	HBA1	-5.15905	2.49647e-21
chr3:169694734|169706147	hsa-SEC62_0004	hsa_circ_0001358	hsa_circ_27621	hsa-circRNA5802-2	HSA_CIRCpedia_44315	exon	SEC62	-5.17168	3.71511e-05
chr16:223510|227469	-	-	-	-	-	intergenic_region		-5.18047	9.29278e-07
chr3:169694734|169703653	hsa-SEC62_0005	-	-	-	HSA_CIRCpedia_40438	exon	SEC62	-5.23055	4.17666e-09
chr5:158621724|158630664	hsa-RNF145_0001	hsa_circ_0074828	-	hsa-circRNA14503-1	HSA_CIRCpedia_50975	exon	RNF145	-5.24755	5.75302e-07
chr16:223510|227461	-	-	-	-	-	intergenic_region		-5.26468	1.33767e-05
chr2:102472439|102476326	hsa-MAP4K4_0013	-	hsa_circ_05712	-	HSA_CIRCpedia_122533	exon	MAP4K4	-5.31866	1.80744e-21
chr11:5255221|5269717	-	-	-	-	-	intergenic_region		-5.33138	4.43427e-13
chr8:618598|624047	hsa-ERICH1_0001	-	-	hsa-circRNA15395-7	HSA_CIRCpedia_61421	exon	ERICH1	-5.38476	1.02583e-09
chr10:92987464|92987632	chr10:91227707|91227875	-	-	-	-	exon	PCGF5	-5.38958	9.76668e-13
chr11:5246795|5247999	hsa-HBB_0001	-	-	-	-	exon	HBB	-5.53164	9.20988e-13
chr9:33971649|33989124	hsa-UBAP2_0021	hsa_circ_0086729	-	hsa-circRNA15725-45	HSA_CIRCpedia_118184	exon	UBAP2	-5.60227	1.79444e-17
chr3:169693396|169706147	hsa-SEC62_0002	hsa_circ_0067880	hsa_circ_05050	hsa-circRNA5802-7	HSA_CIRCpedia_114237	exon	SEC62	-5.62457	2.60263e-10
chr11:5246894|5275635	-	-	-	-	-	intergenic_region		-5.67066	1.56088e-12
chr15:93540187|93545547	hsa-CHD2_0031	hsa_circ_0036997	hsa_circ_08182	hsa-circRNA2740-26	HSA_CIRCpedia_16214	exon	CHD2	-5.72055	7.73539e-08
chr15:93543742|93552553	hsa-CHD2_0086	hsa_circ_0037000	hsa_circ_20758	hsa-circRNA2740-76	HSA_CIRCpedia_114503	exon	CHD2	-5.76671	6.31764e-06
chr1:1586823|1650894	hsa-RP1-283E3_0030	hsa_circ_0000005	-	hsa-circRNA8253-10	-	intergenic_region		-5.77836	0.00671288
chr11:5247942|5275635	-	-	-	-	-	intergenic_region		-5.78232	5.81137e-13
chr9:33960824|33989124	hsa-UBAP2_0016	-	hsa_circ_25463	hsa-circRNA15725-84	HSA_CIRCpedia_63940	exon	UBAP2	-5.79149	8.50795e-10
chr16:223510|223661	-	-	-	-	-	exon	HBA2	-5.82268	2.2325e-07
chr16:223154|227473	-	-	-	-	-	intergenic_region		-5.84981	1.73195e-20
chr3:196214270|196215554	hsa-RNF168_0001	-	hsa_circ_02590	hsa-circRNA13891-2	HSA_CIRCpedia_45037	exon	RNF168	-6.03607	4.01254e-22
chr16:227321|227461	-	-	-	-	-	exon	HBA1	-6.07538	3.244e-11
chr22:42912017|42973104	hsa-RNU6-513P_0001	hsa_circ_0001242	-	hsa-circRNA13371-8	-	intergenic_region		-6.11999	3.90514e-21
chr11:5248160|5255443	-	-	-	-	-	intergenic_region		-6.19827	1.42112e-09
chr16:223497|227441	hsa-HBA1_0002	-	-	-	-	intergenic_region		-6.20672	7.05979e-09
chr19:4418017|4423871	hsa-CHAF1A_0004	-	-	-	HSA_CIRCpedia_355074	exon	CHAF1A	-6.22901	2.09373e-19
chr11:5269655|5275616	hsa-HBG2_0002	-	-	-	-	intergenic_region		-6.30014	2.63848e-22
chr11:5246734|5247887	-	-	-	-	-	exon	HBB	-6.37199	3.54586e-13
chr11:5247850|5248029	-	-	-	-	-	exon	HBB	-6.44237	9.87562e-21
chrX:76907604|76912143	hsa-ATRX_0023	hsa_circ_0001932	hsa_circ_30809	hsa-circRNA16173-17	HSA_CIRCpedia_112999	exon	ATRX	-6.66771	3.16064e-22
chr16:223510|227473	-	-	-	-	-	intergenic_region		-6.79874	6.4488e-09
chr7:158662546|158669382	hsa-WDR60_0005	hsa_circ_0001778	hsa_circ_12841	hsa-circRNA7335-25	HSA_CIRCpedia_113662	exon	WDR60	-6.81816	1.02787e-13
chr11:5274573|5275635	hsa-HBG2_0007	-	-	-	-	exon	HBG2	-6.98717	9.55684e-23
chr11:5269655|5275635	hsa-HBG2_0004	-	-	-	-	intergenic_region		-7.04441	1.0111e-22
chr22:39358103|39387631	hsa-APOBEC3A_0001	-	-	-	-	intergenic_region		-7.14735	7.85712e-23
chr11:5247807|5254322	-	-	-	-	-	intergenic_region		-7.41585	1.44711e-22
chr4:144922338|145040934	hsa-RP11-673E1_0001	-	-	-	-	intron		-7.51274	5.64187e-12
chr11:5274624|5275635	hsa-HBG2_0022	-	-	-	-	exon	HBG2	-7.56099	3.24543e-23
chr11:5269706|5275635	hsa-HBG2_0003	-	-	-	-	intergenic_region		-7.56617	1.00478e-22
chr11:5248160|5275744	-	-	-	-	-	intergenic_region		-7.80382	3.88496e-23
chr16:223145|227461	-	-	-	-	-	intergenic_region		-8.10286	1.14369e-22
chr11:5248160|5270820	chr11:5226930|5249590	-	-	-	-	intergenic_region		-8.8759	1.05548e-23
chr11:5247807|5274635	chr11:5226577|5253405	-	-	-	-	intergenic_region		-9.05532	2.66549e-23
chr11:5247807|5269717	-	-	-	-	-	intergenic_region		-10.6217	2.2548e-25
