# Supplementary material for: The landscape of circular RNA in preterm birth
Source: Front Immunol. 2022 Aug 22;13:879487. doi: 10.3389/fimmu.2022.879487 (PMC9441874; doi:10.3389/fimmu.2022.879487)
Supplement: Supplementary file 8 [file Table_7.xlsx]

## Sheet: Sheet1
Supplementary Table 7. The DECs shared by different tissues in PTB.
Cord_Blood∩Plasma	Cord_Blood∩Placenta	Cord_Blood∩Monocyte	Cord_Blood∩Chorion	Cord_Blood∩Myometrium	Placenta∩Chorion	Placenta∩Plasma	Monocyte∩Myometrium	Cord_Blood∩Placenta∩Plasma	Cord_Blood∩Placenta∩Myometrium	Monocyte∩Cord_Blood∩Plasma	Monocyte∩Cord_Blood∩Myometrium
chr2:9048751|9098771	chr17:40652725|40653322	chr4:128995615|129003460	chr7:38282029|38299831	chr11:77394755|77404656	chr2:216238045|216256537	chr11:34978931|34999729	chr1:235377084|235384977	chr2:227729320|227732034	chr11:77386081|77404656	chr15:59204762|59209198	chr1:117944808|117984947
chr1:65830318|65831879	chr14:53003437|53011089	chr1:117944808|117957453	chr11:5269706|5275635	chr19:40368303|40384167		chr8:62531537|62557191		chr8:37623044|37623873
chr11:85707869|85714494	chr5:72354260|72373320	chr3:160131261|160137331		chr1:171492360|171502100		chr4:39328183|39329376		chr1:151139410|151139890
chr12:70193989|70195501	chr10:126097111|126100769	chr1:67423742|67428843				chr20:16506737|16509085		chr1:231090079|231097049
chr4:129913322|129925031	chr8:101299729|101300495	chr10:112723883|112745523				chr3:196118684|196120490		chr14:102659800|102661457
chr14:97299804|97327072	chr12:50385781|50386438	chr5:158621724|158630664						chr1:29313943|29314417
chr11:130130751|130131824	chr12:56997143|56999111	chr1:150198940|150201570						chr1:8716032|8716500
chr15:89656956|89659752	chr17:45247283|45249430							chr11:77330651|77340944
chr4:178274462|178281831	chr9:33948372|33948585							chr3:196214270|196215554
chr11:16205432|16208501	chr14:21698478|21702388
chr3:169854207|169867032	chr15:41648237|41669502
chr4:37633007|37640126	chr12:69983265|69985939
chr11:33307959|33309057	chr9:88284400|88327481
chr21:37711077|37717005	chr13:42040959|42042974
chr20:30954187|30956926	chr12:28408514|28460682
chr4:153332455|153333681	chr6:3410422|3416089
chr21:17135210|17138460	chr5:109049221|109065214
chr5:137320946|137324004	chr4:83891480|83900159
chr11:85733410|85742653	chr2:8910800|8917022
chr5:167915607|167921655	chr5:131013396|131044965
chr4:144464662|144465125	chr12:69983265|69987393
chr19:57967021|57967550	chr1:168007609|168014465
chr16:88061089|88071617	chr5:112321532|112339774
chr12:121220458|121222396	chr4:48686690|48712715
chr1:155646339|155649303	chr20:32659872|32666359
chr15:41961026|41962156	chr8:124346118|124348772
chr10:17746430|17747740	chr17:58342773|58372162
chr5:176370336|176385155	chr1:51868107|51874004
chr9:96233423|96261168	chr13:113170754|113181798
chr9:33948372|33953472	chr11:108046973|108047817
chr9:33971649|33973235	chr19:17212470|17213367
chr2:144966170|144969146	chr4:140037803|140060651
chr15:64791492|64792365	chr22:30366965|30375041
chr16:69729039|69729282	chr1:167988783|167992285
chr11:85722073|85742653	chr1:21083659|21107033
chr18:60206914|60217693	chr10:11523769|11527910
chr8:103372299|103373854	chr16:15973661|15978062
chr14:23378692|23380612	chr4:160107794|160131735
chr1:9991949|9994918	chr14:23395342|23396869
chr11:120276827|120280159	chr14:73614503|73640415
chr2:201721405|201721708	chr13:28830429|28855516
chr7:65592691|65599361	chr1:16044388|16047883
chr8:71071740|71075089	chr12:72020040|72022817
chr1:113196220|113202401	chr10:50708584|50714058
chr3:142144064|142145683	chr14:75136352|75138186
chr17:57430576|57430887	chr8:131226802|131249240
chr3:152132730|152150709	chr13:50025689|50042096
chr5:138699448|138700432	chr2:113405230|113410375
chr7:35707044|35712888	chr10:27453993|27454468
chr4:48371866|48385801	chr5:64863340|64868113
chr9:126519982|126531842	chr9:110062422|110074018
chr10:126370176|126370948	chr16:89484692|89497734
chr5:65349234|65350779	chr1:180793889|180794480
chr1:7837220|7838229	chr7:44714010|44714867
chr11:34111726|34113603	chr1:150202906|150204264
chr6:52935855|52941341	chr1:54506429|54509198
chr10:74474869|74475660	chr1:62907159|62907970
chr4:78694235|78697546	chr17:58013576|58013902
chr7:158580695|158591763	chr3:41265512|41268843
chr10:16794538|16824083	chr9:79829245|79842401
chr16:18852887|18856973	chr16:18851020|18853776
chr18:19345733|19359646	chr10:13705453|13712528
chr16:31733947|31734674	chr17:4186093|4210418
chr22:41738533|41739580	chr10:112723883|112724819
chr3:50145503|50145737	chr19:11446123|11446459
chr8:131164982|131193126	chr9:111868788|111870850
chr13:26974590|26975761	chr5:38991051|39003724
chr19:47767860|47768203	chr2:230723488|230744844
chr6:10703638|10705077	chr14:71867511|71884913
chr2:24778884|24807429	chr7:104702611|104707254
chr1:92798948|92846430	chr11:76224430|76239510
chr11:2997254|3000467	chr2:160599572|160605414
chr10:121275021|121286936	chr7:17885218|17890587
chr10:5836848|5842668	chr12:22796697|22826594
chr1:21377359|21437876	chr13:37614542|37625720
chr3:141811903|141820683	chr1:27267948|27268309
chr7:152007051|152012423	chr11:34991686|35006275
chr7:64004085|64004810	chr10:103552596|103567658
chr8:74585342|74601048	chr18:13048858|13059311
chr16:30495148|30495584	chr13:96485181|96489456
chr14:71880665|71884913	chr10:98667022|98711953
chr14:50616726|50616948	chr11:118451961|118455359
chr17:11958206|11999011	chr5:112336781|112337371
chr15:25650608|25660989	chr2:240929491|240954277
chr3:47098311|47108608	chr1:22041882|22048257
chr15:41361768|41362745	chr3:169694734|169703653
chr1:15860732|15863309
chr7:102944289|102944937
chr3:169889161|169896726
chr12:66597491|66622150
chr1:31465237|31468067
chr15:65471272|65472542
chr5:6623327|6625782
chr6:4891947|4892613
chr2:202010101|202014558
chr4:128995615|128999117
chr7:102962379|102963241
chr17:65941525|65972074
chr17:76000251|76027923
chr3:169700495|169706147
chr14:50292585|50298079
chr13:46577274|46594692
chr1:117944808|117963271
chr1:117944808|117948267
